# Supplementary material for: Structural Optimization and Biological Activity of Pyrazole Derivatives: Virtual Computational Analysis, Recovery Assay and 3D Culture Model as Potential Predictive Tools of Effectiveness against Trypanosoma cruzi
Source: MDPI journal article supplement (doi:10.3390/molecules26216742), 2021-11-08

<sup>1</sup>H NMR of compound **1a**

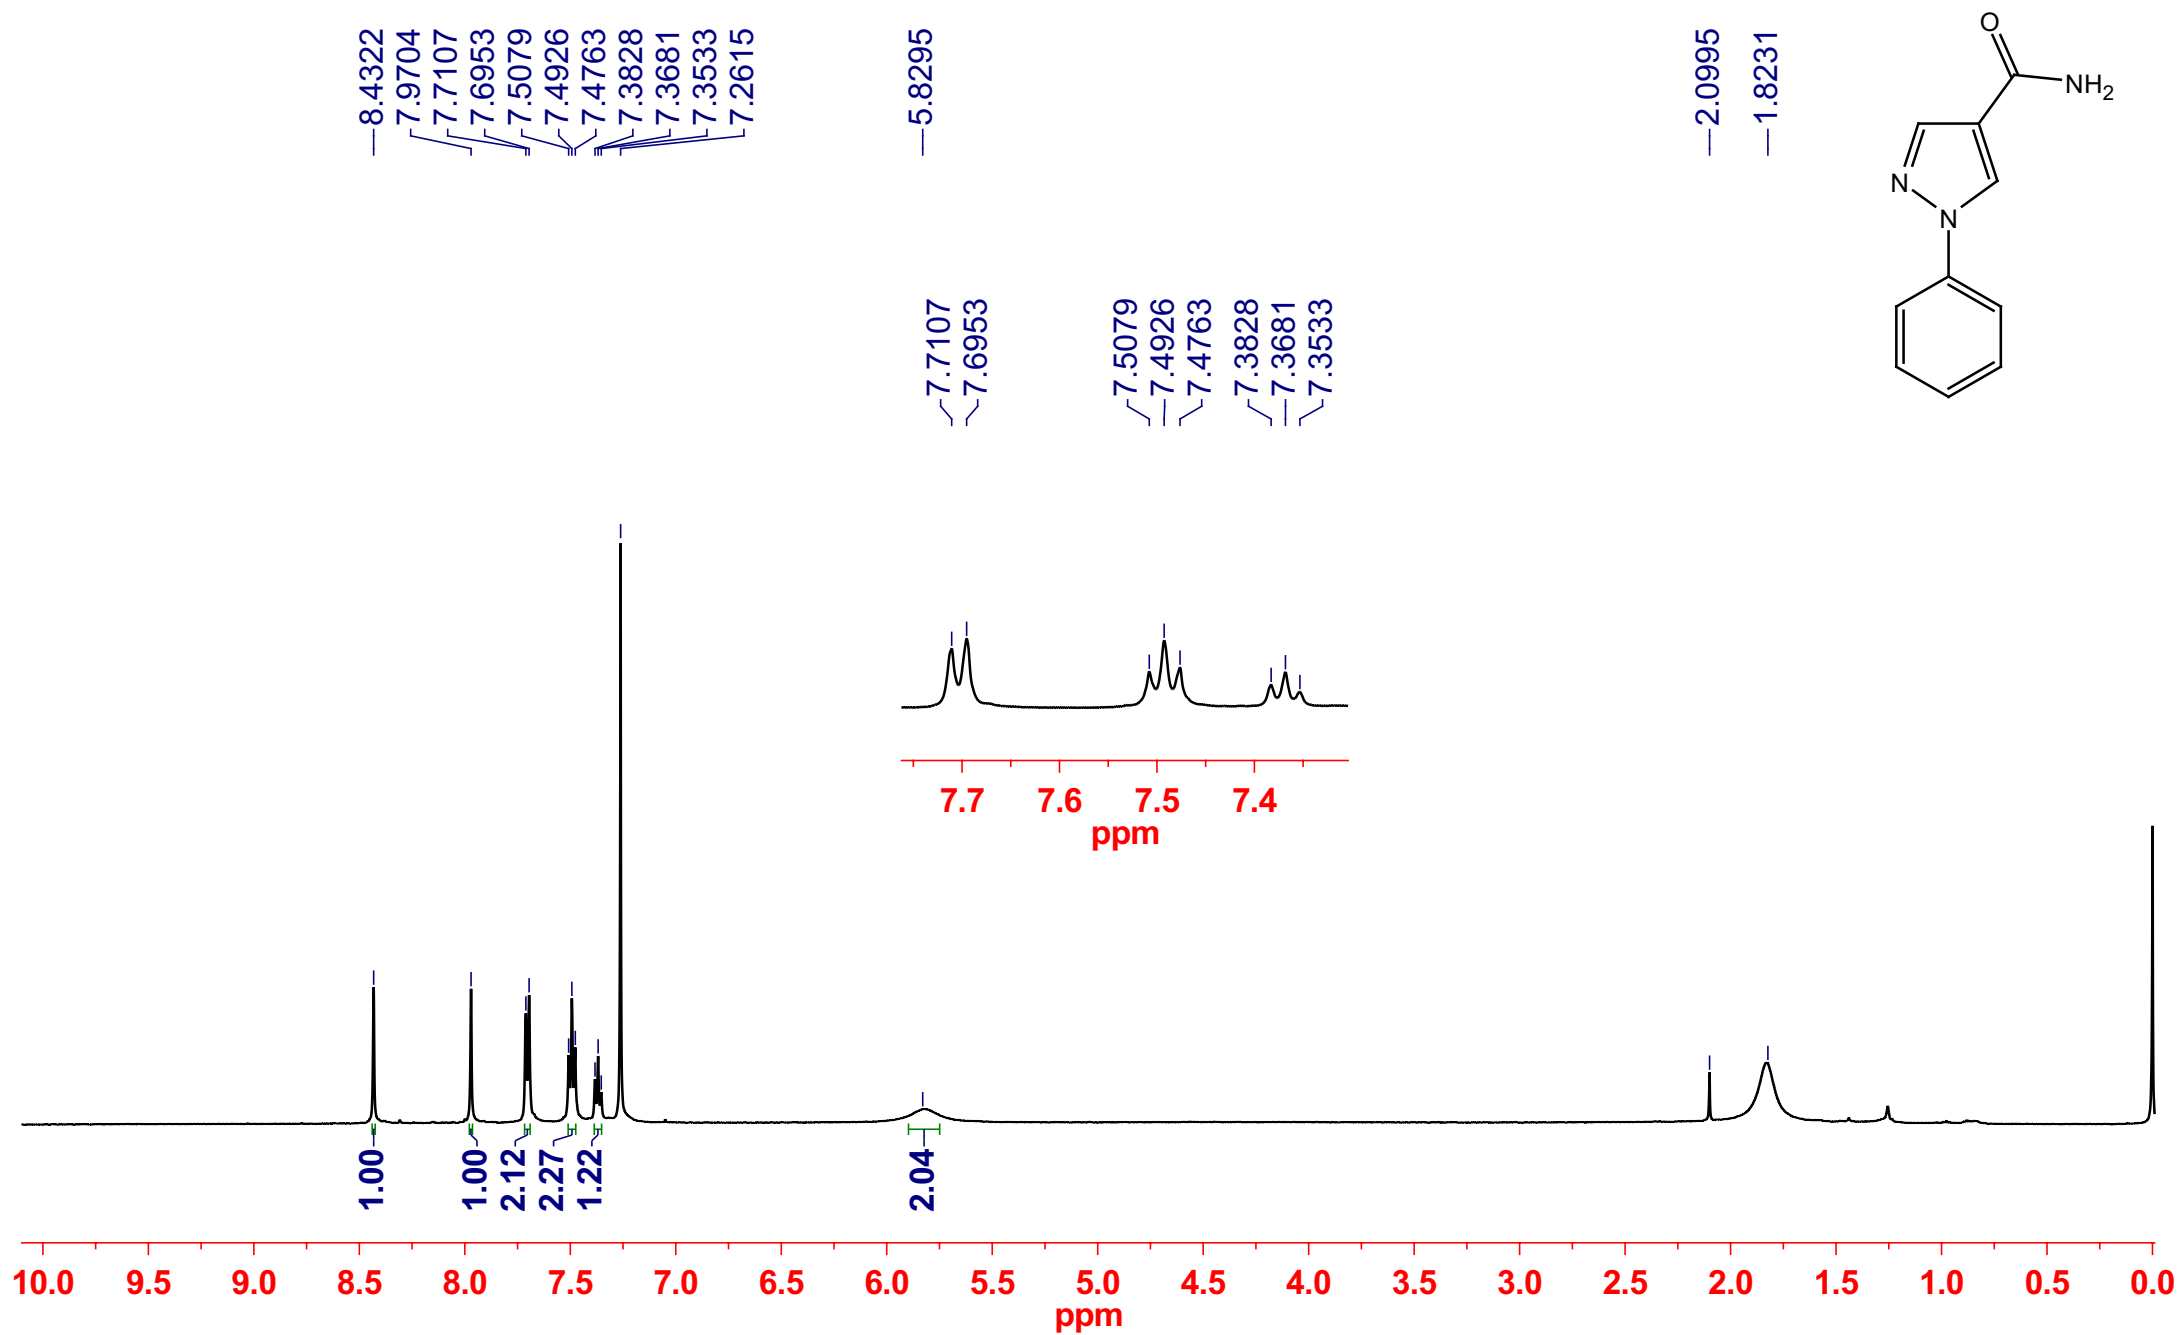

<sup>13</sup>C NMR of compound **1a**

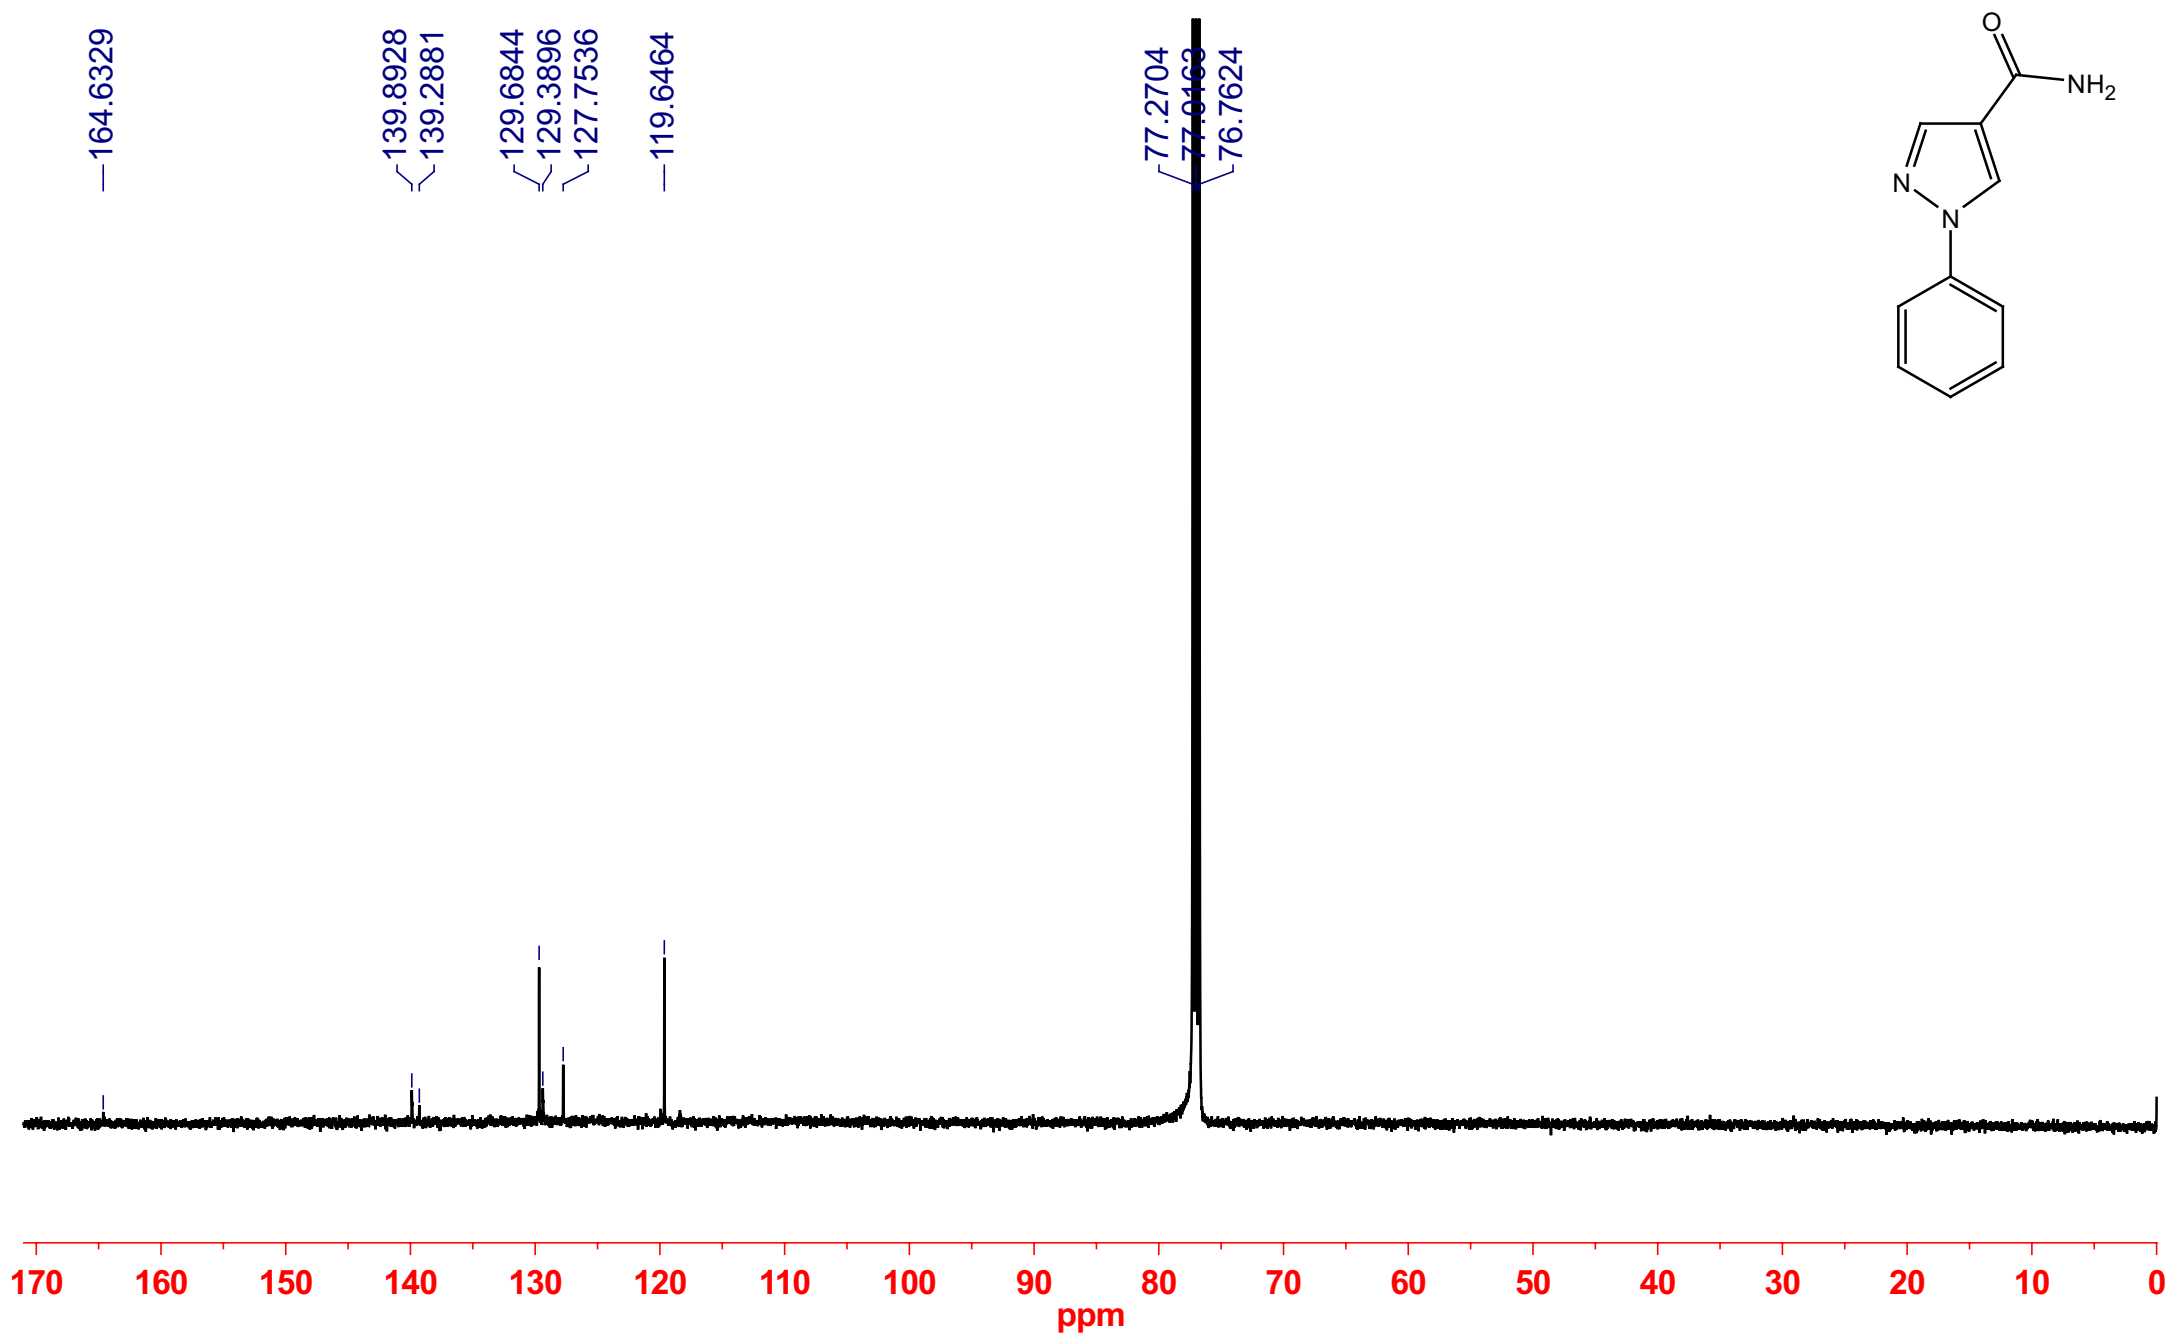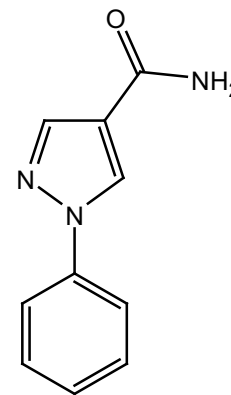

<sup>1</sup>H NMR of compound **1b**

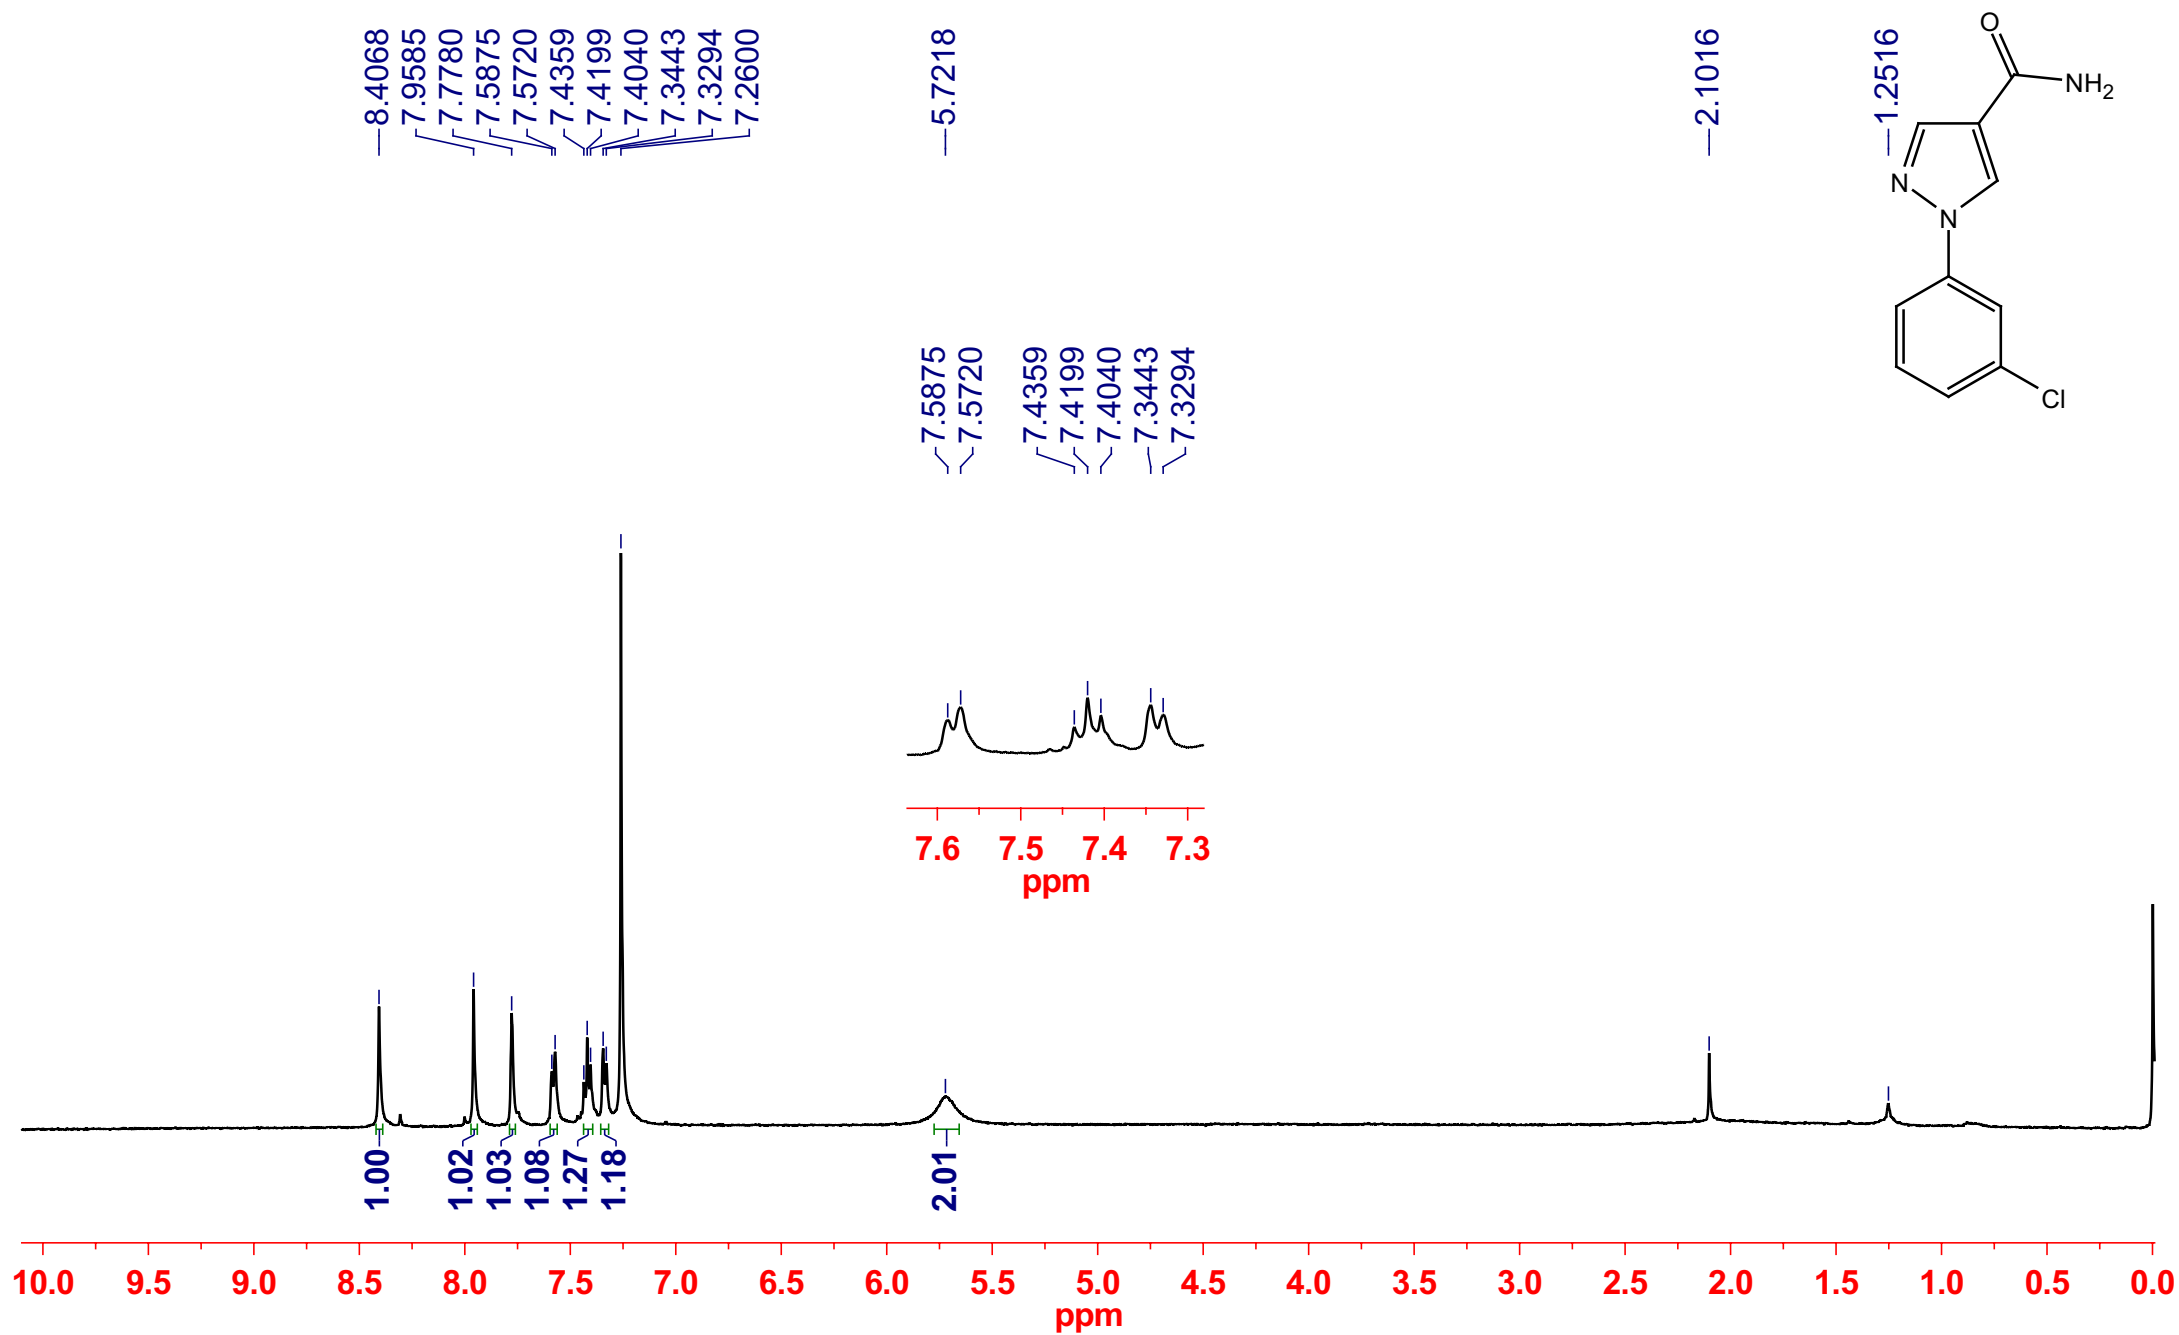

<sup>13</sup>C NMR of compound **1b**

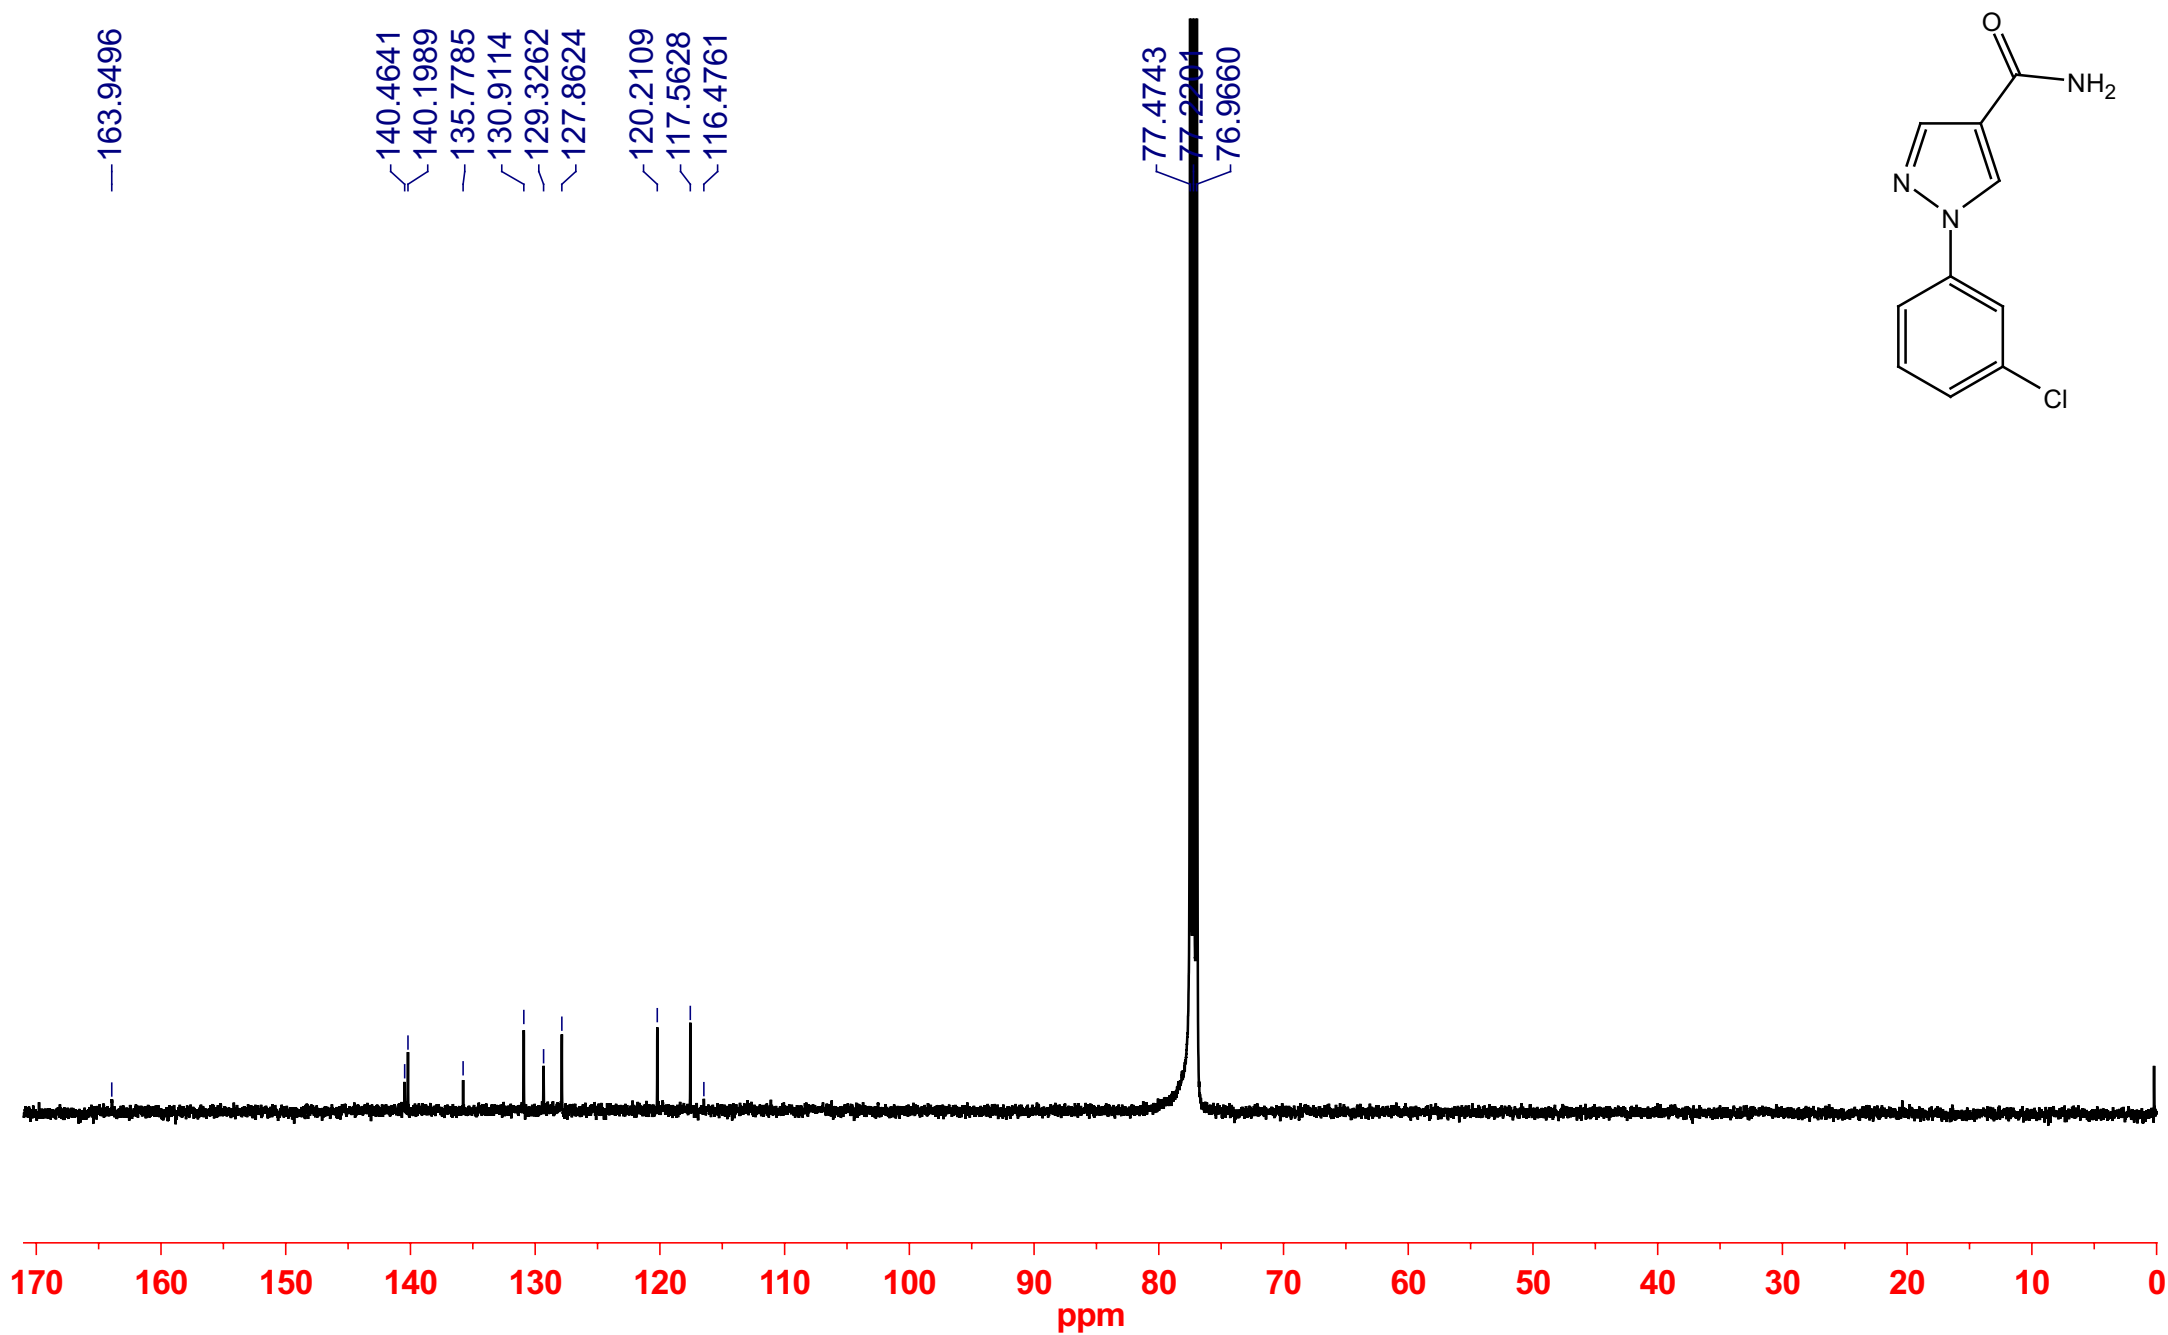



<sup>1</sup>H NMR of compound **1c**

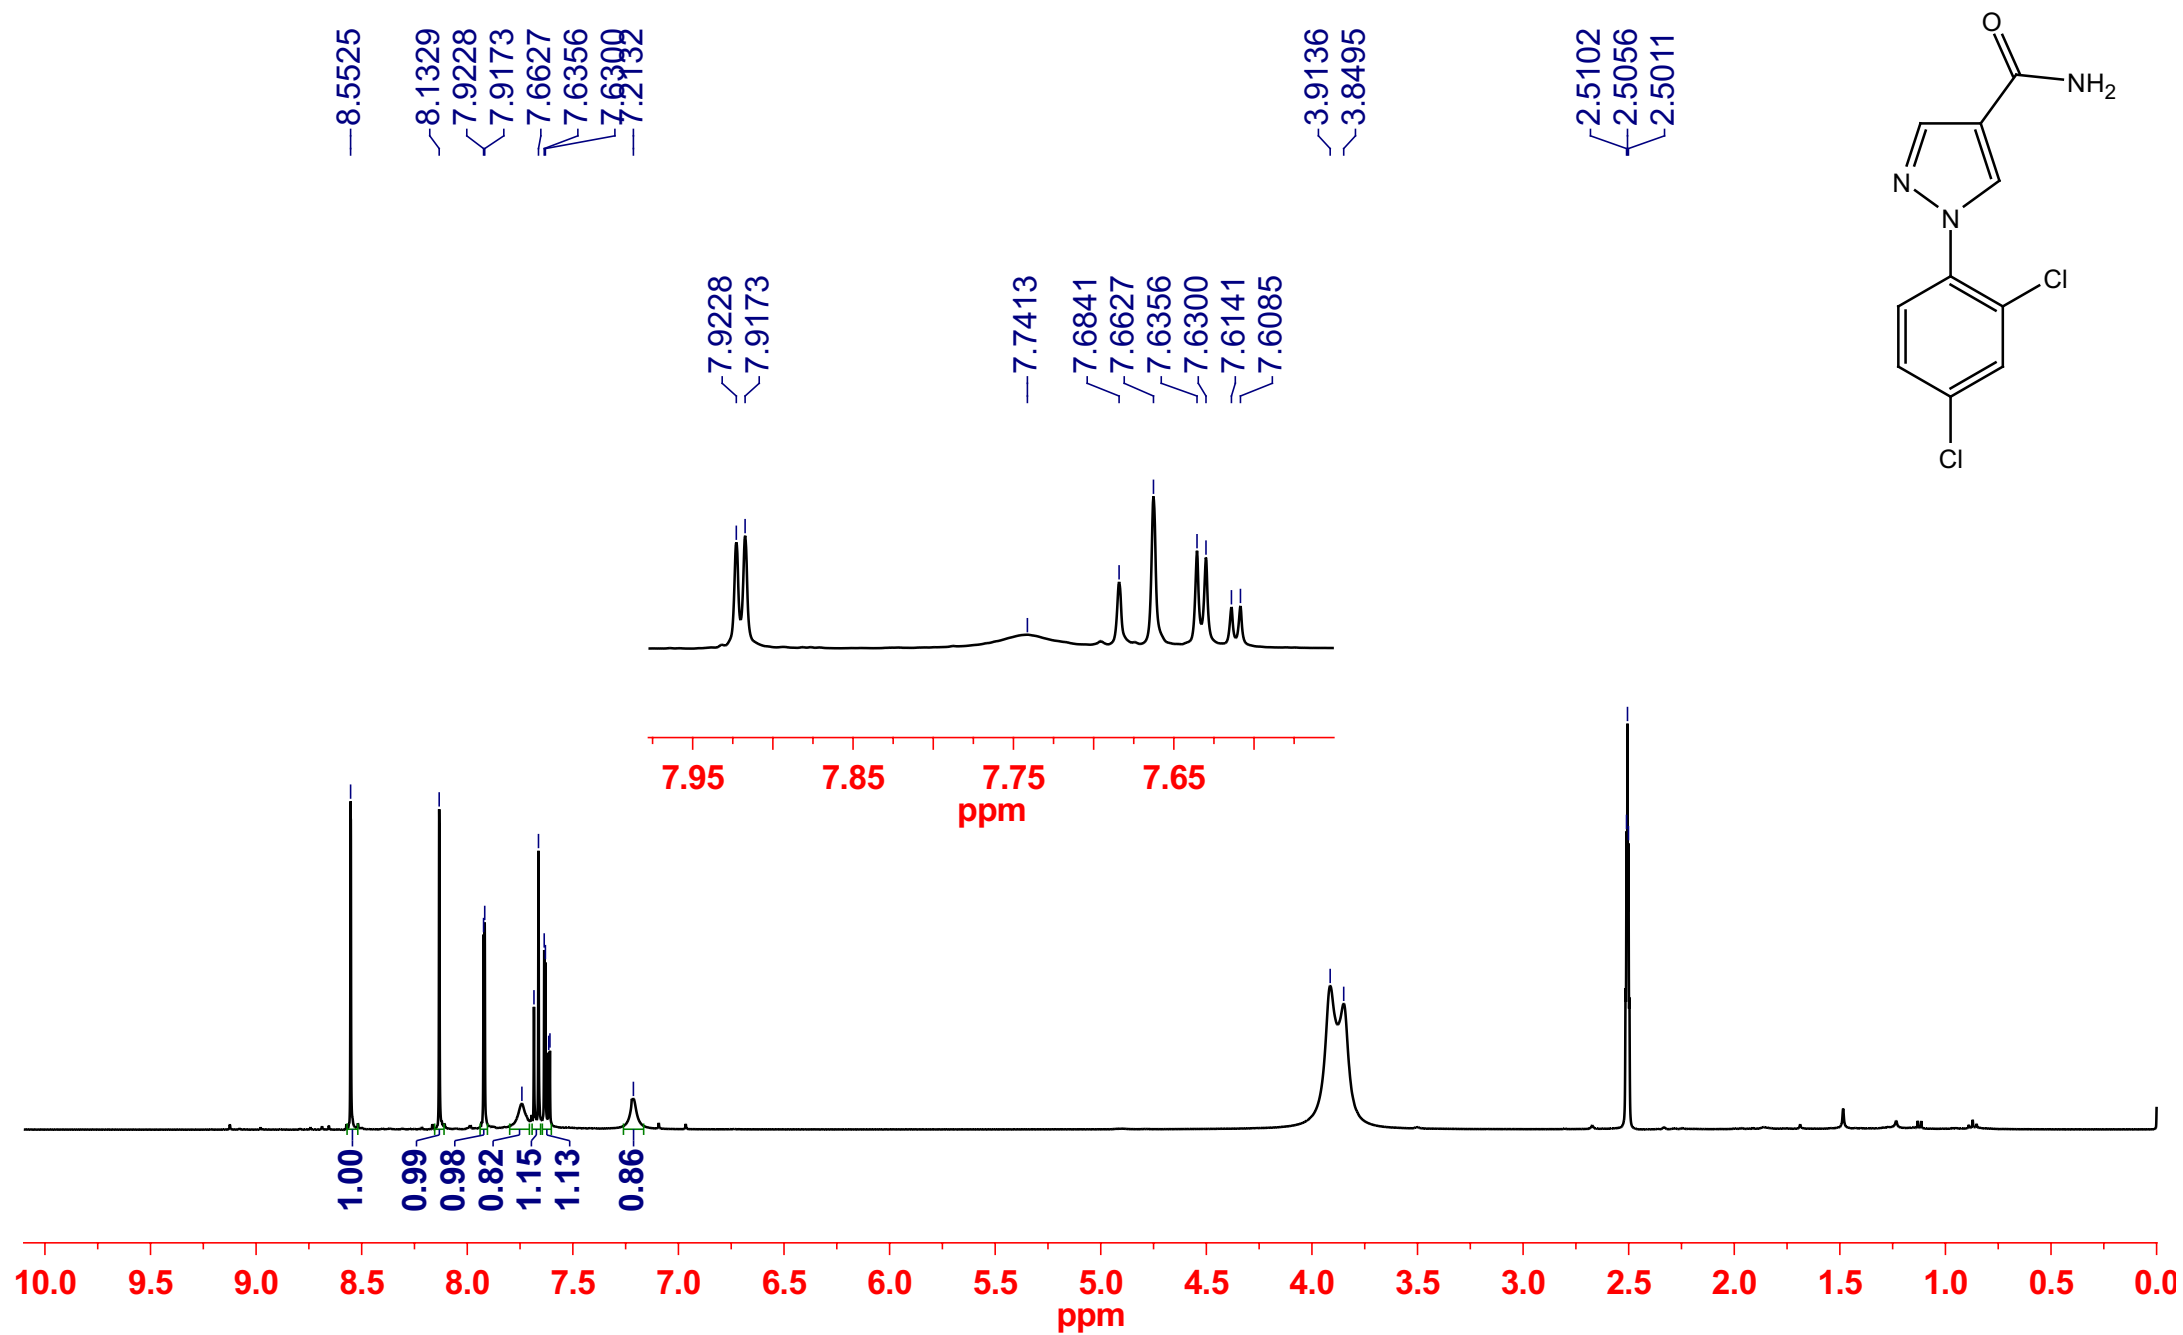

<sup>13</sup>C NMR of compound **1c**

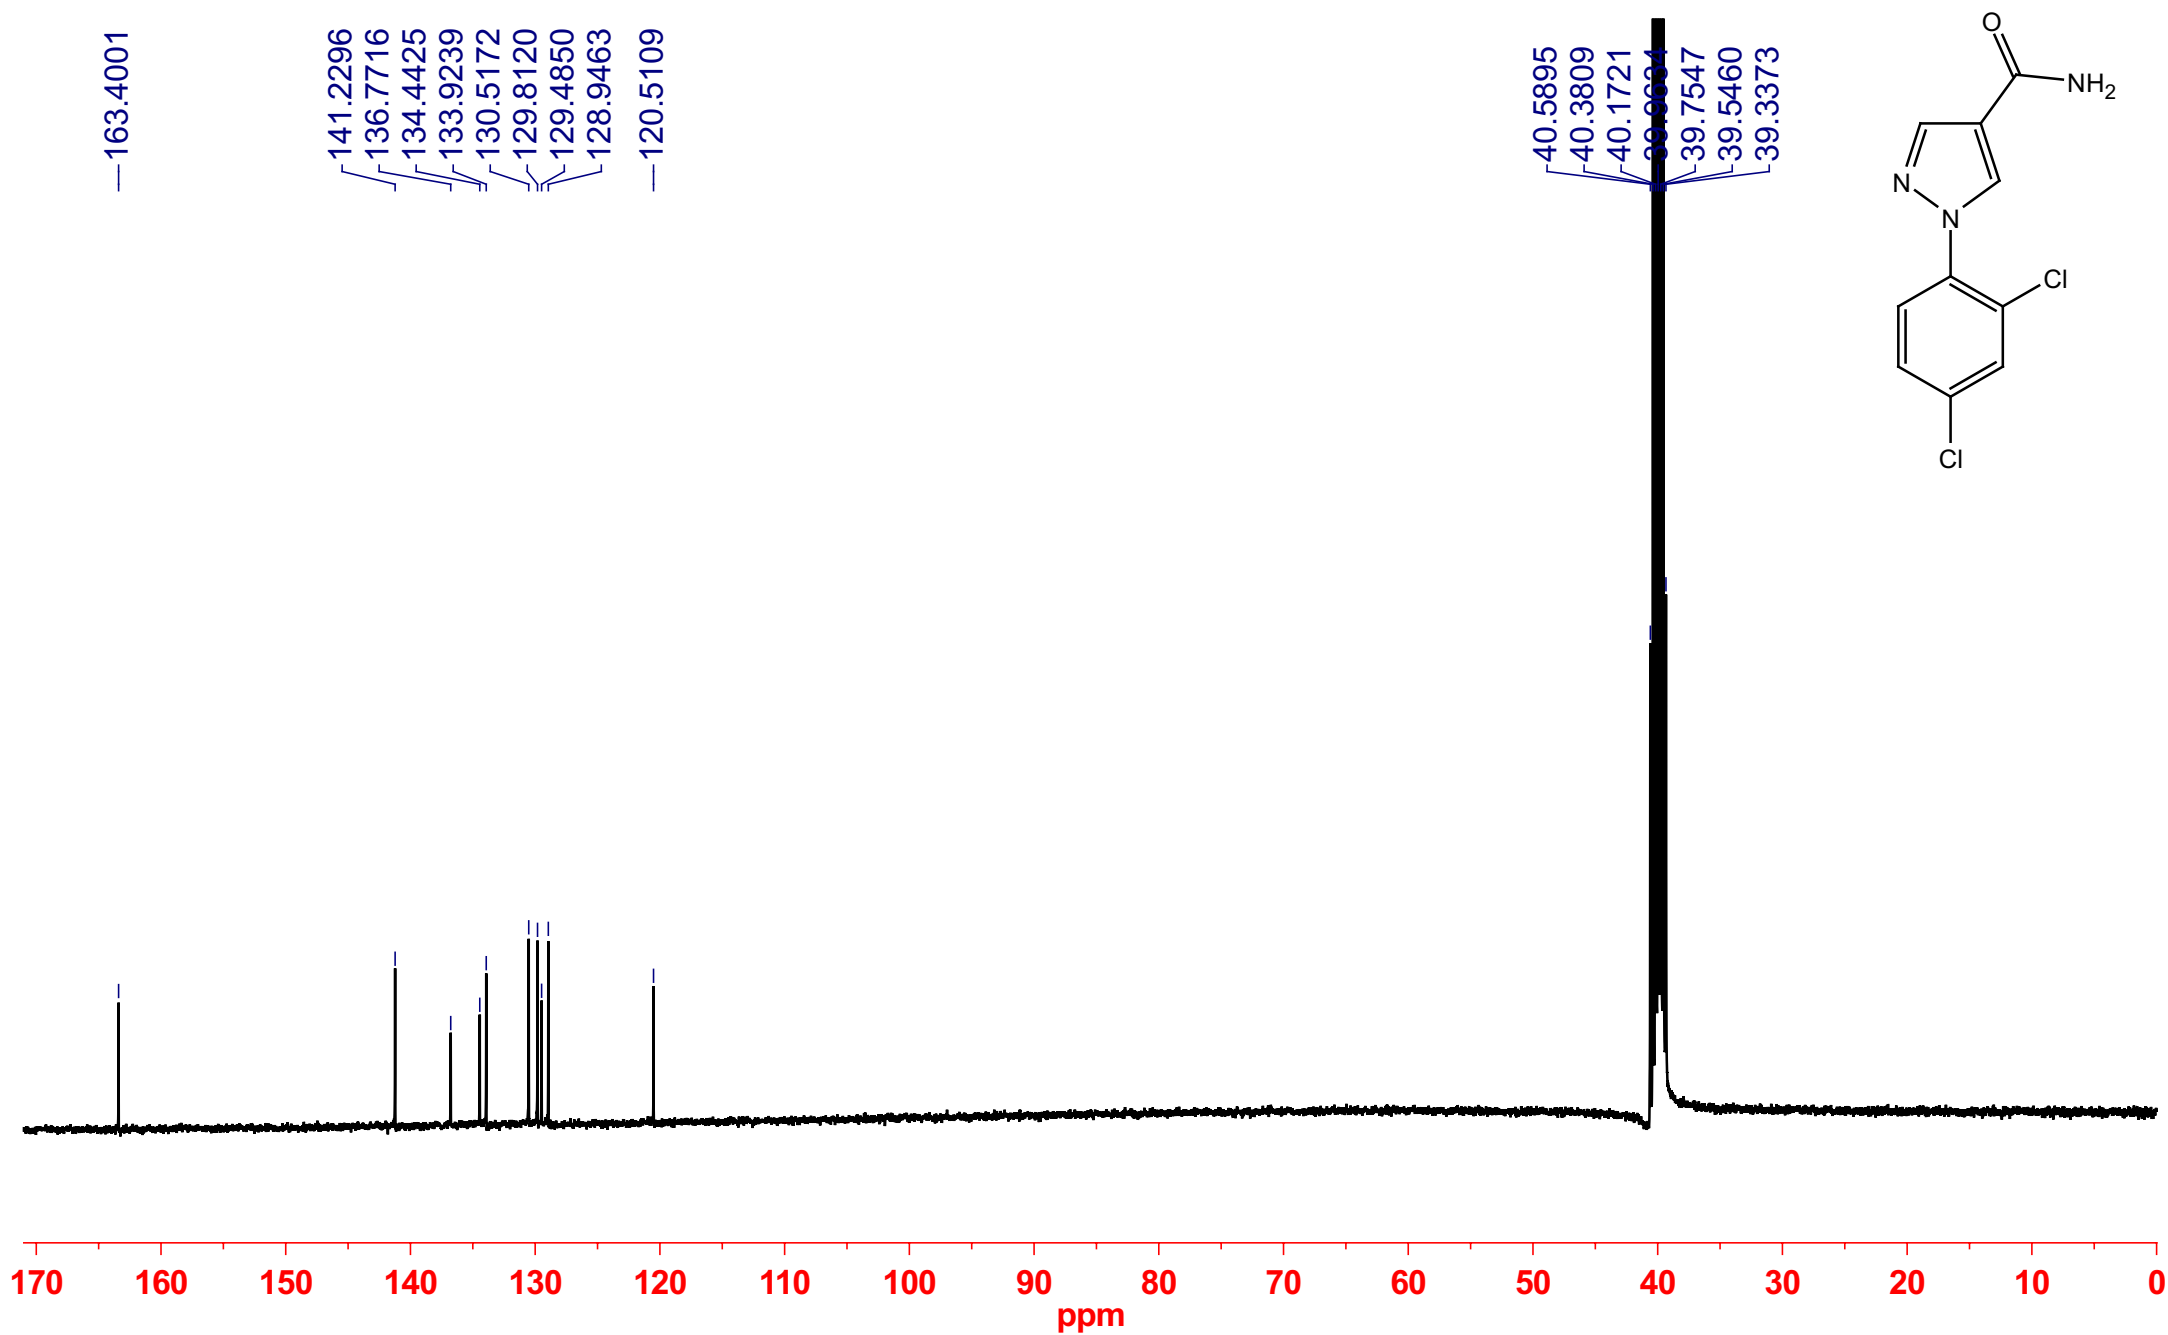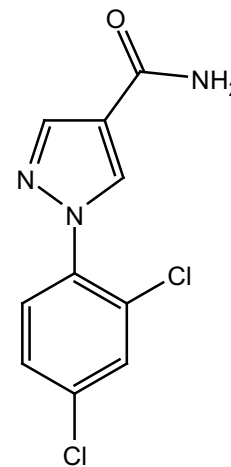

<sup>1</sup>H NMR of compound **1d**

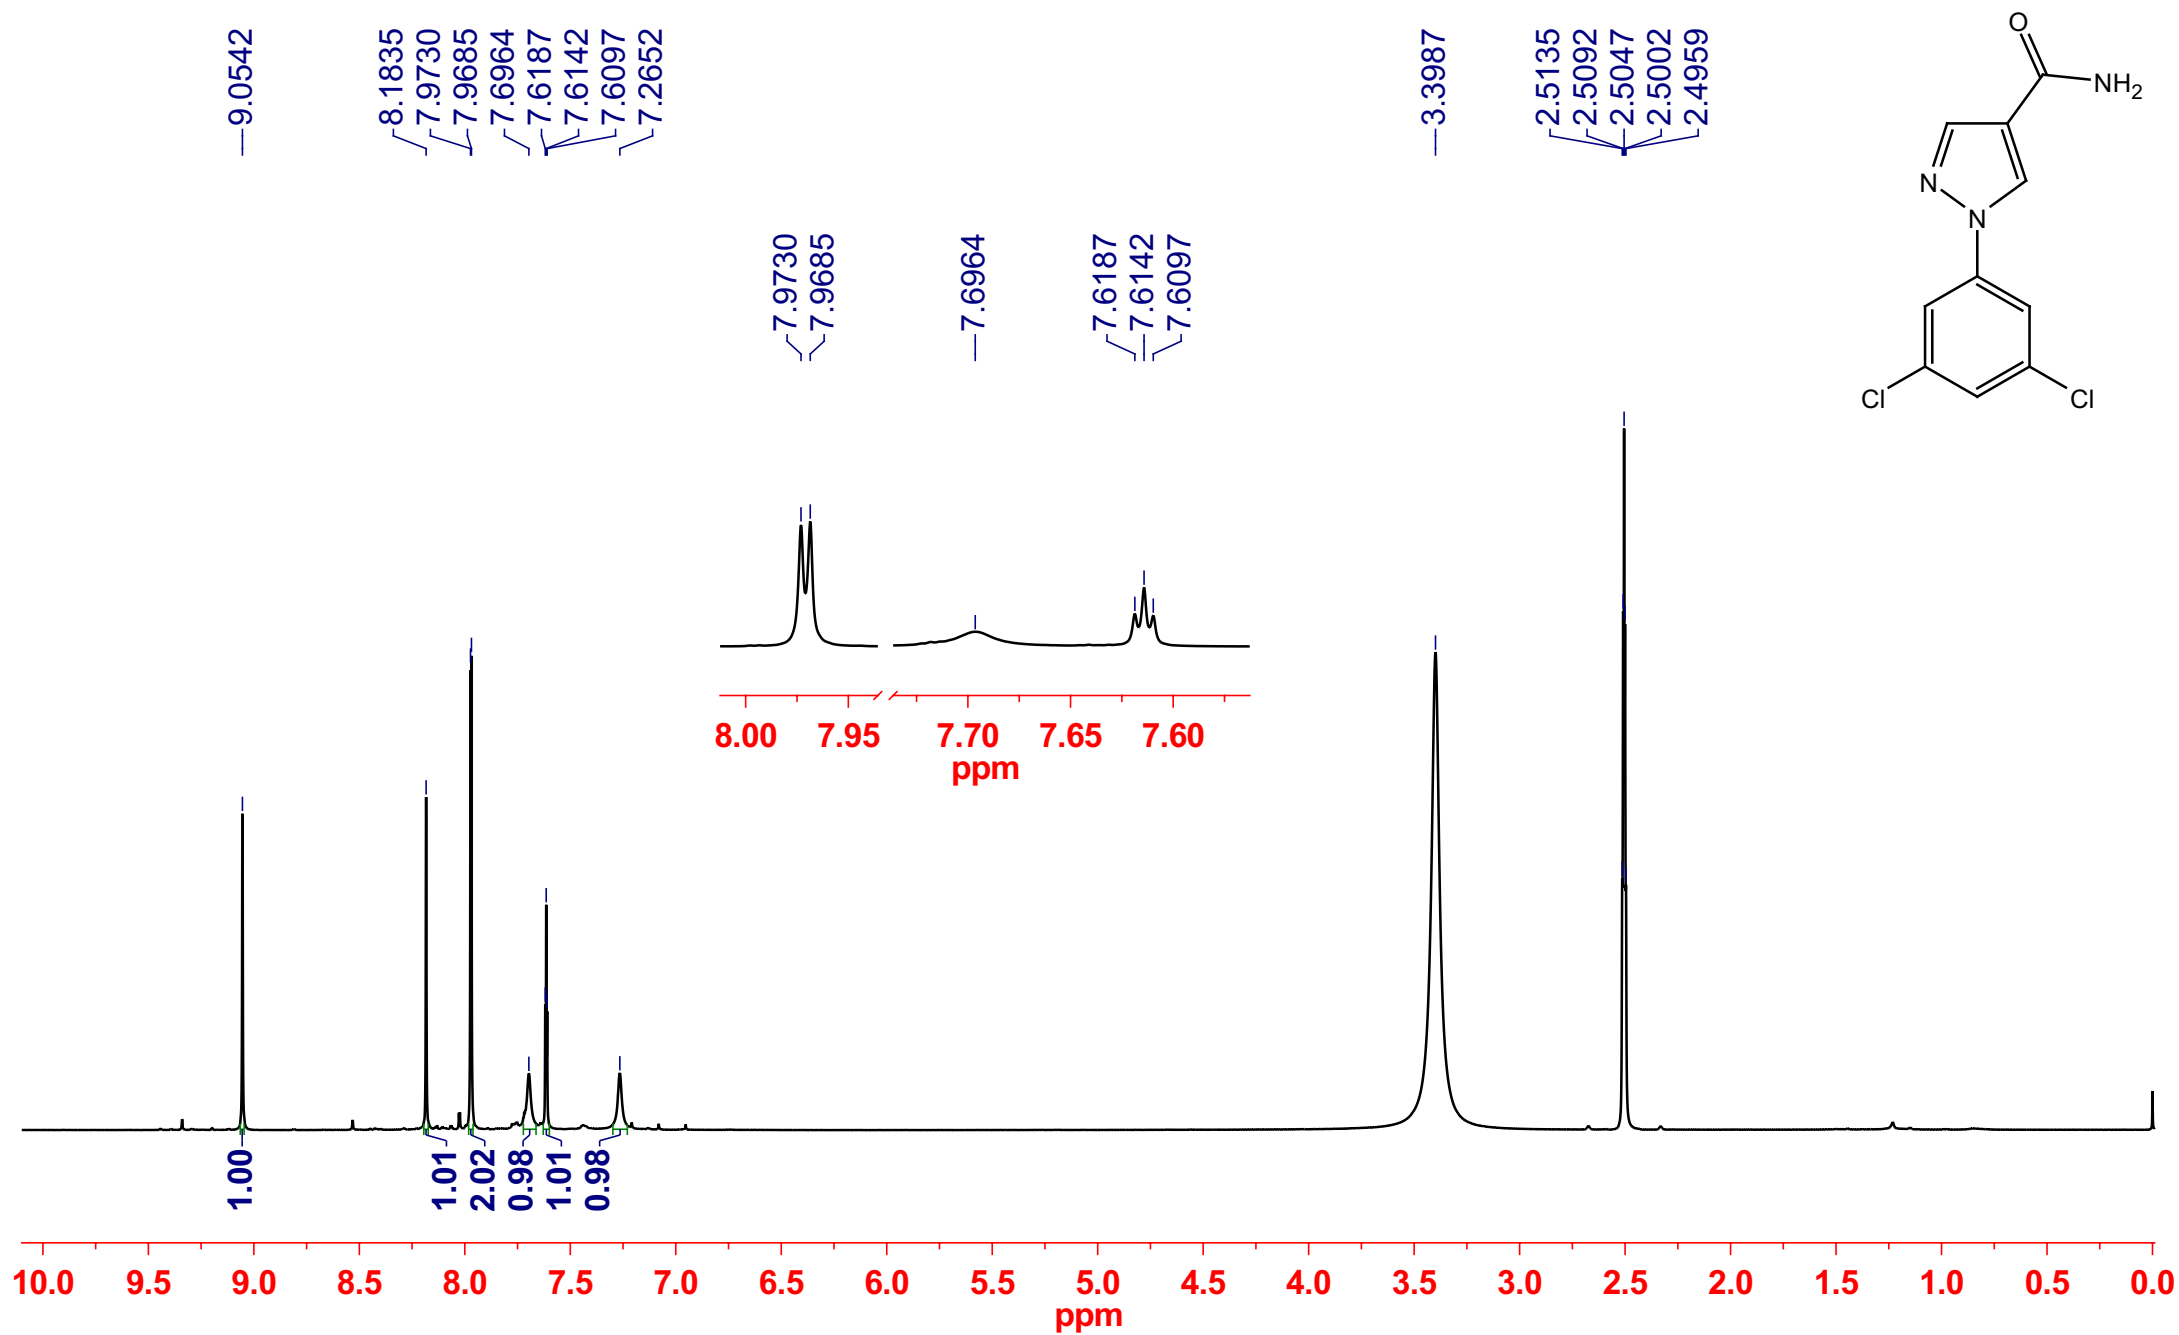

<sup>13</sup>C NMR of compound **1d**

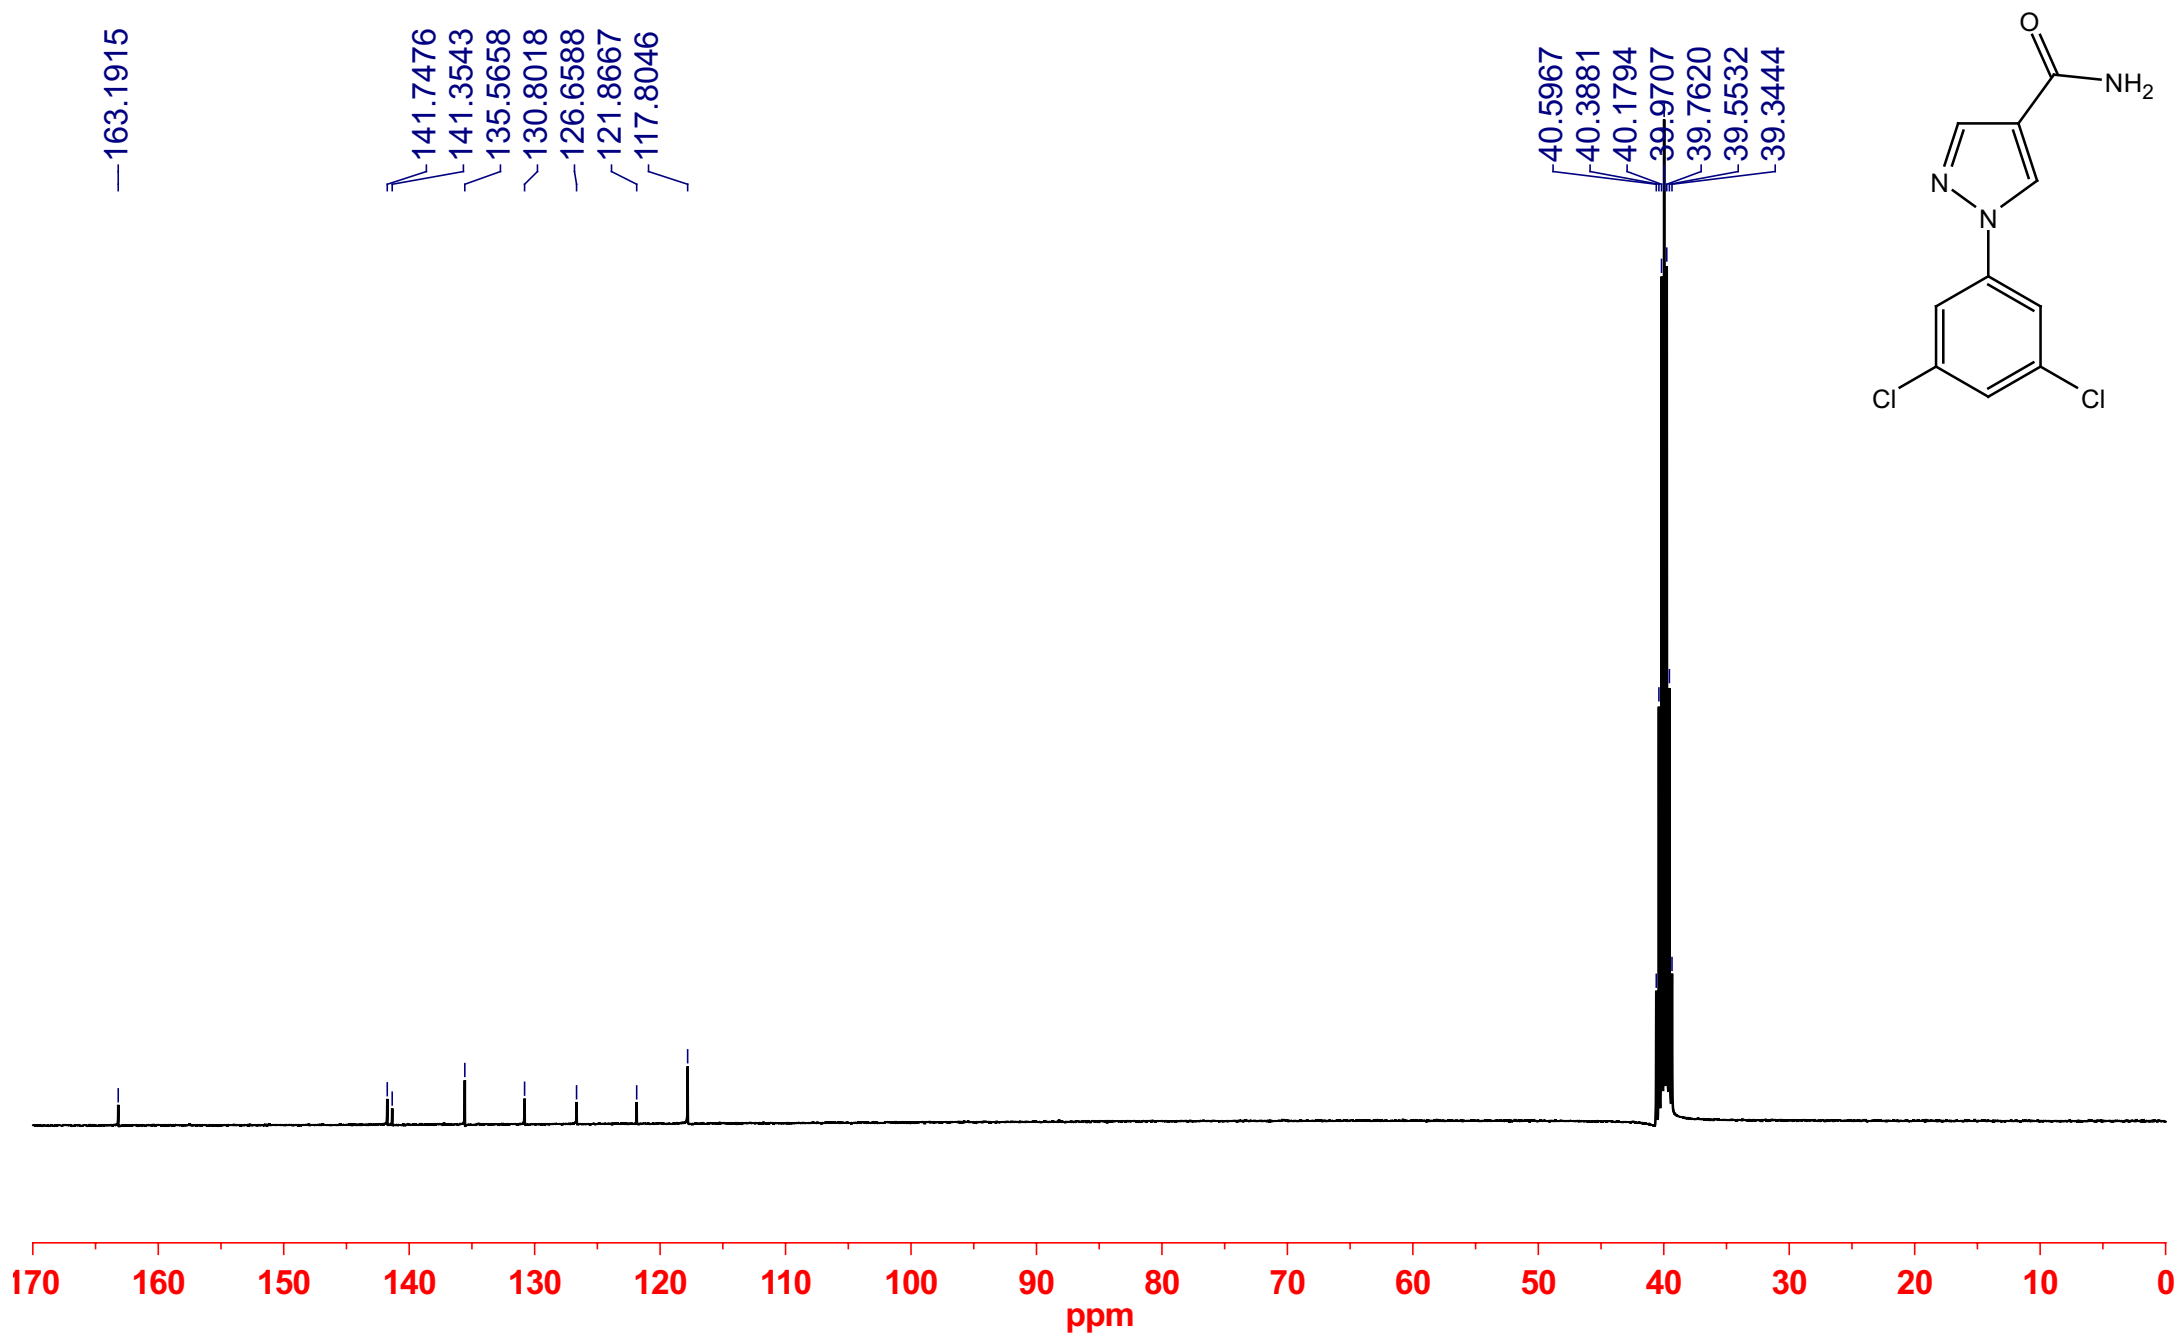

<sup>1</sup>H NMR of compound **1e**

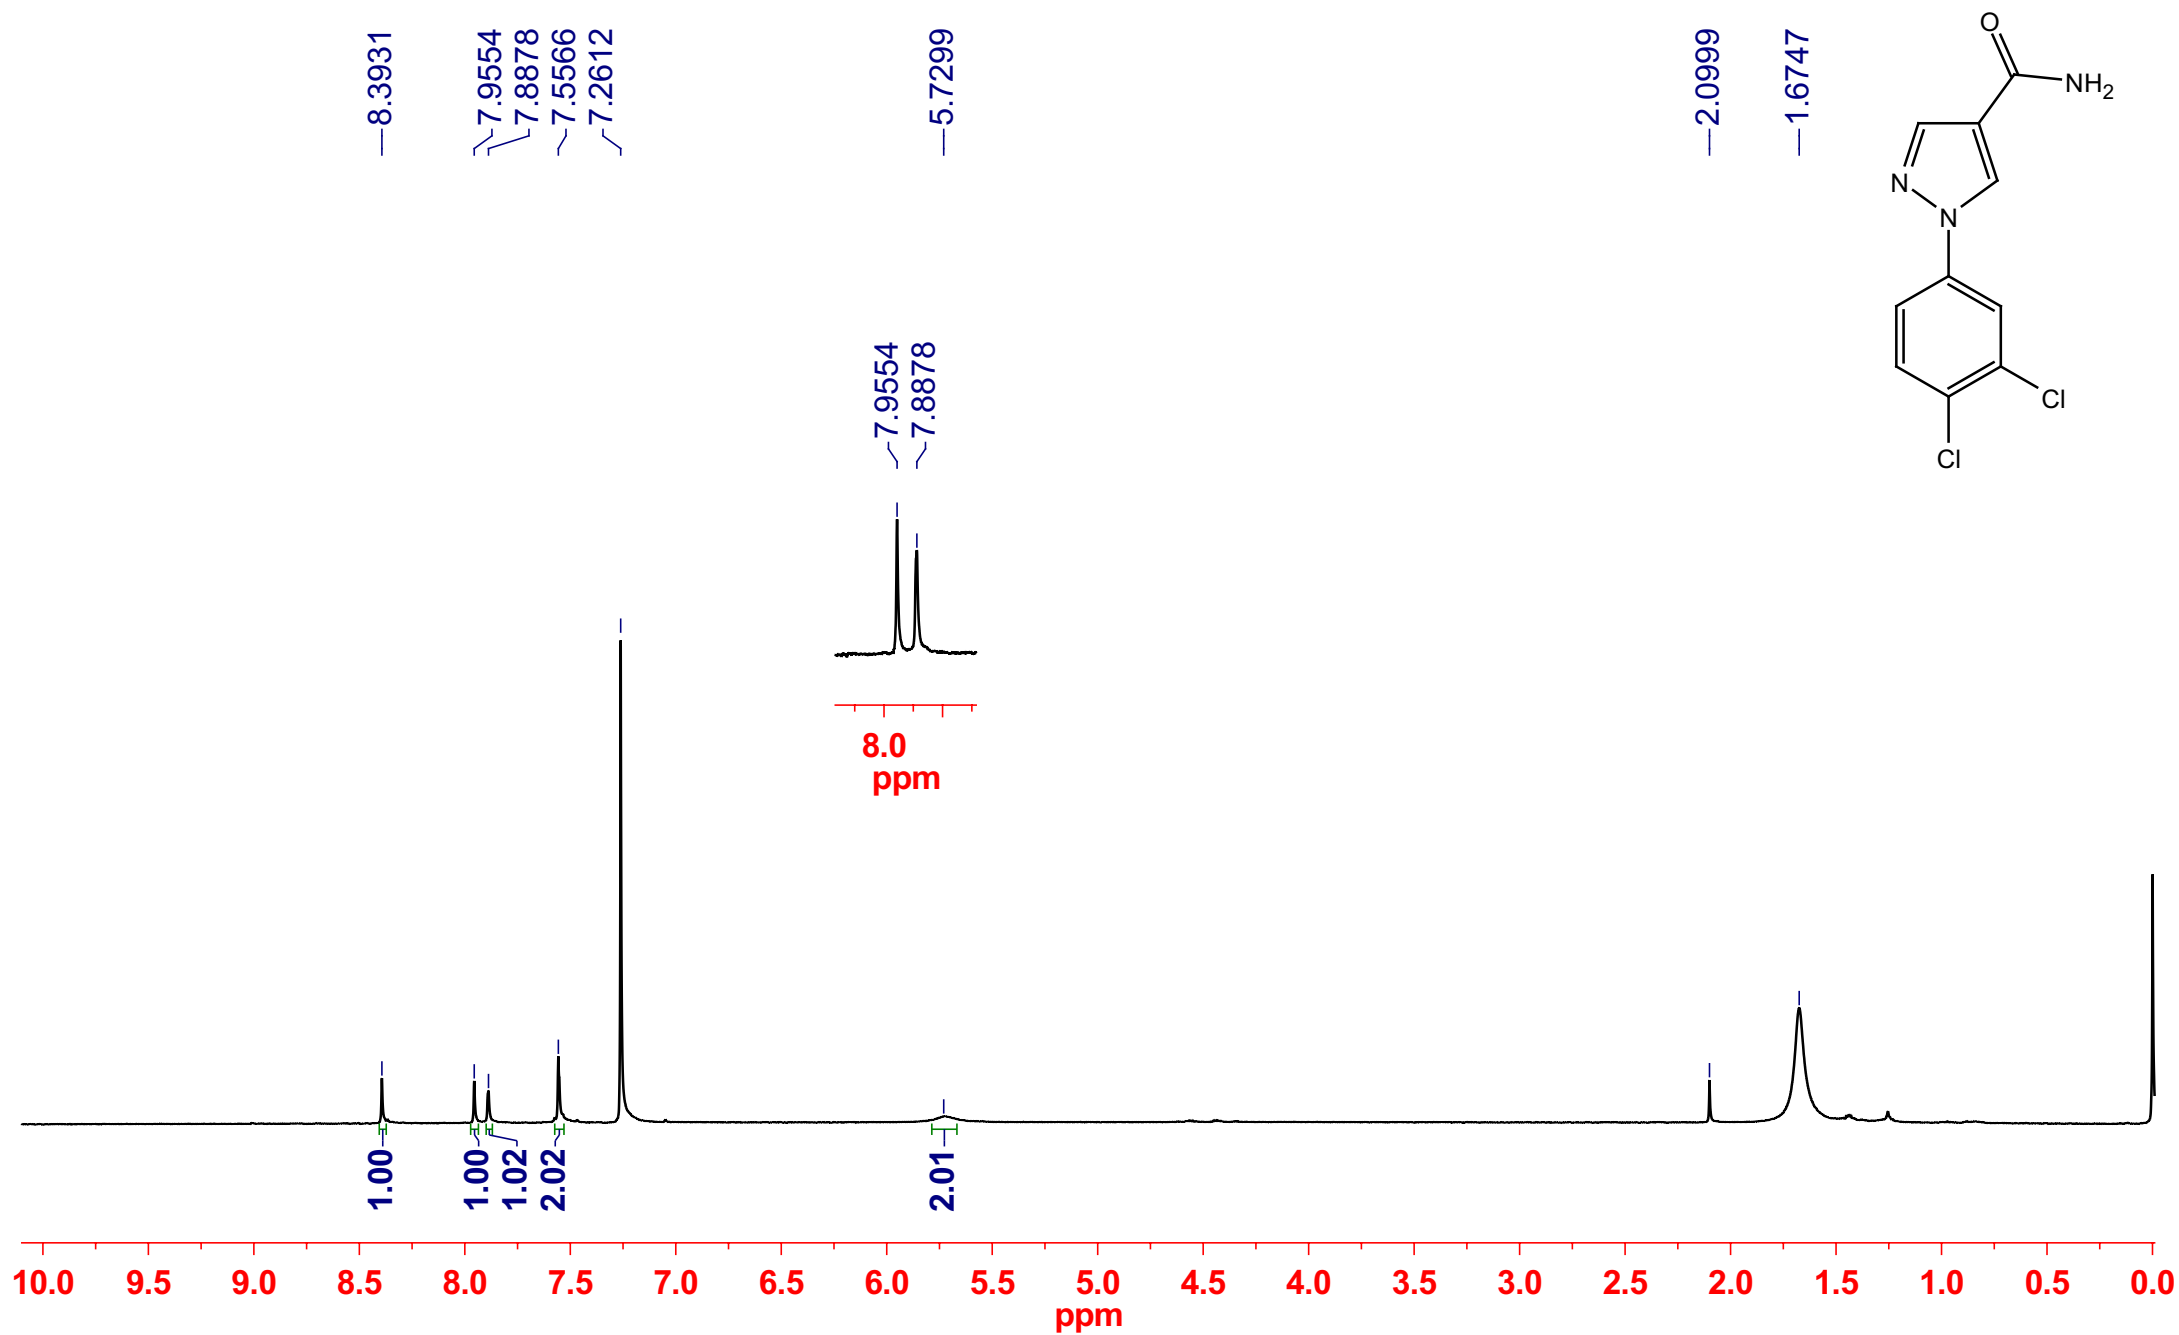

<sup>13</sup>C NMR of compound **1e**

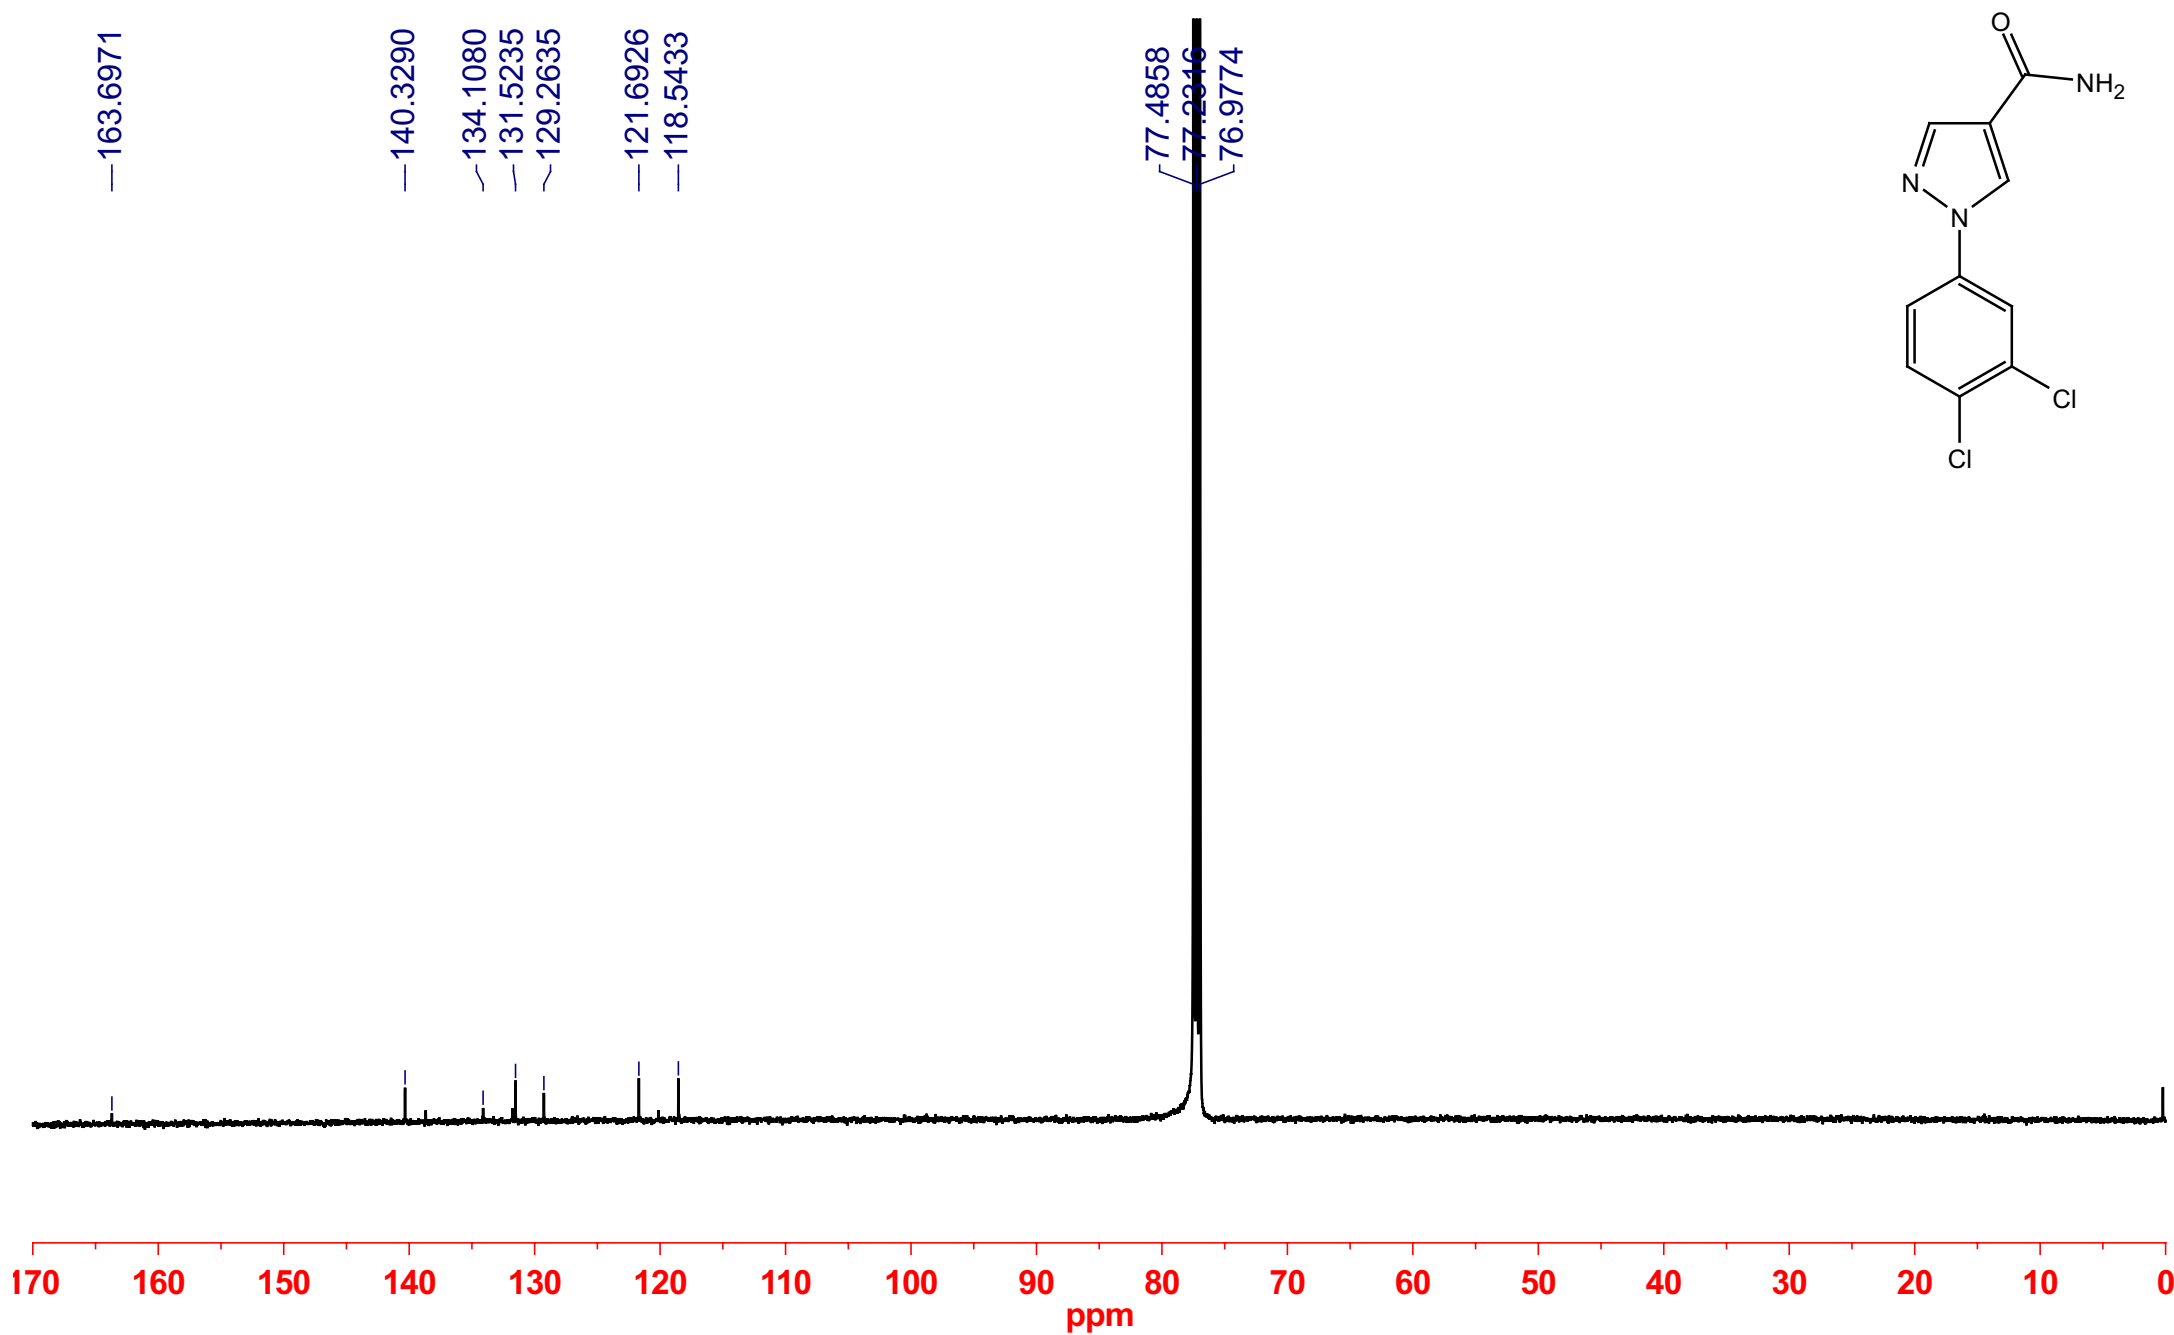

<sup>1</sup>H NMR of compound **1f**

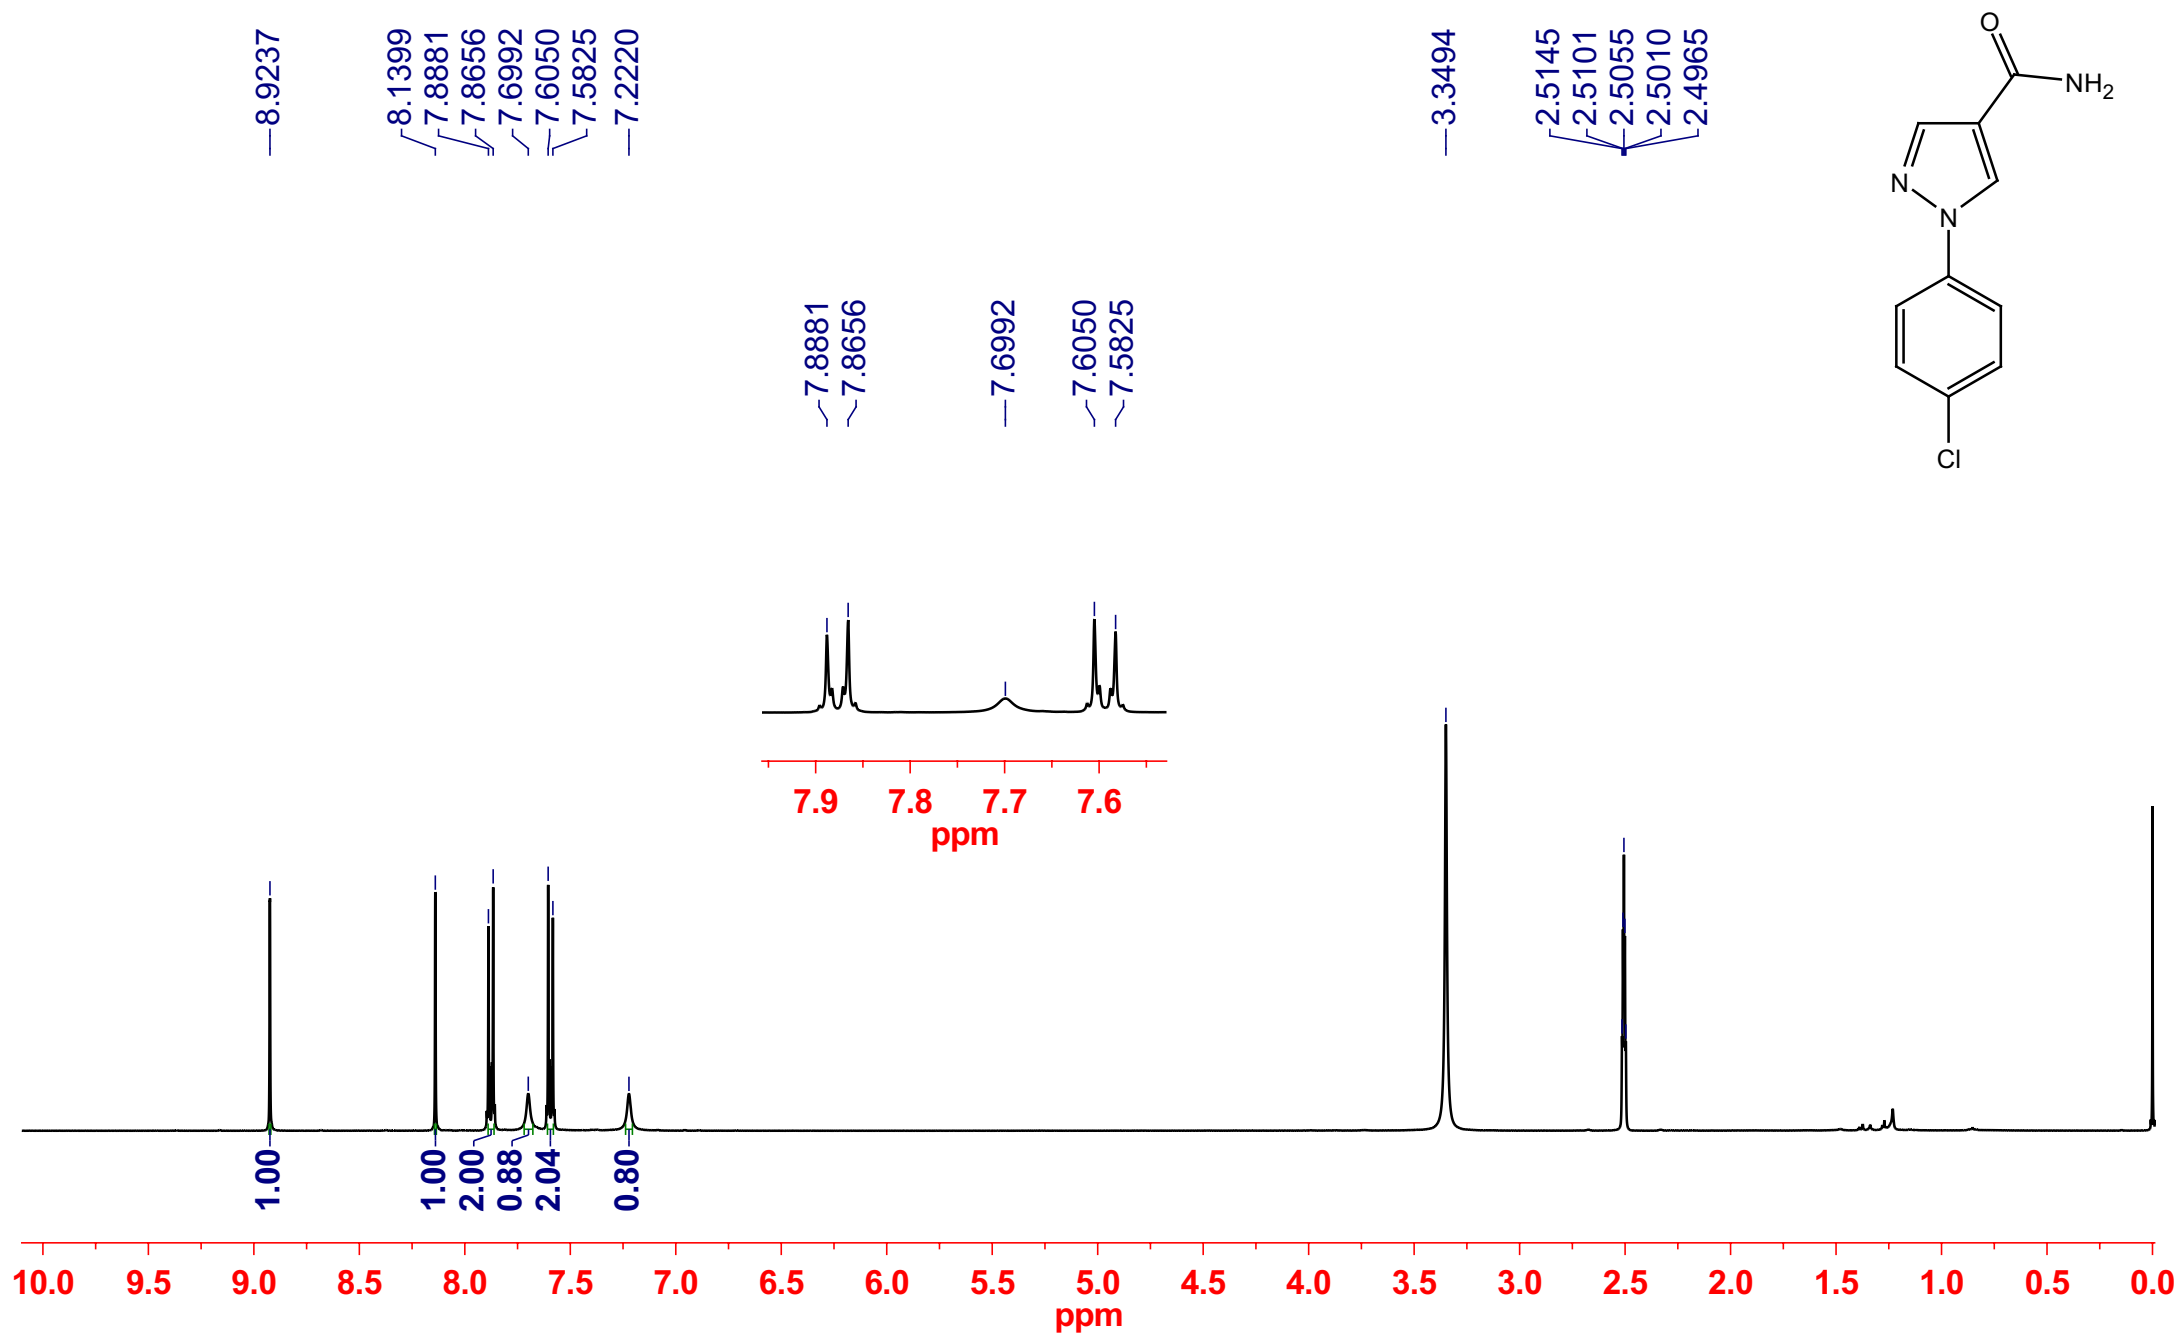

<sup>13</sup>C NMR of compound **1f**

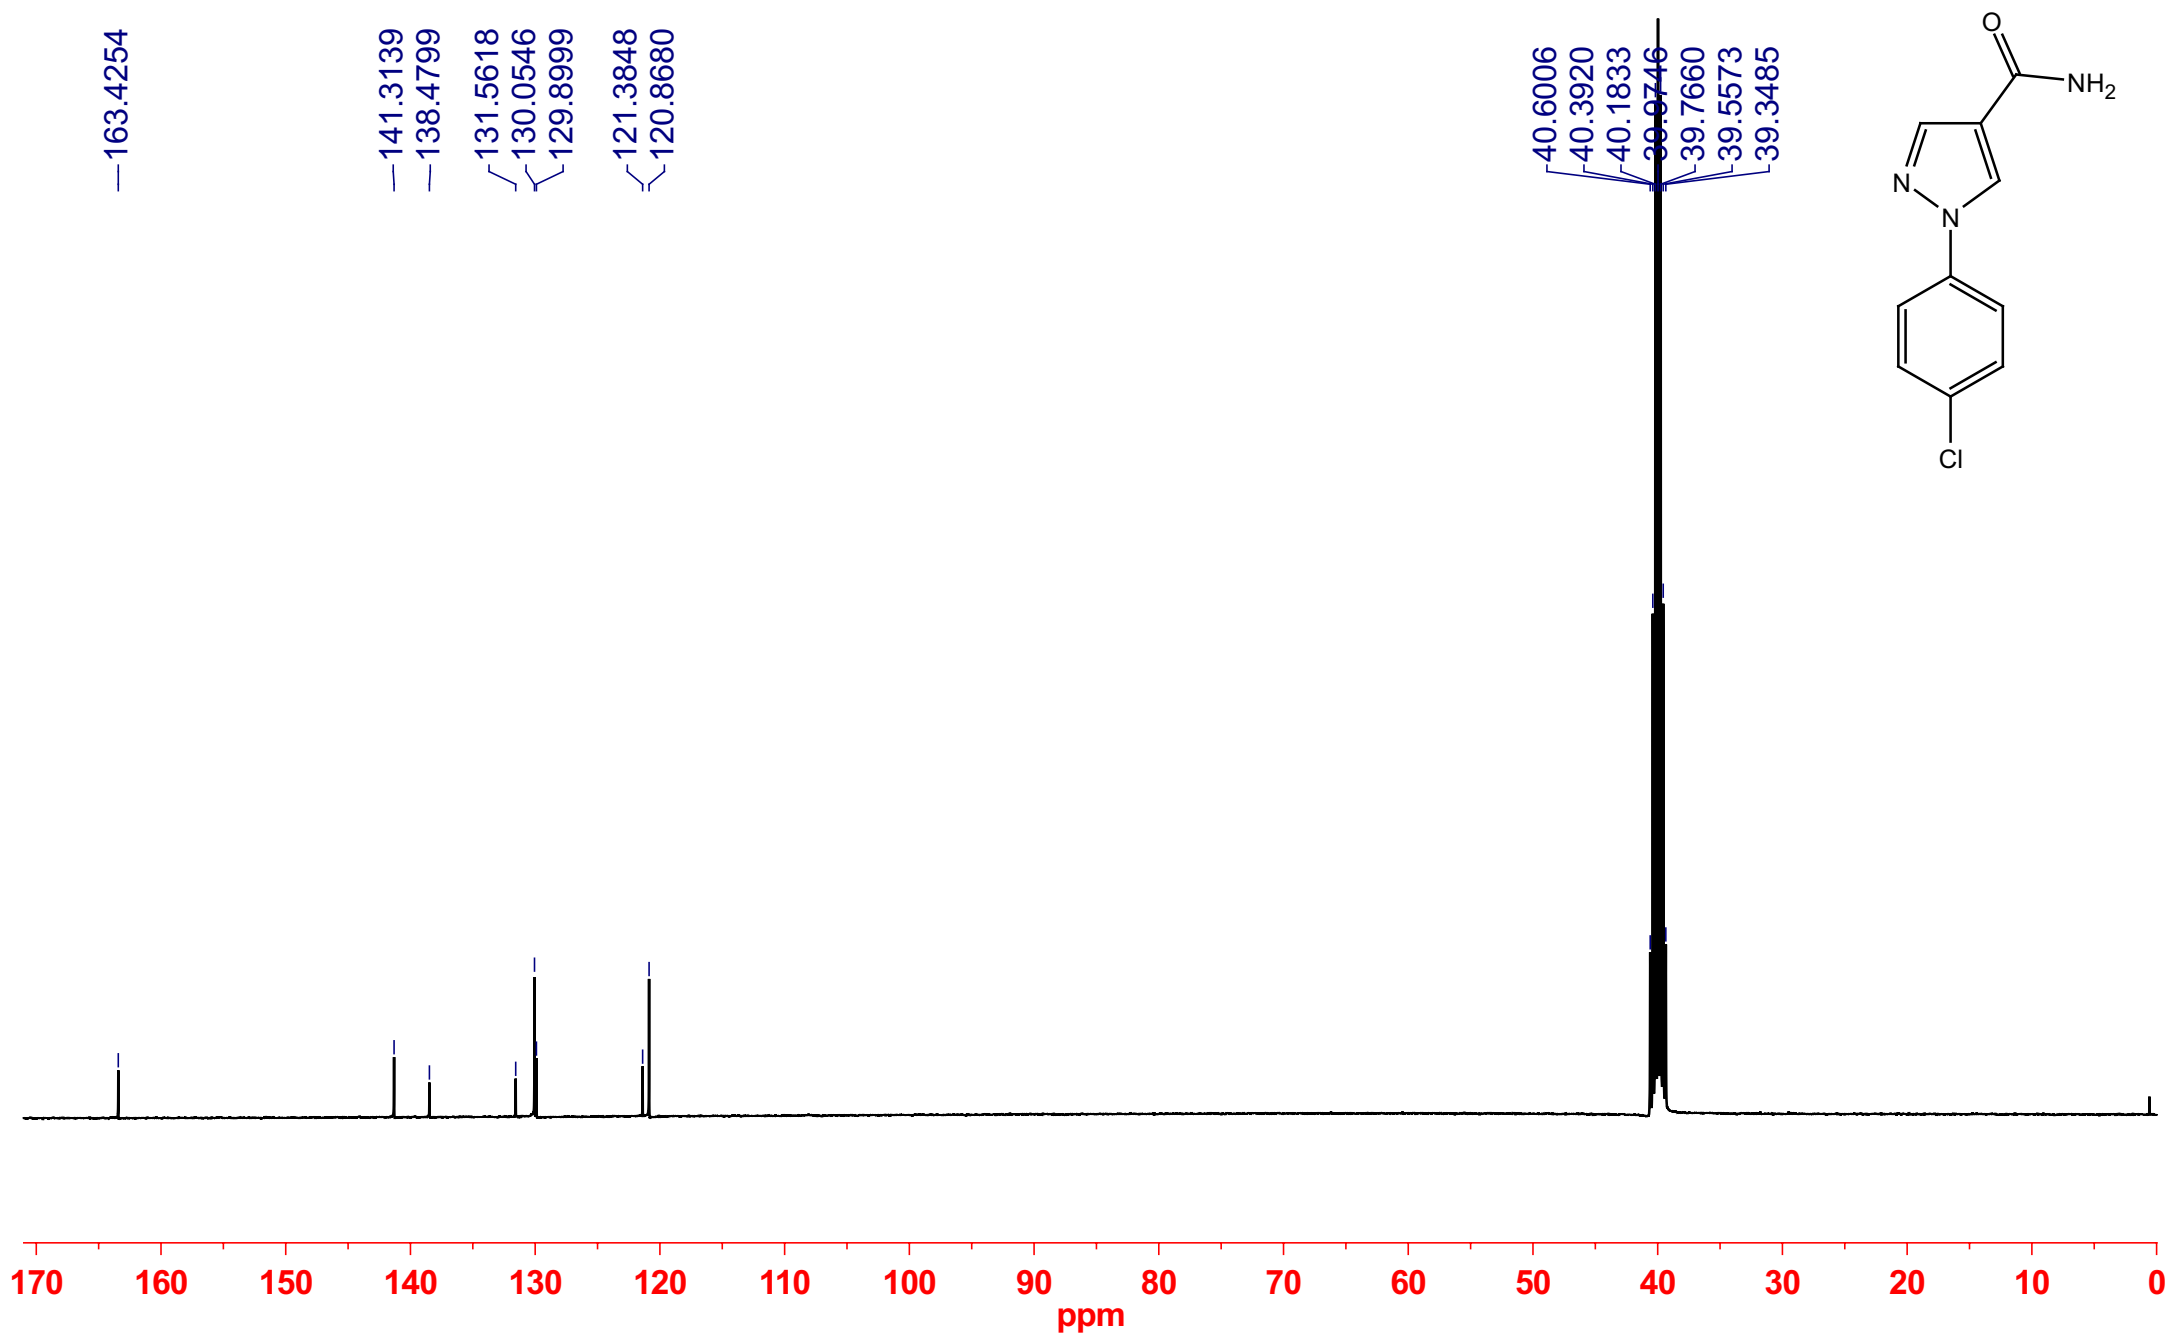



<sup>1</sup>H NMR of compound **1g**

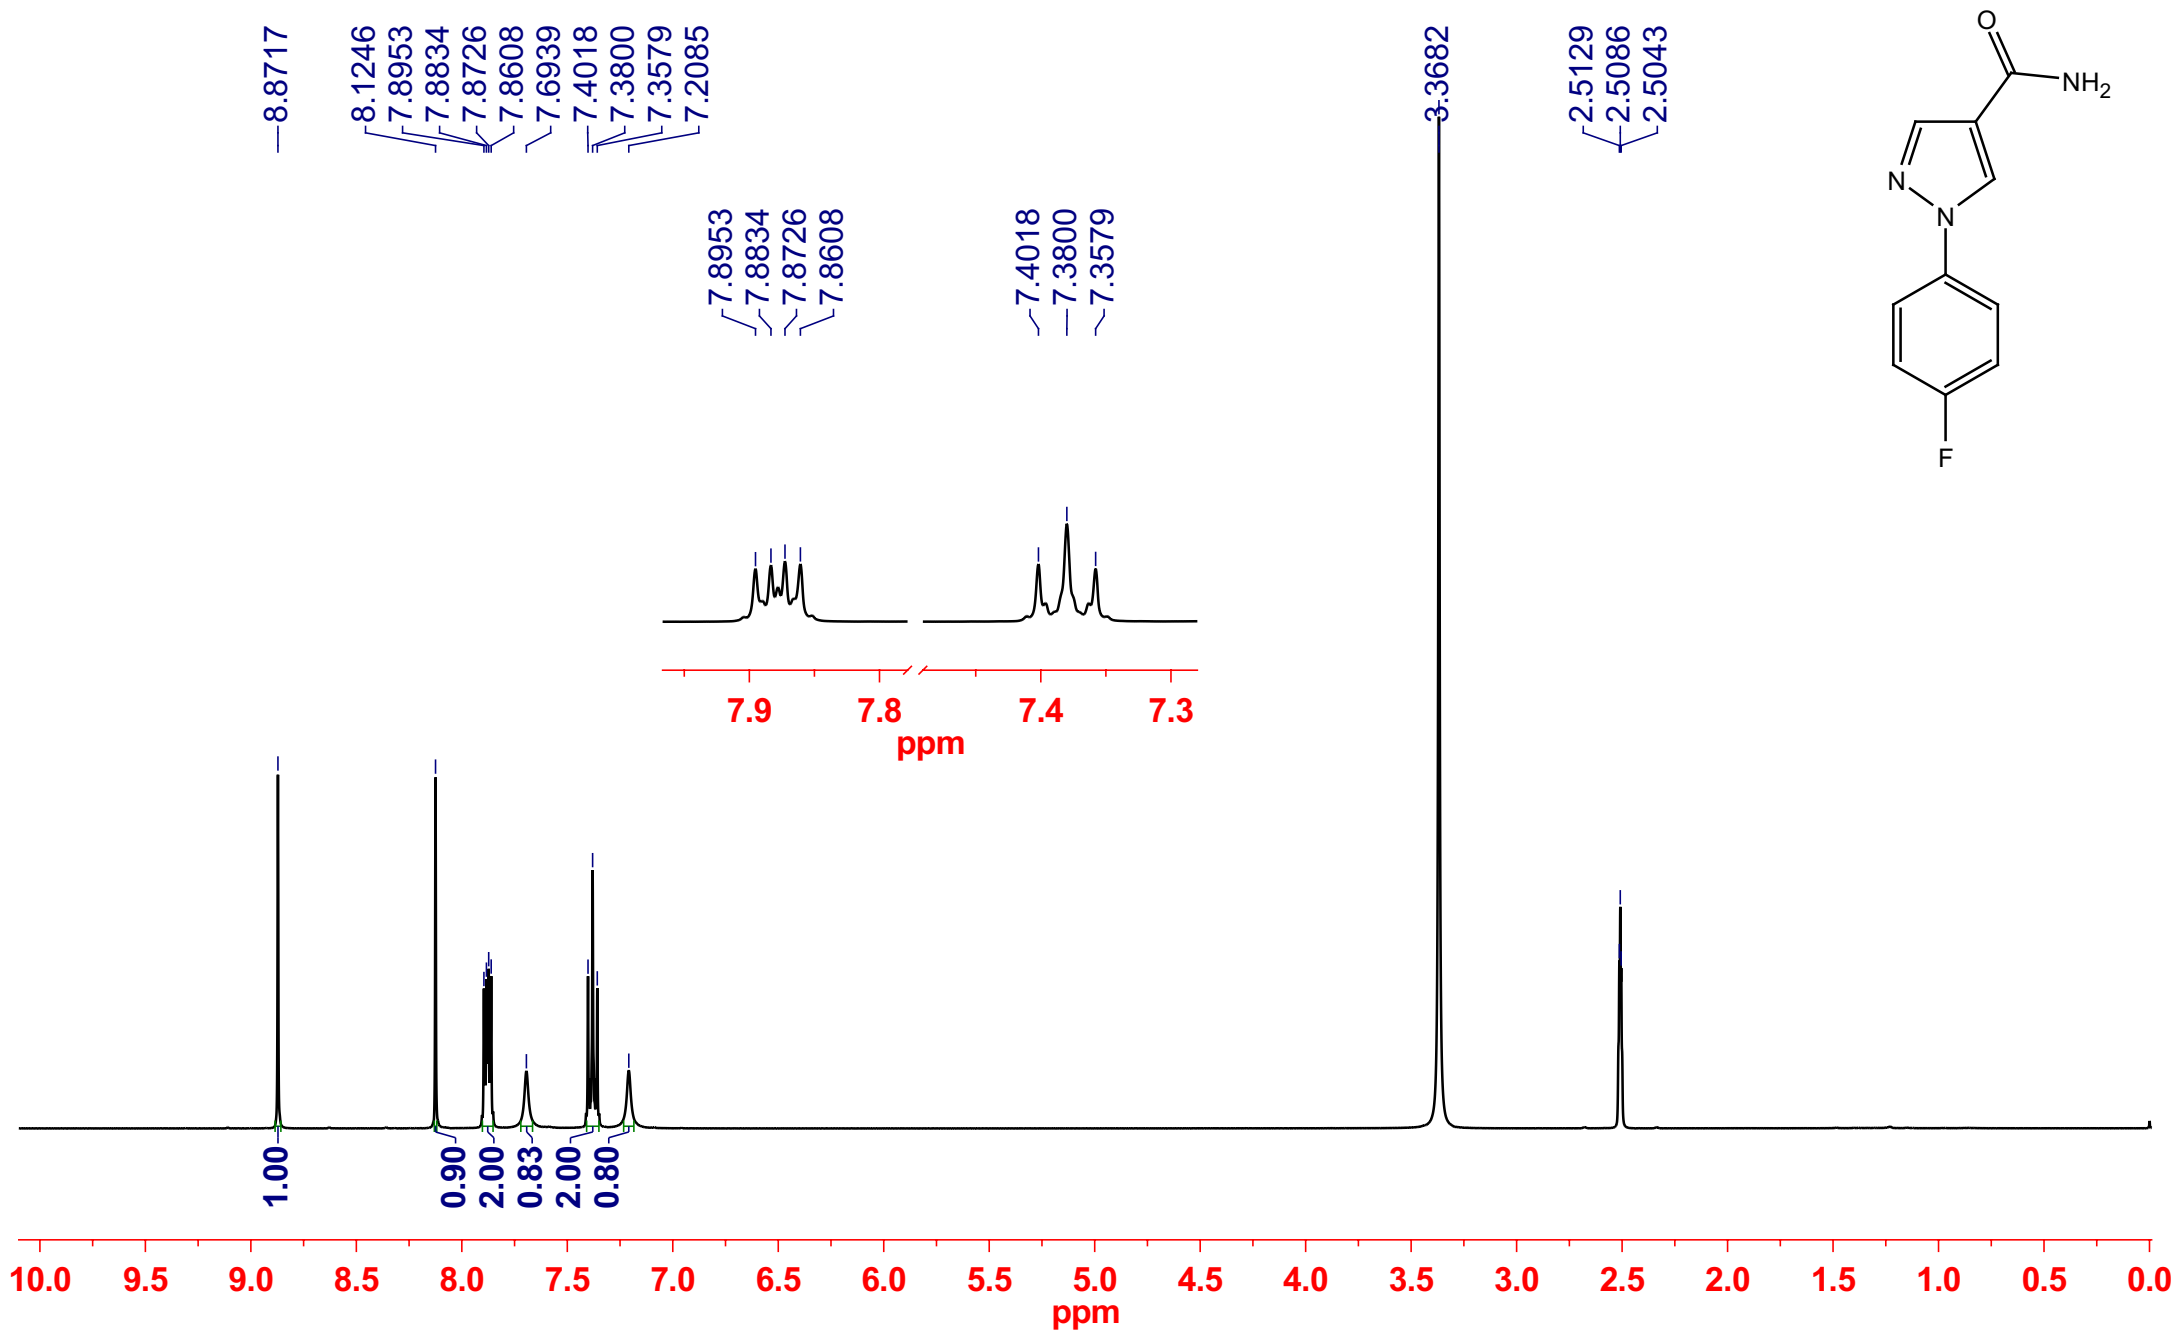

<sup>13</sup>C NMR of compound **1g**

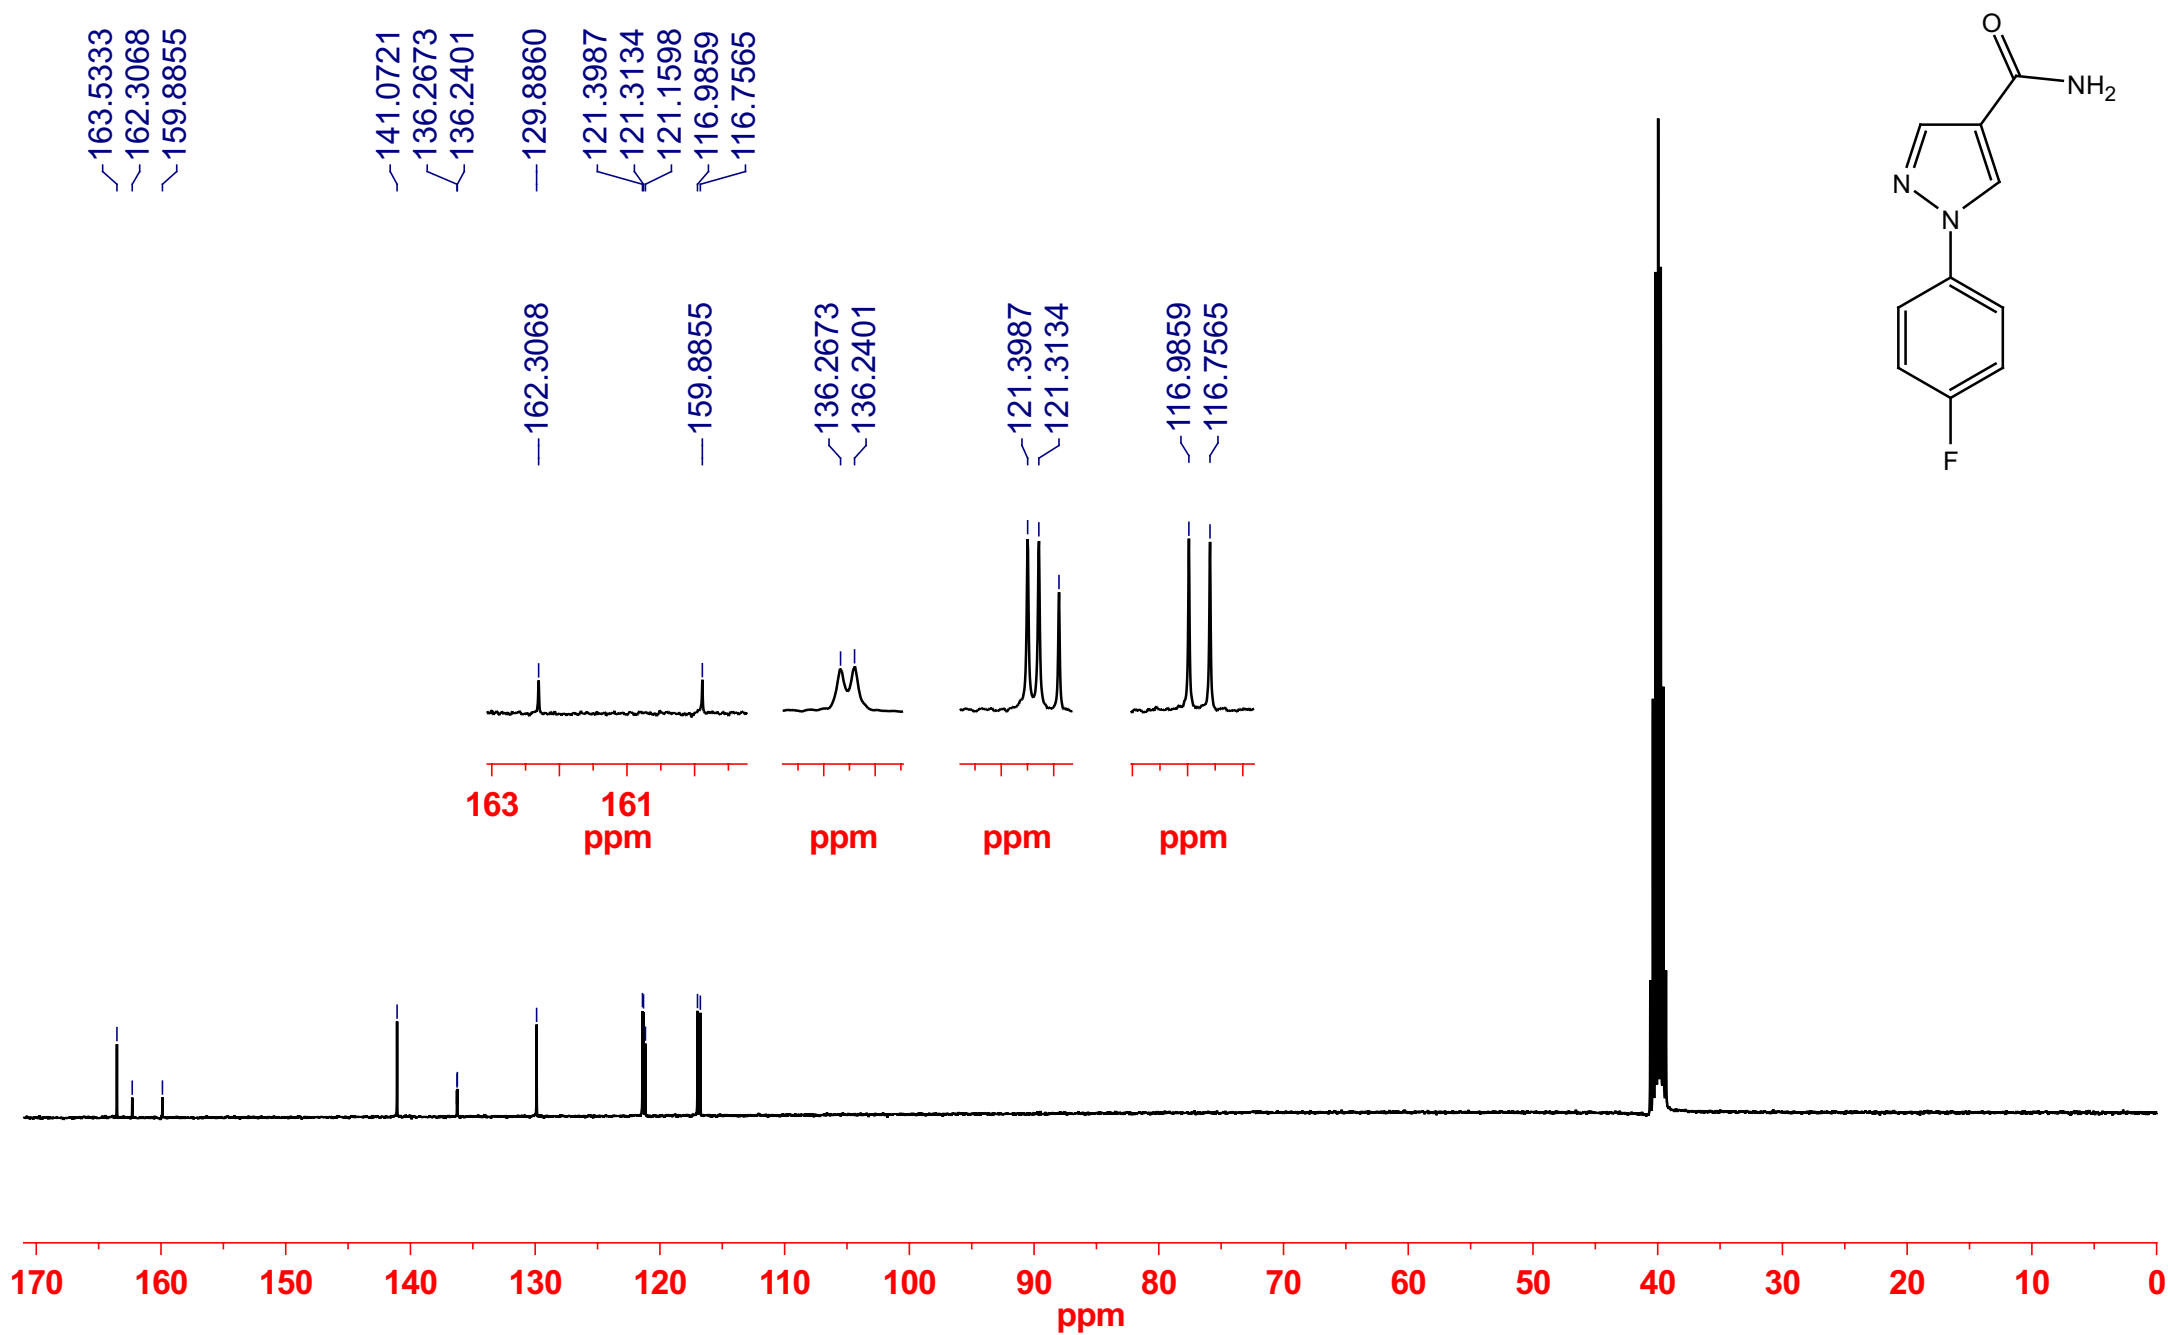

<sup>1</sup>H NMR of compound **1h**

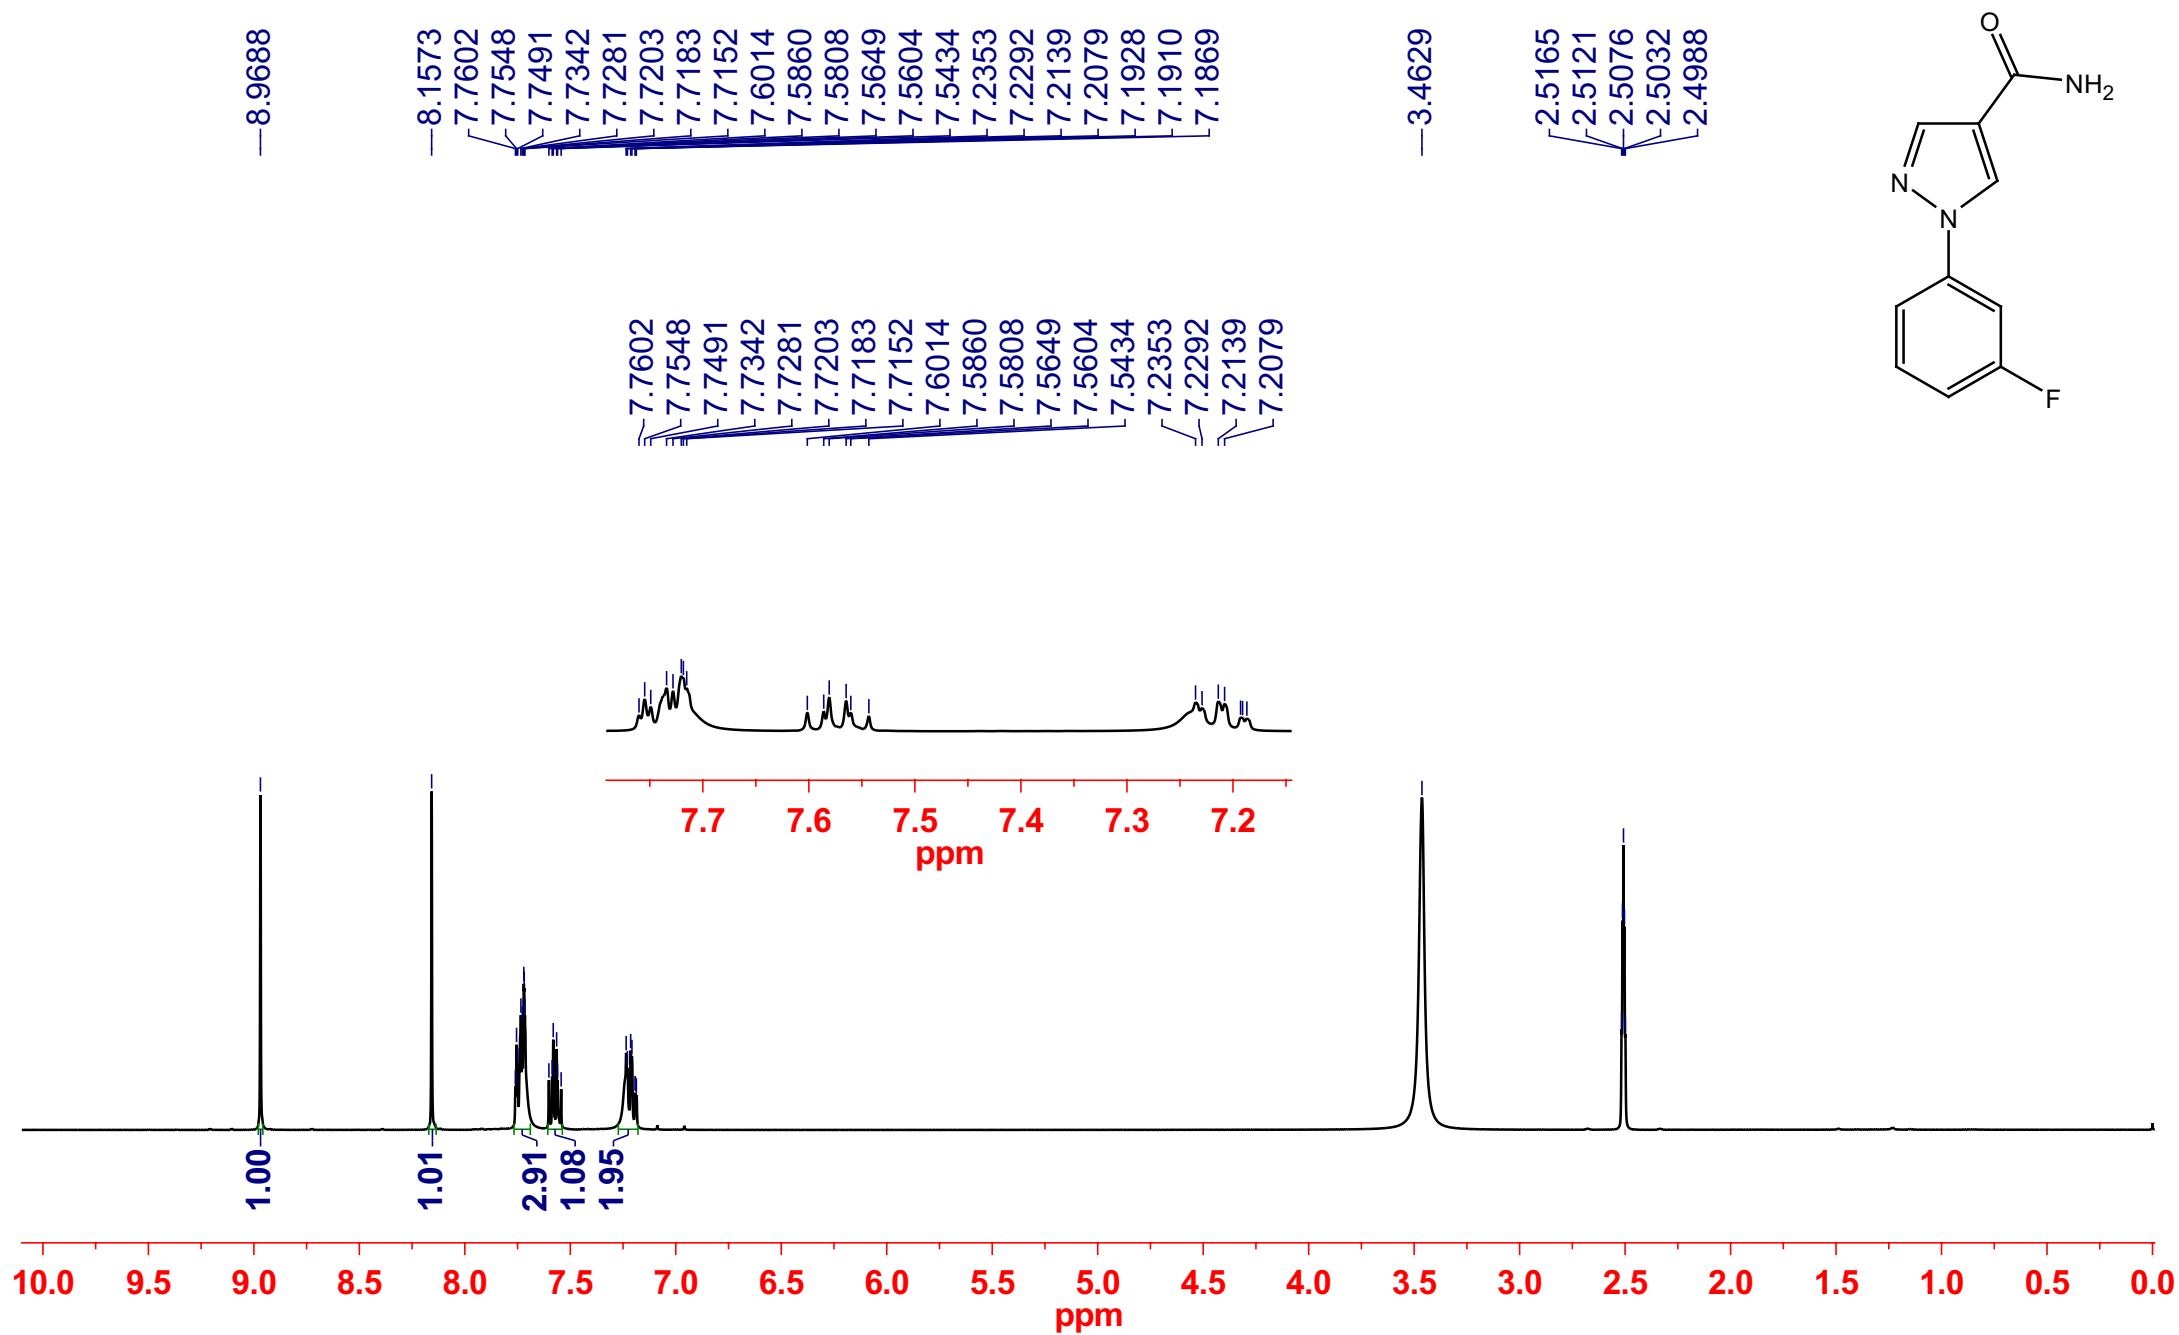

<sup>13</sup>C NMR of compound **1h**

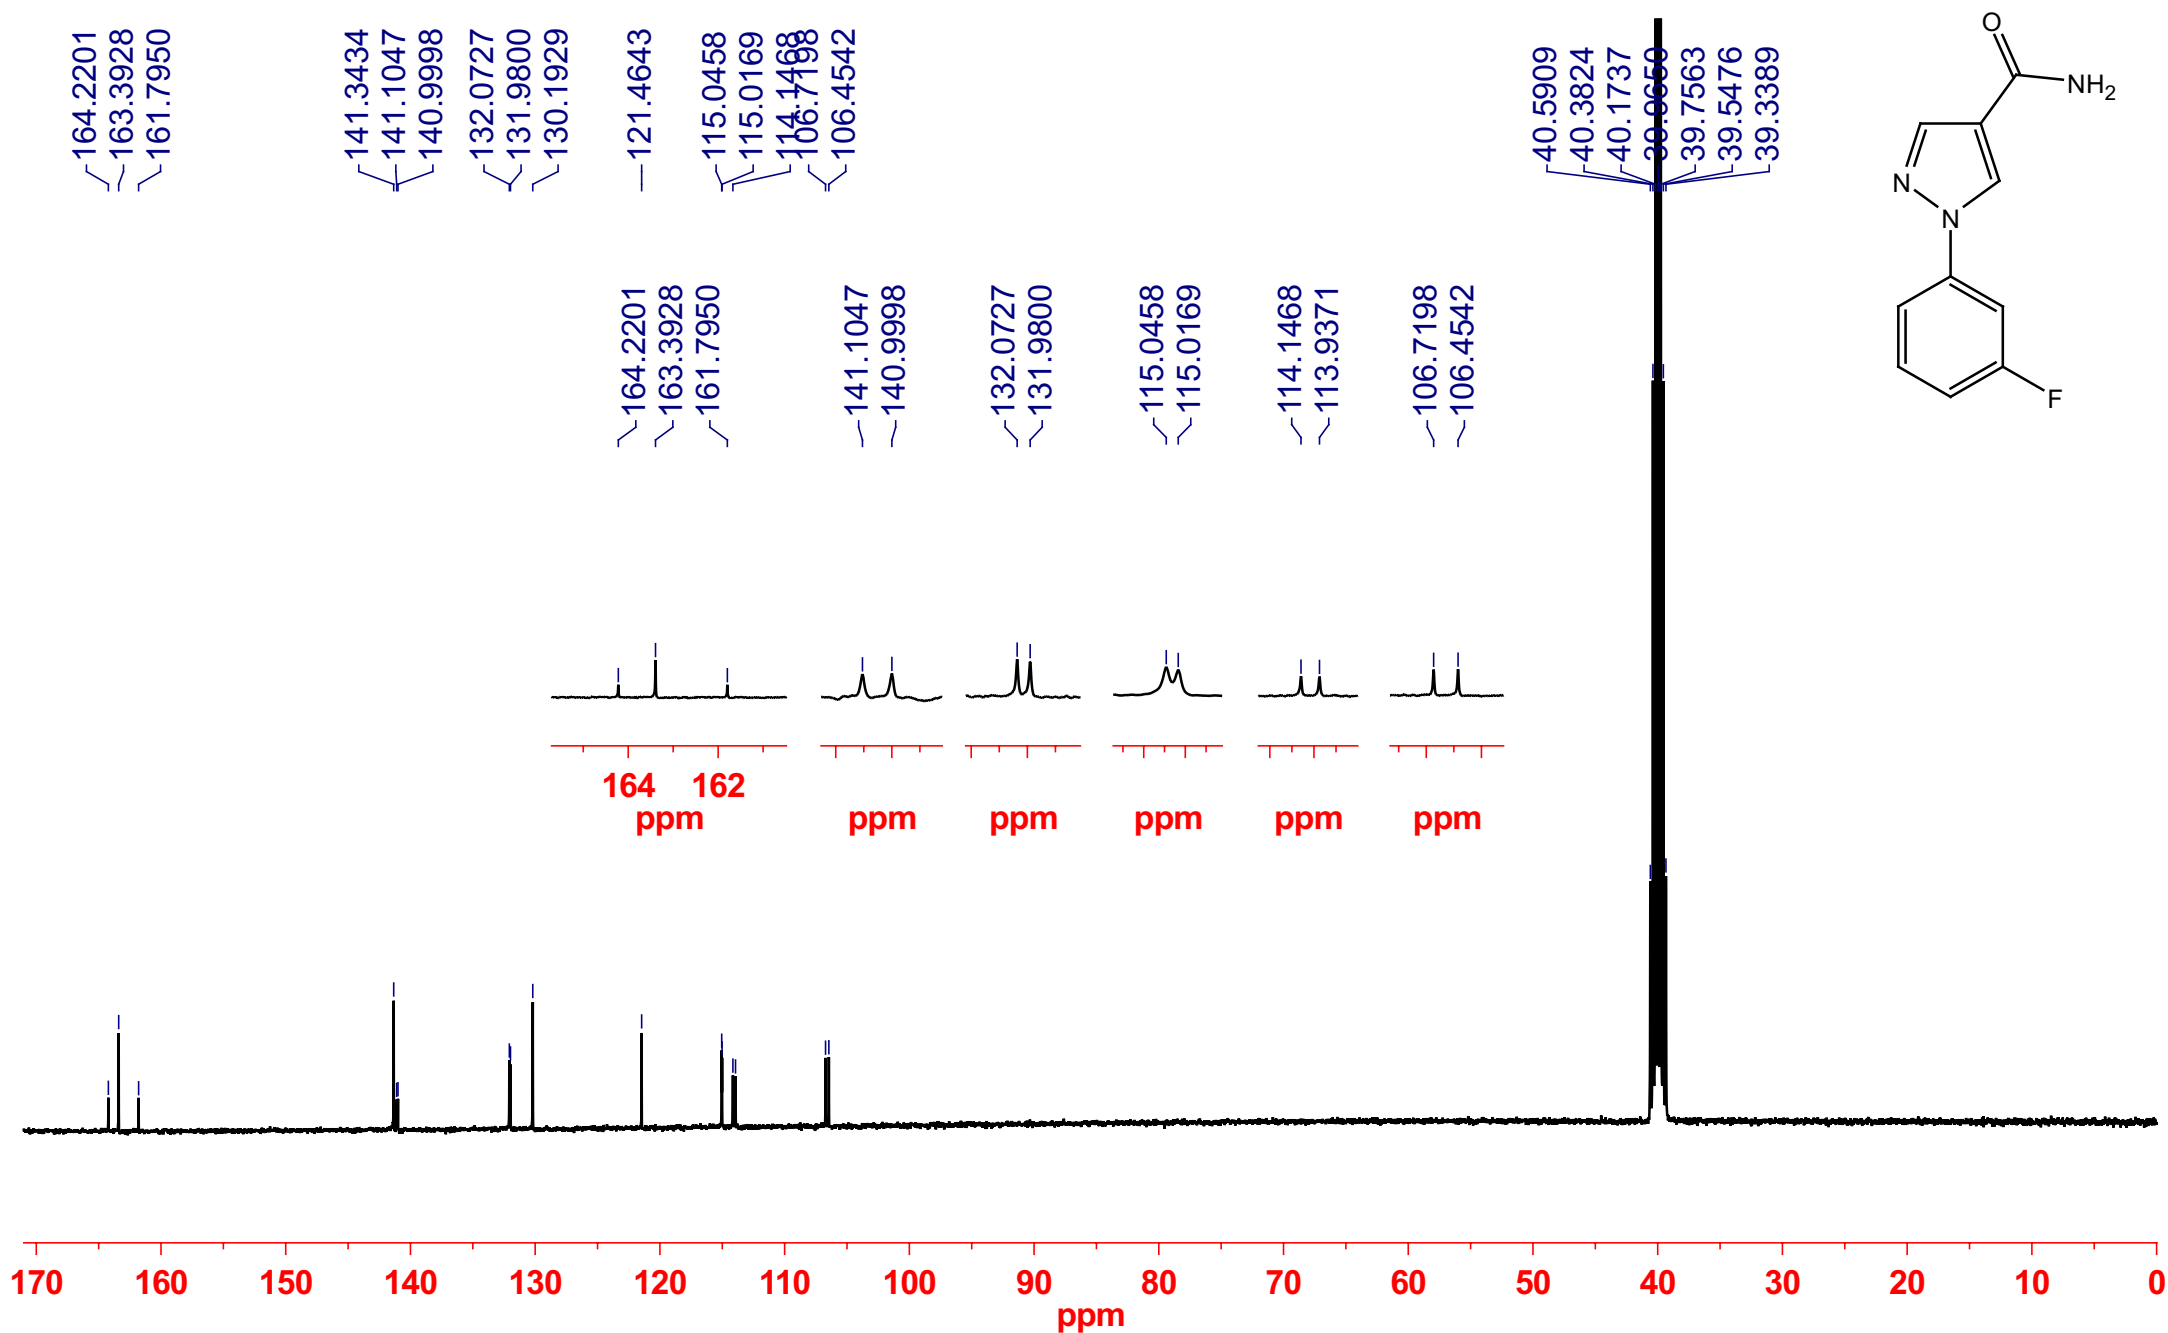

<sup>1</sup>H NMR of compound **1i**

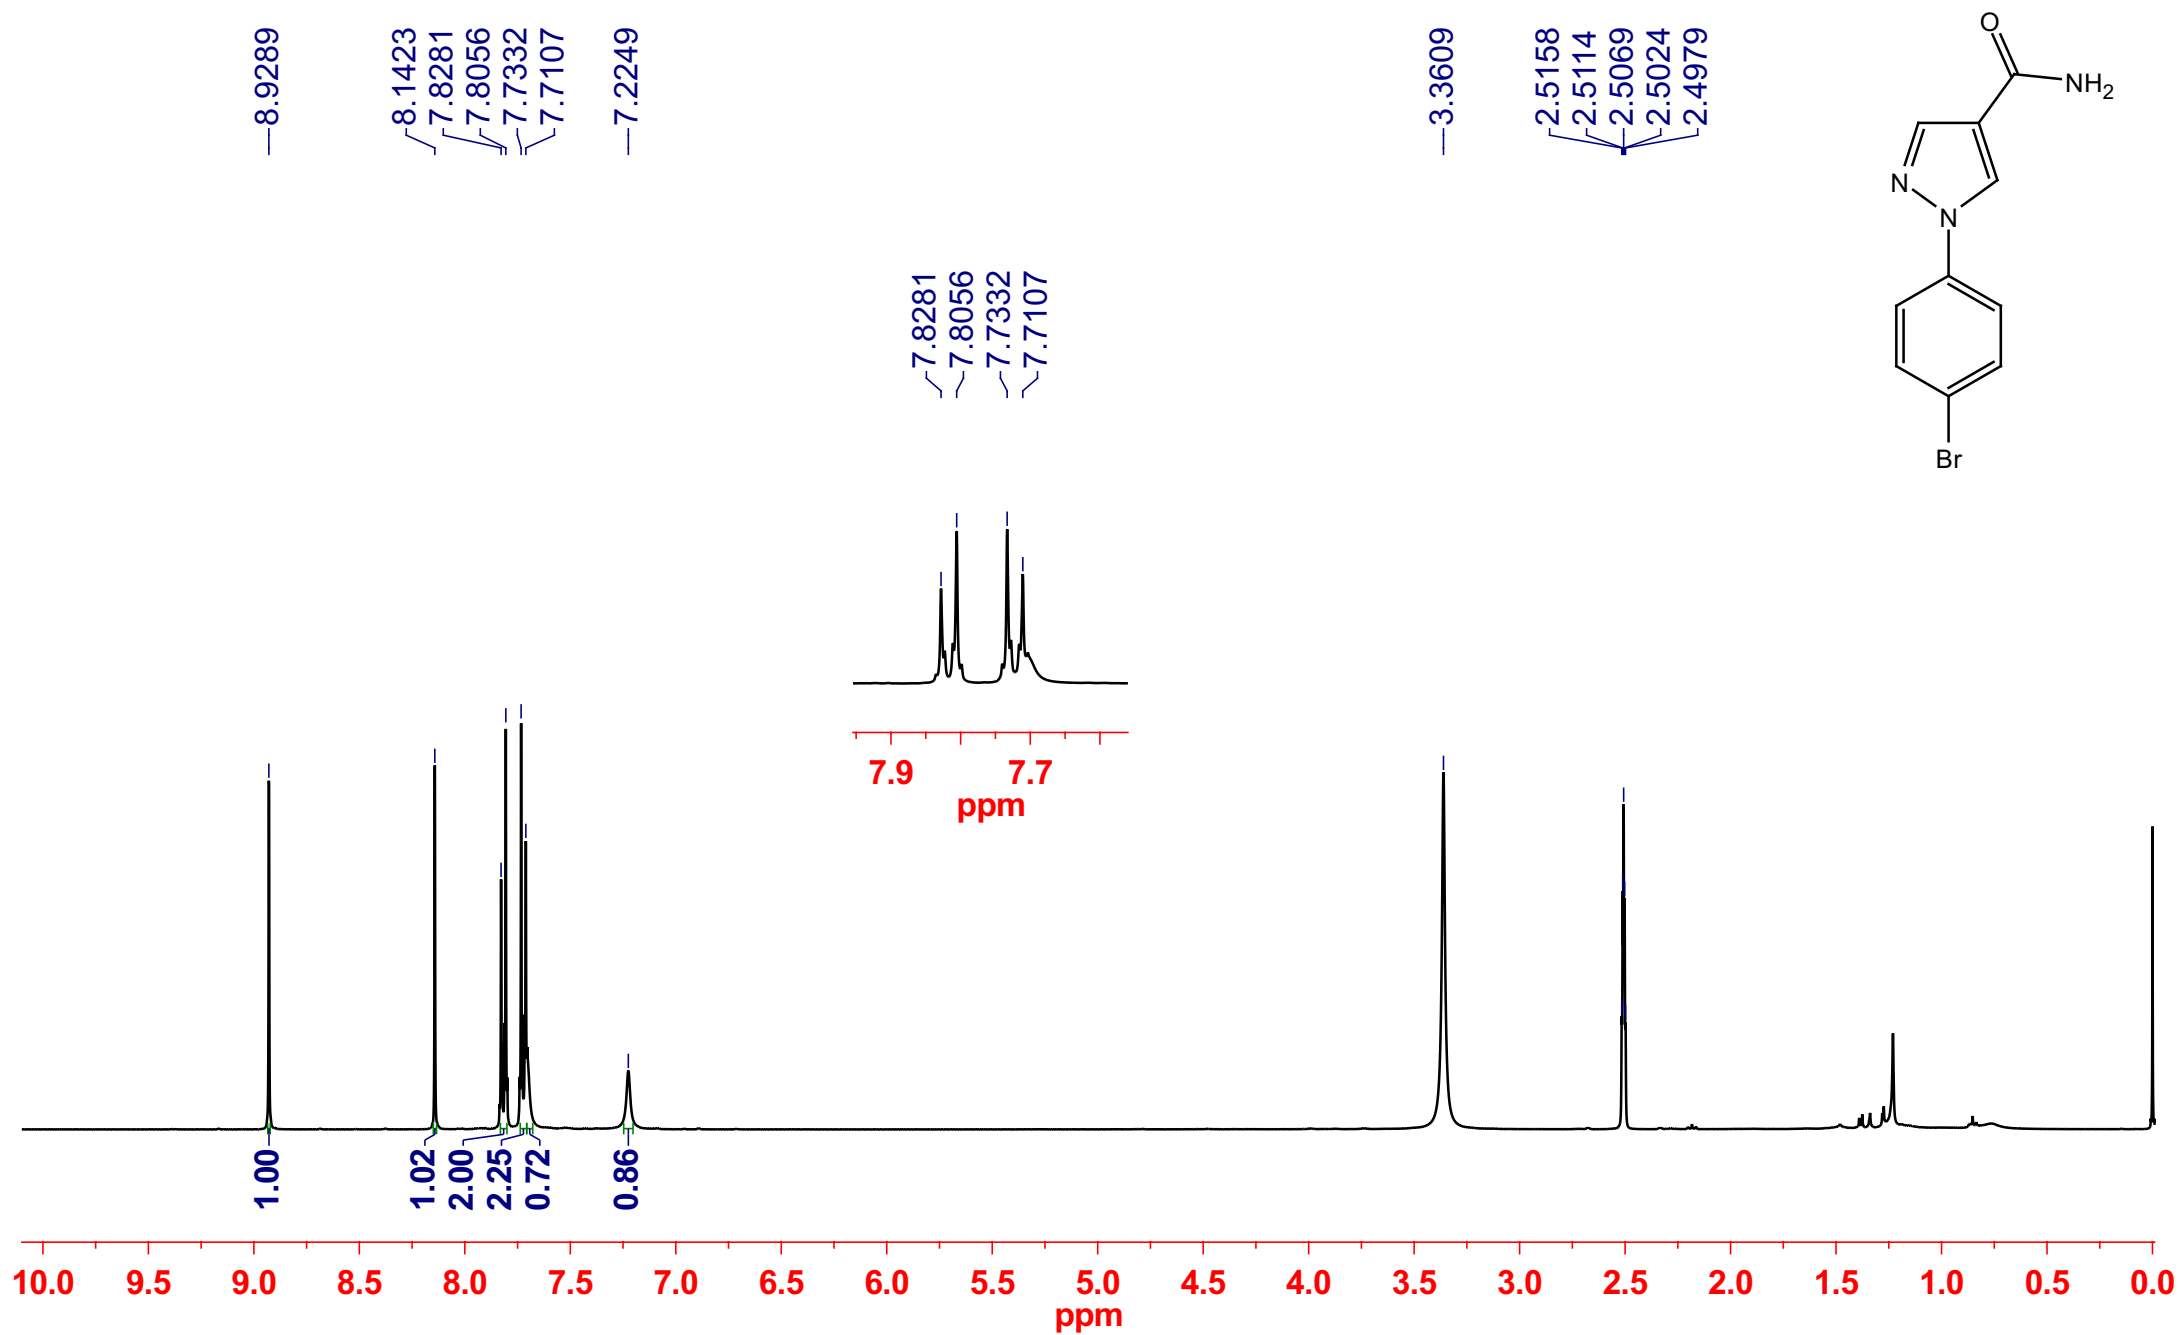

$^{13}\text{C}$  NMR of compound **1i**

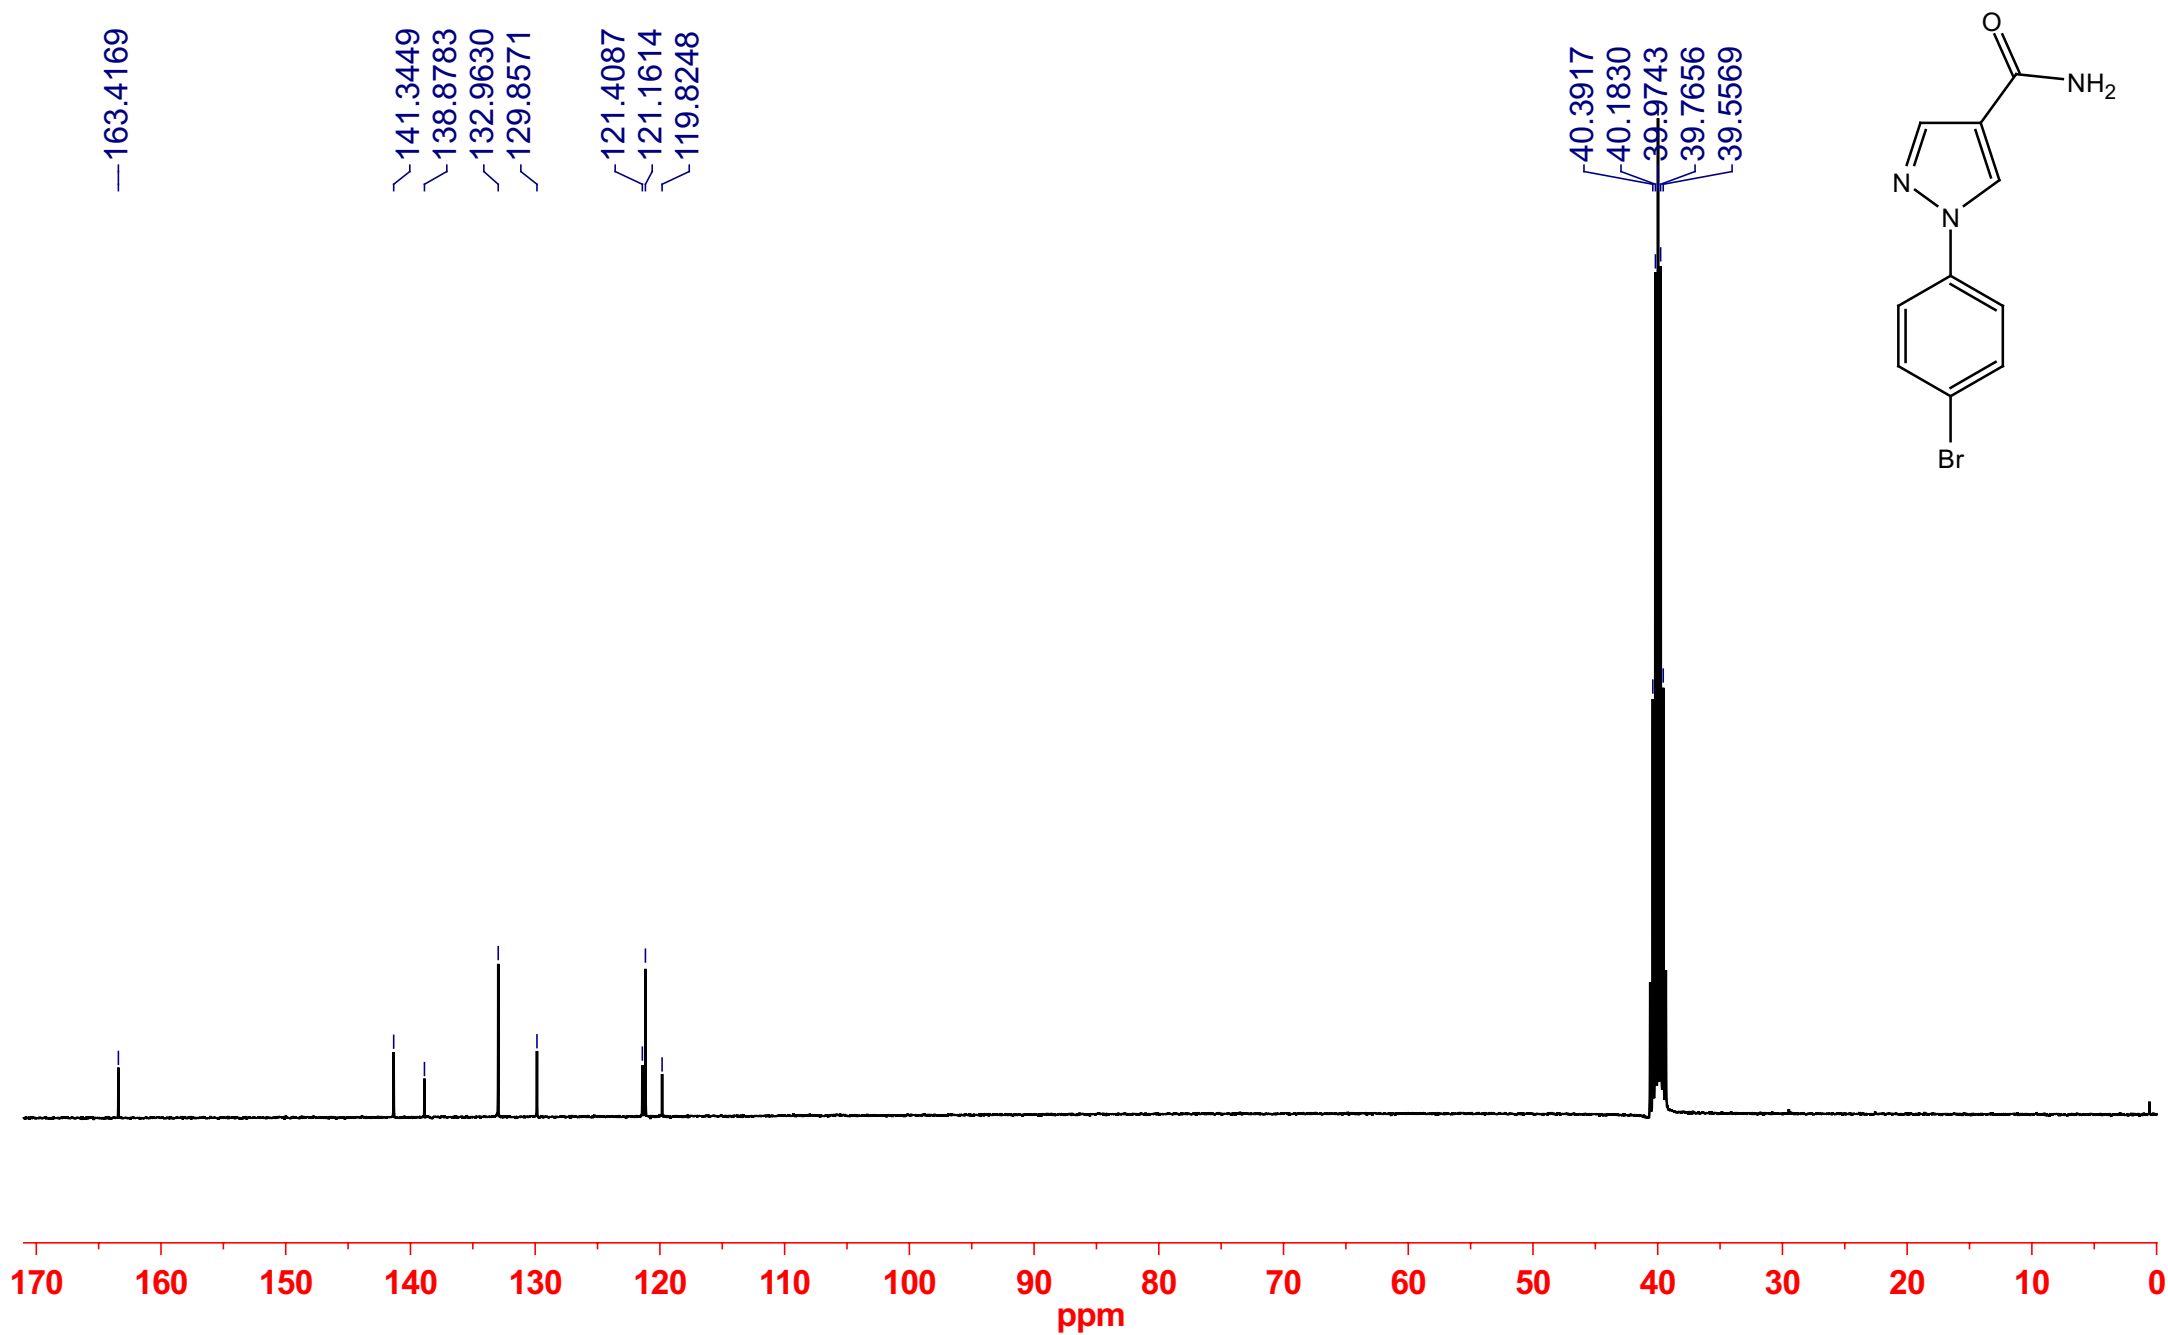

<sup>1</sup>H NMR of compound **1j**

8.9825  
8.1498  
8.0846  
8.0798  
8.0749  
7.8965  
7.8941  
7.8912  
7.8888  
7.8762  
7.8739  
7.8710  
7.8686  
7.6868  
7.5751  
7.5726  
7.5707  
7.5682  
7.5551  
7.5526  
7.5507  
7.5483  
7.5074  
7.4872  
7.4671  
7.2340

8.0846  
8.0798  
8.0749

7.8941  
7.8762  
7.8739  
7.8710  
7.8686

7.5551  
7.5526  
7.5507

7.5074  
7.4872  
7.4671

3.3584

2.5153  
2.5109  
2.5064  
2.5019  
2.4975

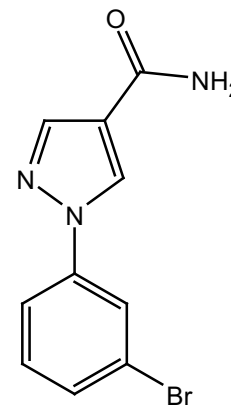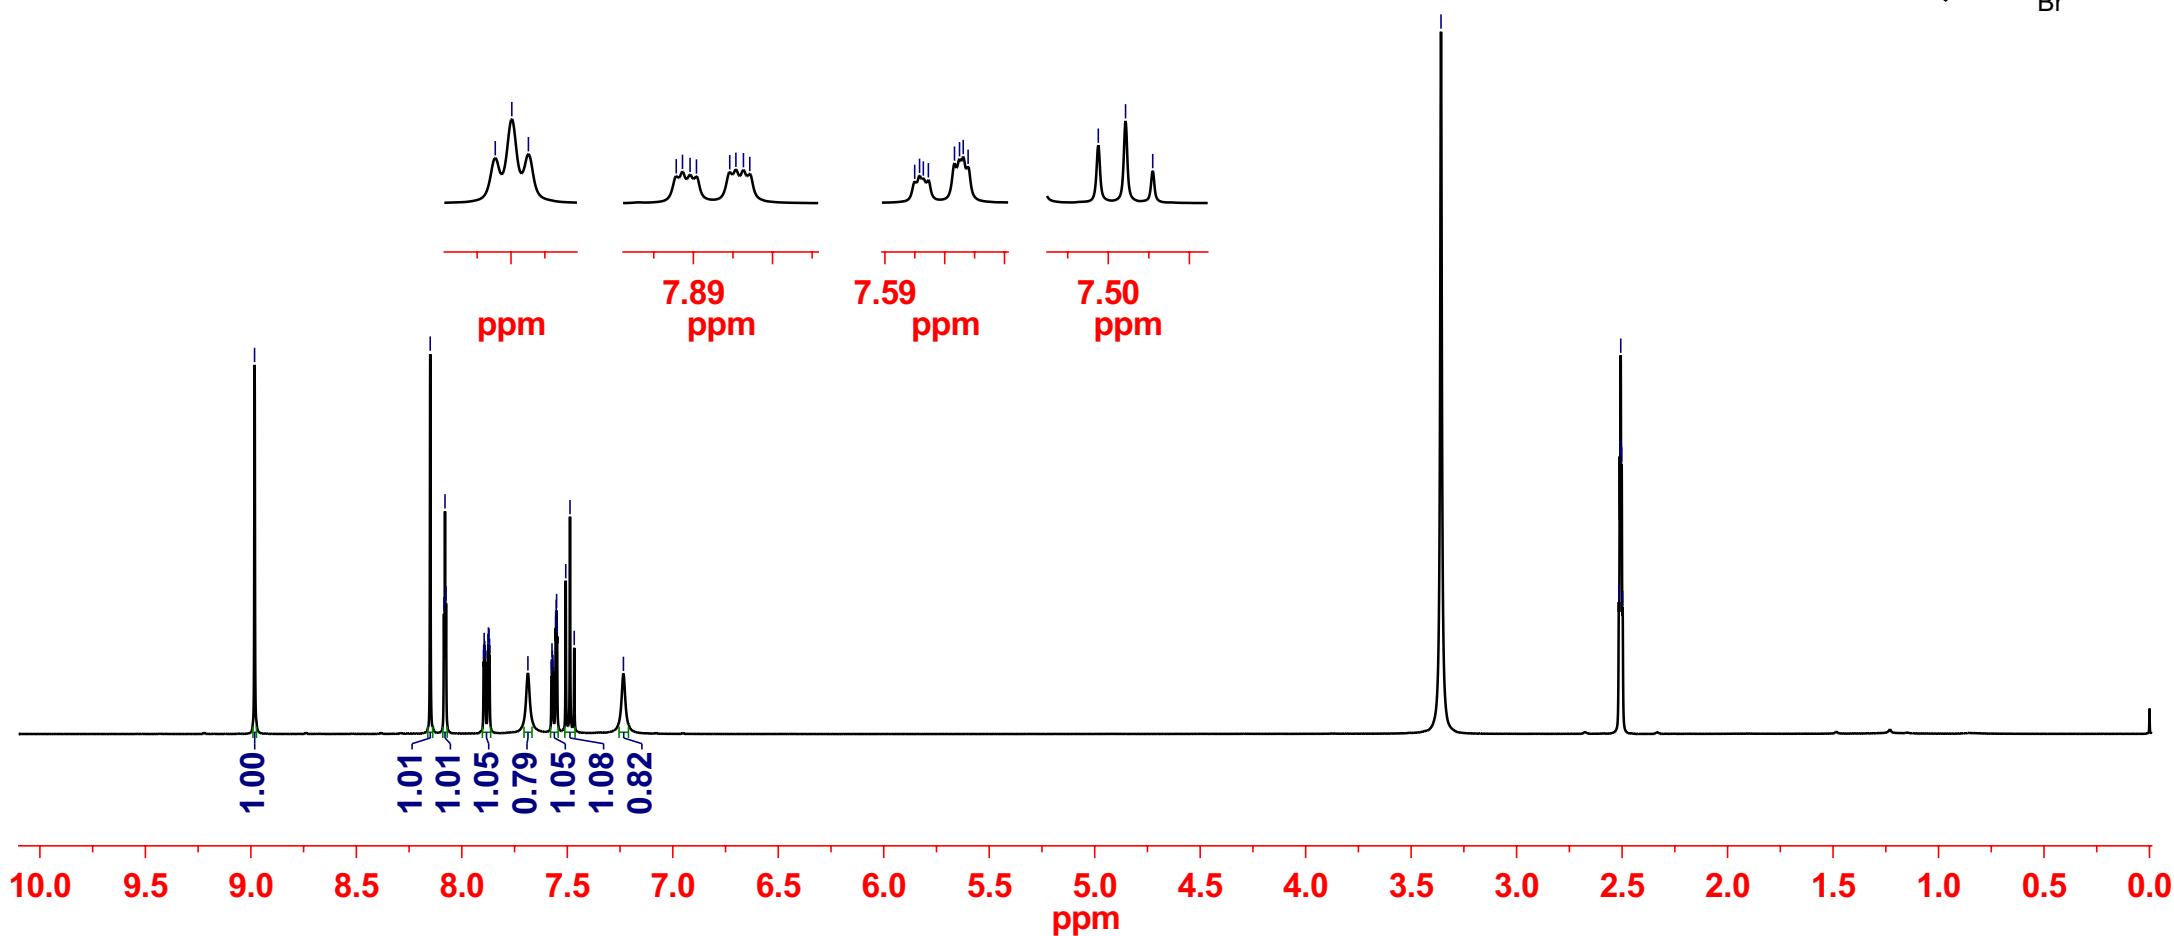

<sup>13</sup>C NMR of compound **1j**

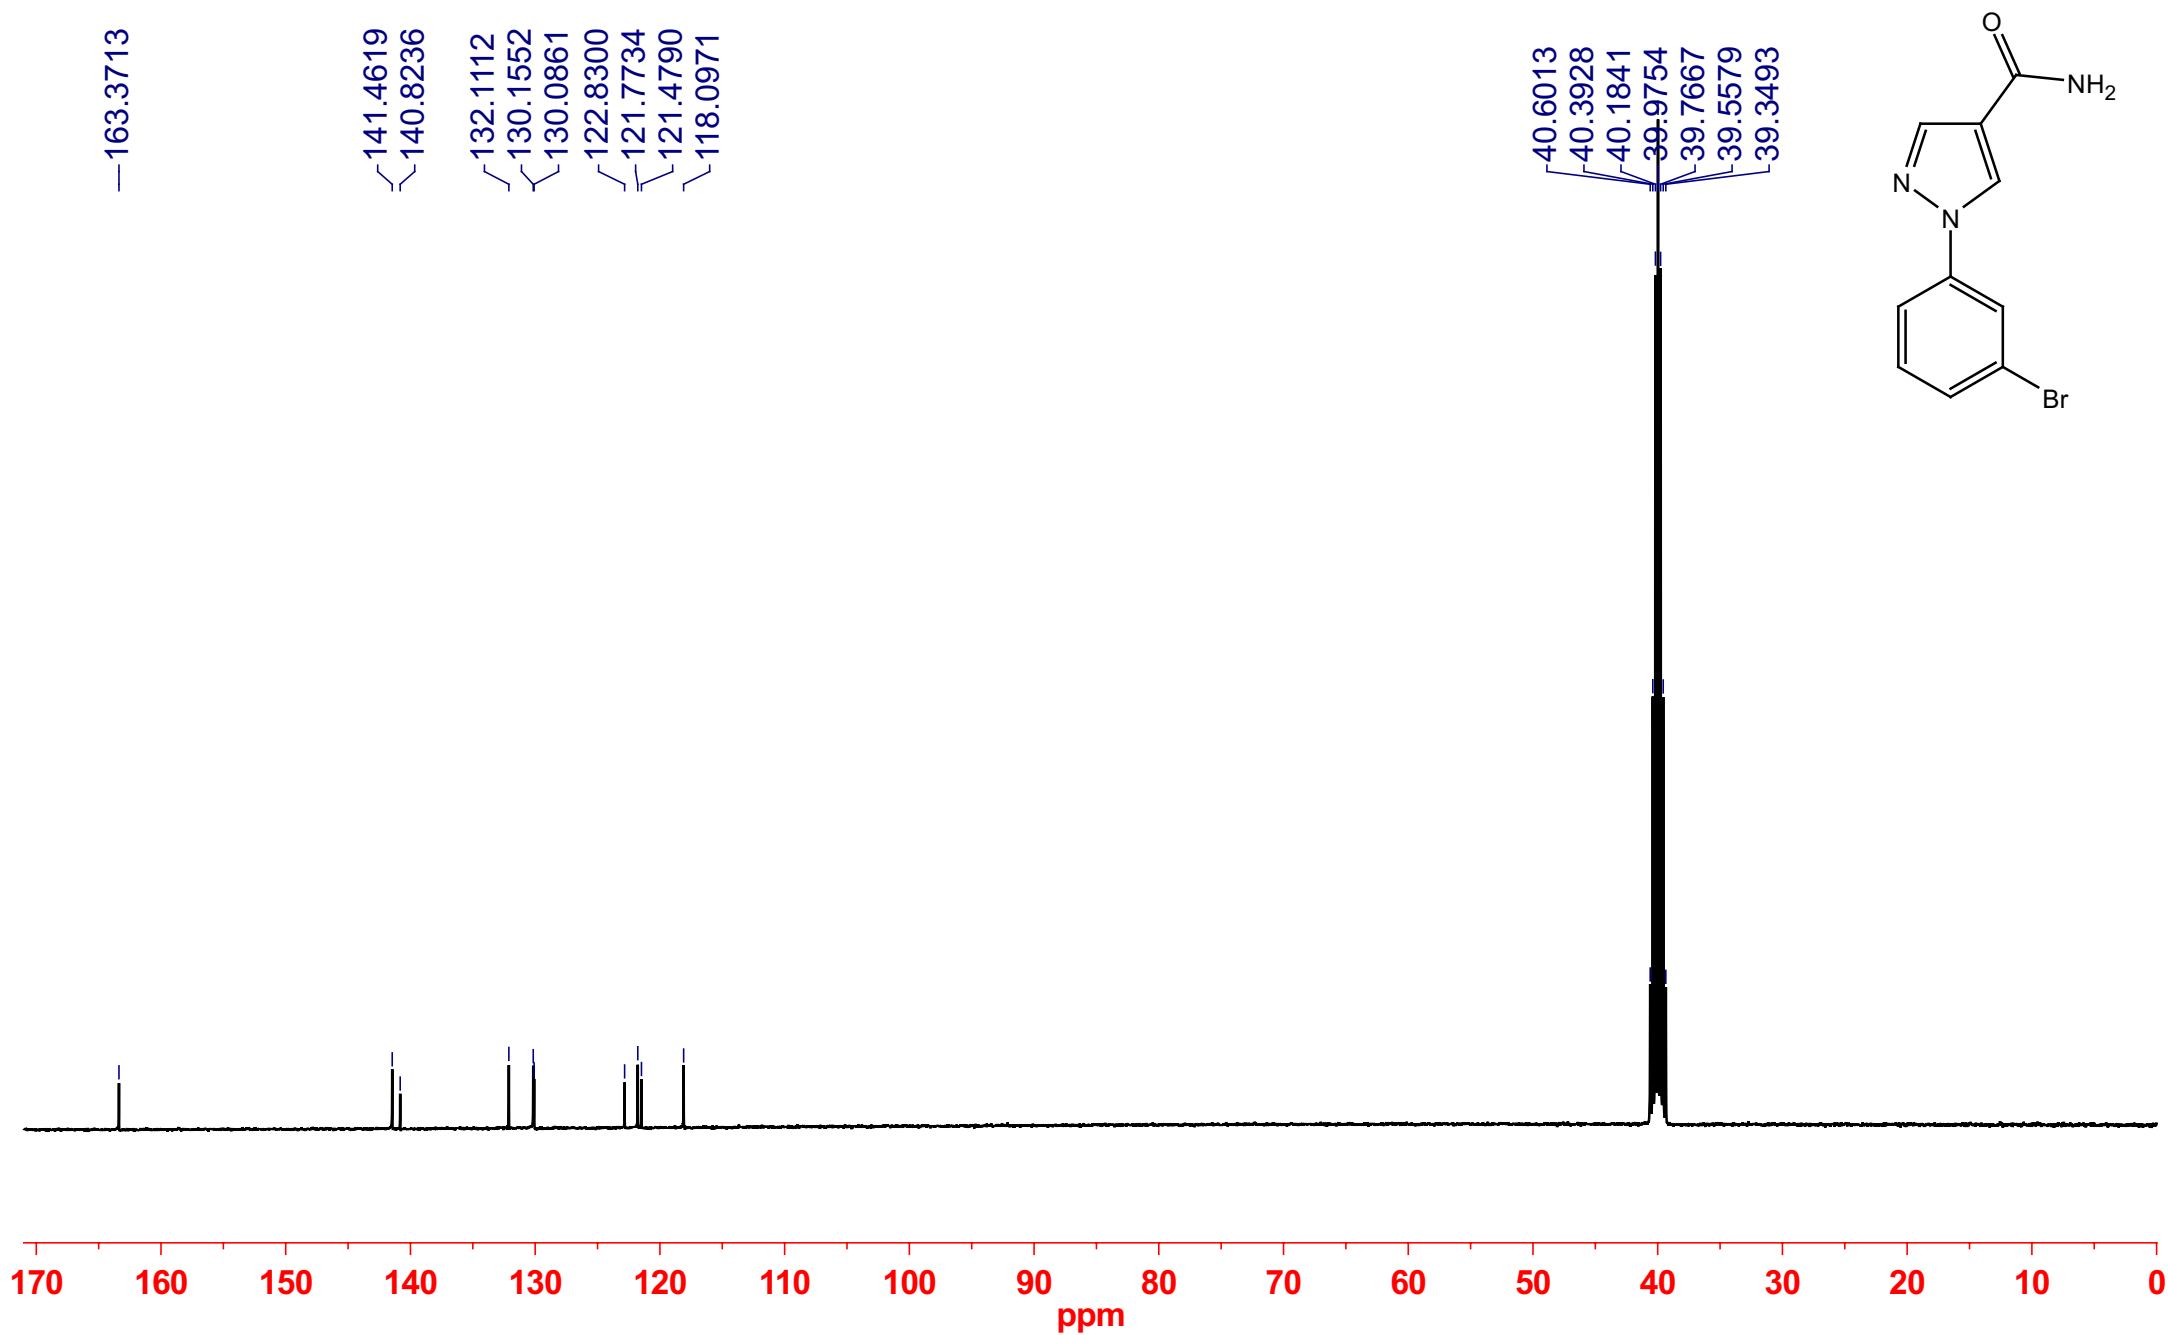



<sup>1</sup>H NMR of compound **1k**

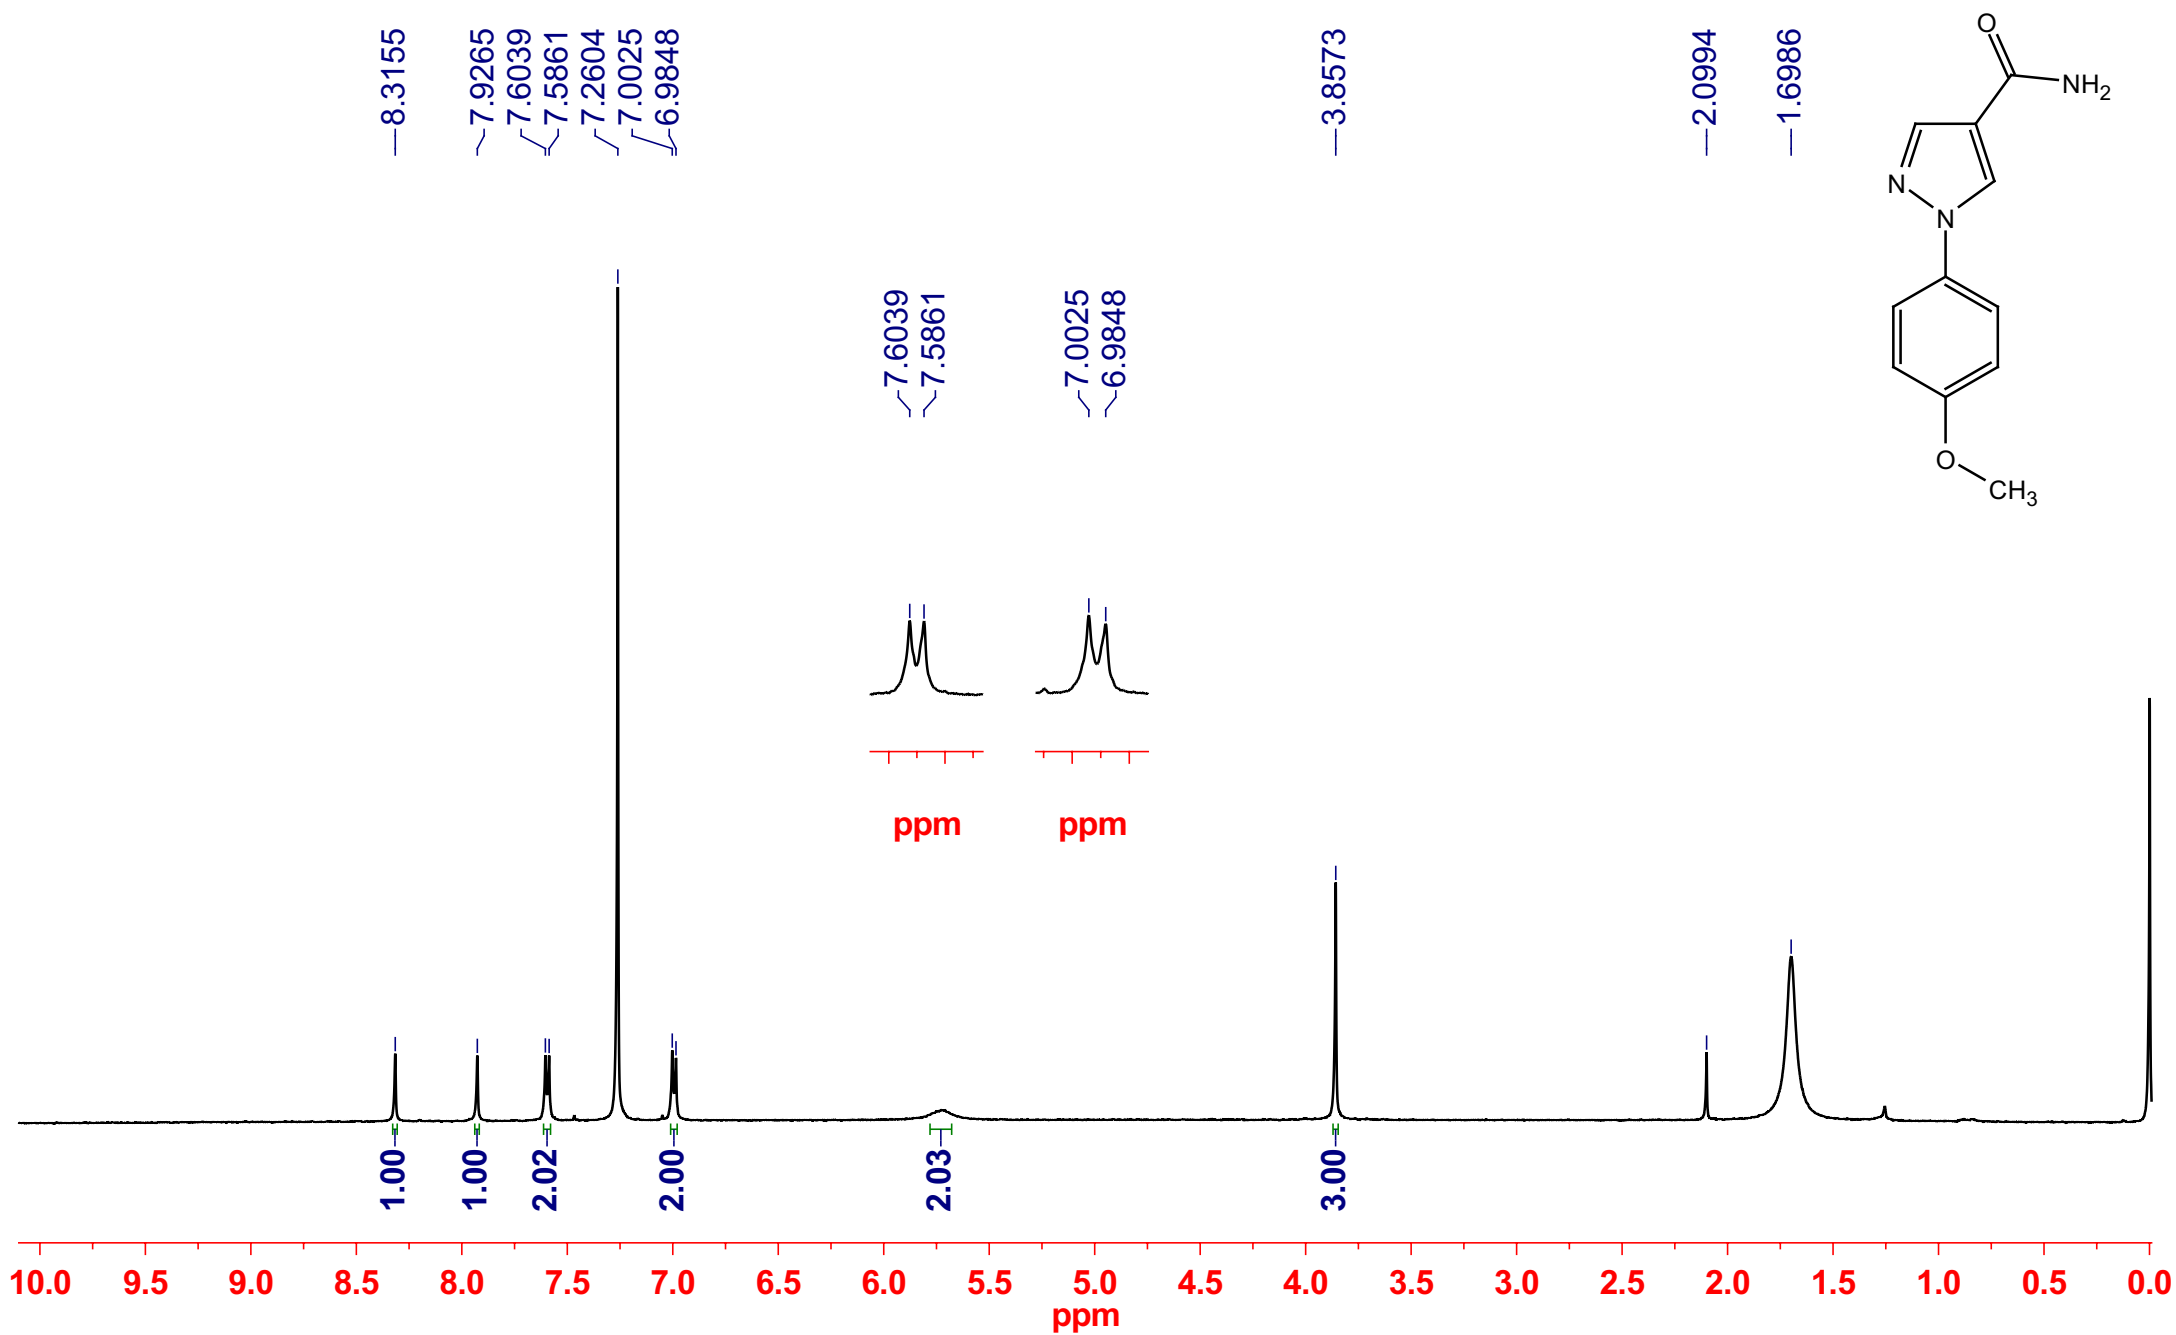

<sup>13</sup>C NMR of compound **1k**

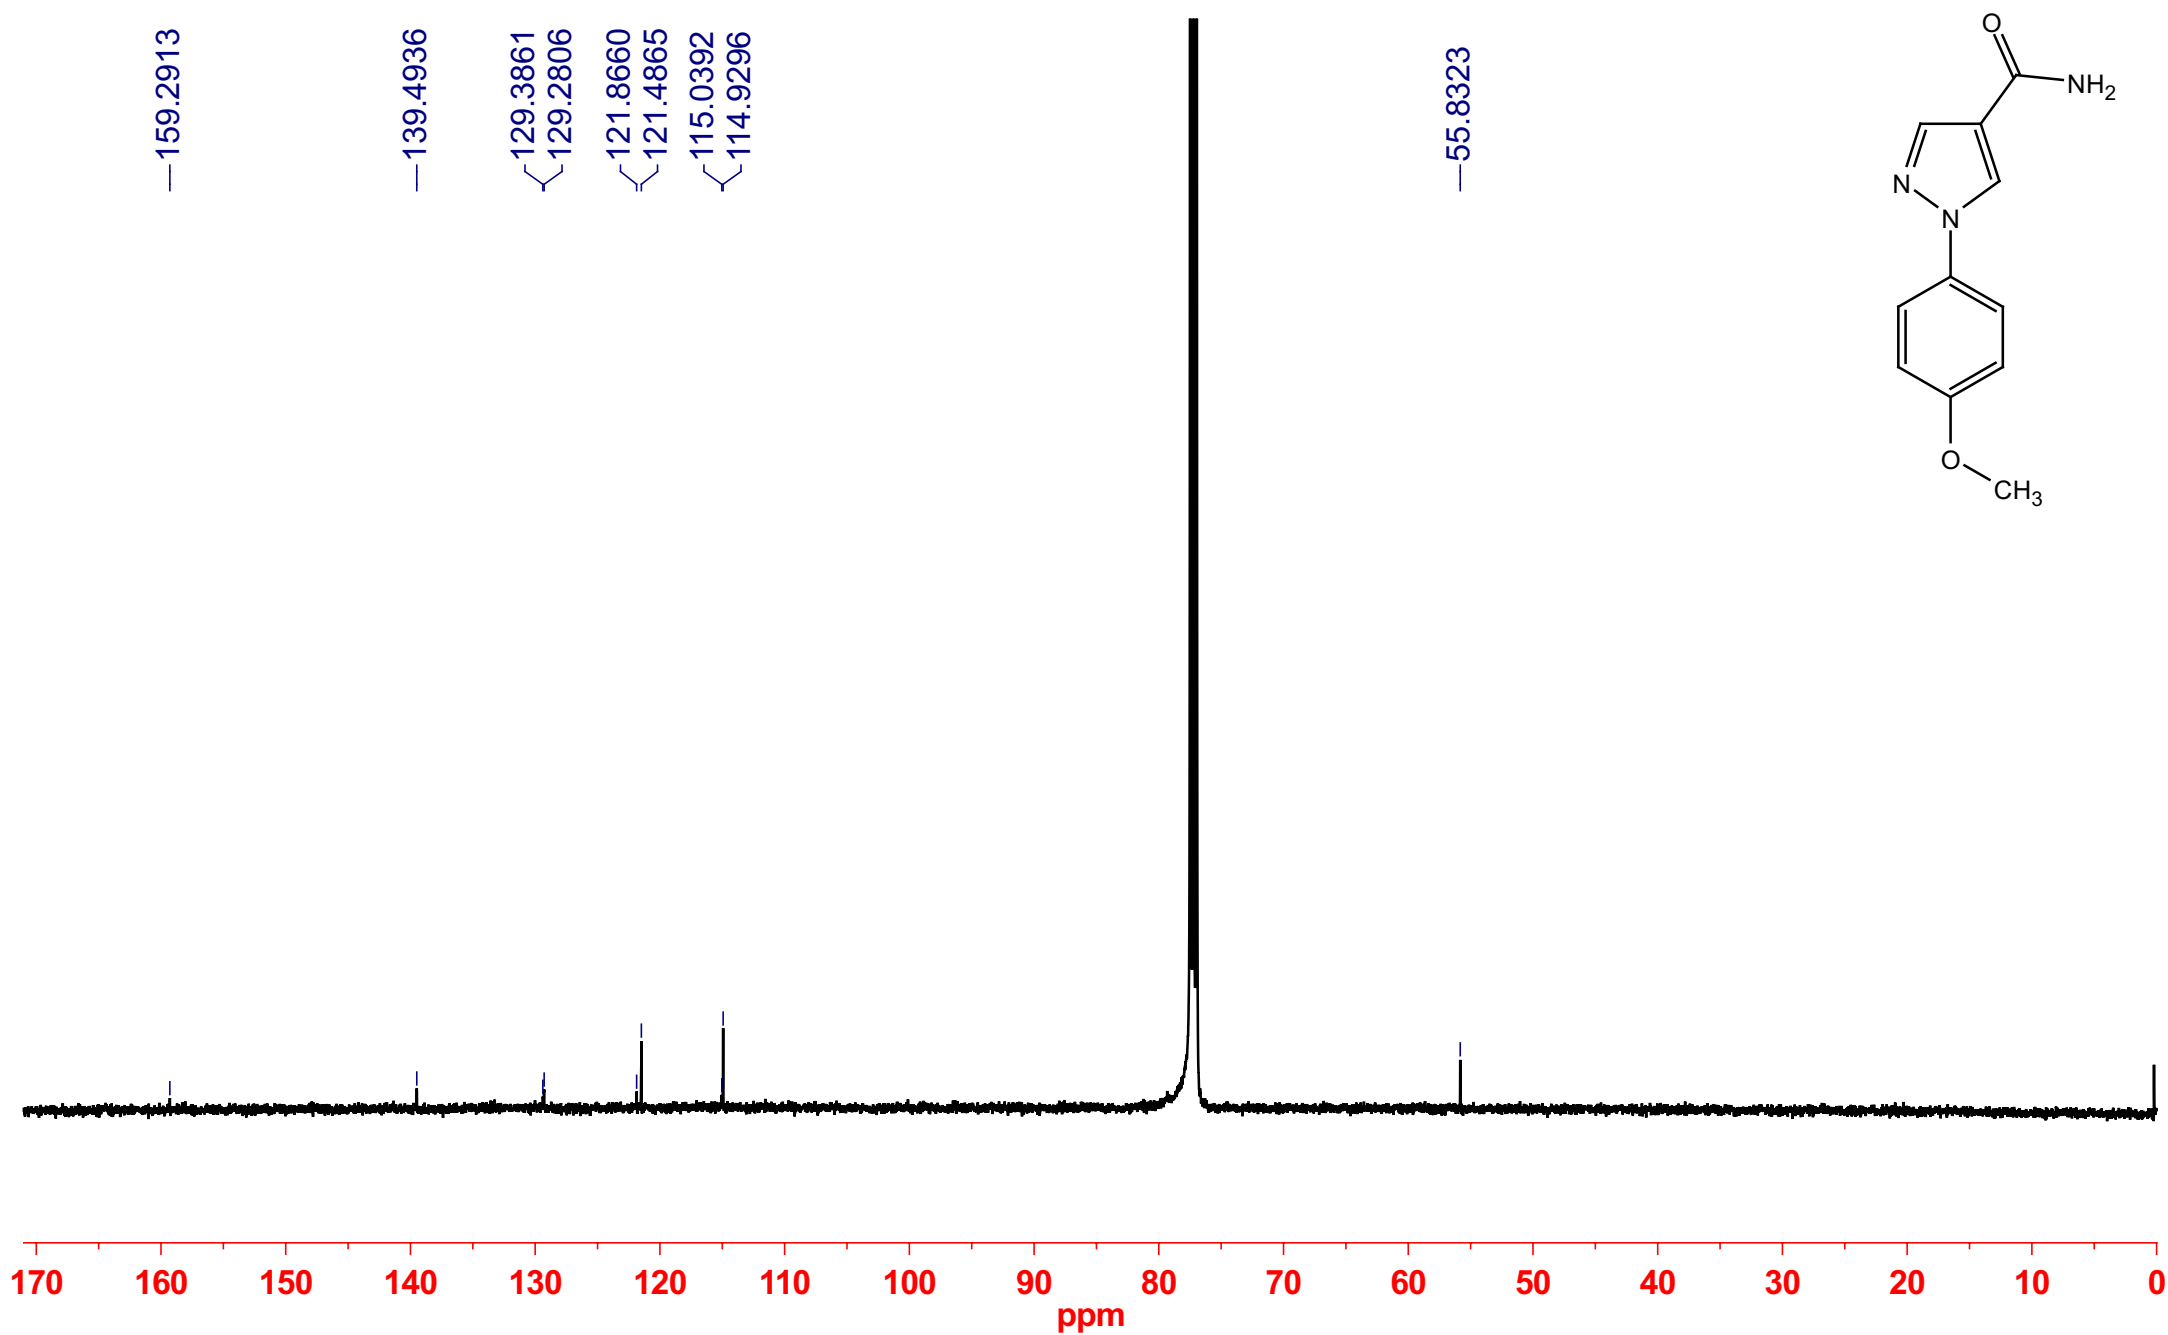

<sup>1</sup>H NMR of compound **11**

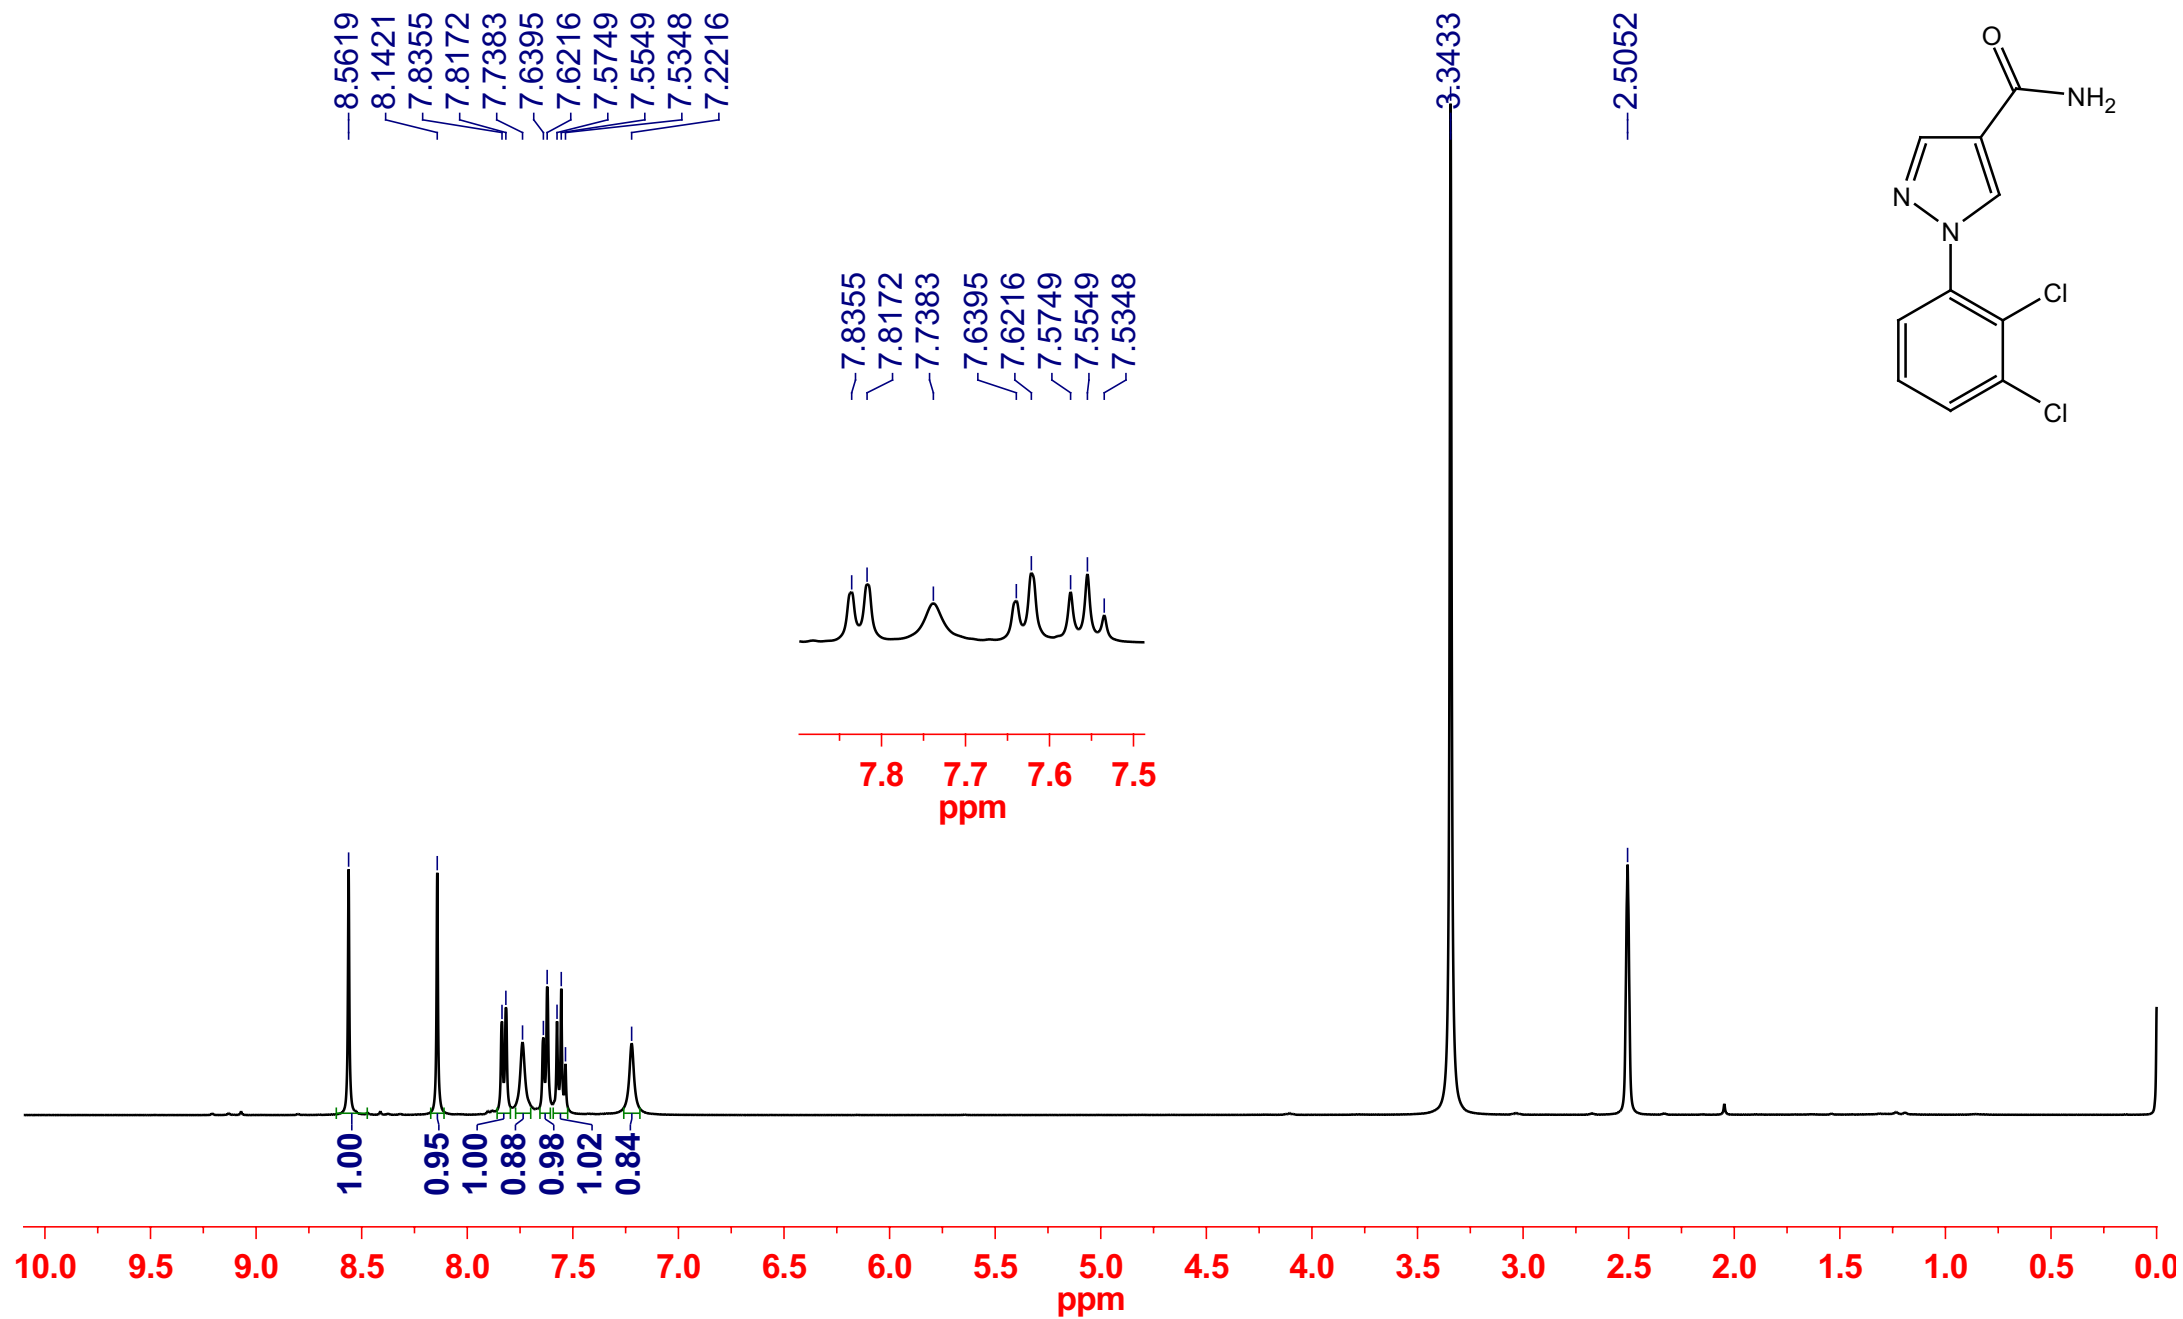

<sup>13</sup>C NMR of compound **1l**

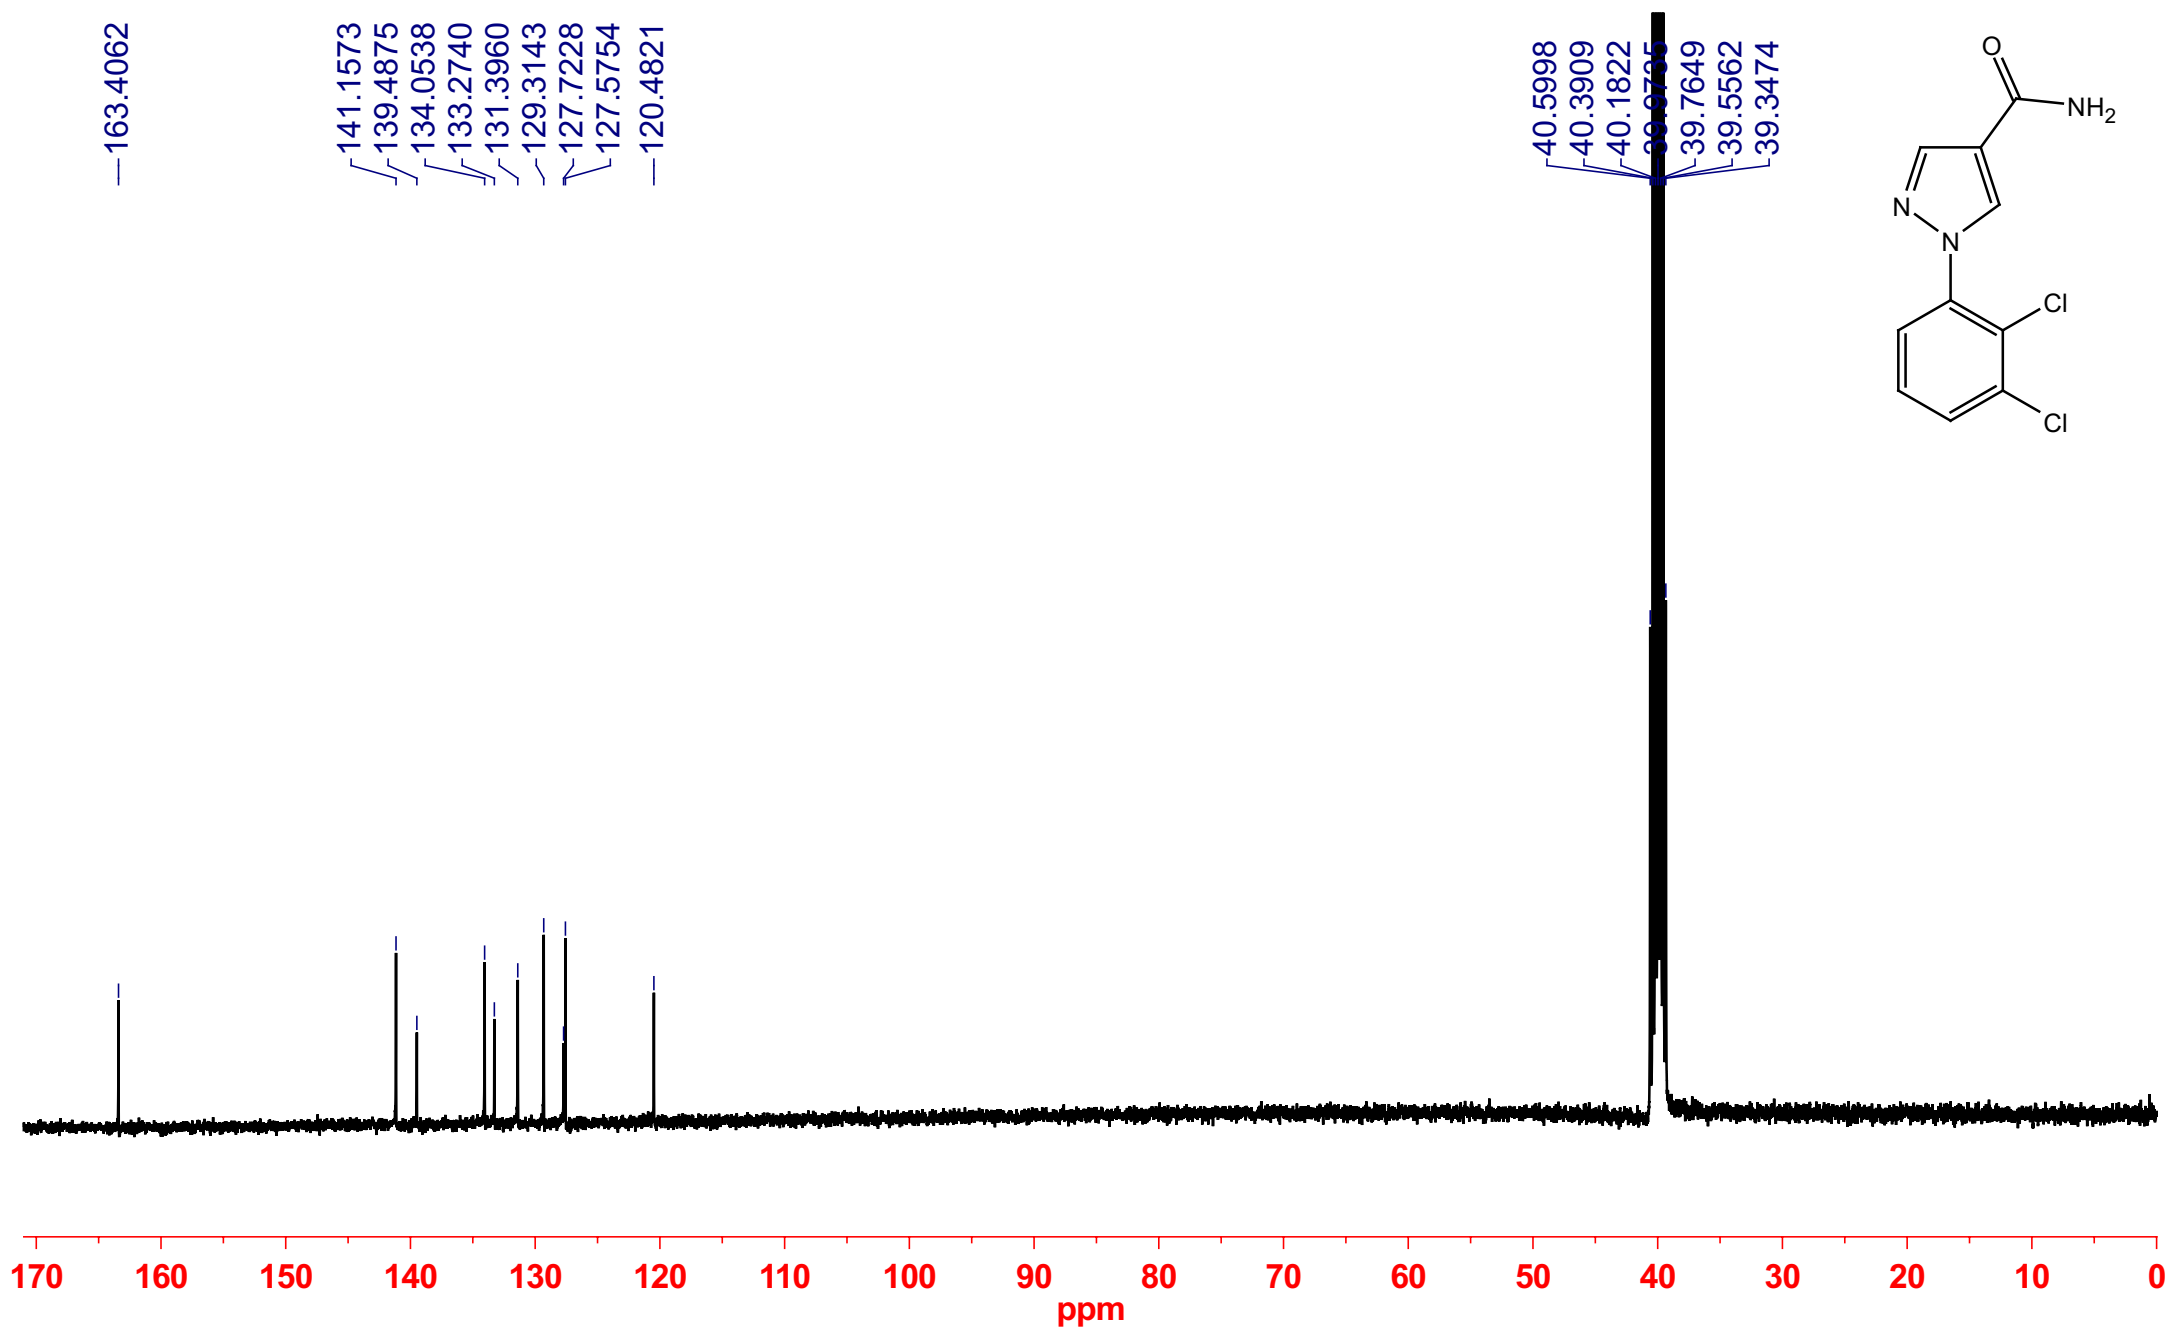

<sup>1</sup>H NMR of compound **2a**

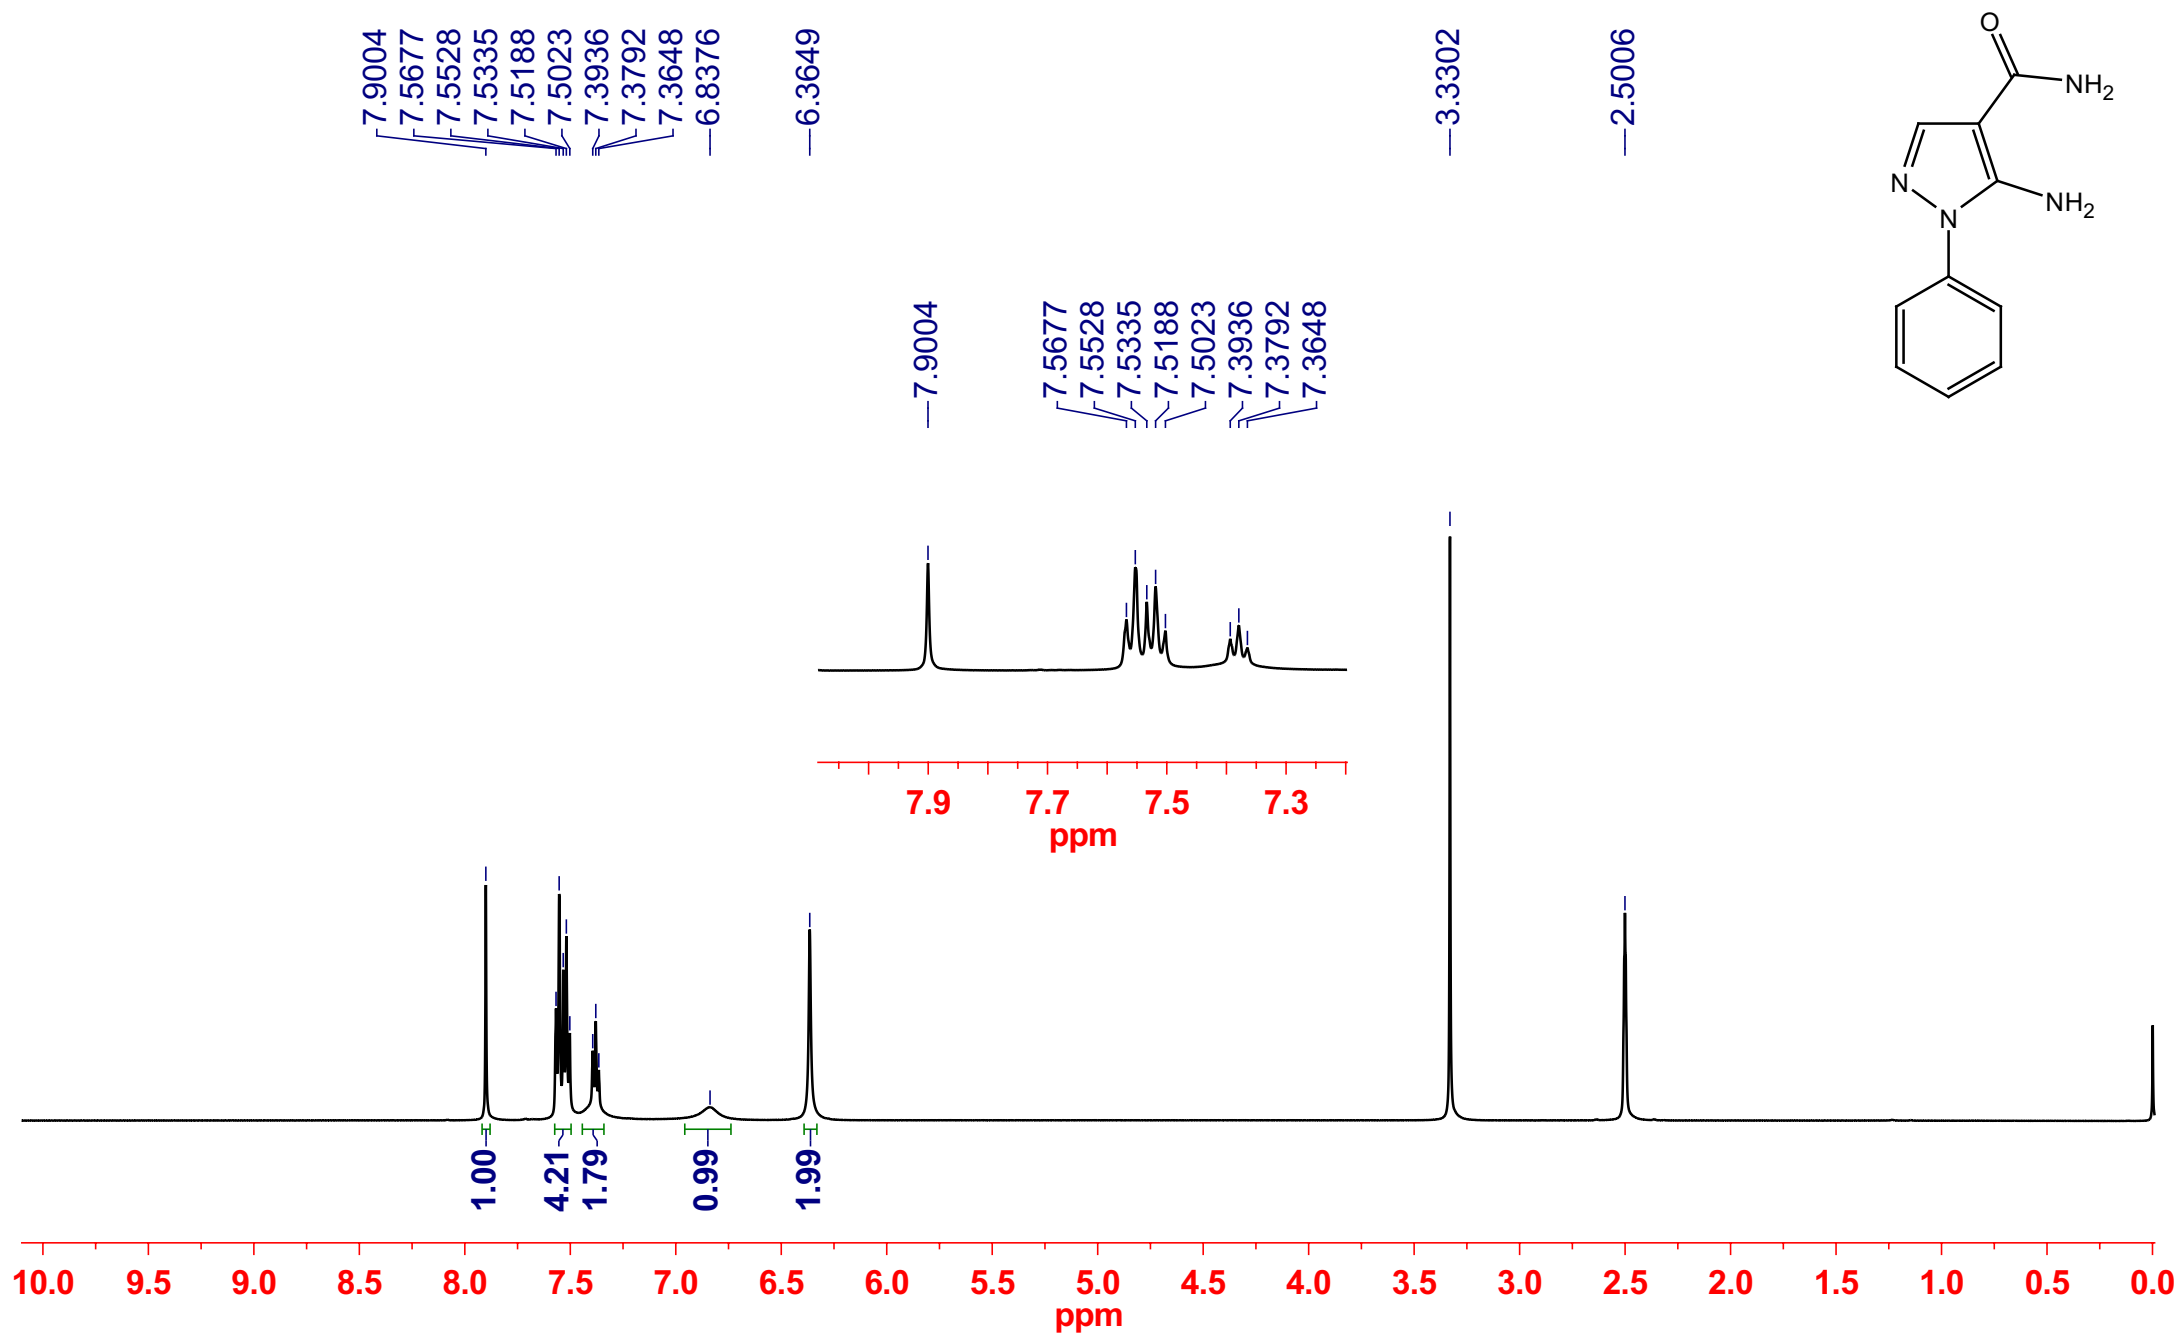

<sup>13</sup>C NMR of compound **2a**

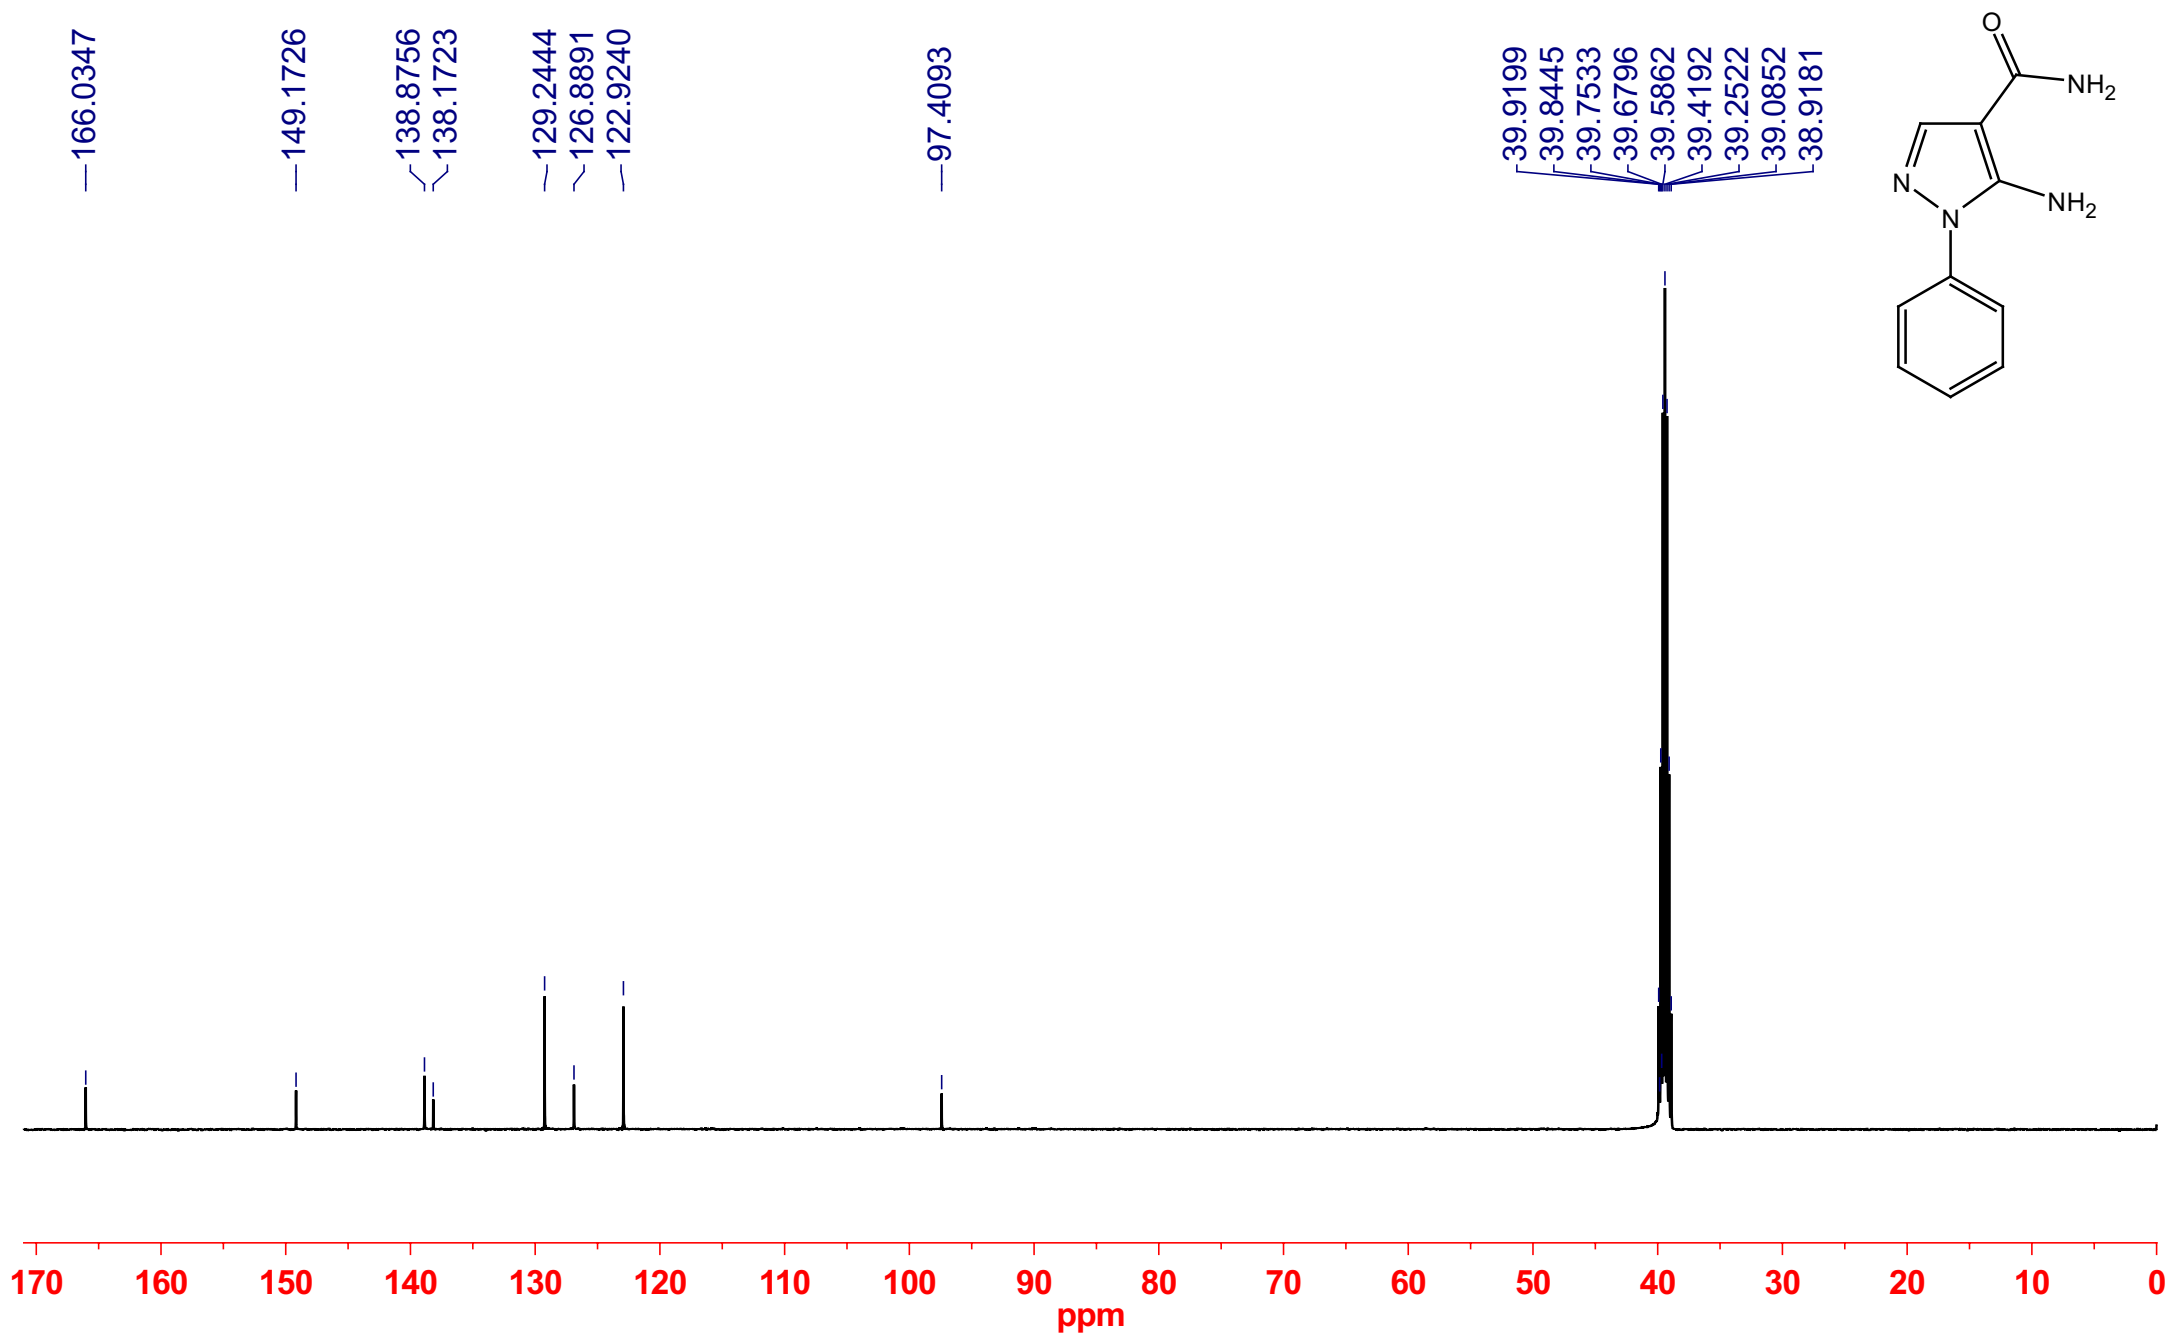

<sup>1</sup>H NMR of compound **2b**

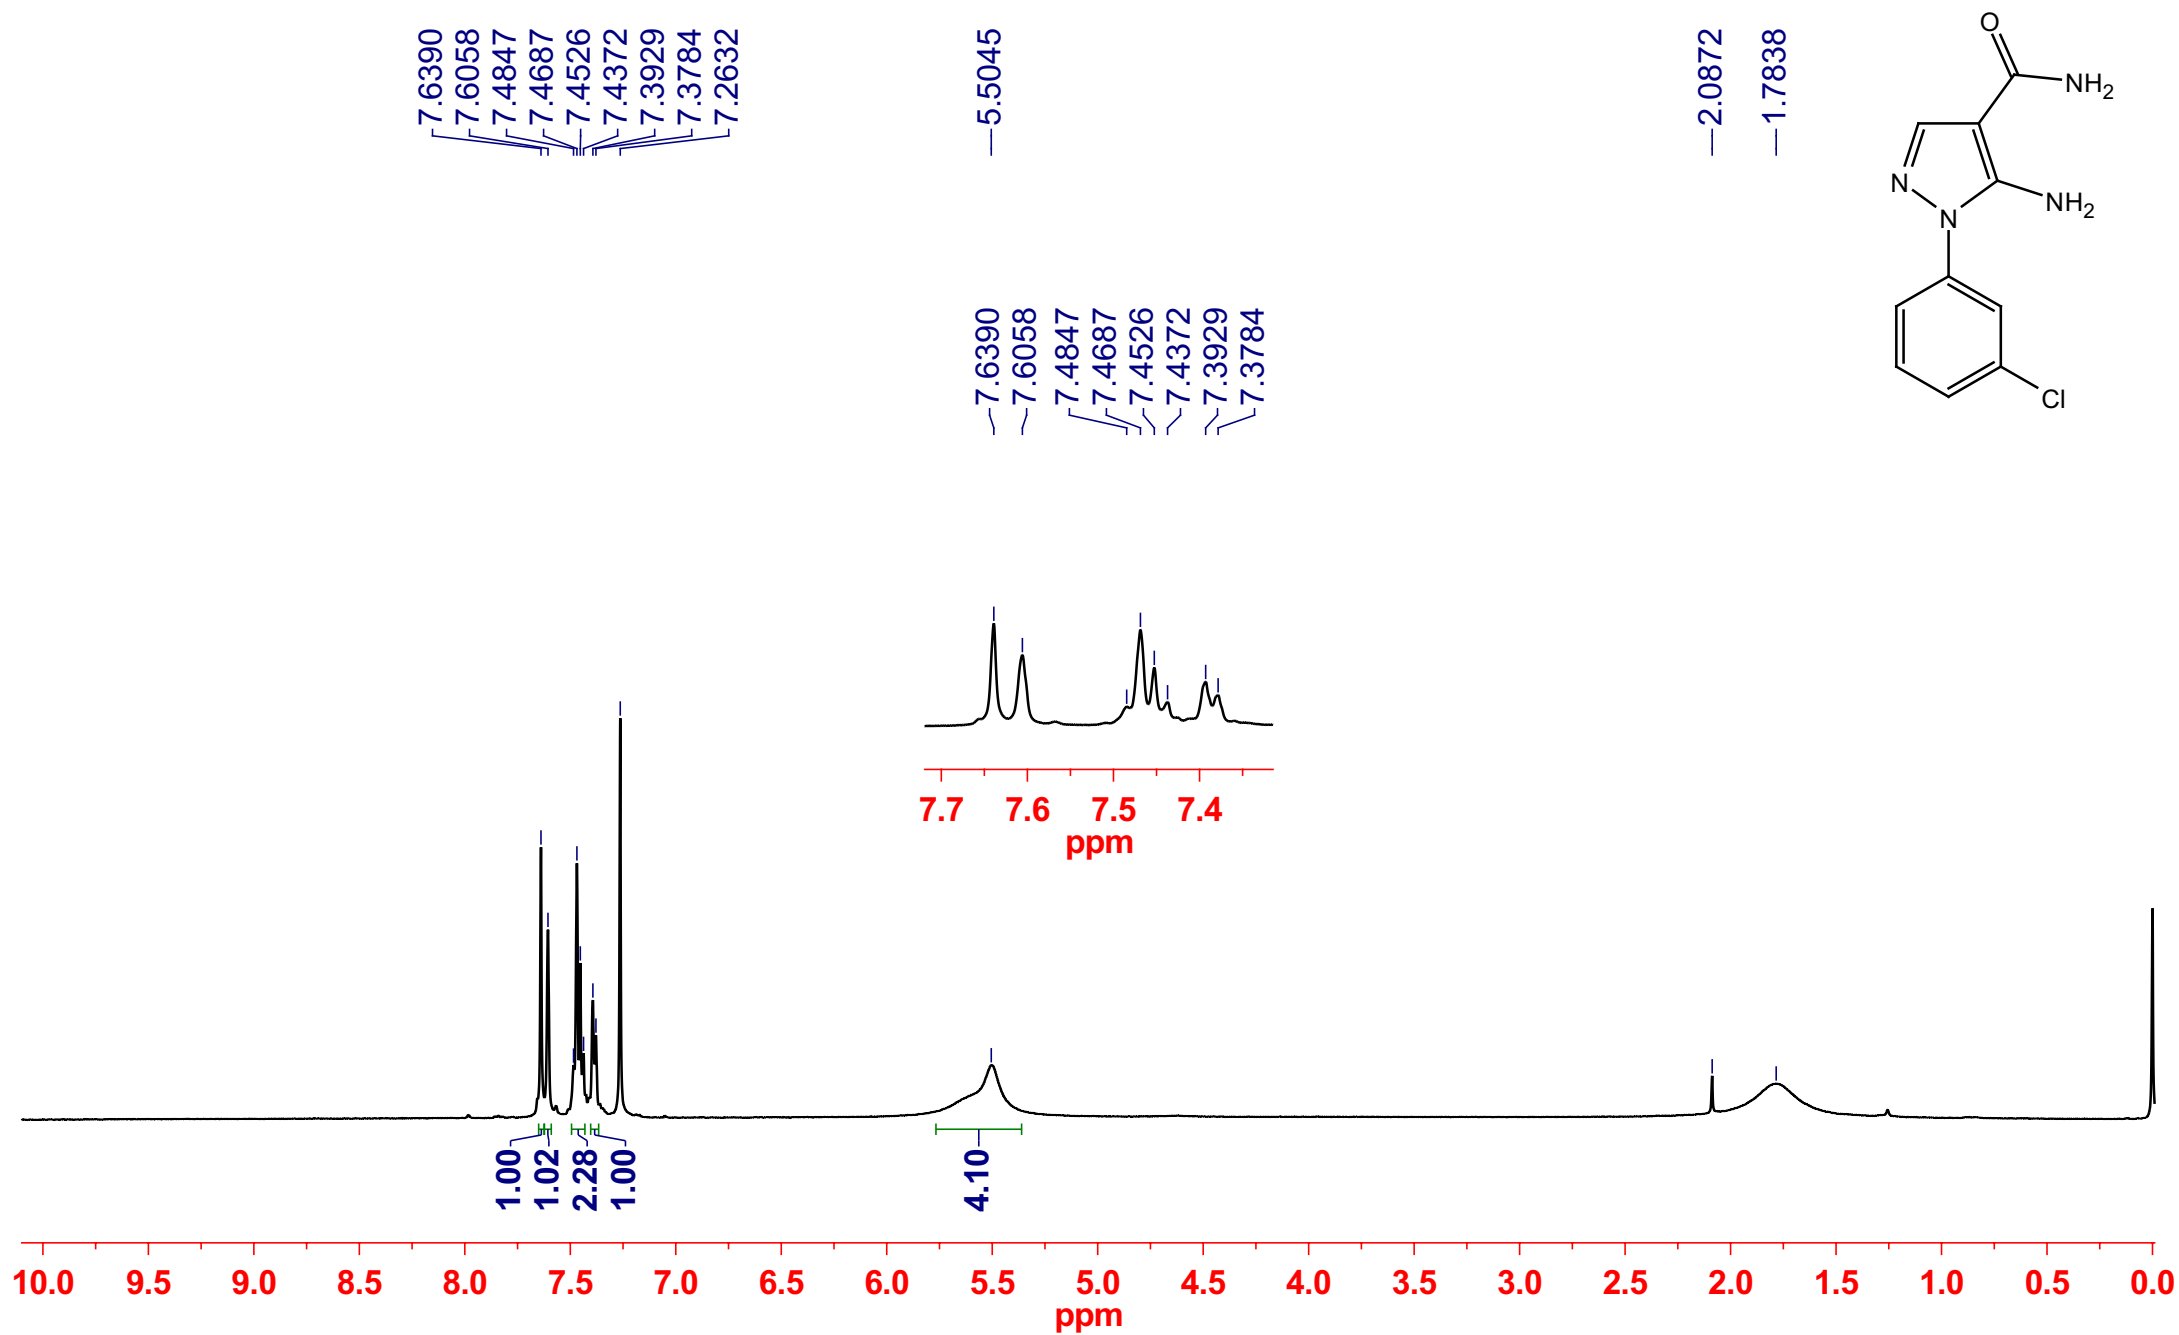

<sup>13</sup>C NMR of compound **2b**

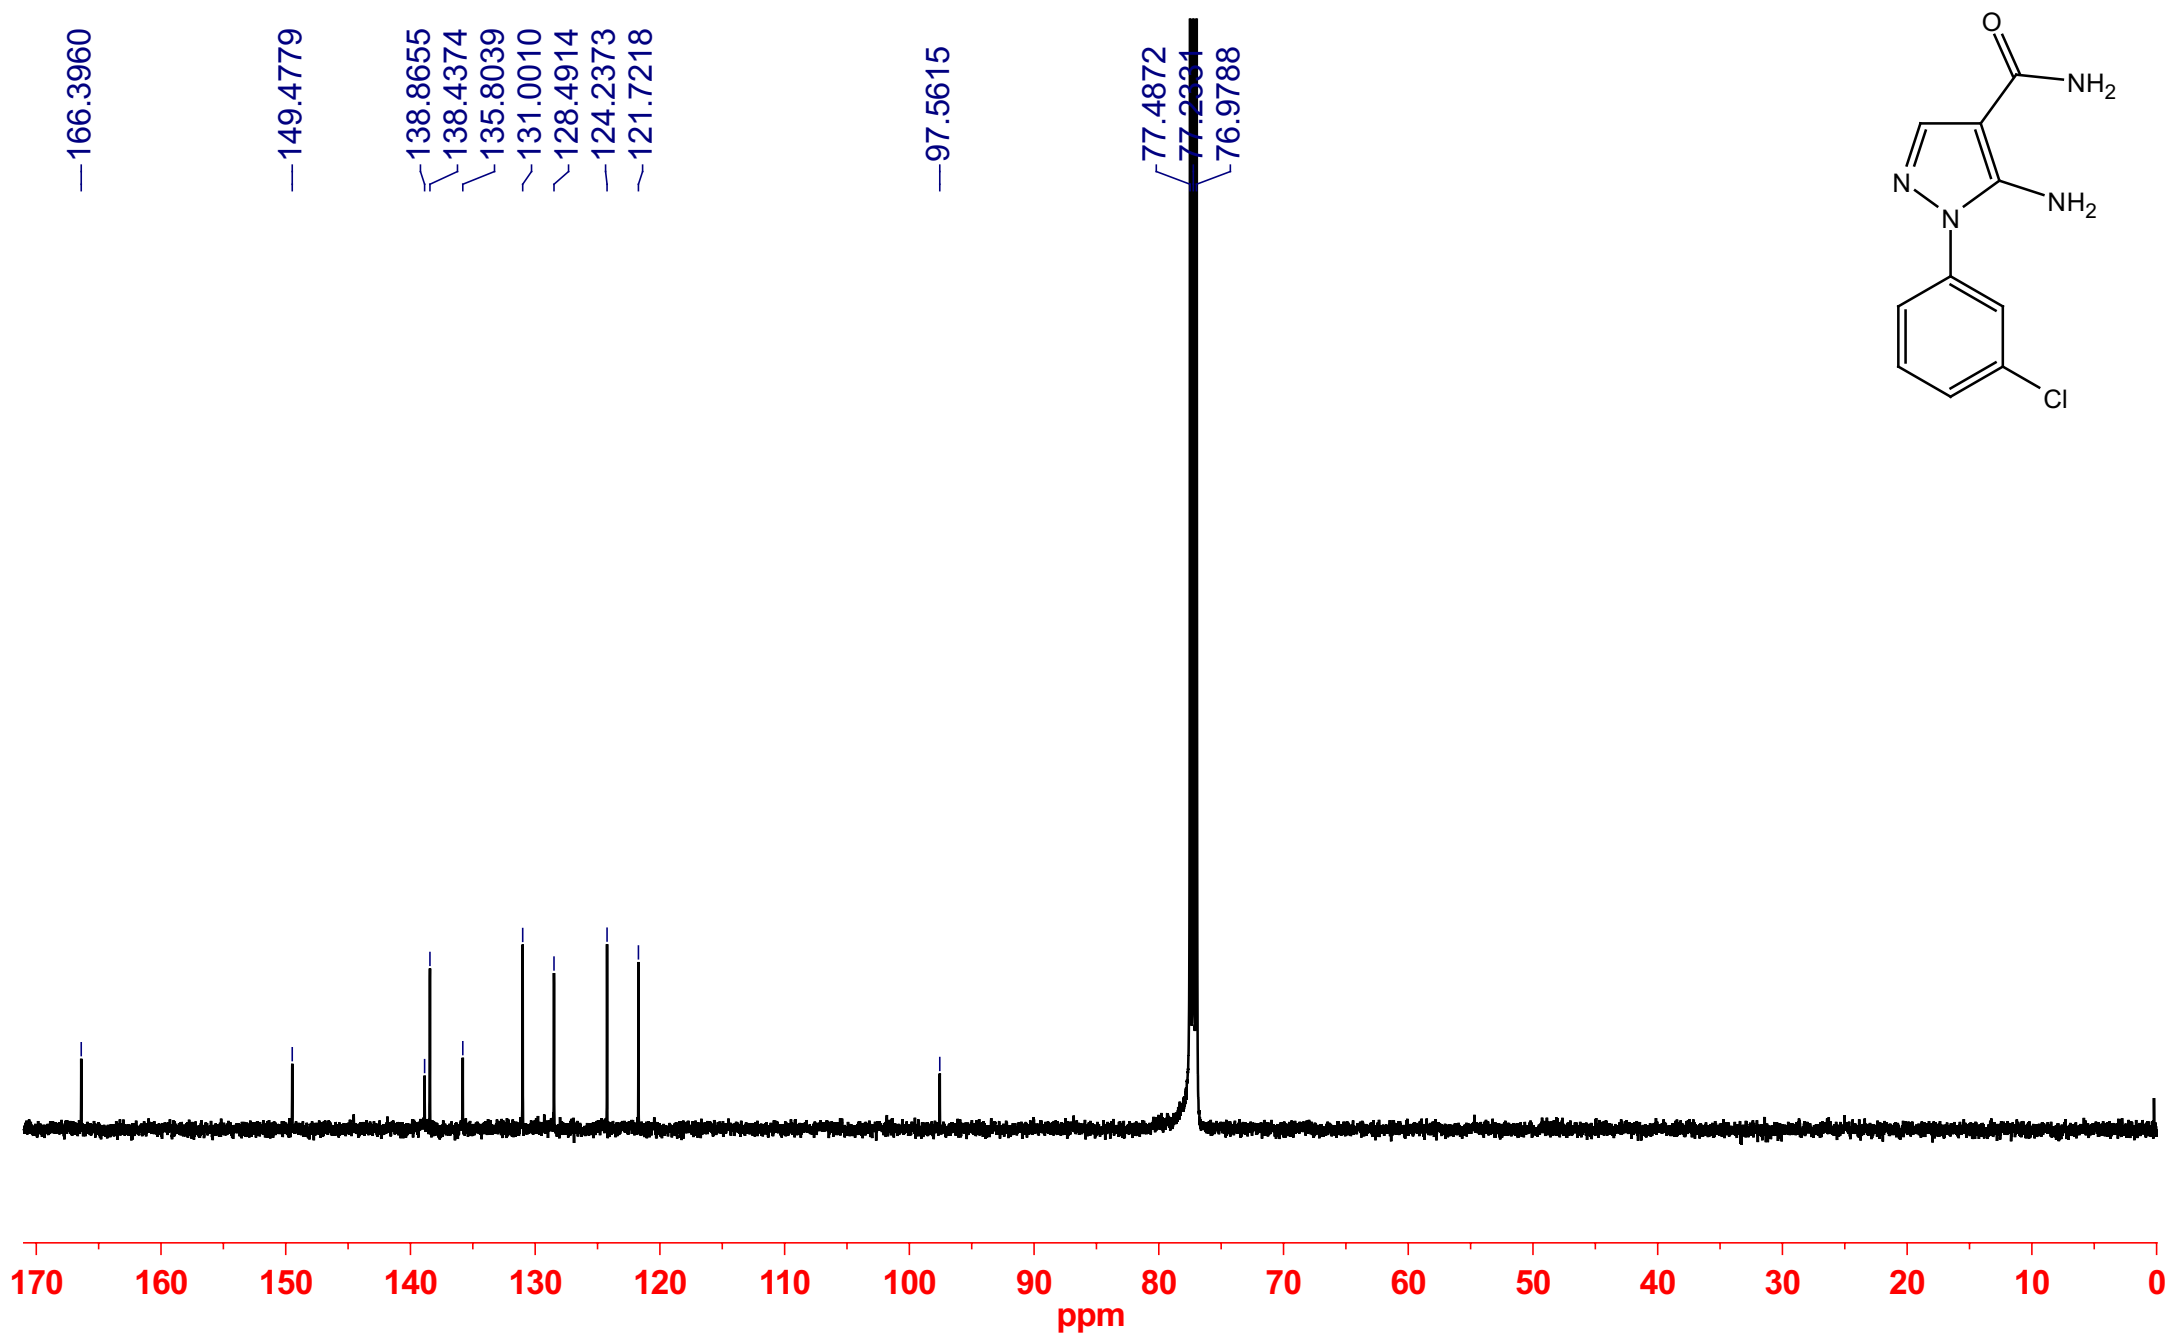



<sup>1</sup>H NMR of compound **2c**

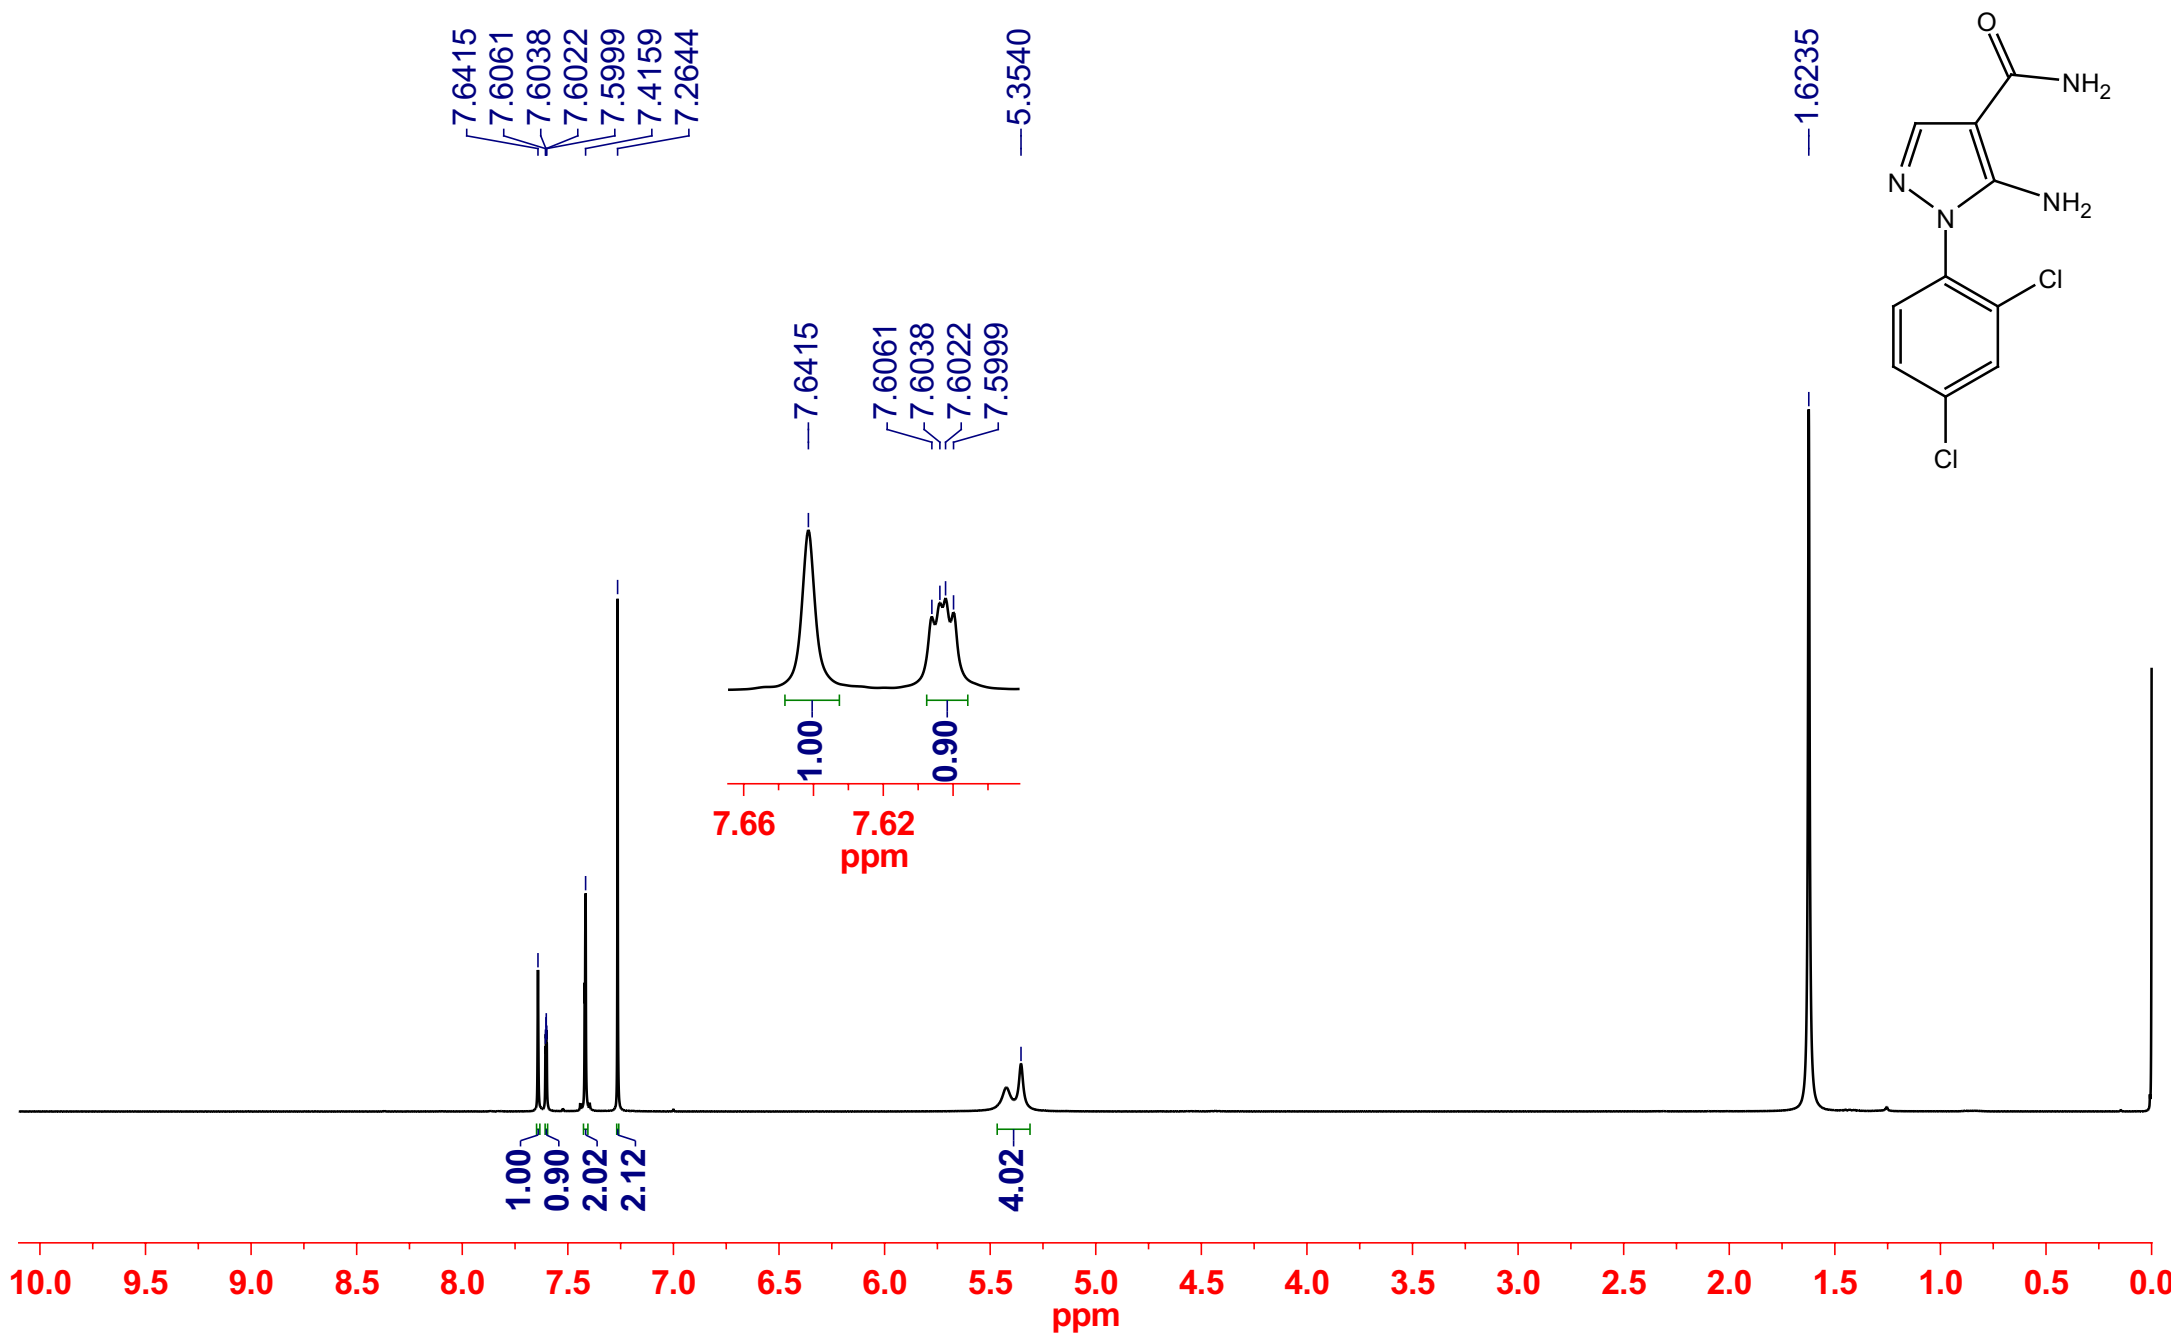

<sup>13</sup>C NMR of compound **2c**

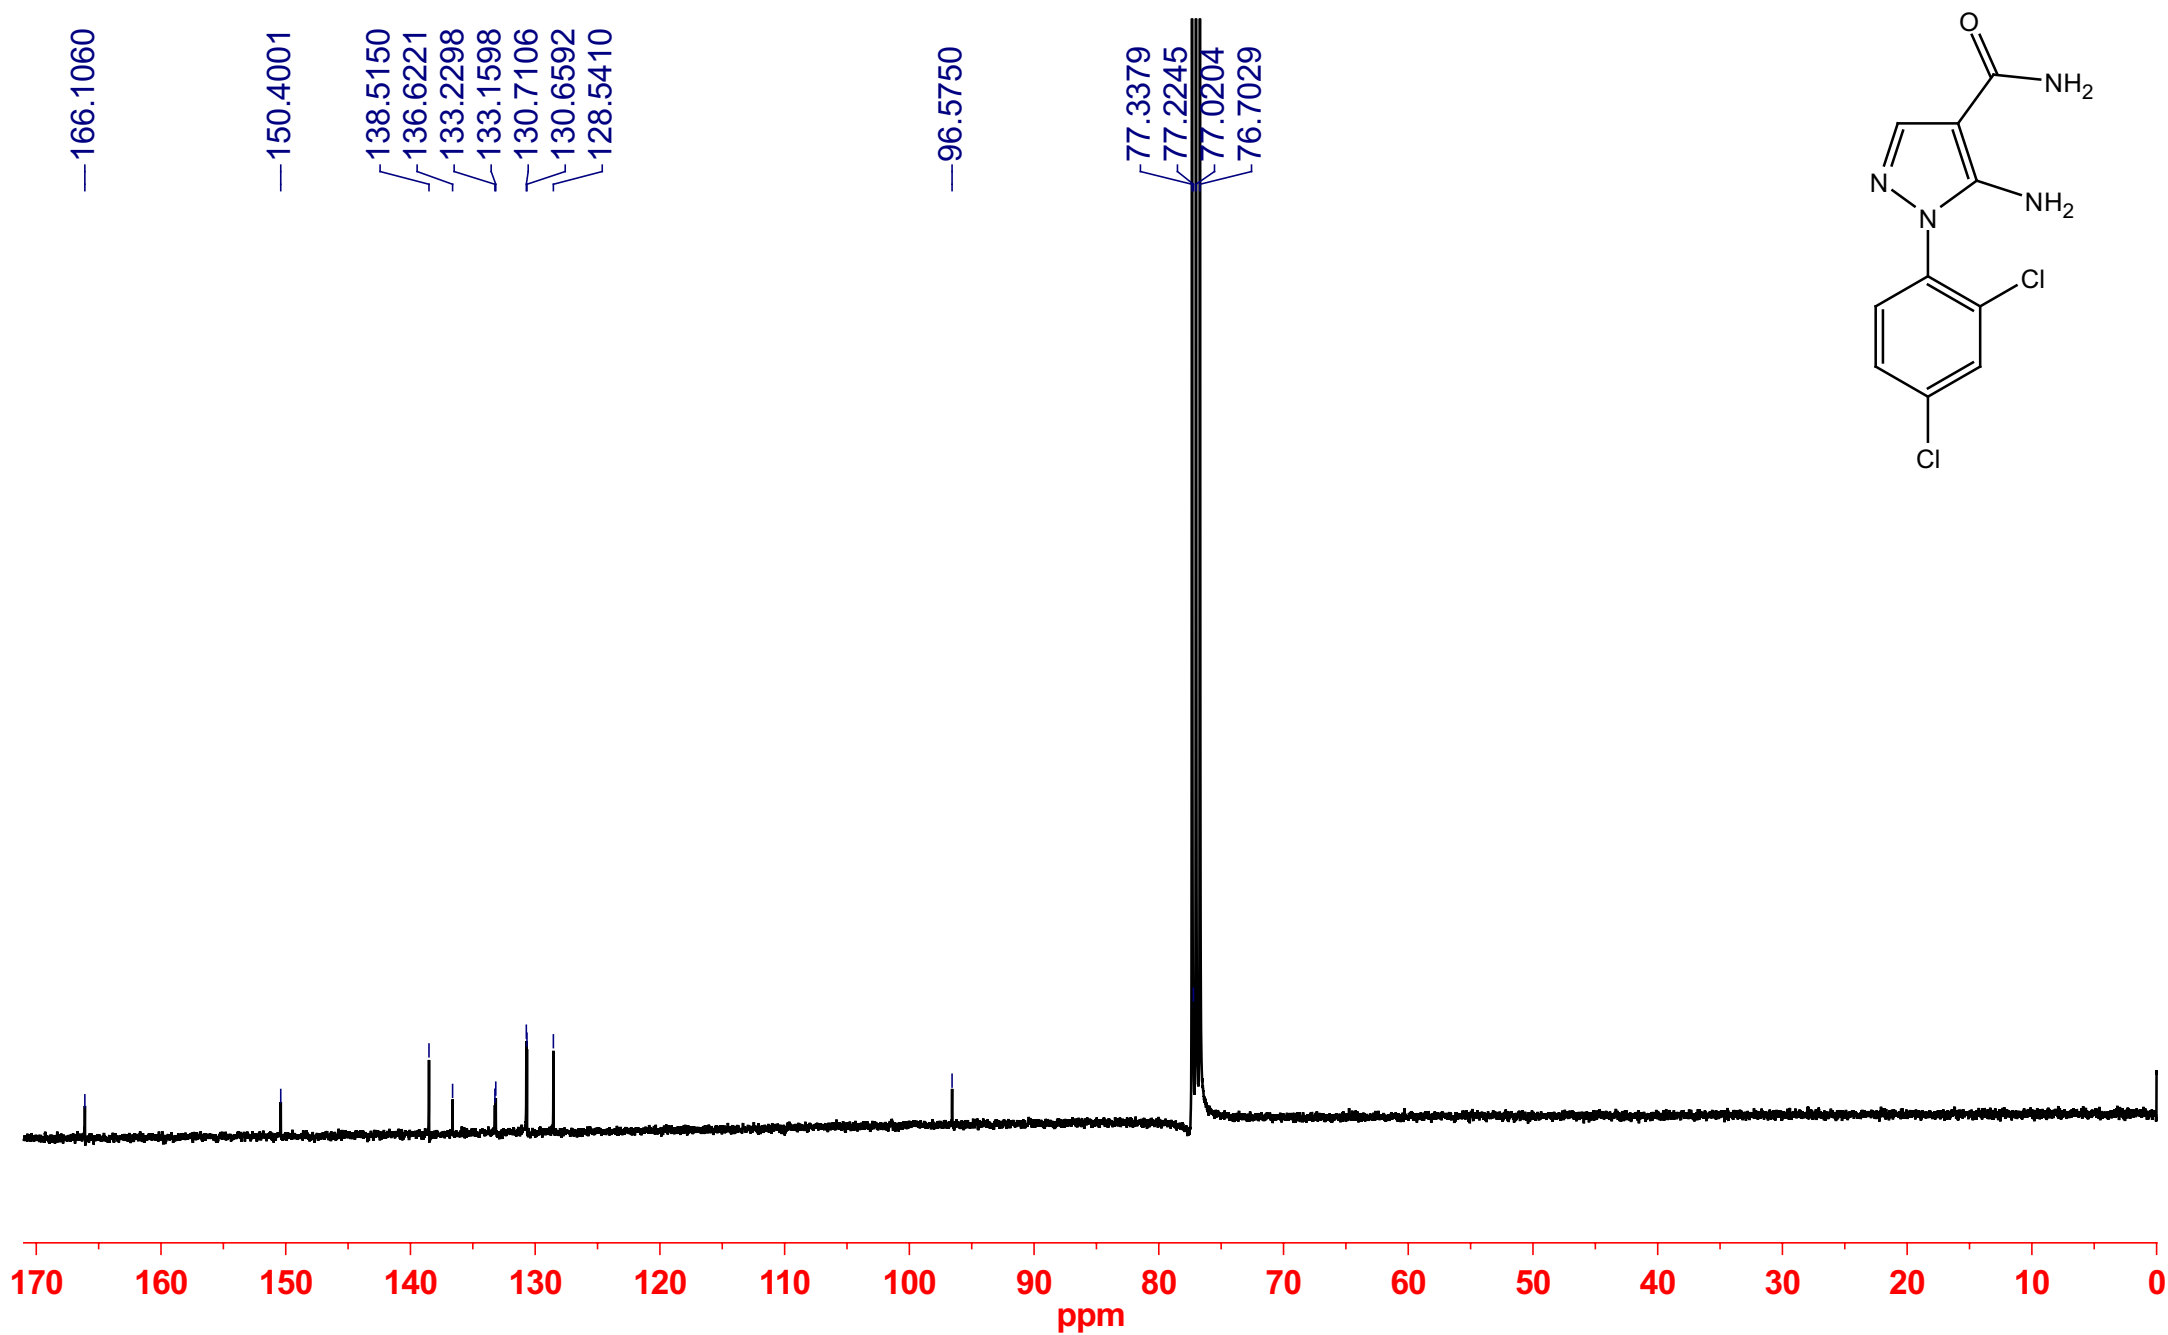

<sup>1</sup>H NMR of compound **2d**

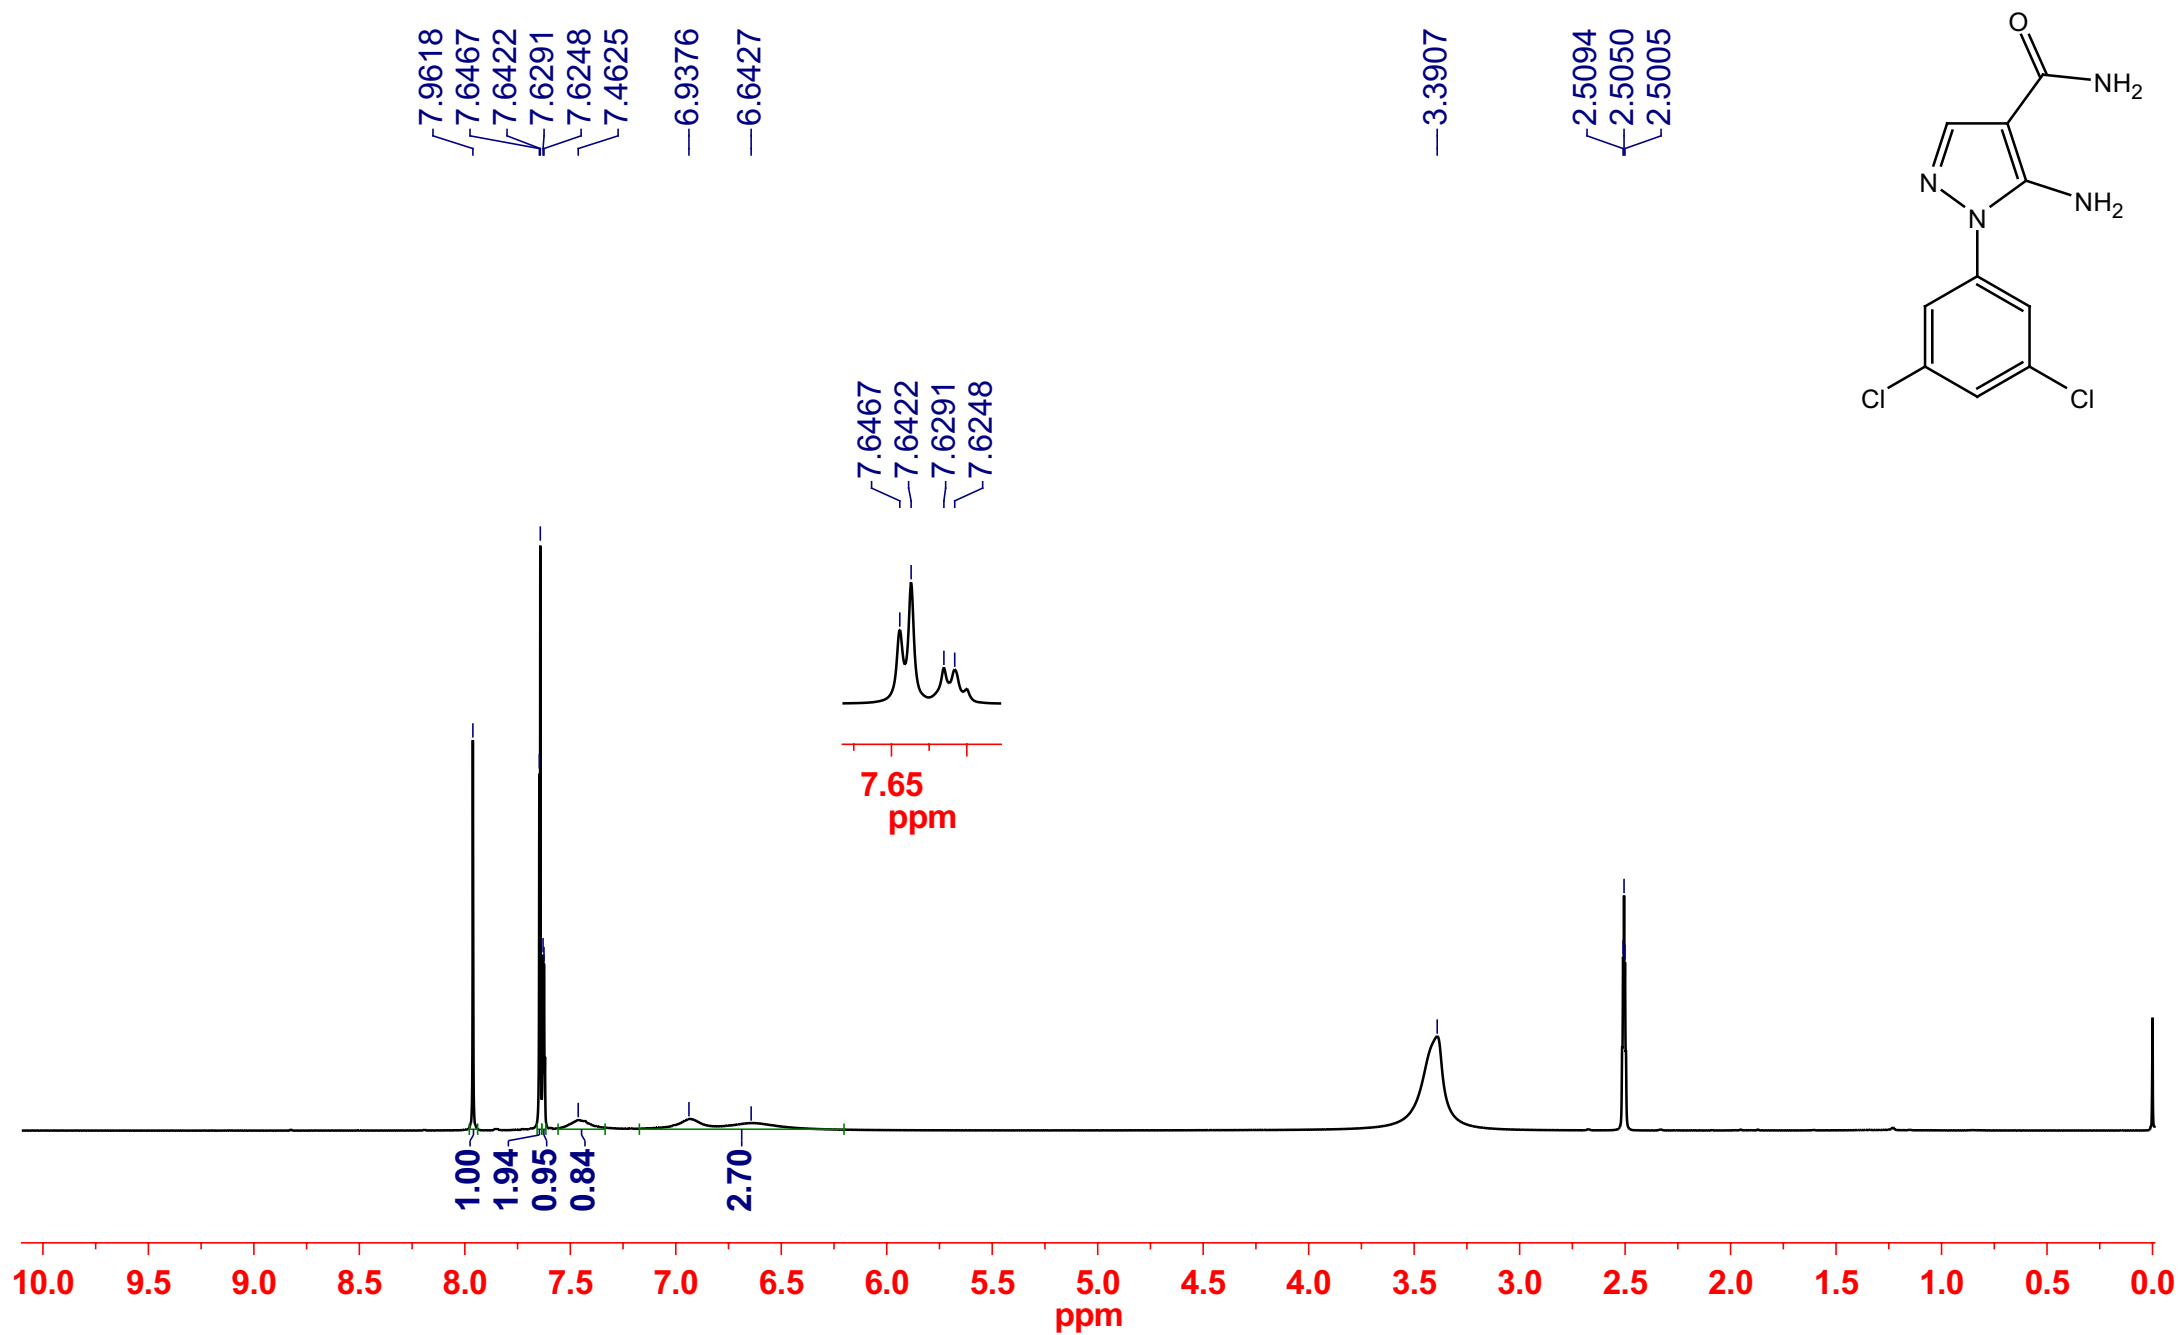

<sup>13</sup>C NMR of compound **2d**

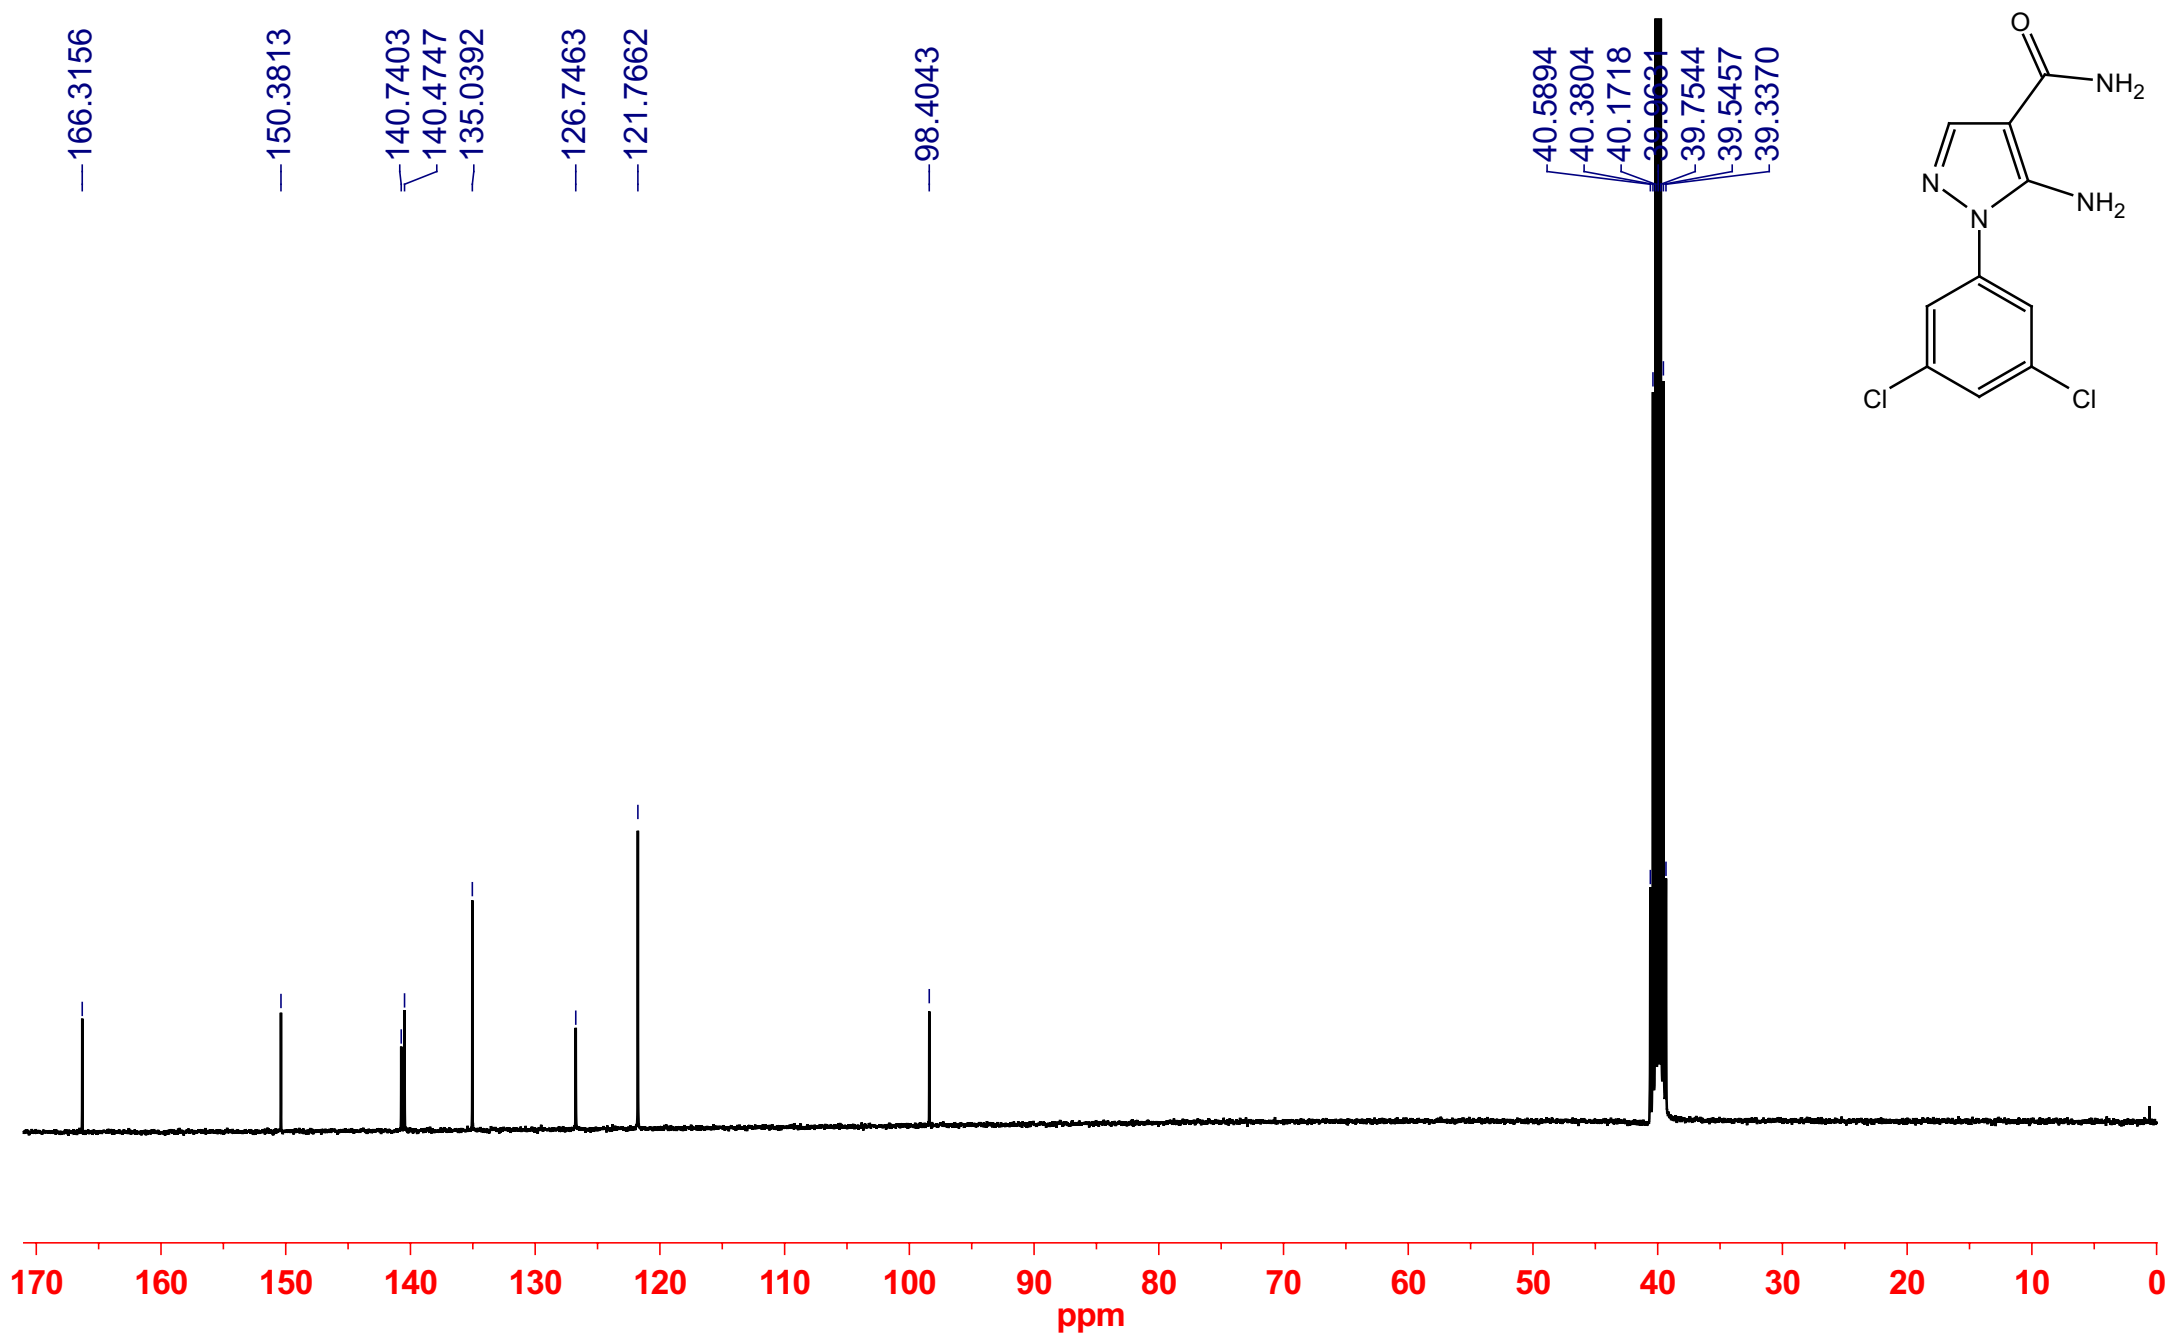

<sup>1</sup>H NMR of compound **2e**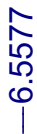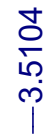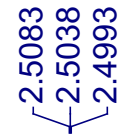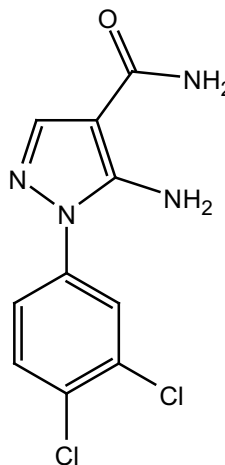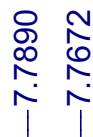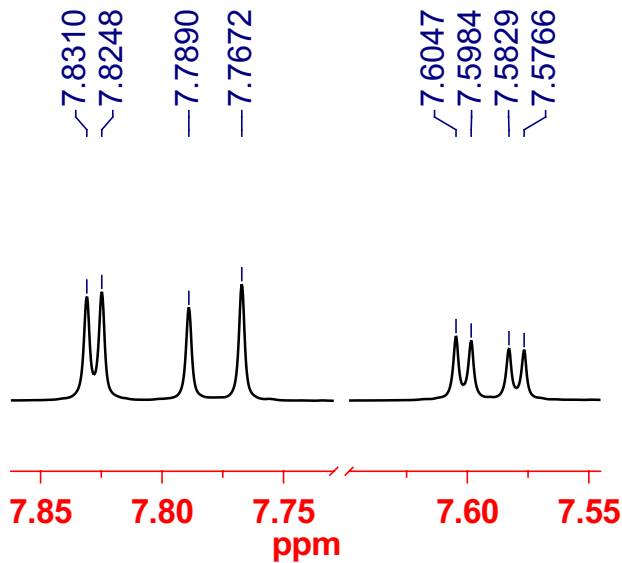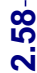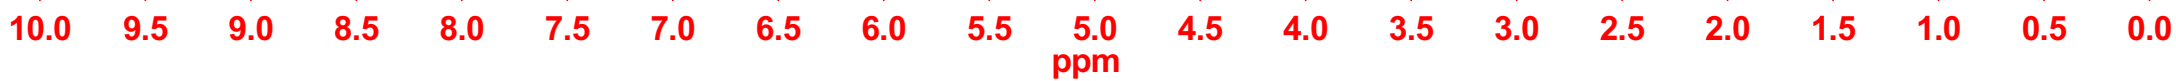

<sup>13</sup>C NMR of compound **2e**

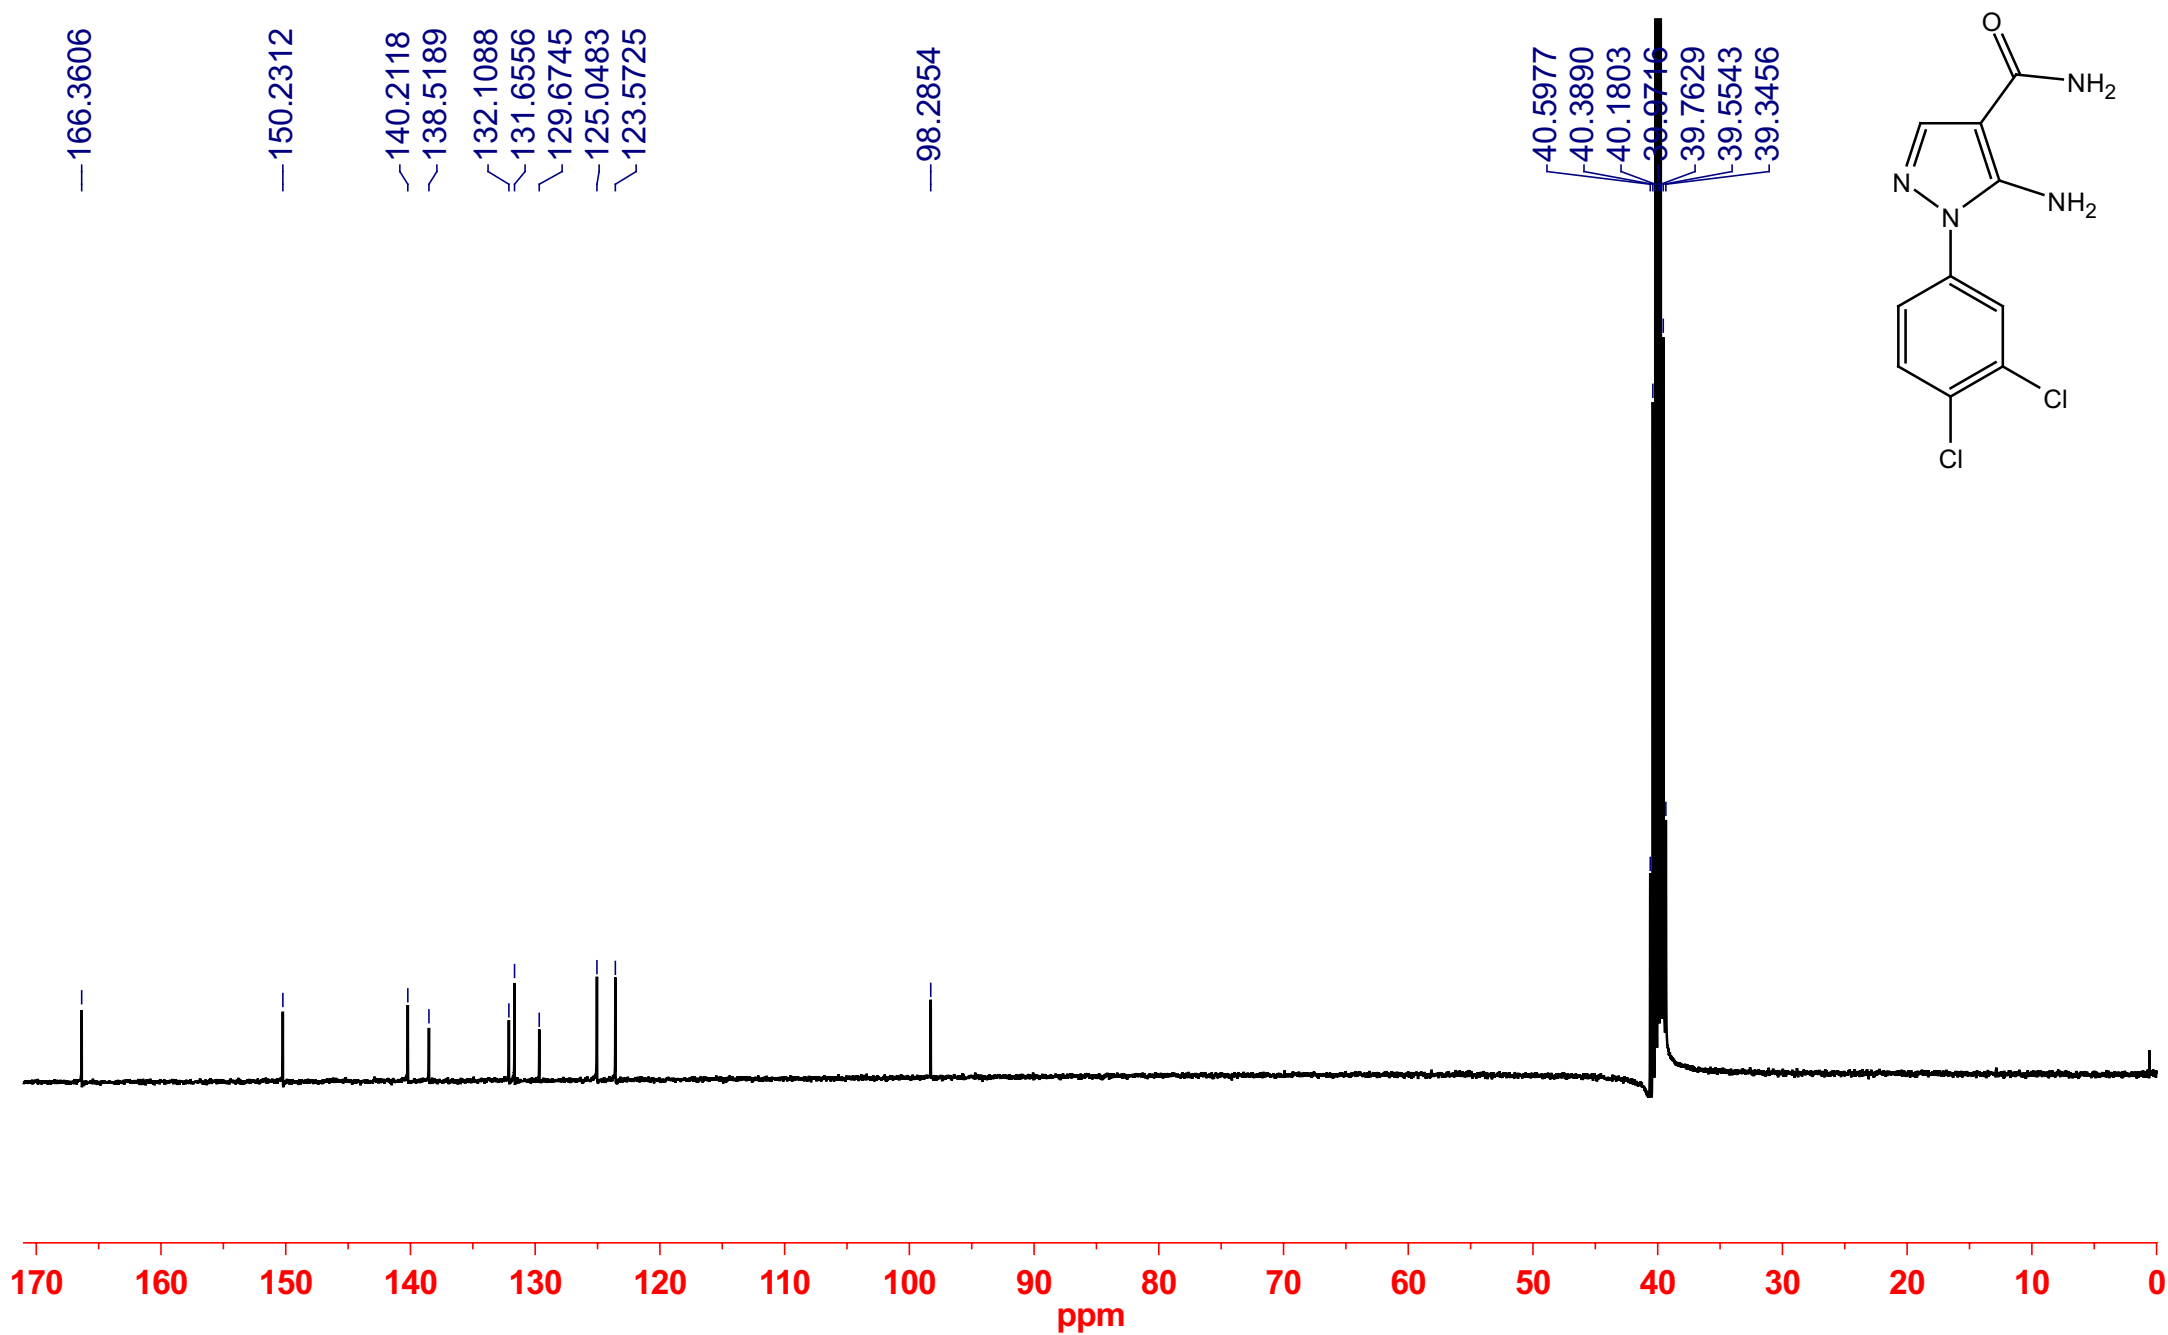

<sup>1</sup>H NMR of compound **2f**

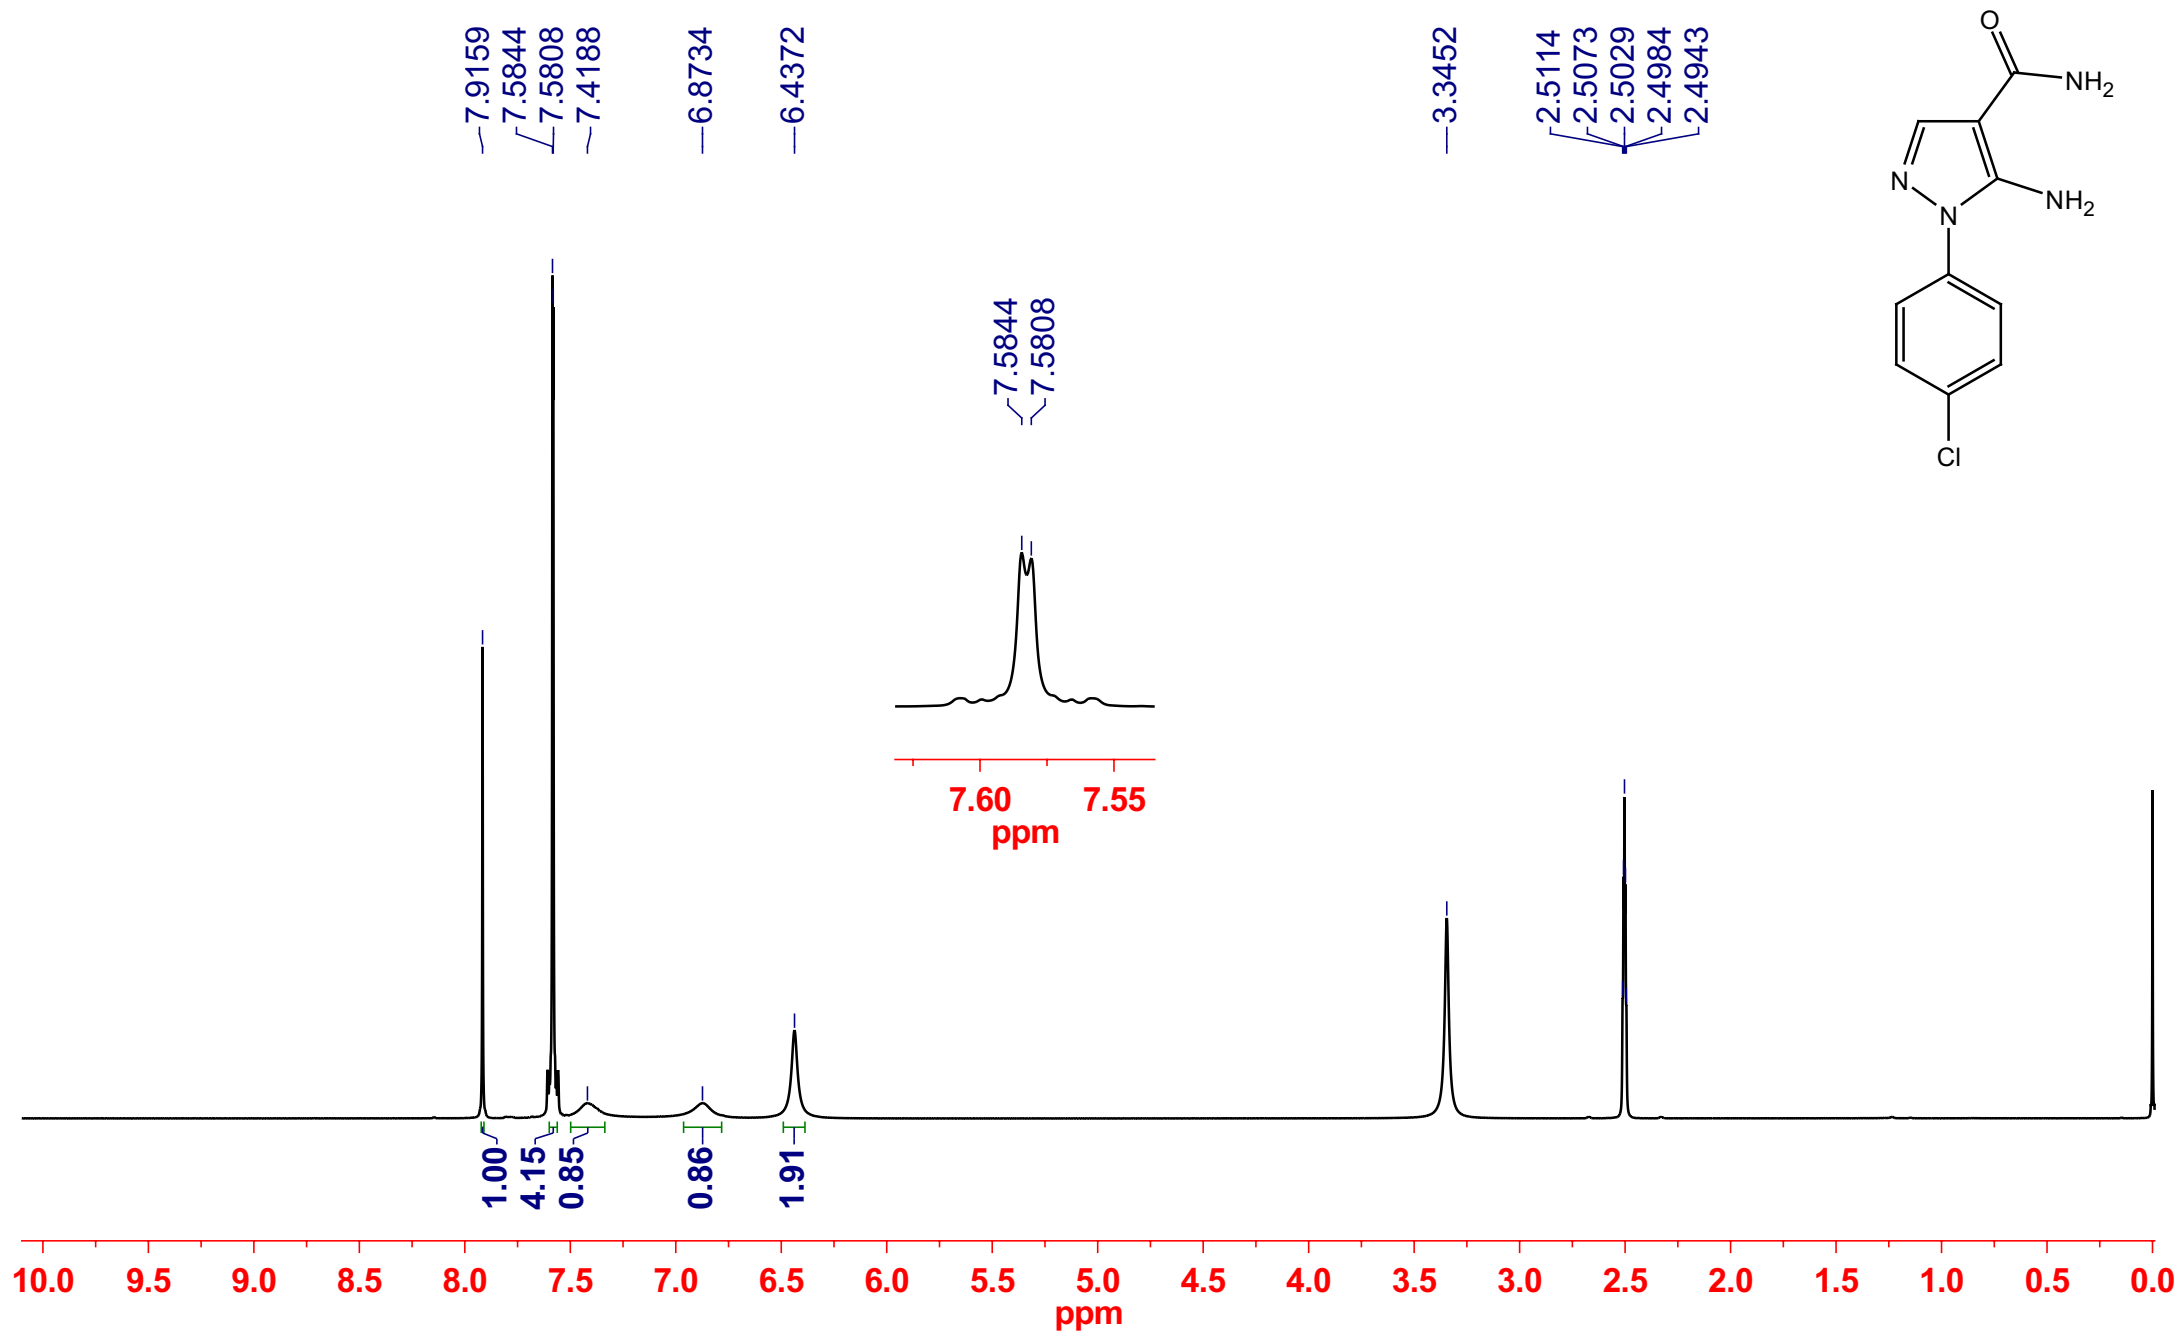

<sup>13</sup>C NMR of compound **2f**

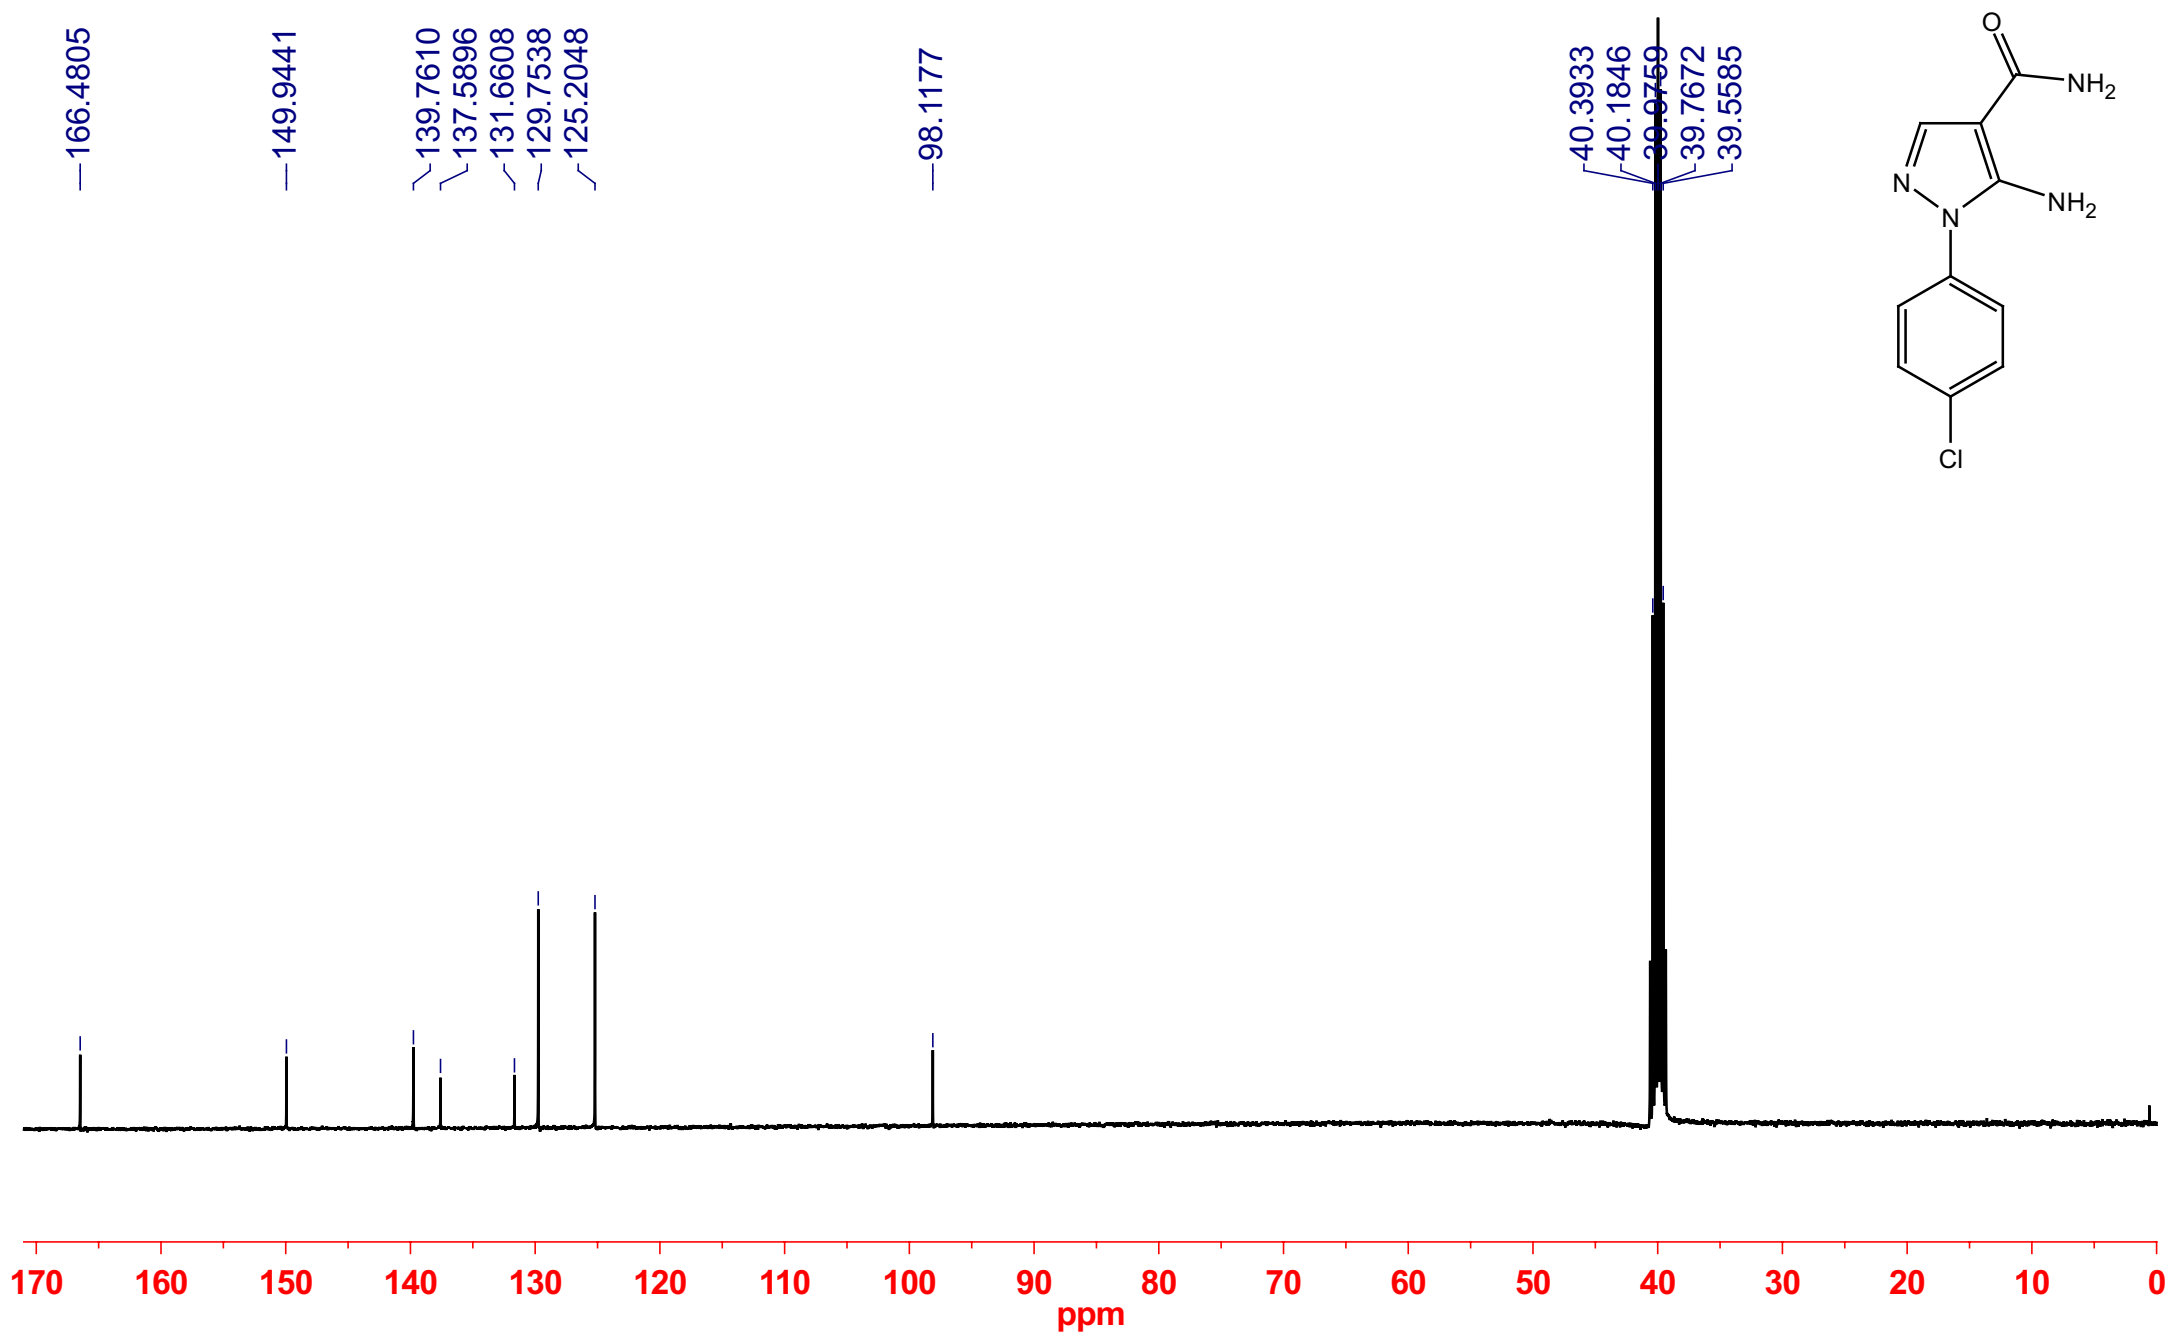



<sup>1</sup>H NMR of compound **2g**

7.8903  
7.5940  
7.5885  
7.5817  
7.5767  
7.5714  
7.5646  
7.5591  
7.3781  
7.3562  
7.3339  
6.8482

6.3548

3.3441

2.5073  
2.5028  
2.4983

7.5940  
7.5885  
7.5817  
7.5767  
7.5714  
7.5646  
7.5591  
7.3781  
7.3562  
7.3339

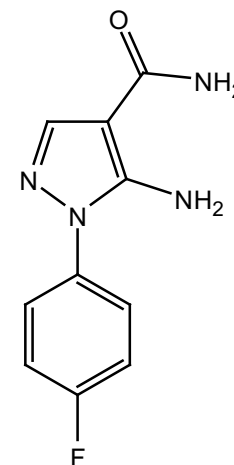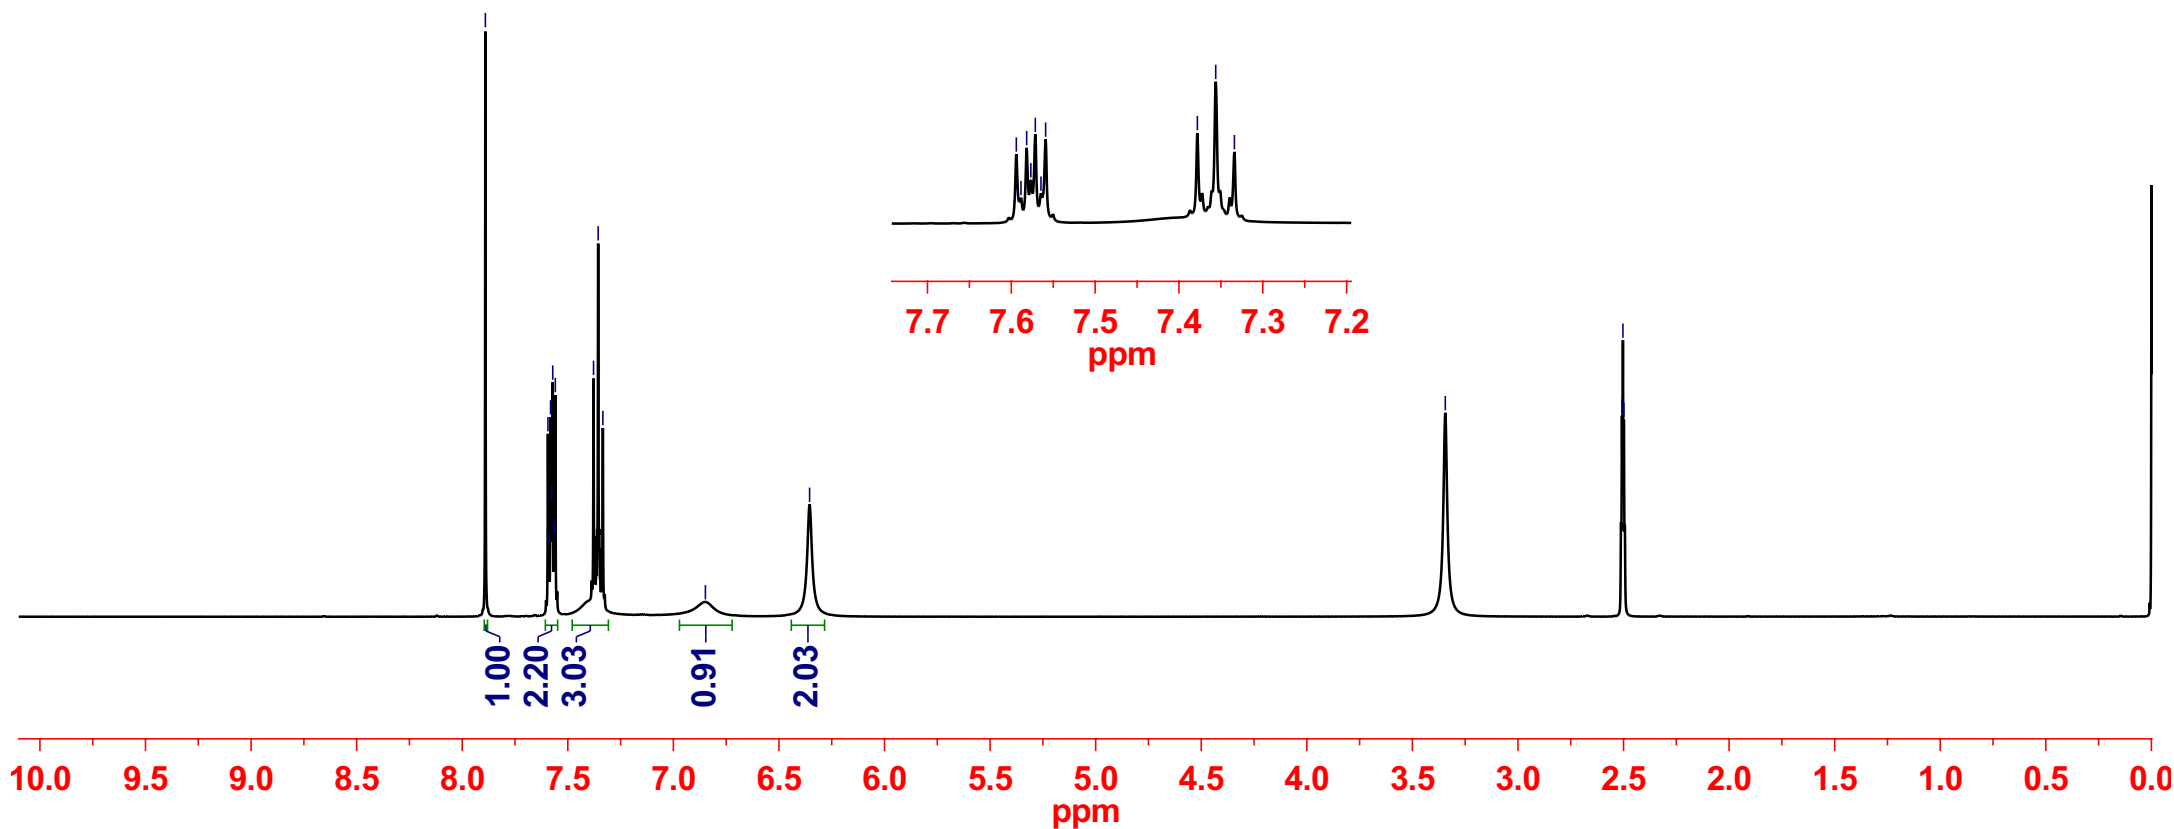

<sup>13</sup>C NMR of compound **2g**

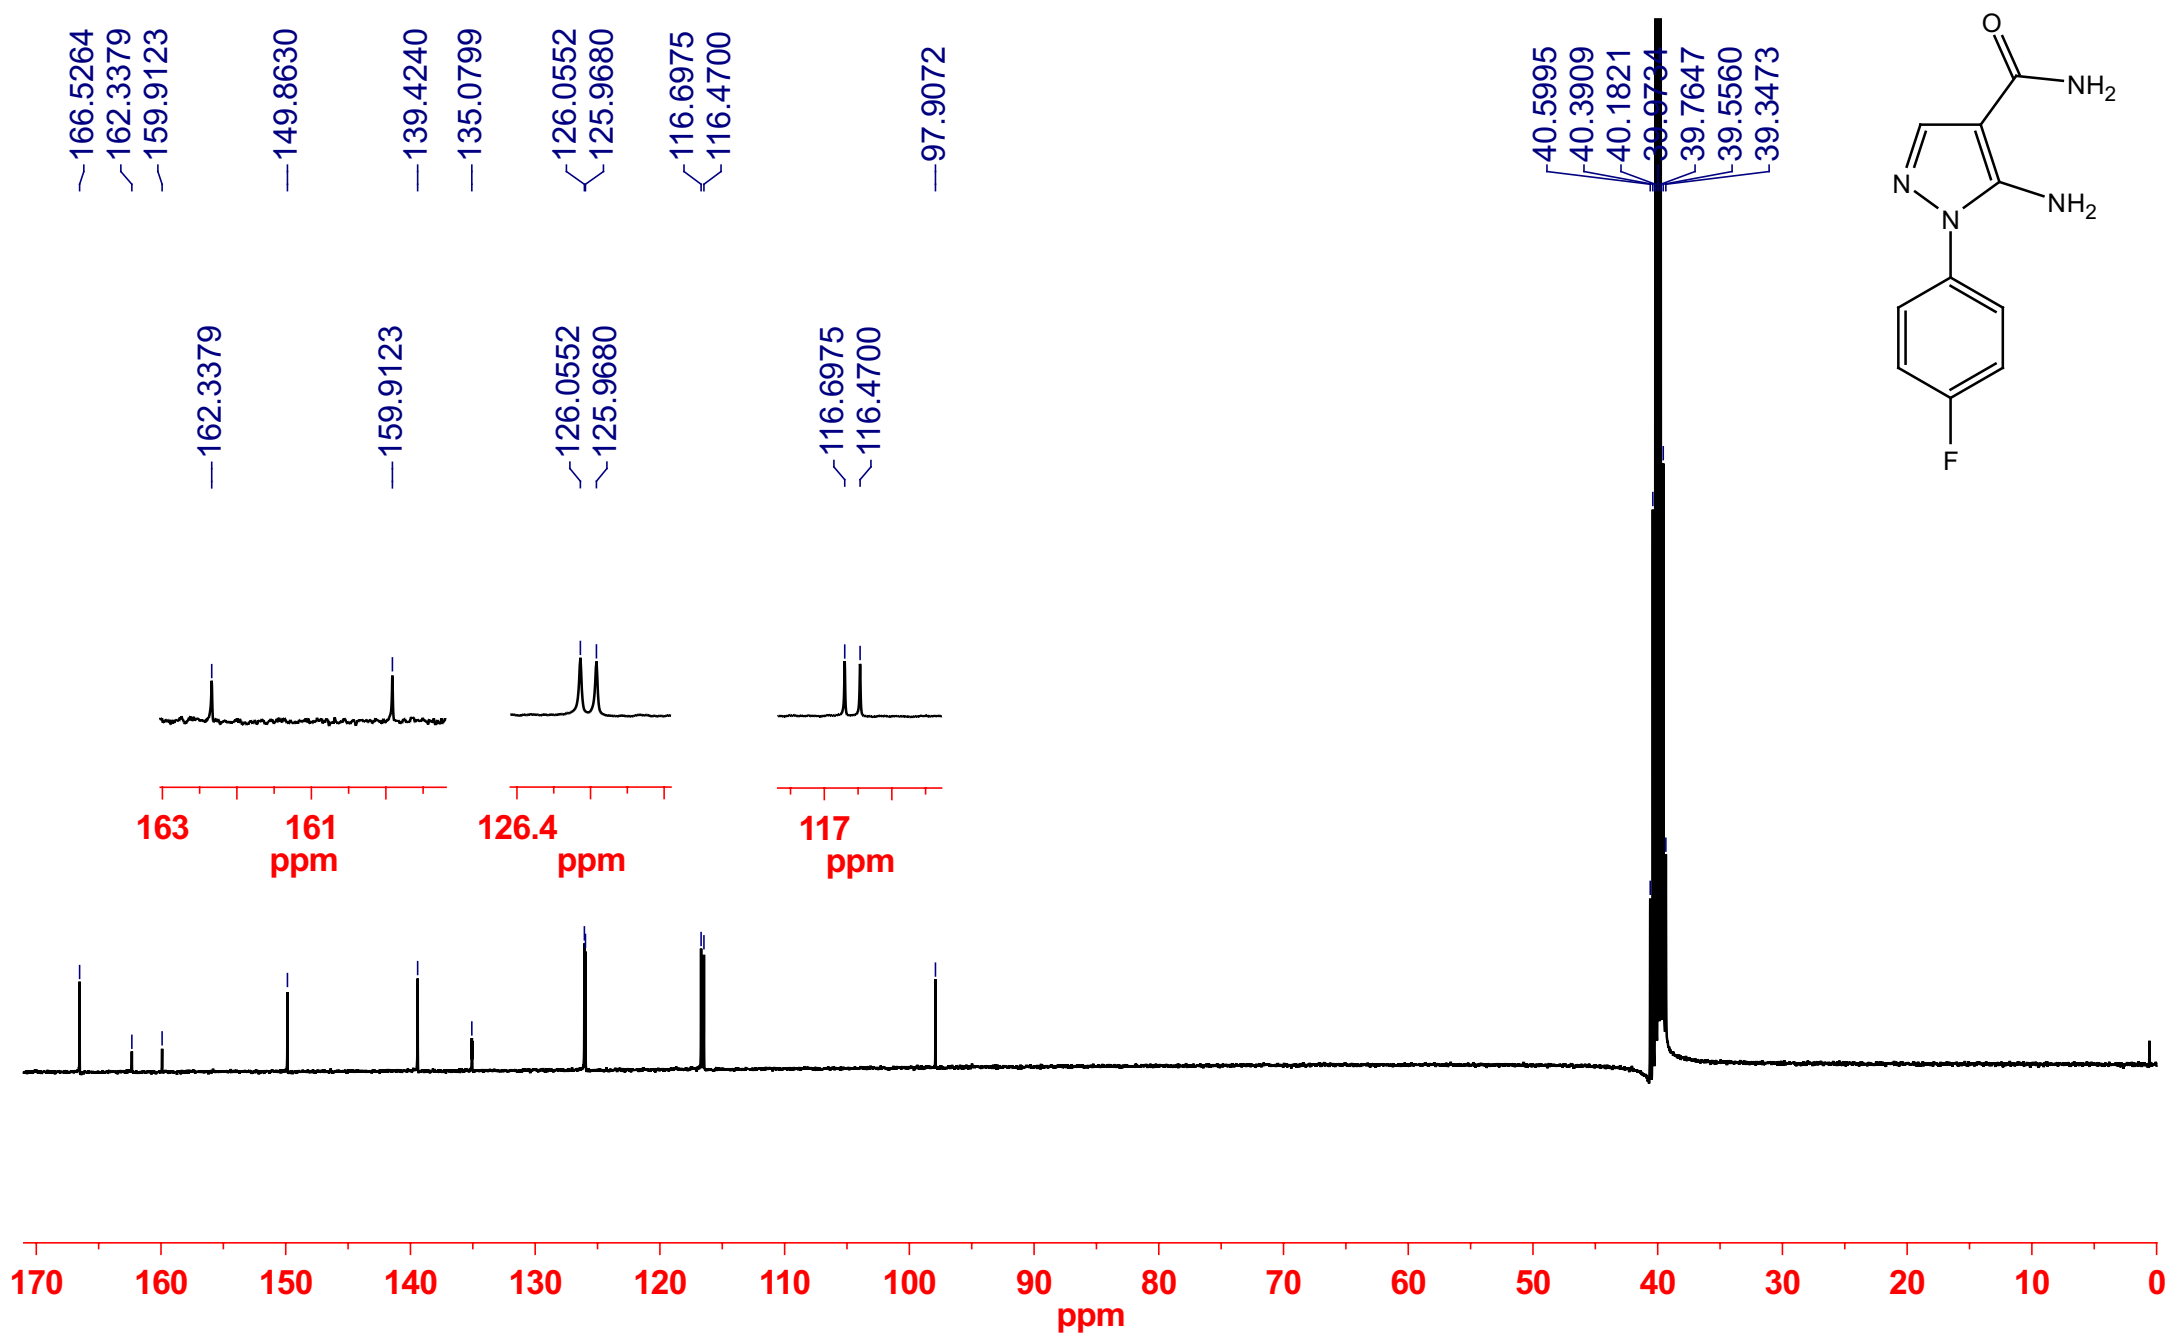

<sup>1</sup>H NMR of compound **2h**

7.9304  
7.5819  
7.5661  
7.5527  
7.5365  
7.4529  
7.4368  
7.4167  
7.4126  
7.2421  
7.2380  
7.2247  
7.2081  
7.2044  
6.8780  
6.5121

7.5661  
7.5527  
7.5365  
7.4529  
7.4368  
7.4167  
7.4126  
7.2421  
7.2380  
7.2247  
7.2081  
7.2044

3.3403

2.5026

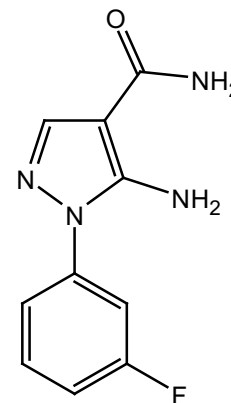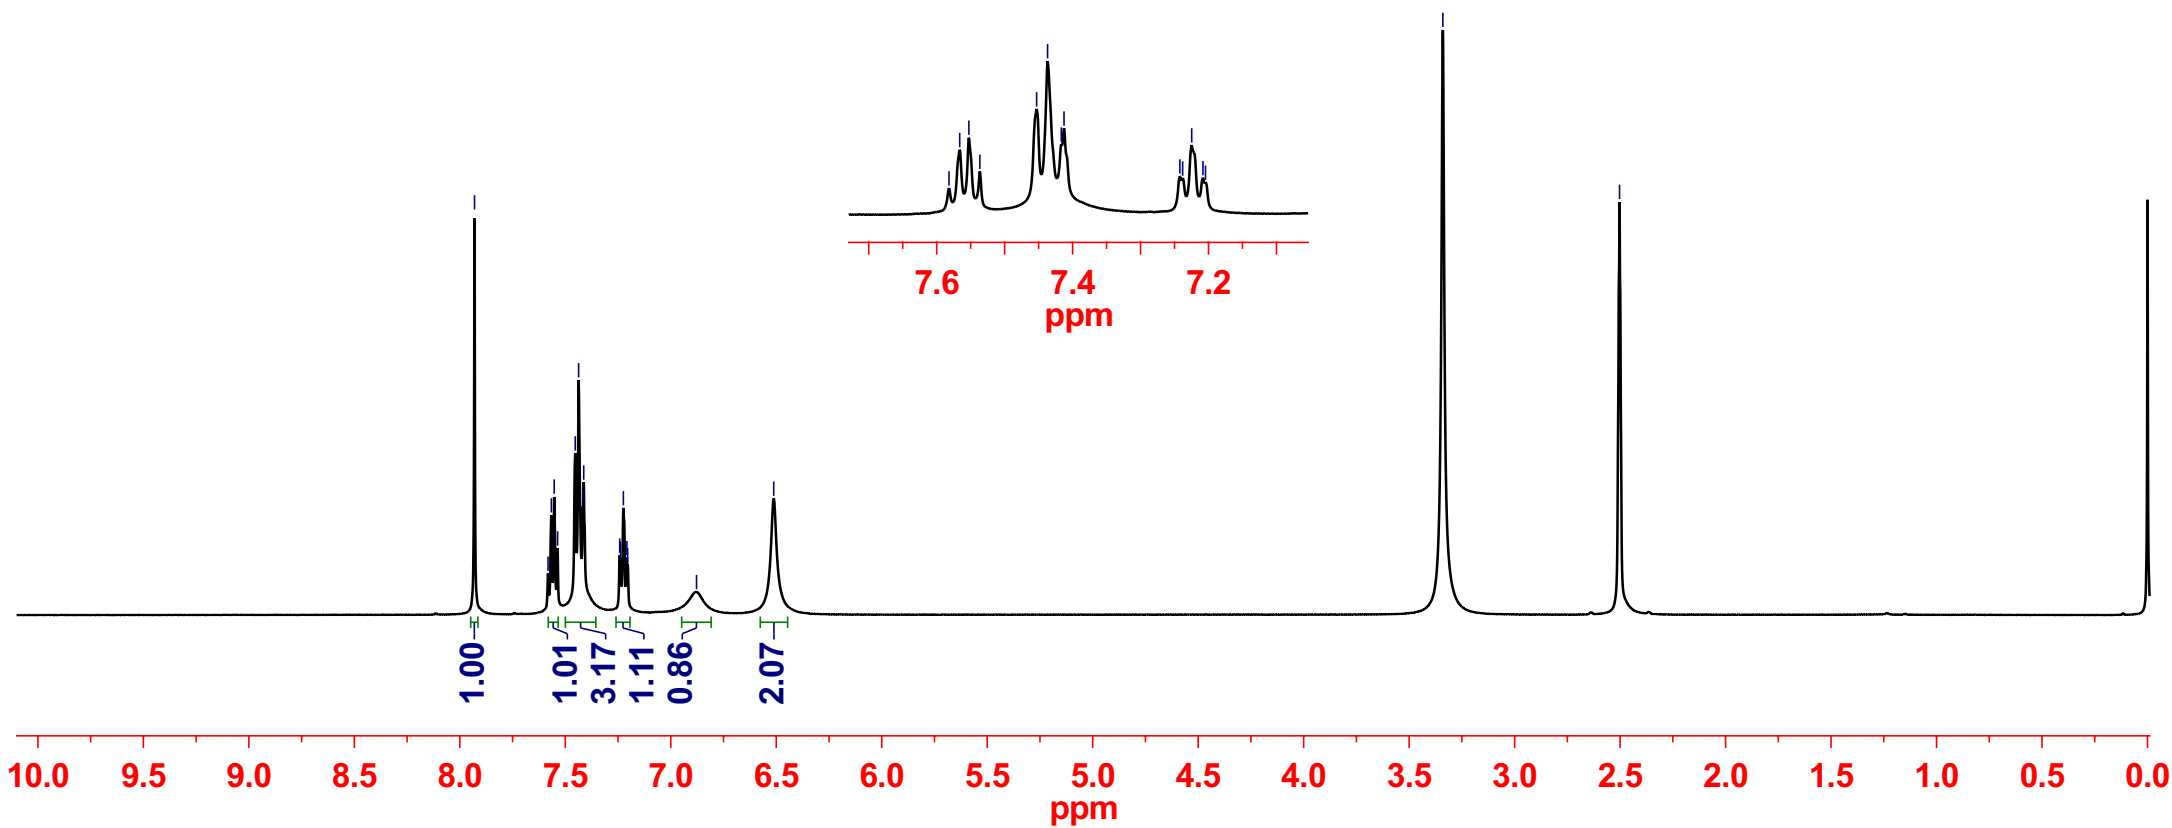

<sup>13</sup>C NMR of compound **2h**

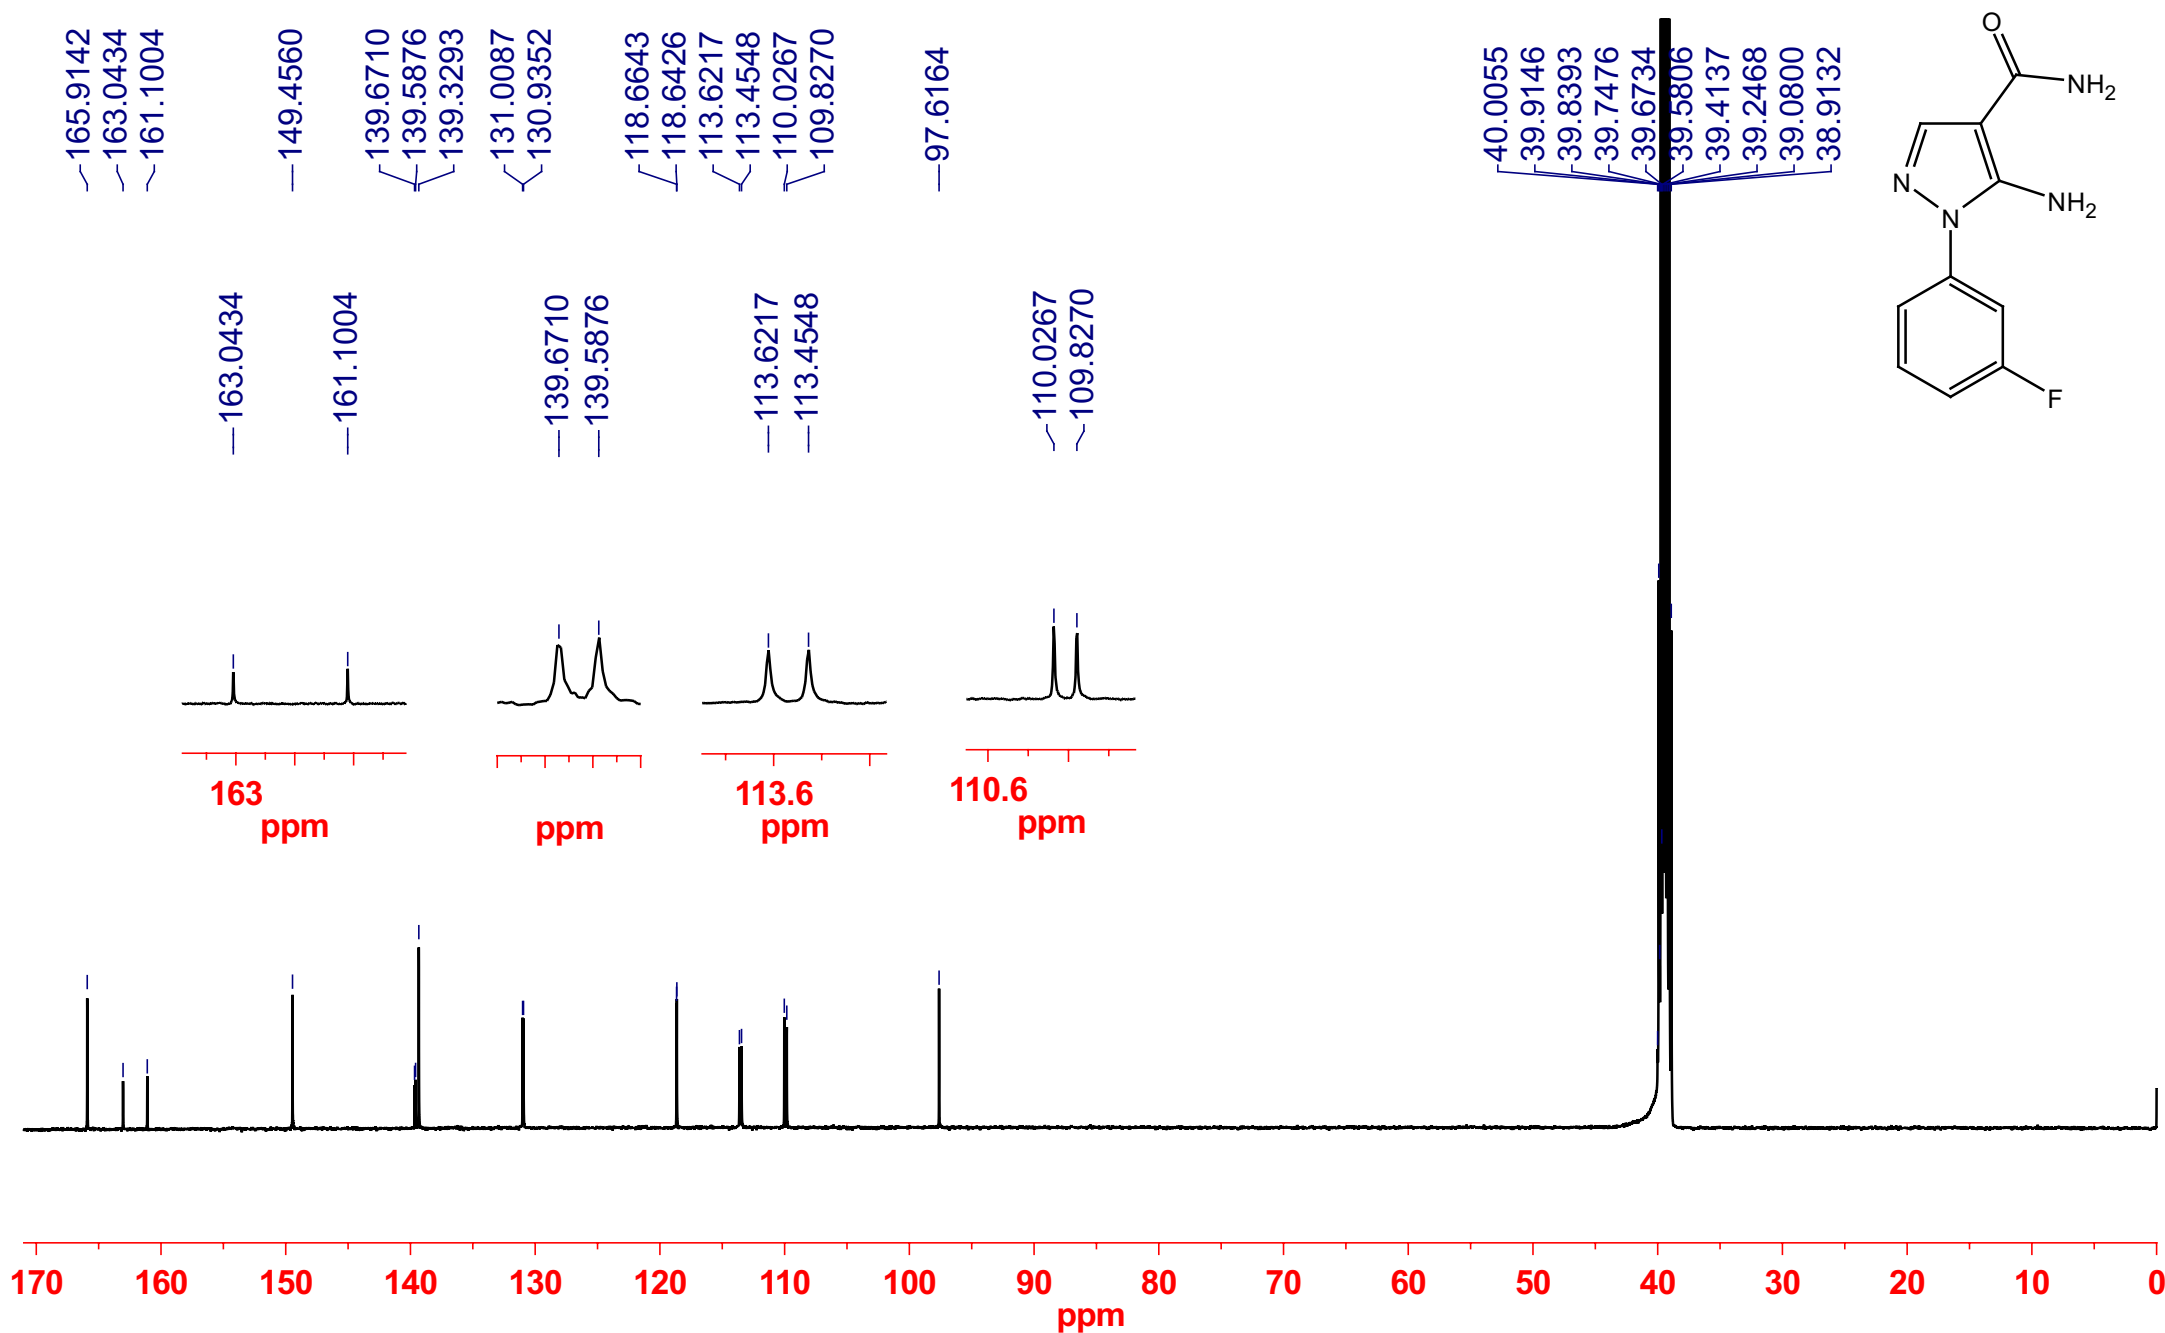

<sup>1</sup>H NMR of compound **2i**

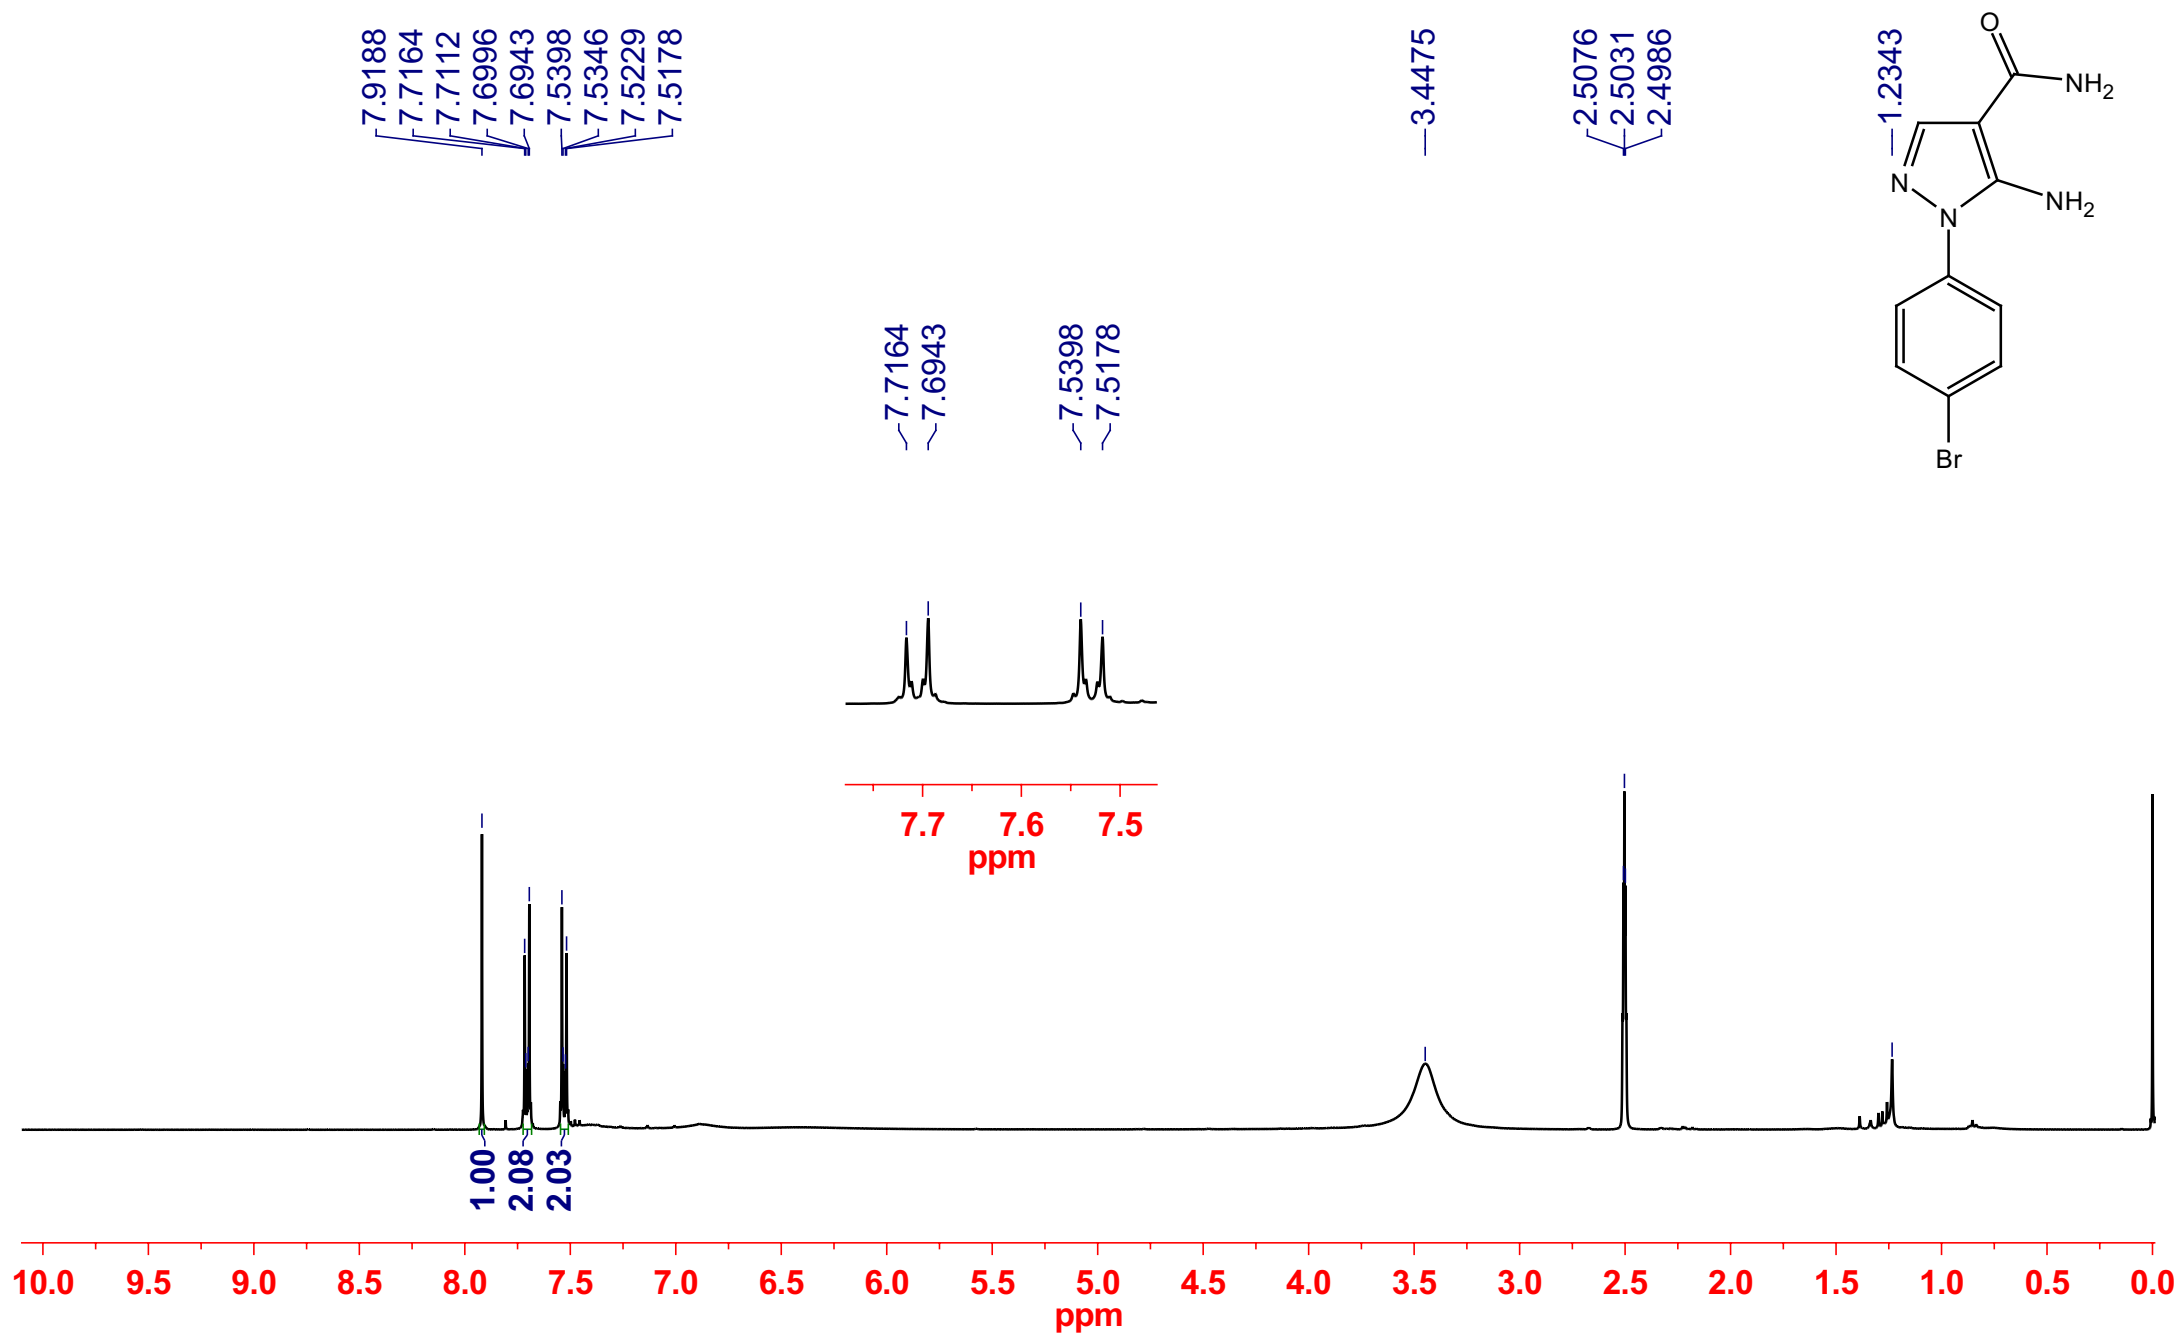

$^{13}\text{C}$  NMR of compound **2i**

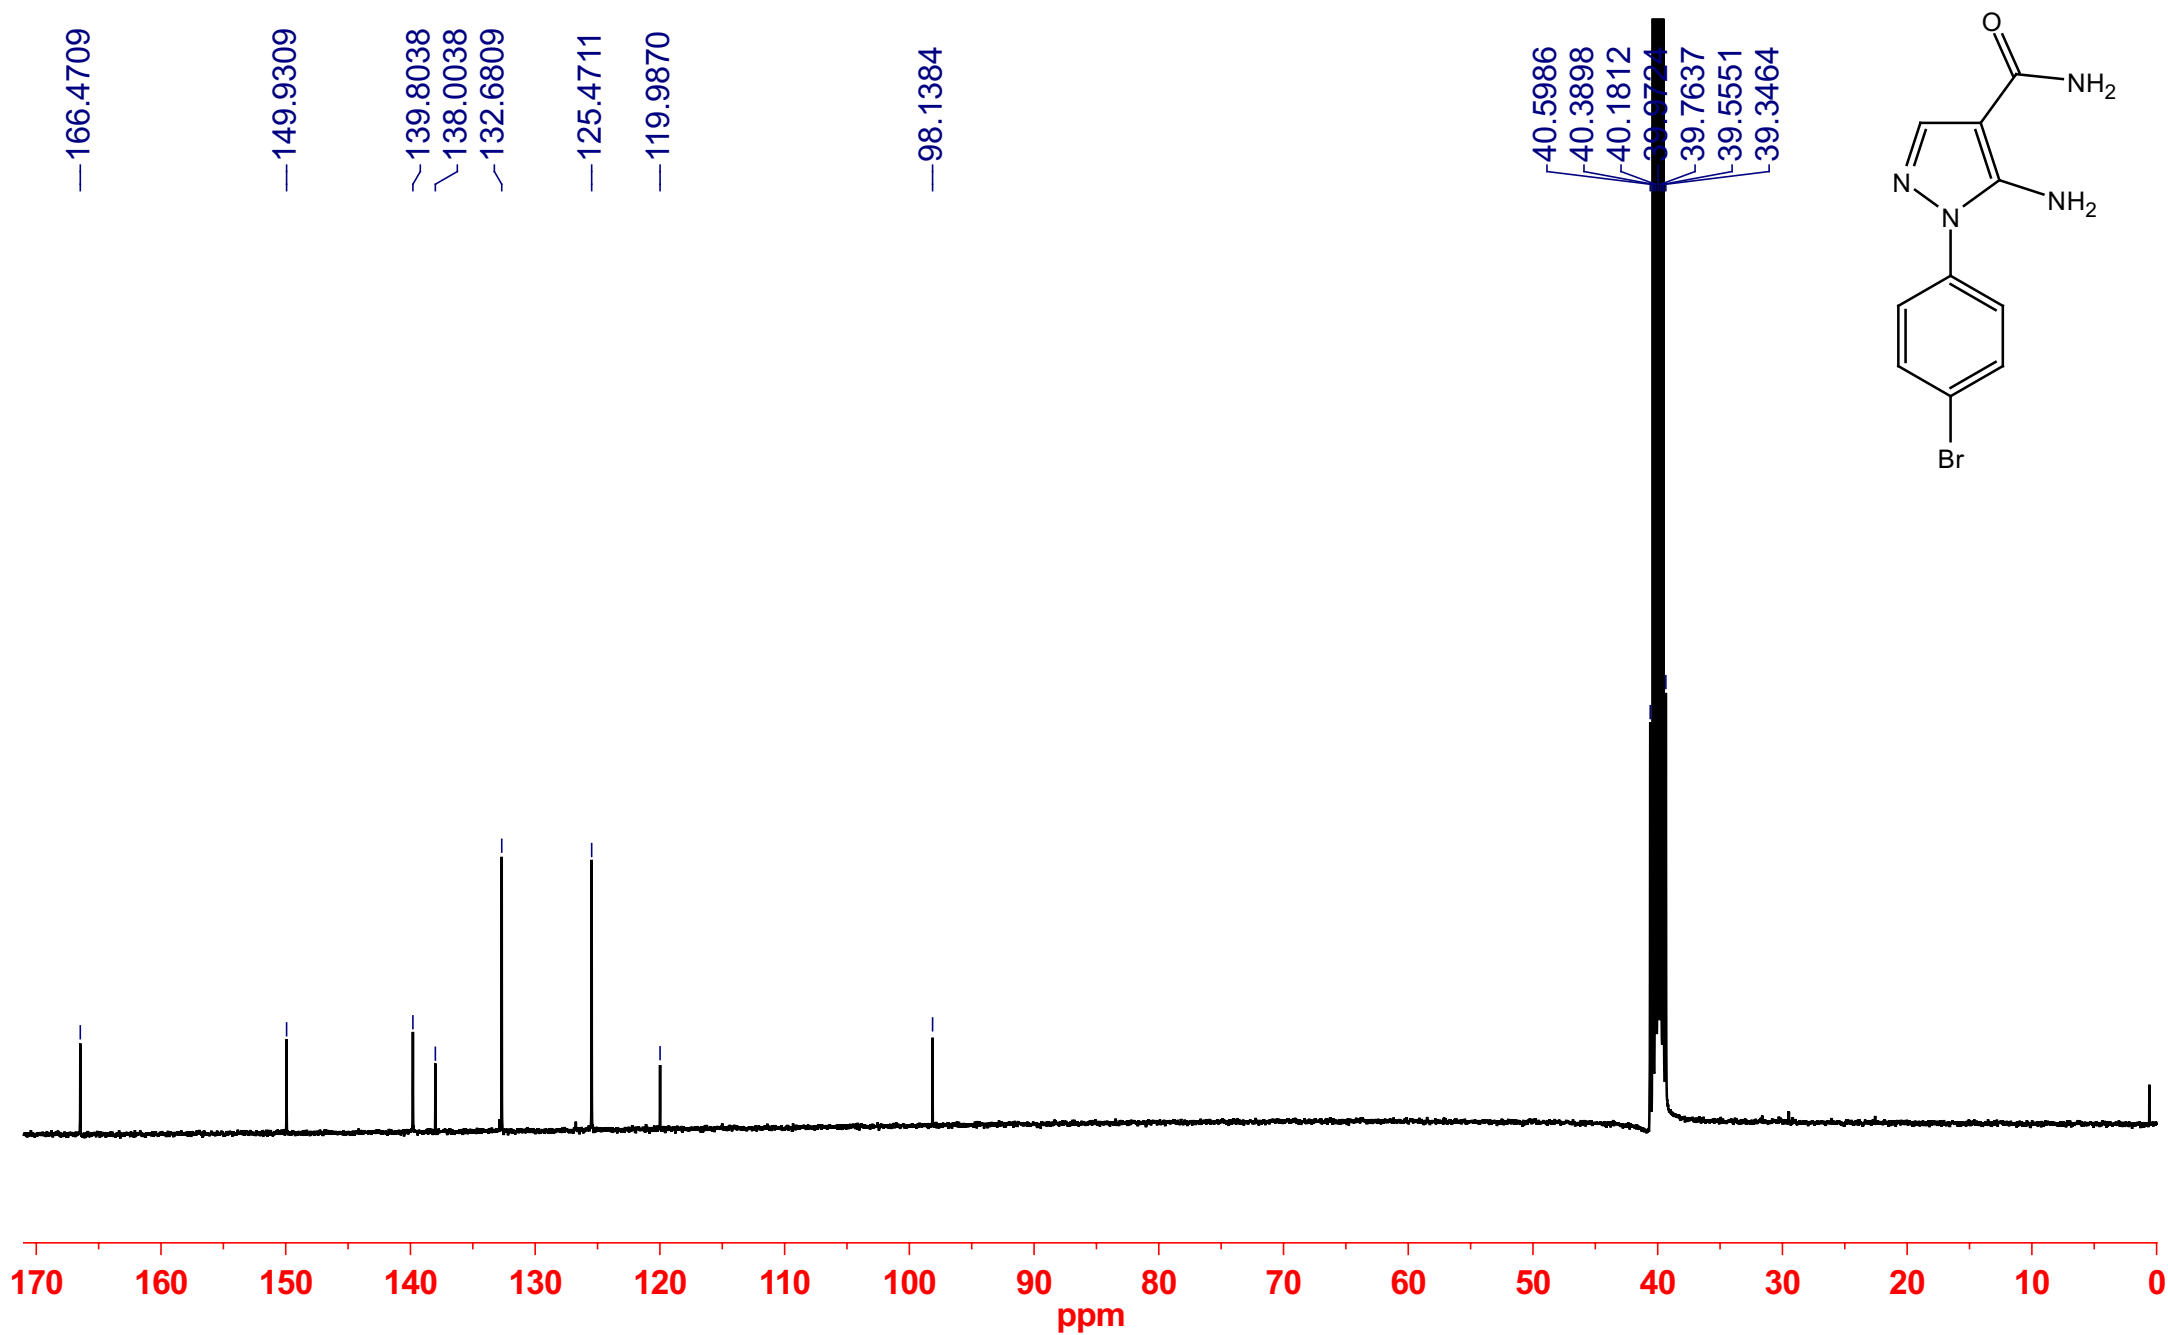

<sup>1</sup>H NMR of compound **2j**

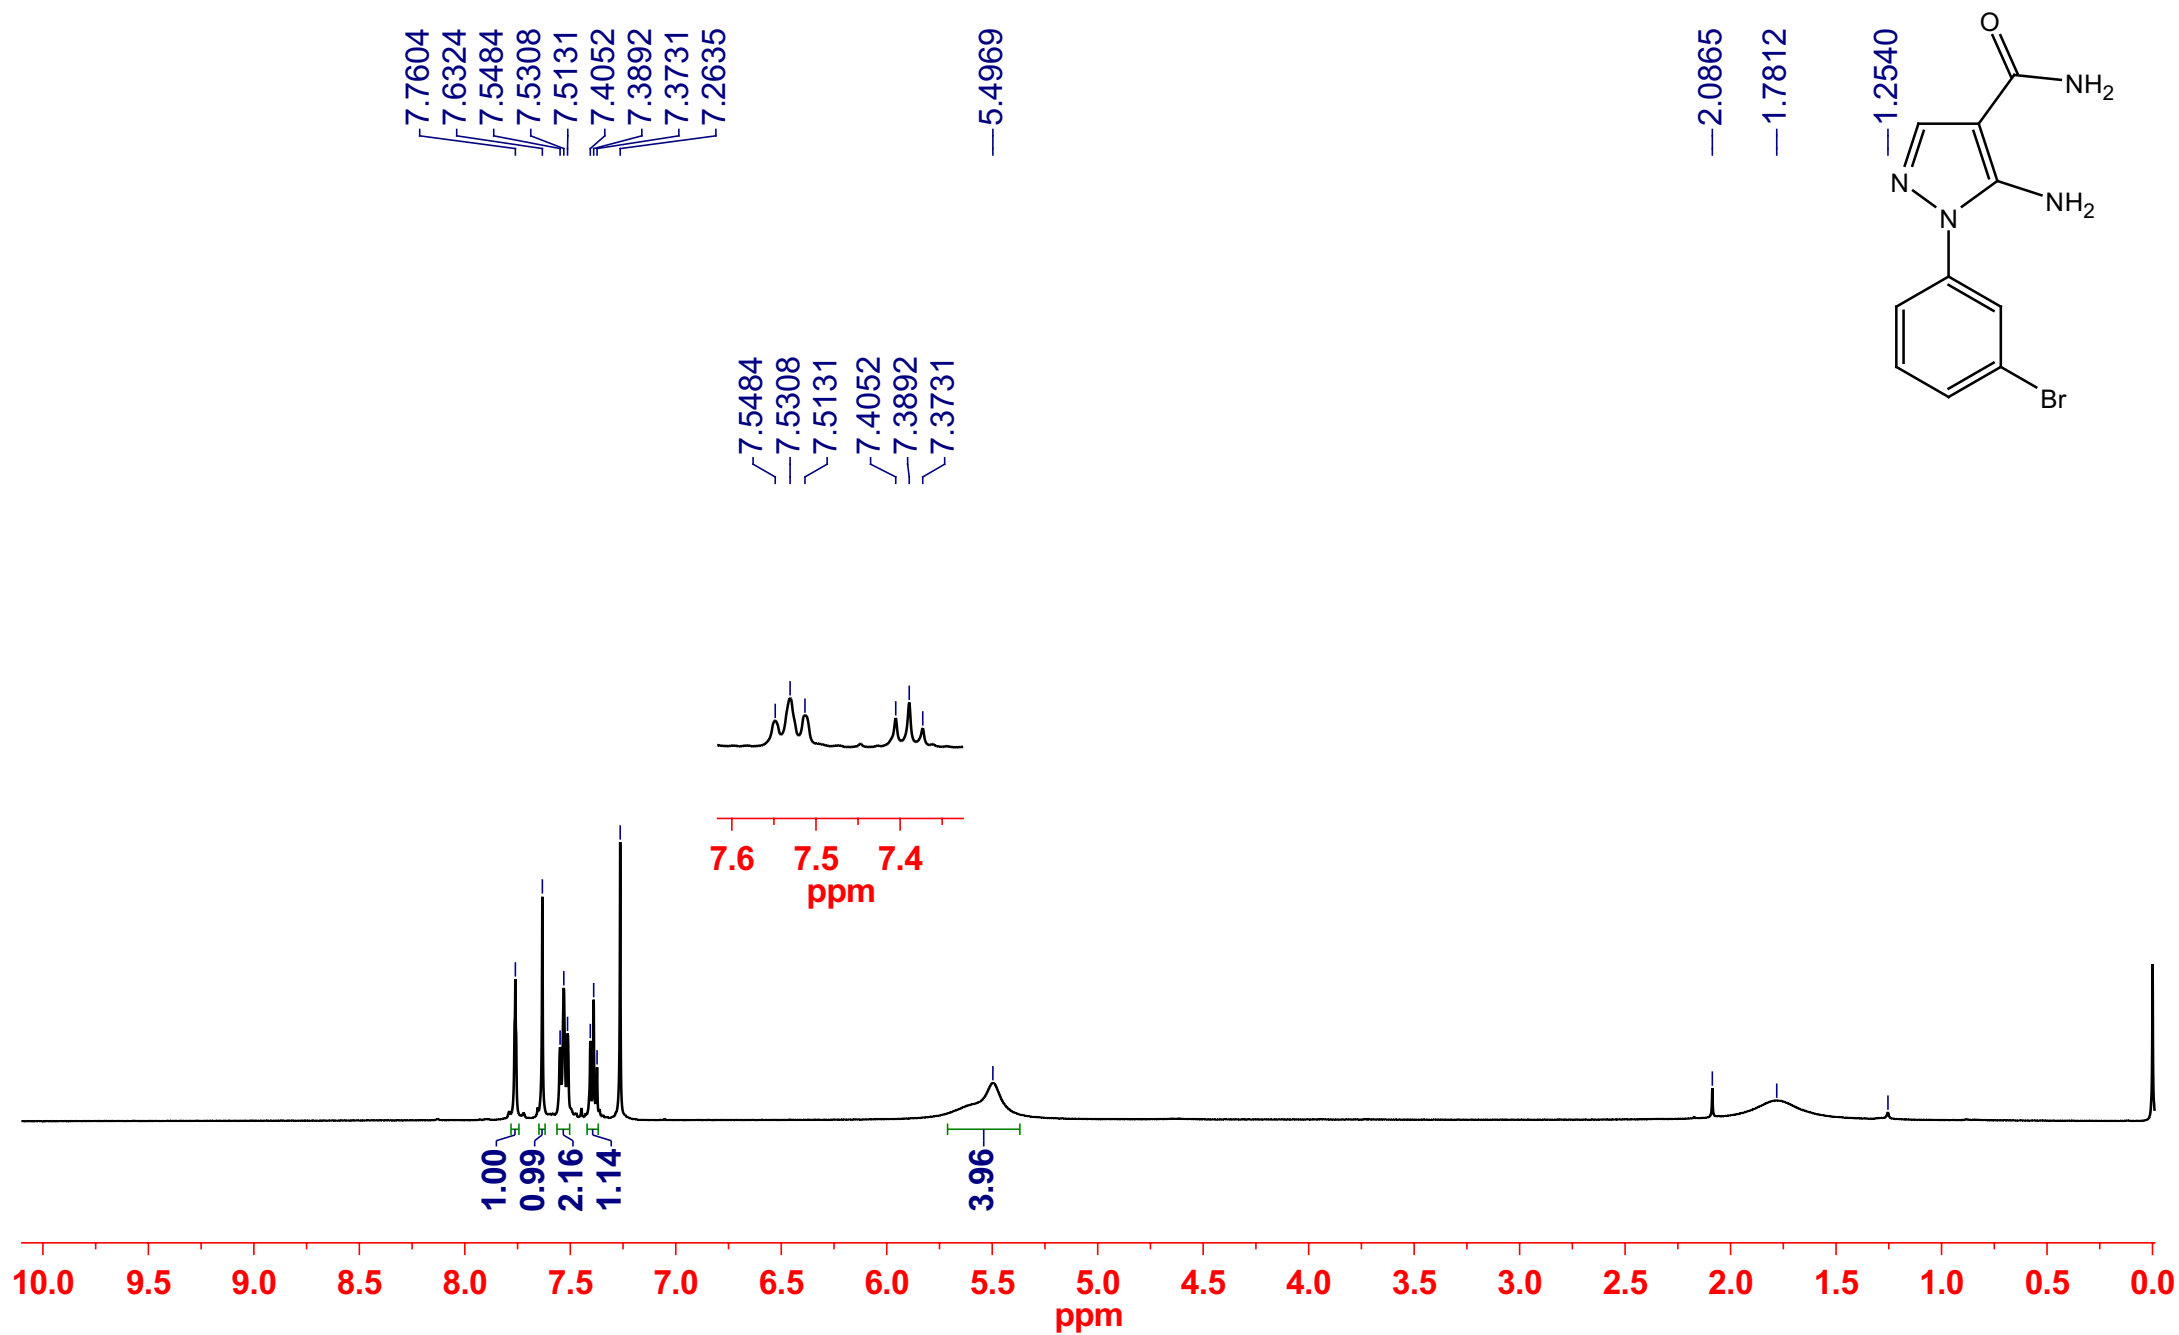

<sup>13</sup>C NMR of compound **2j**

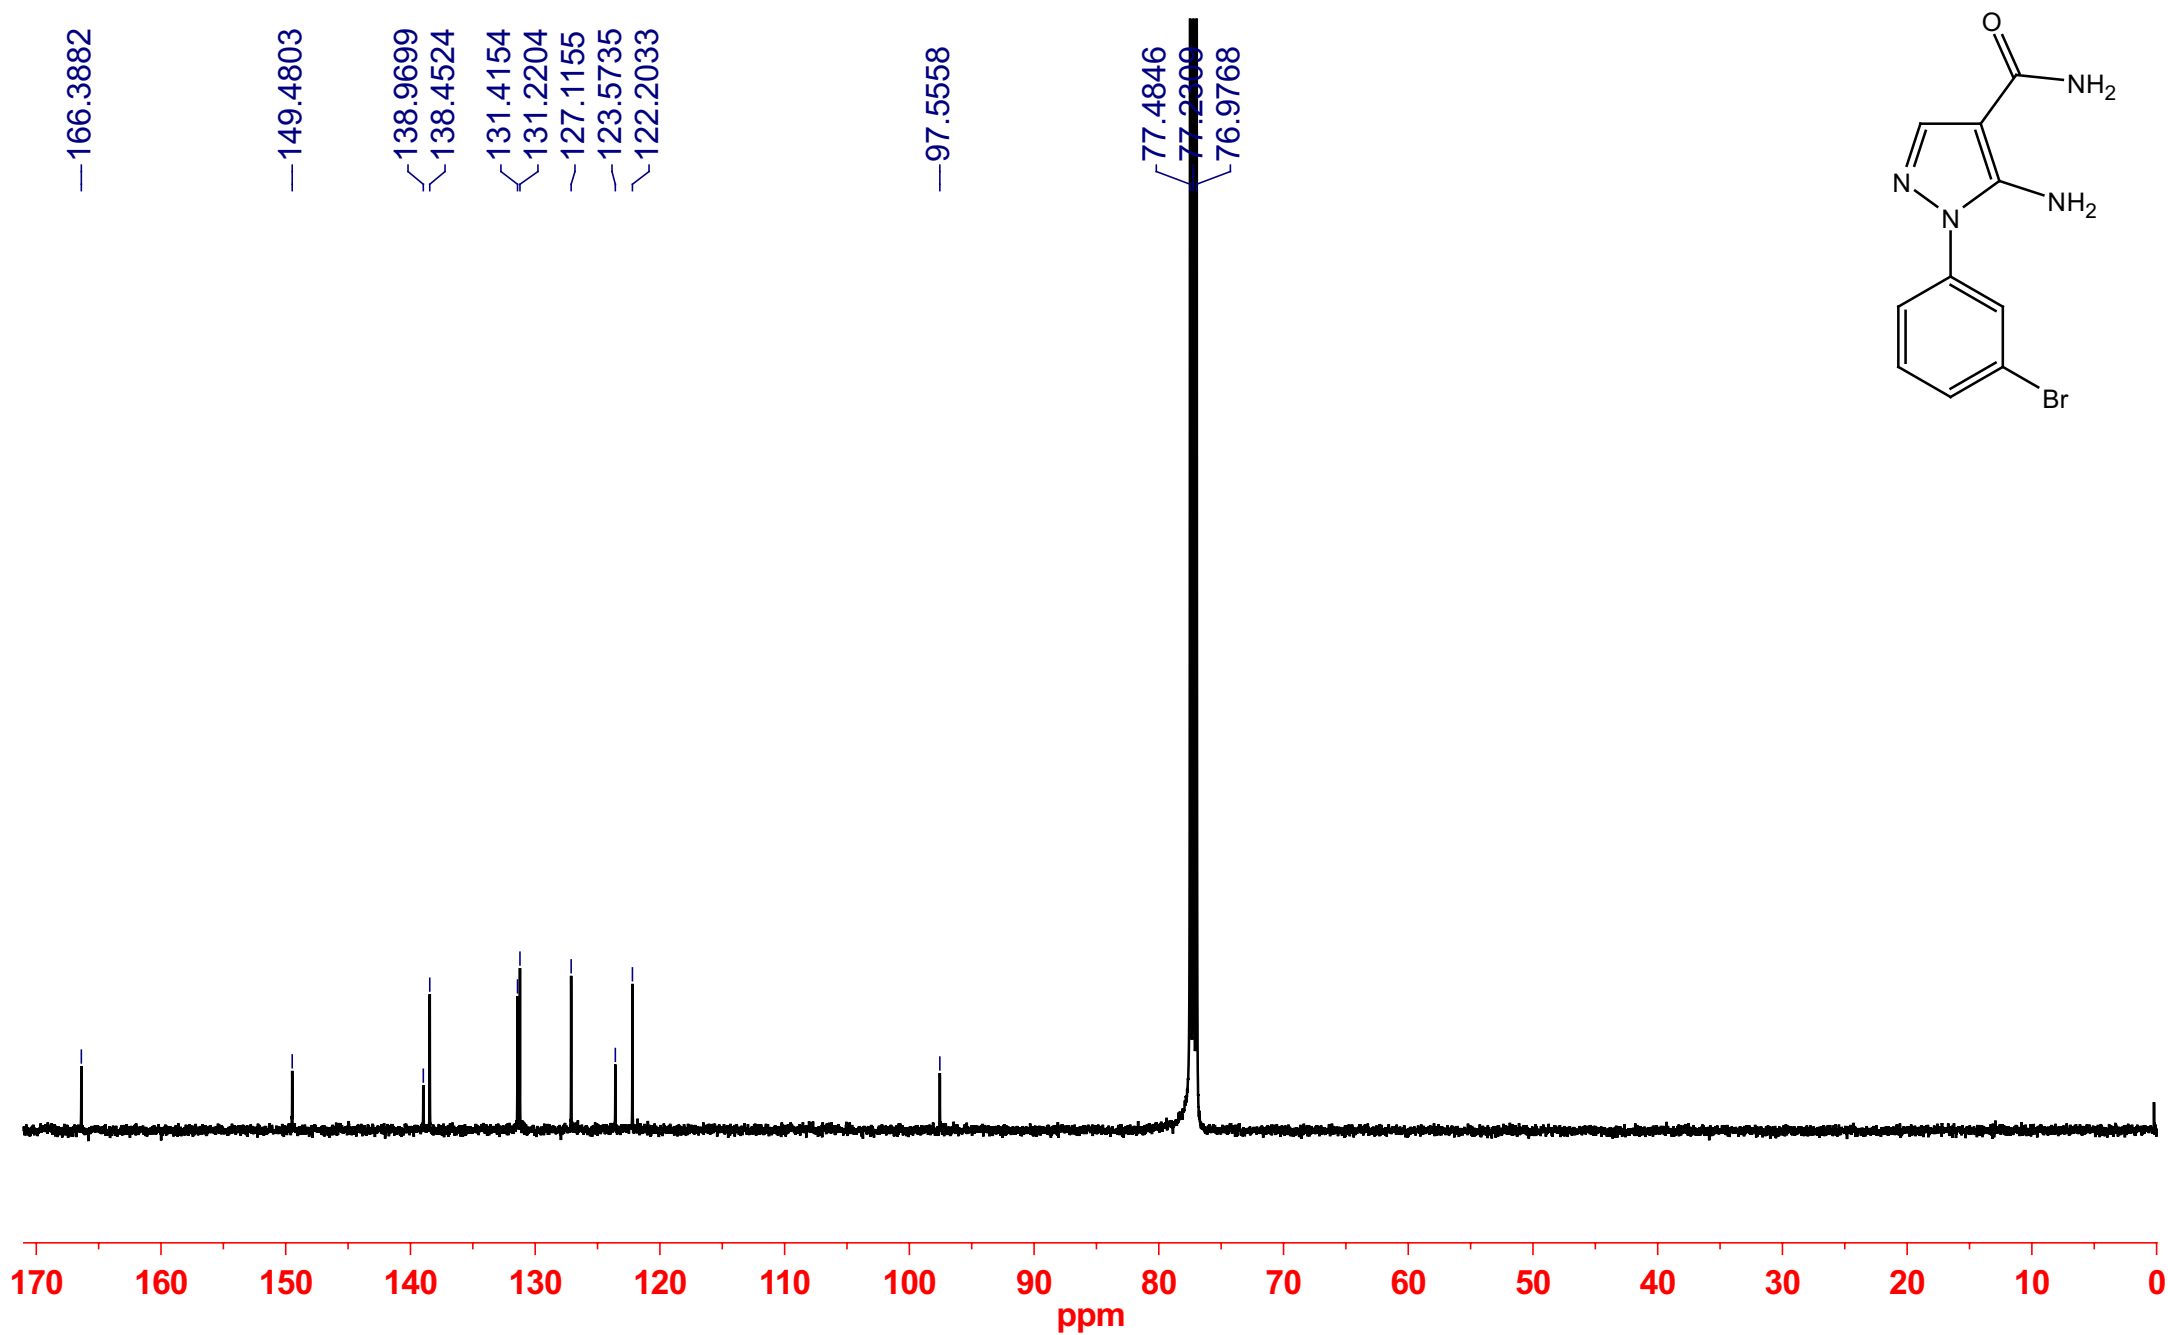



<sup>1</sup>H NMR of compound **2k**

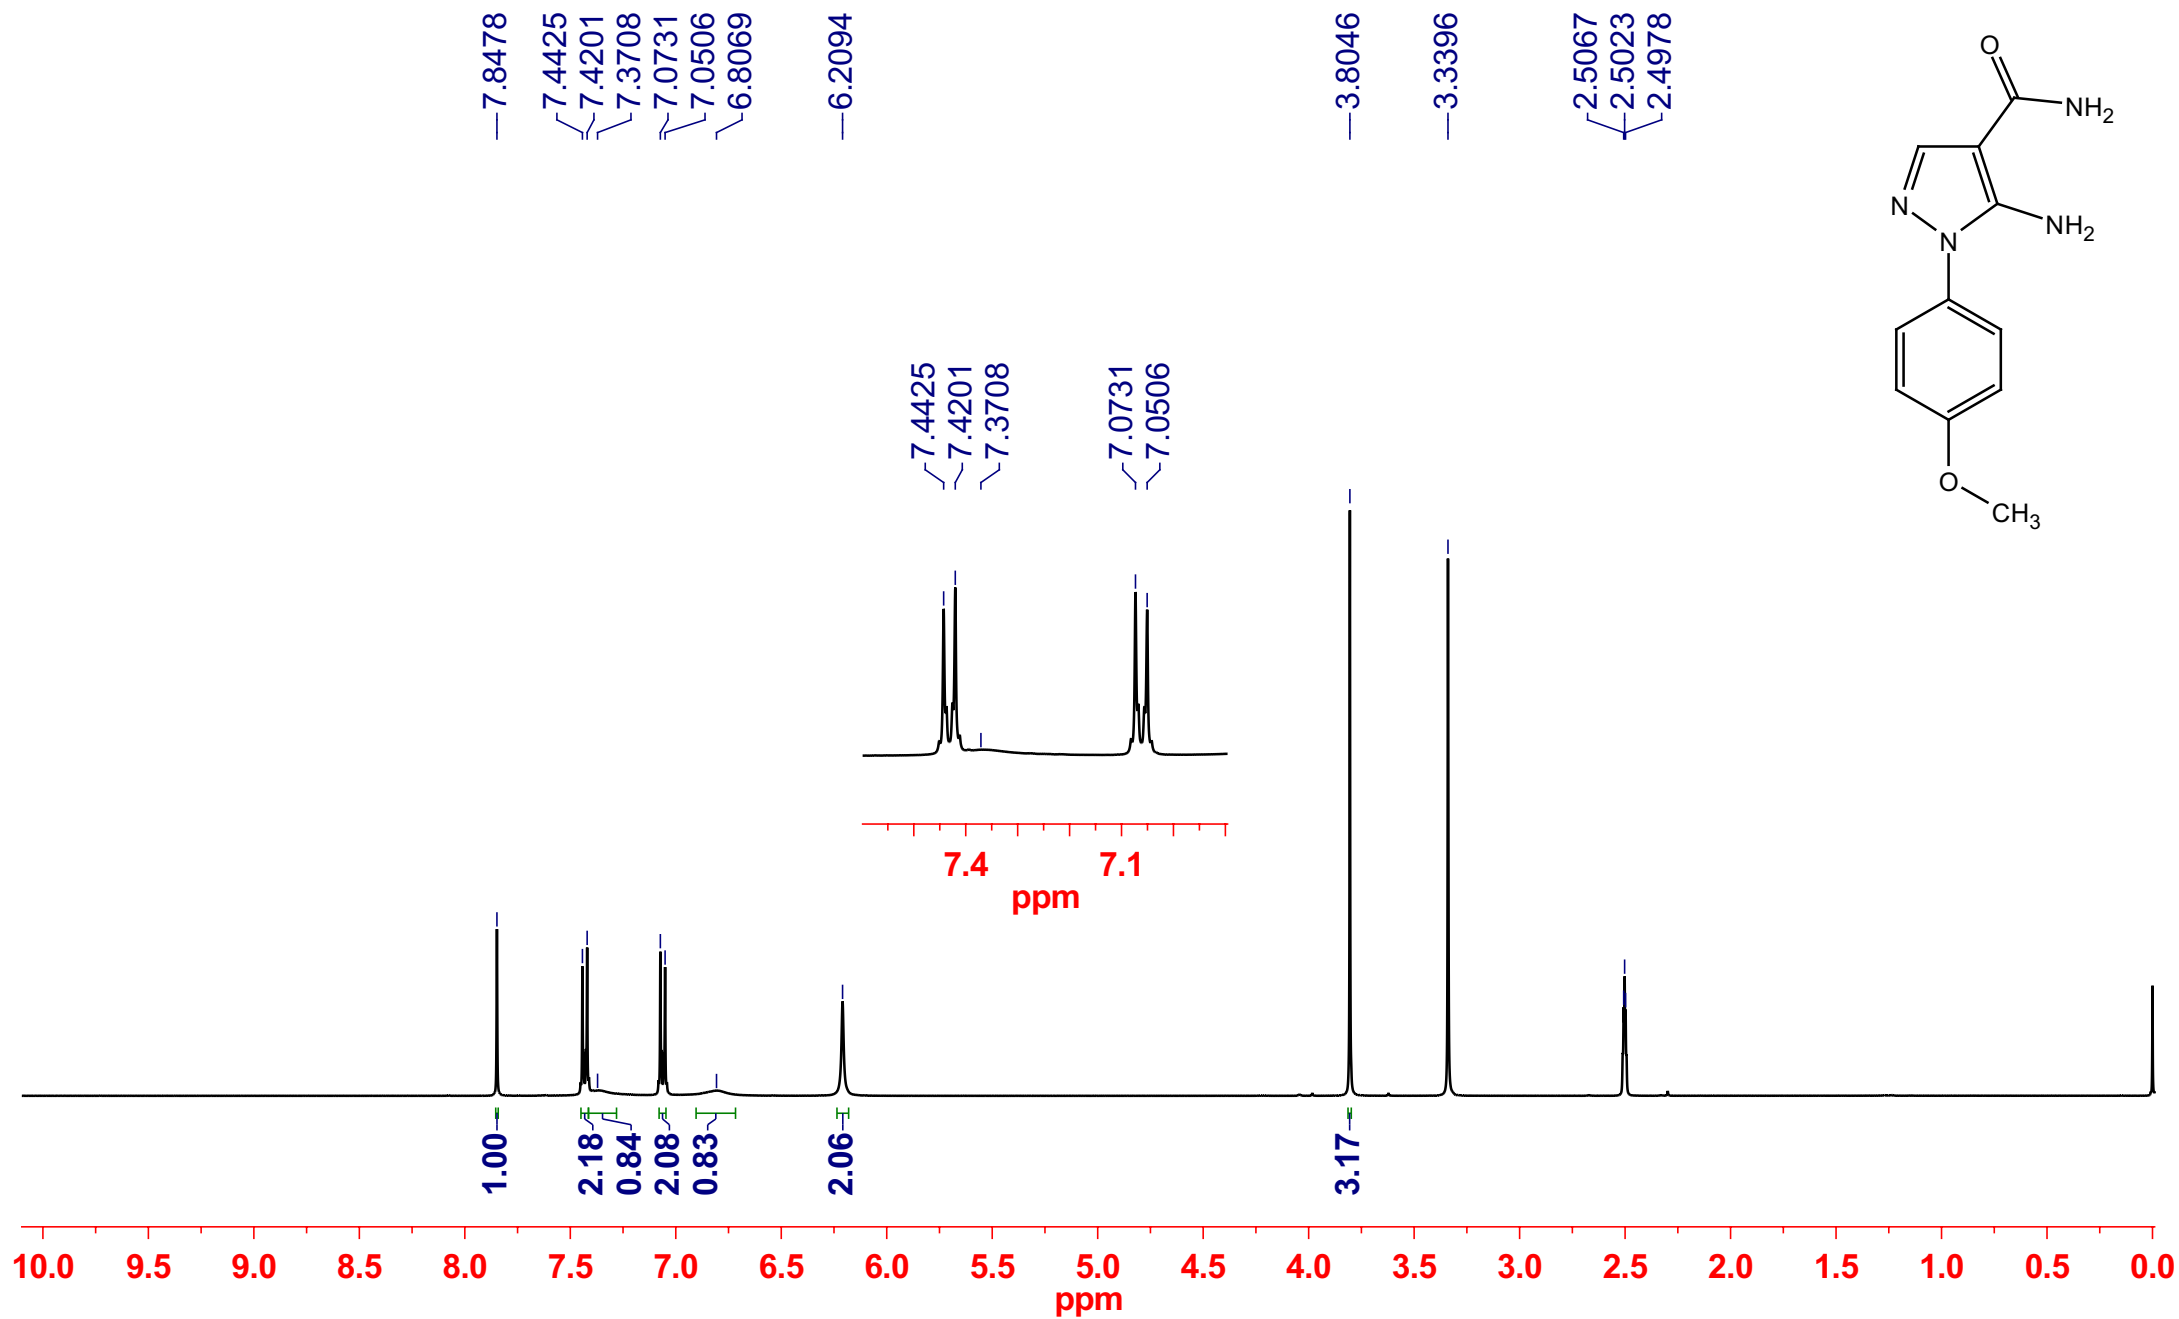

<sup>13</sup>C NMR of compound **2k**

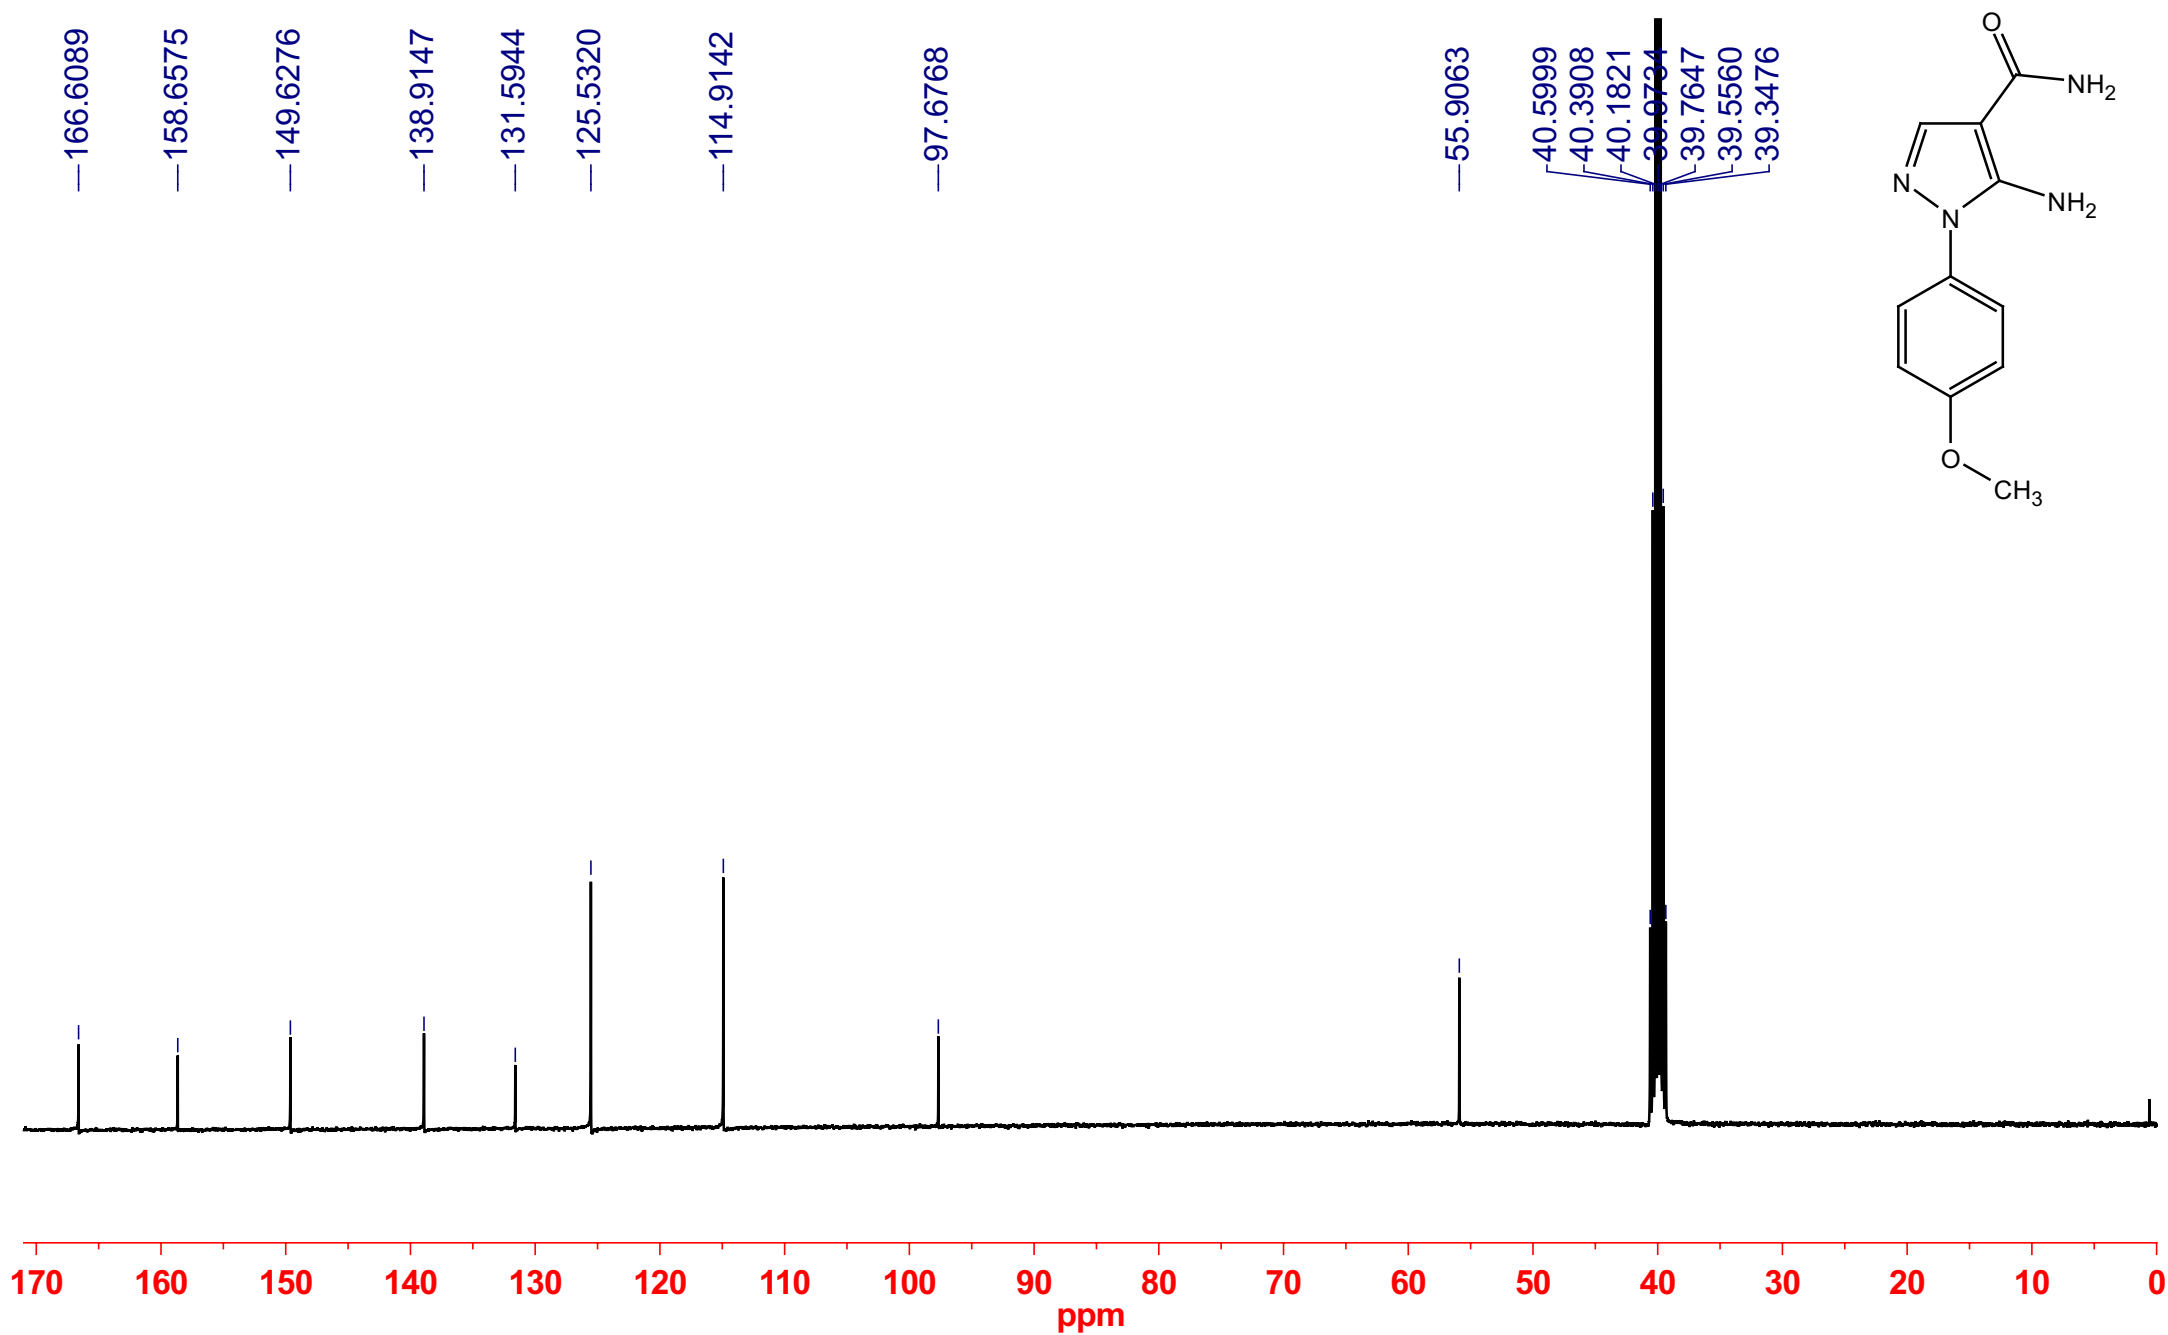

<sup>1</sup>H NMR of compound **2I**

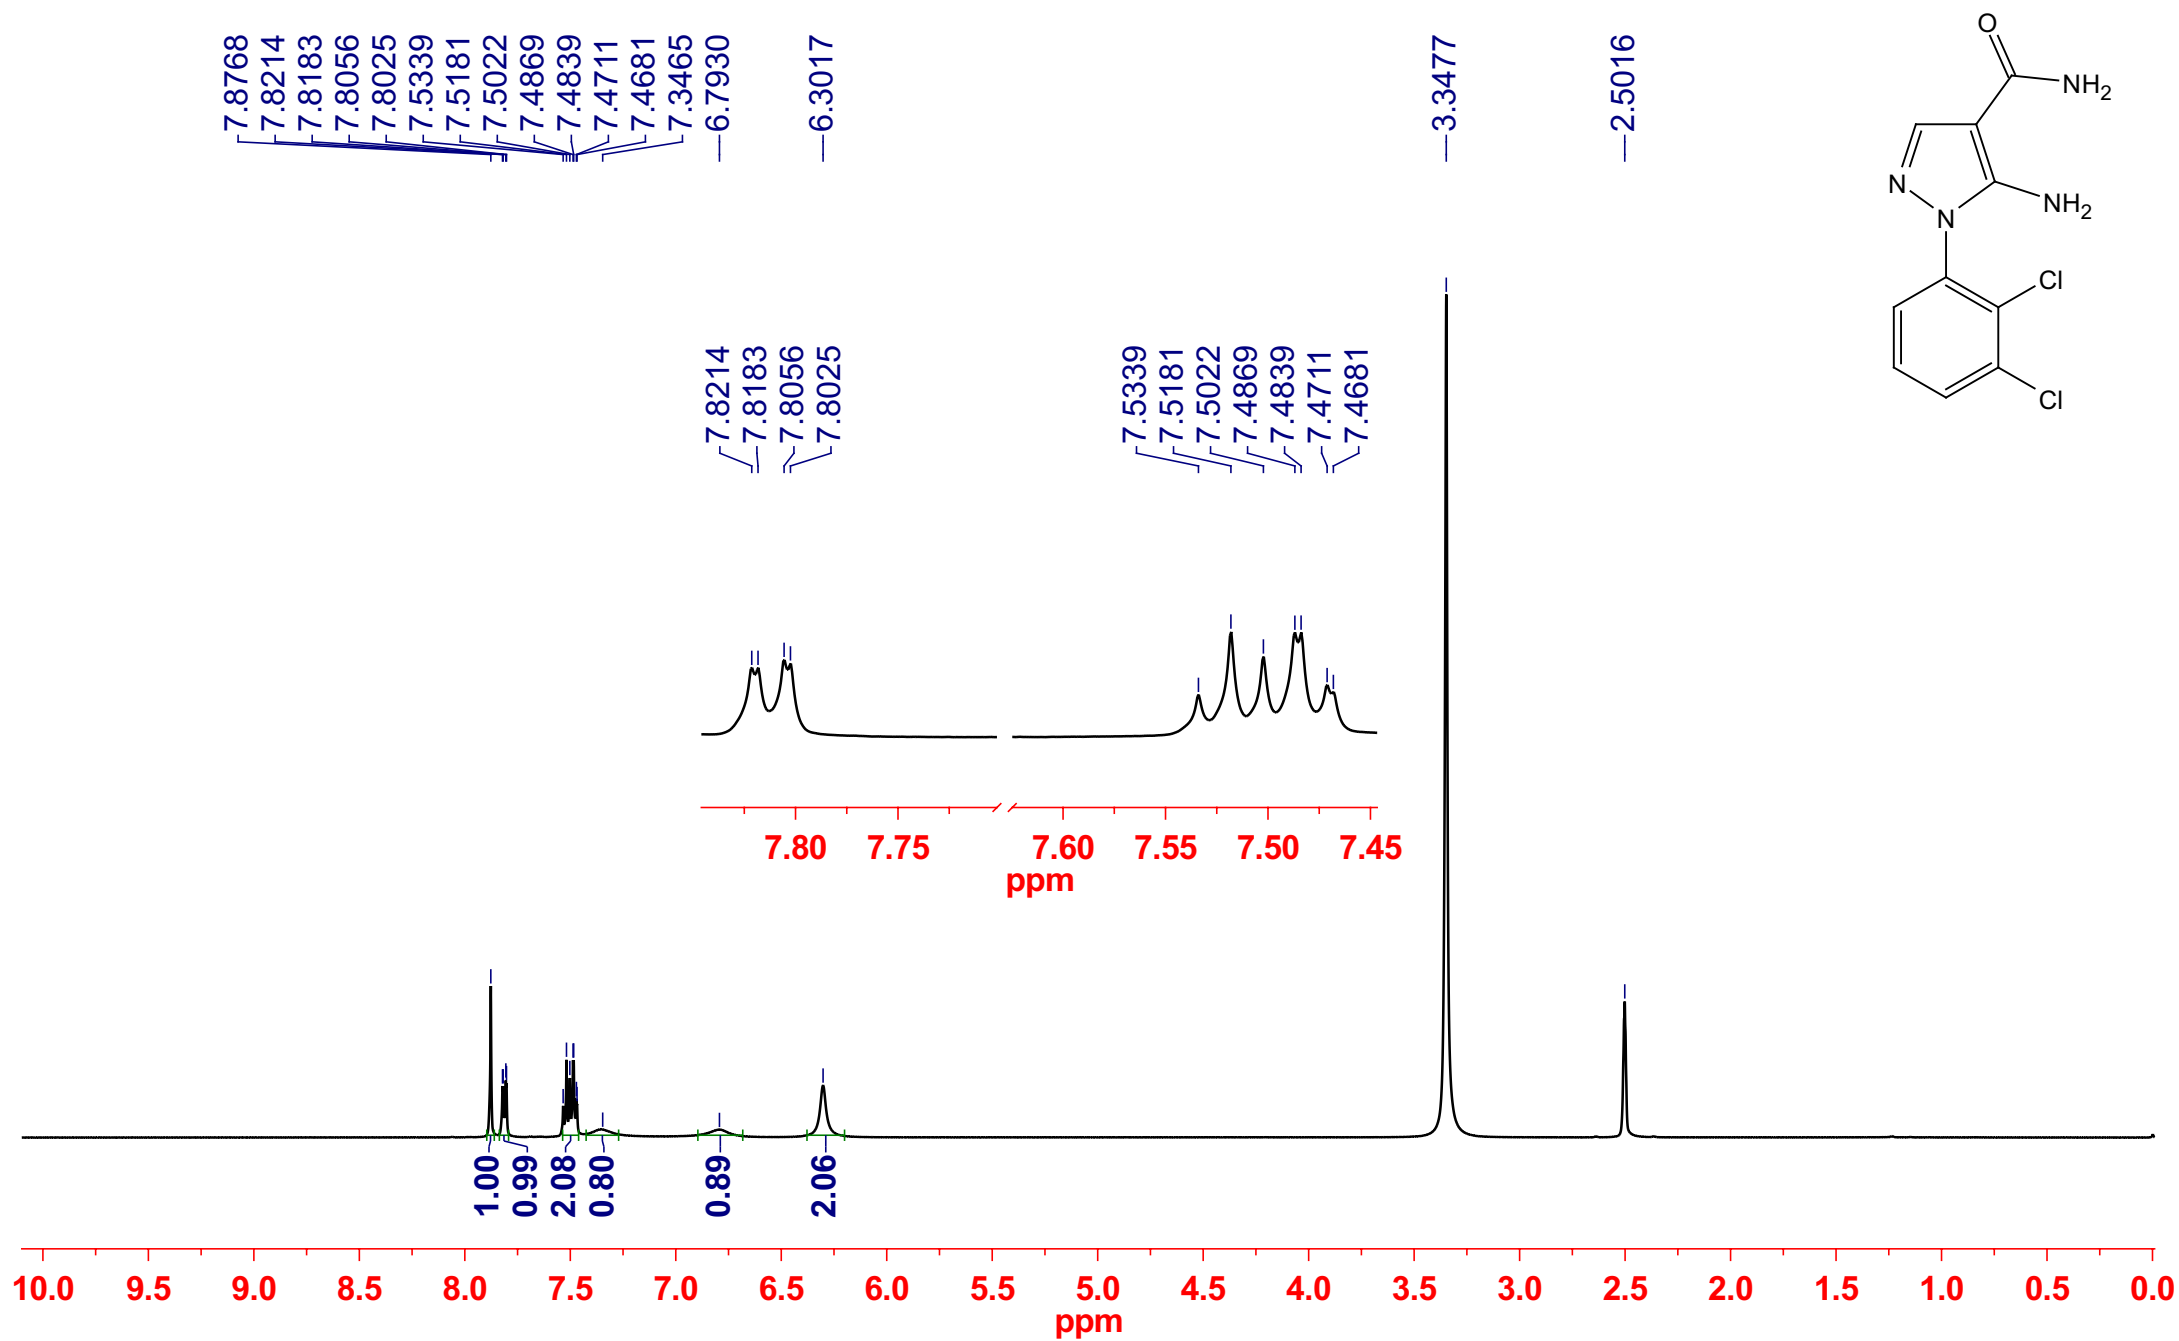

<sup>13</sup>C NMR of compound **2l**

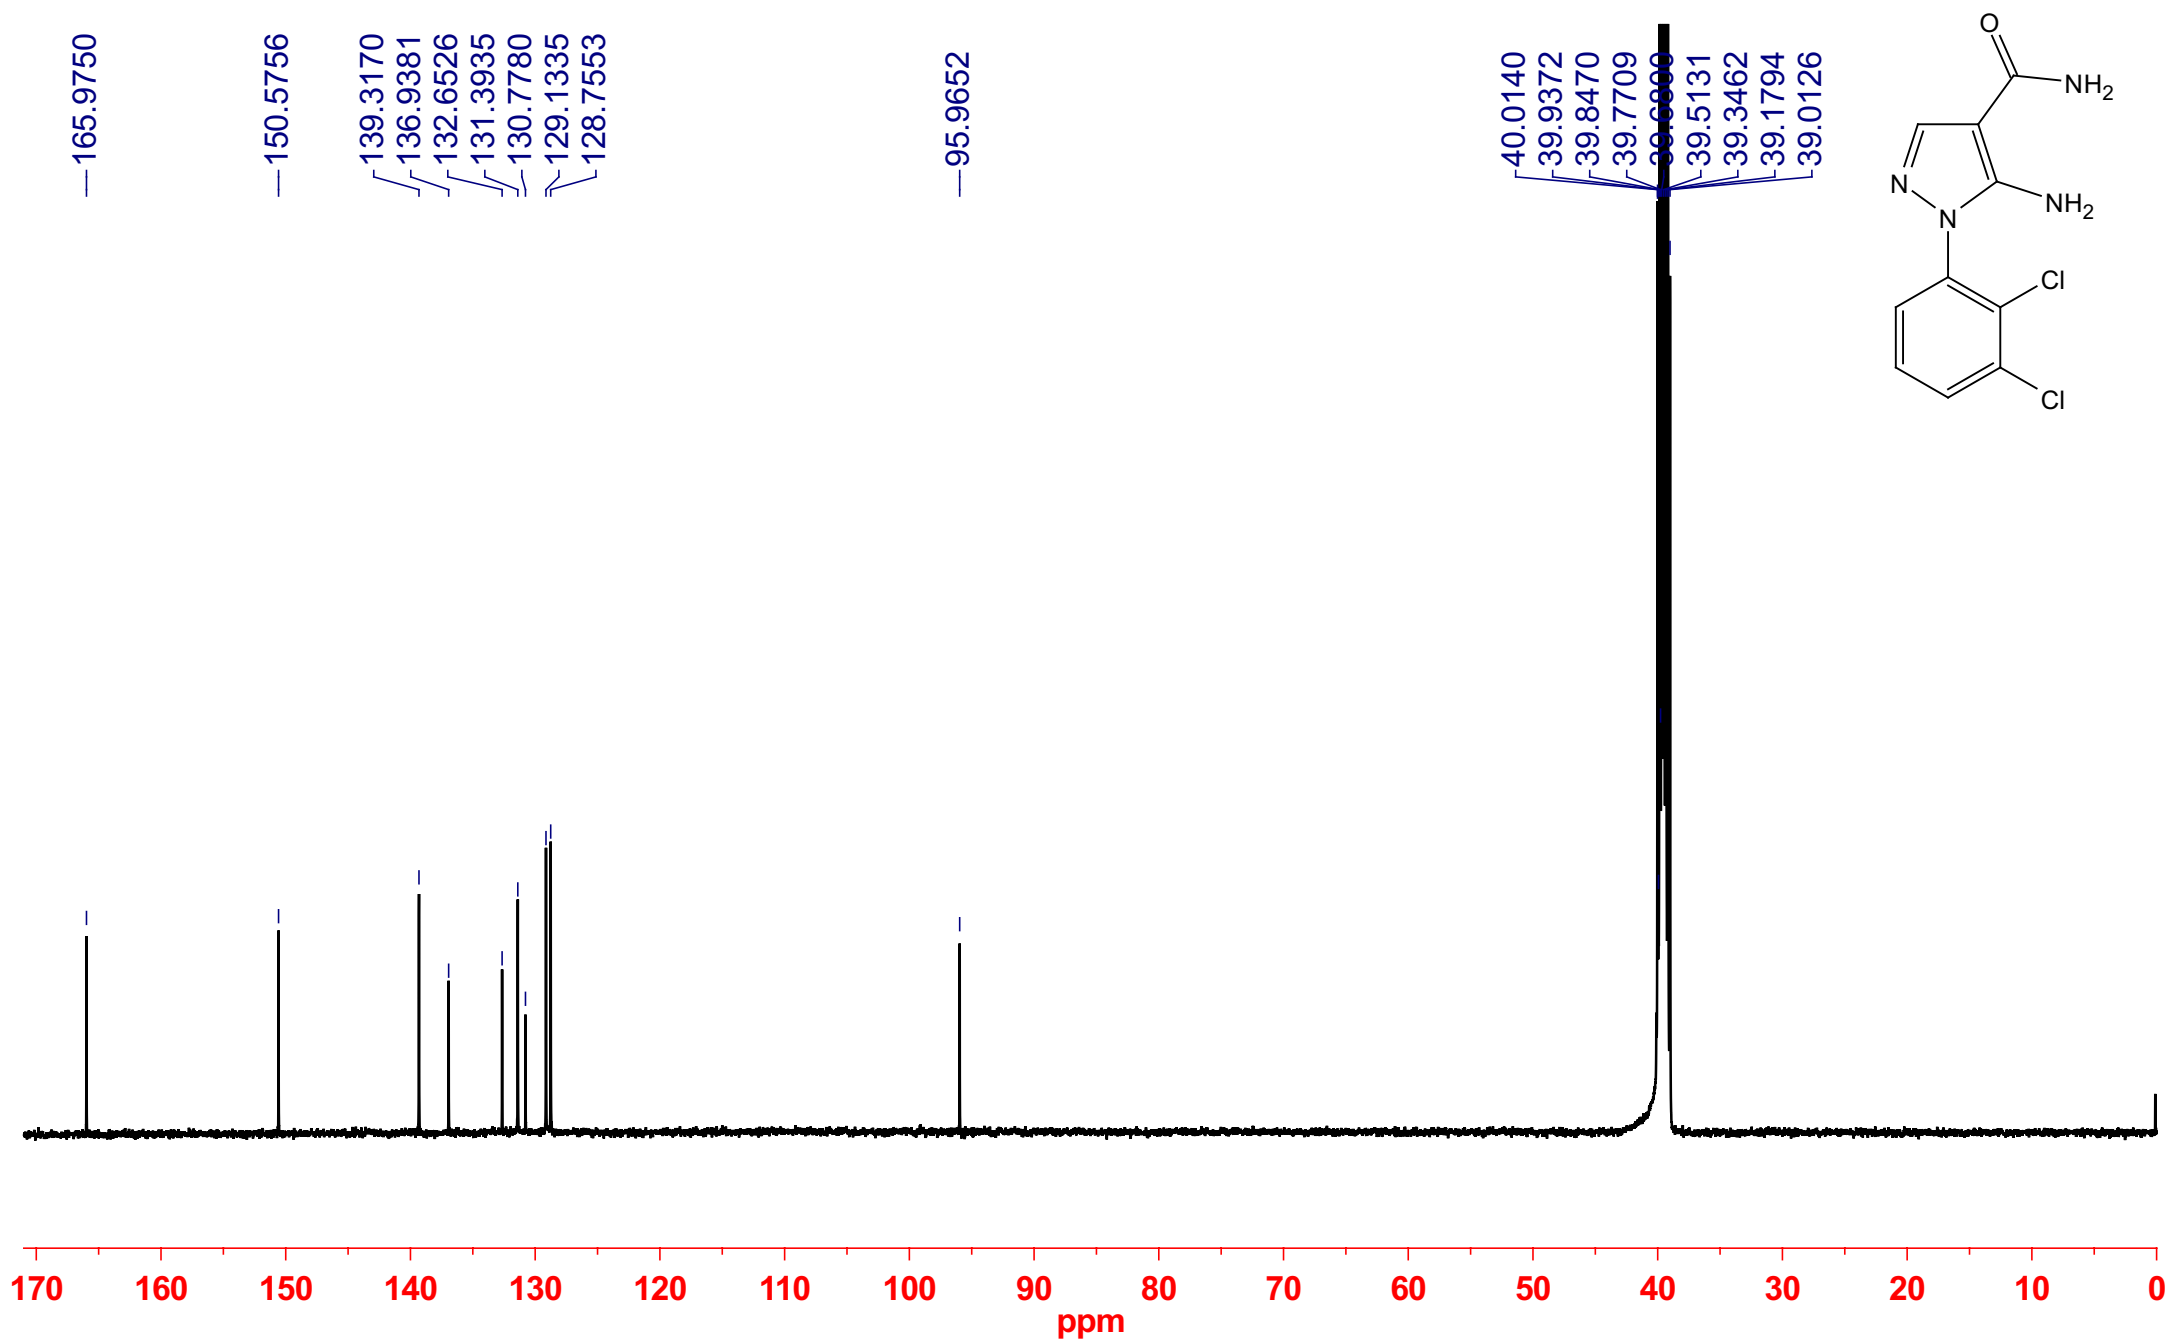

<sup>1</sup>H NMR of compound **3a**

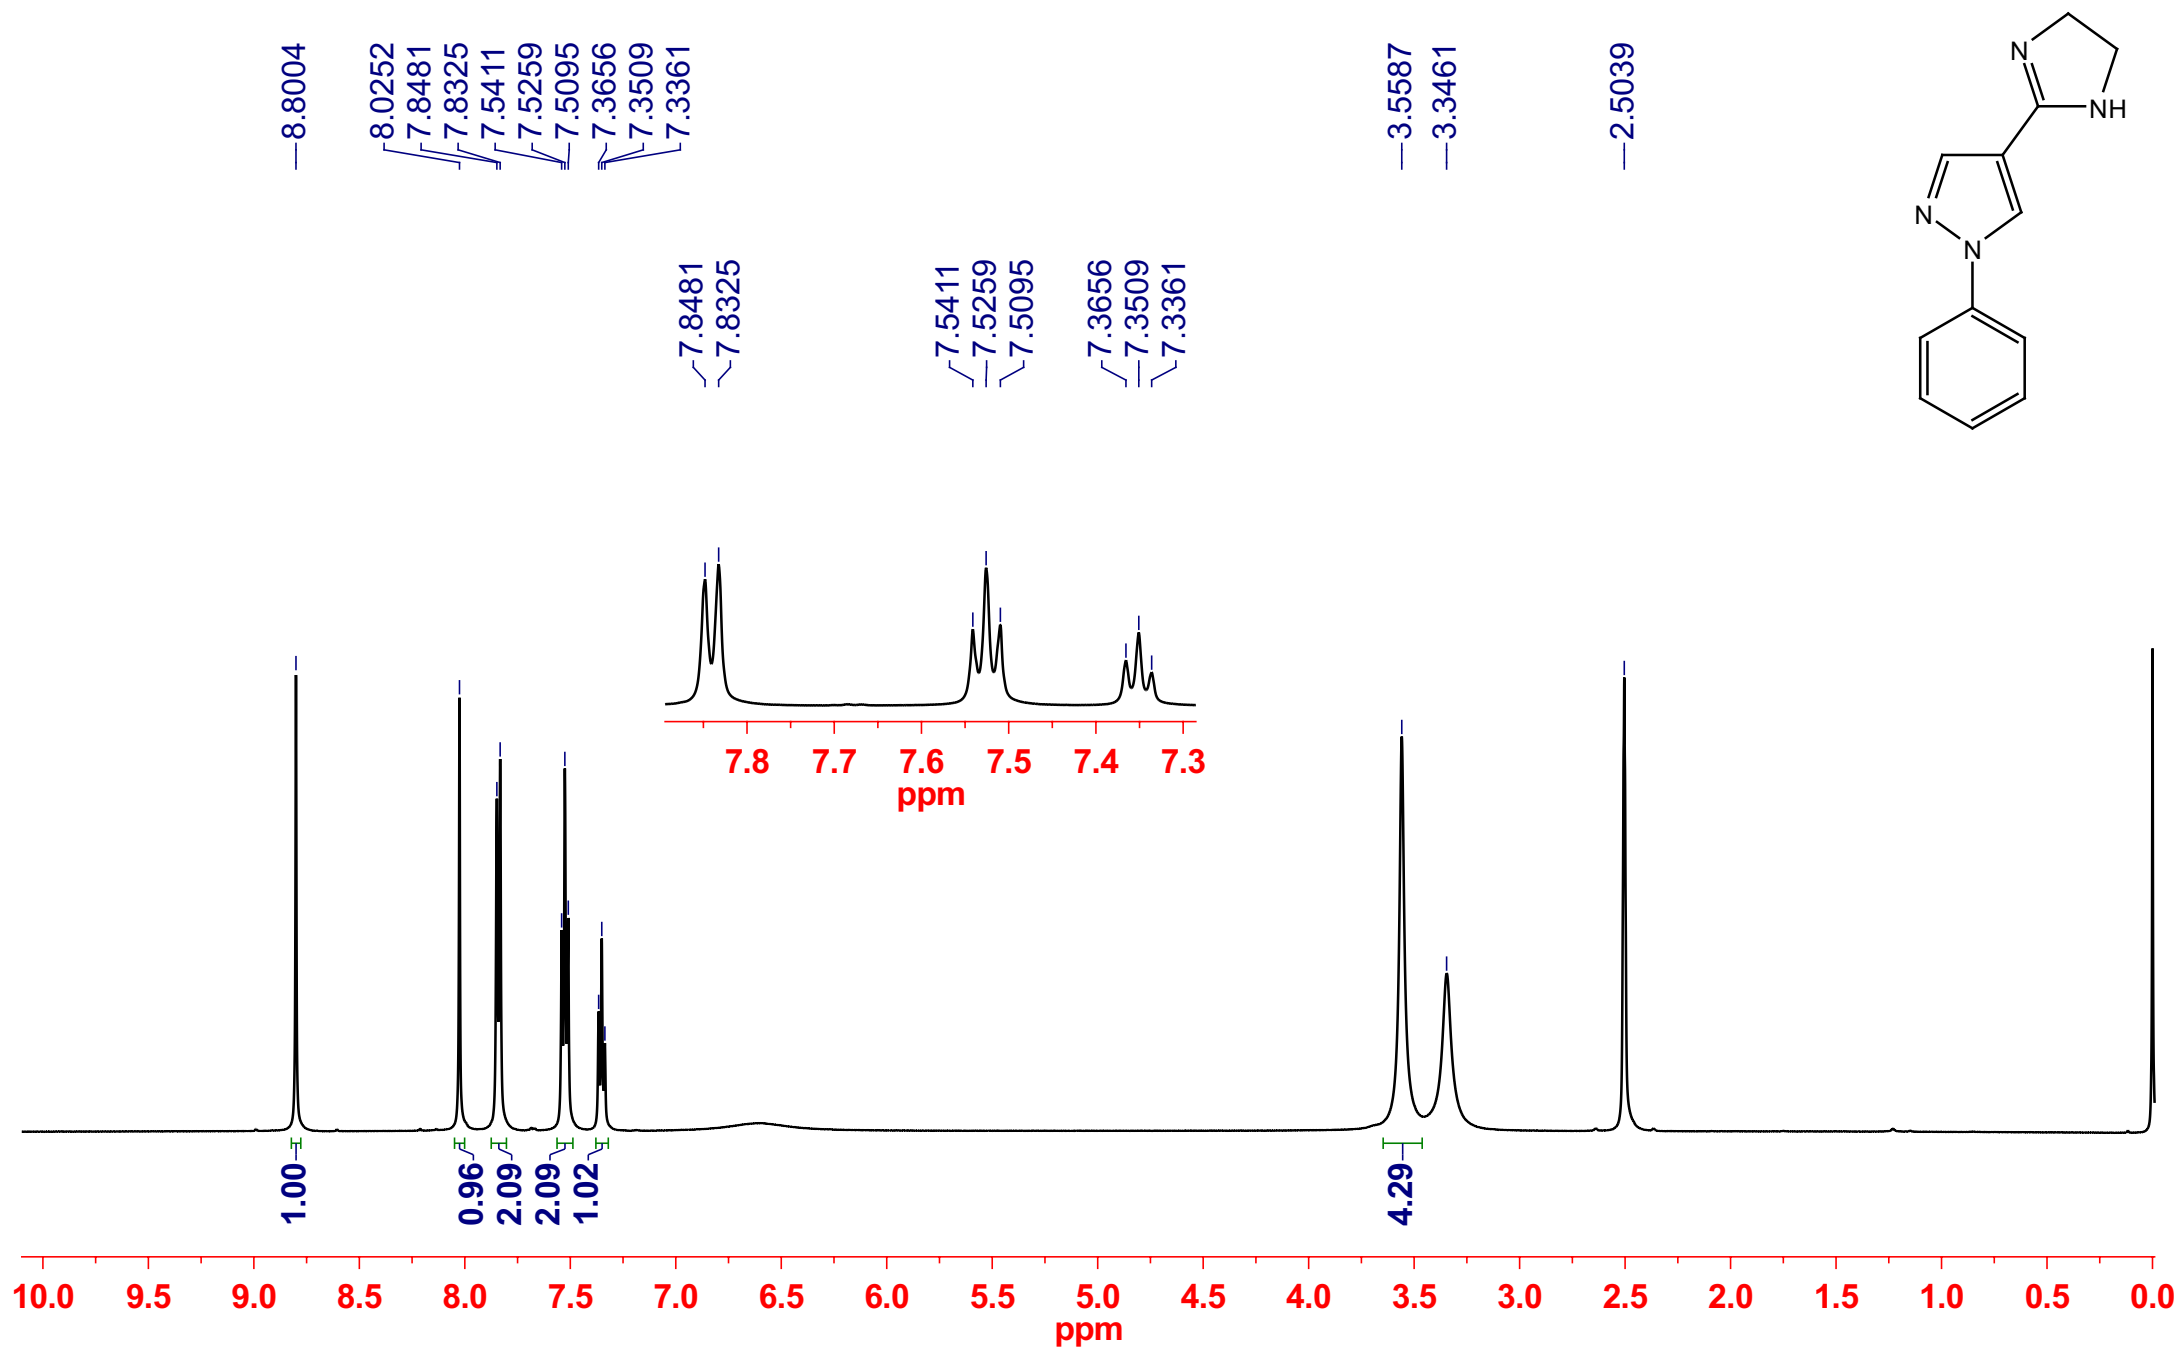

<sup>13</sup>C NMR of compound **3a**

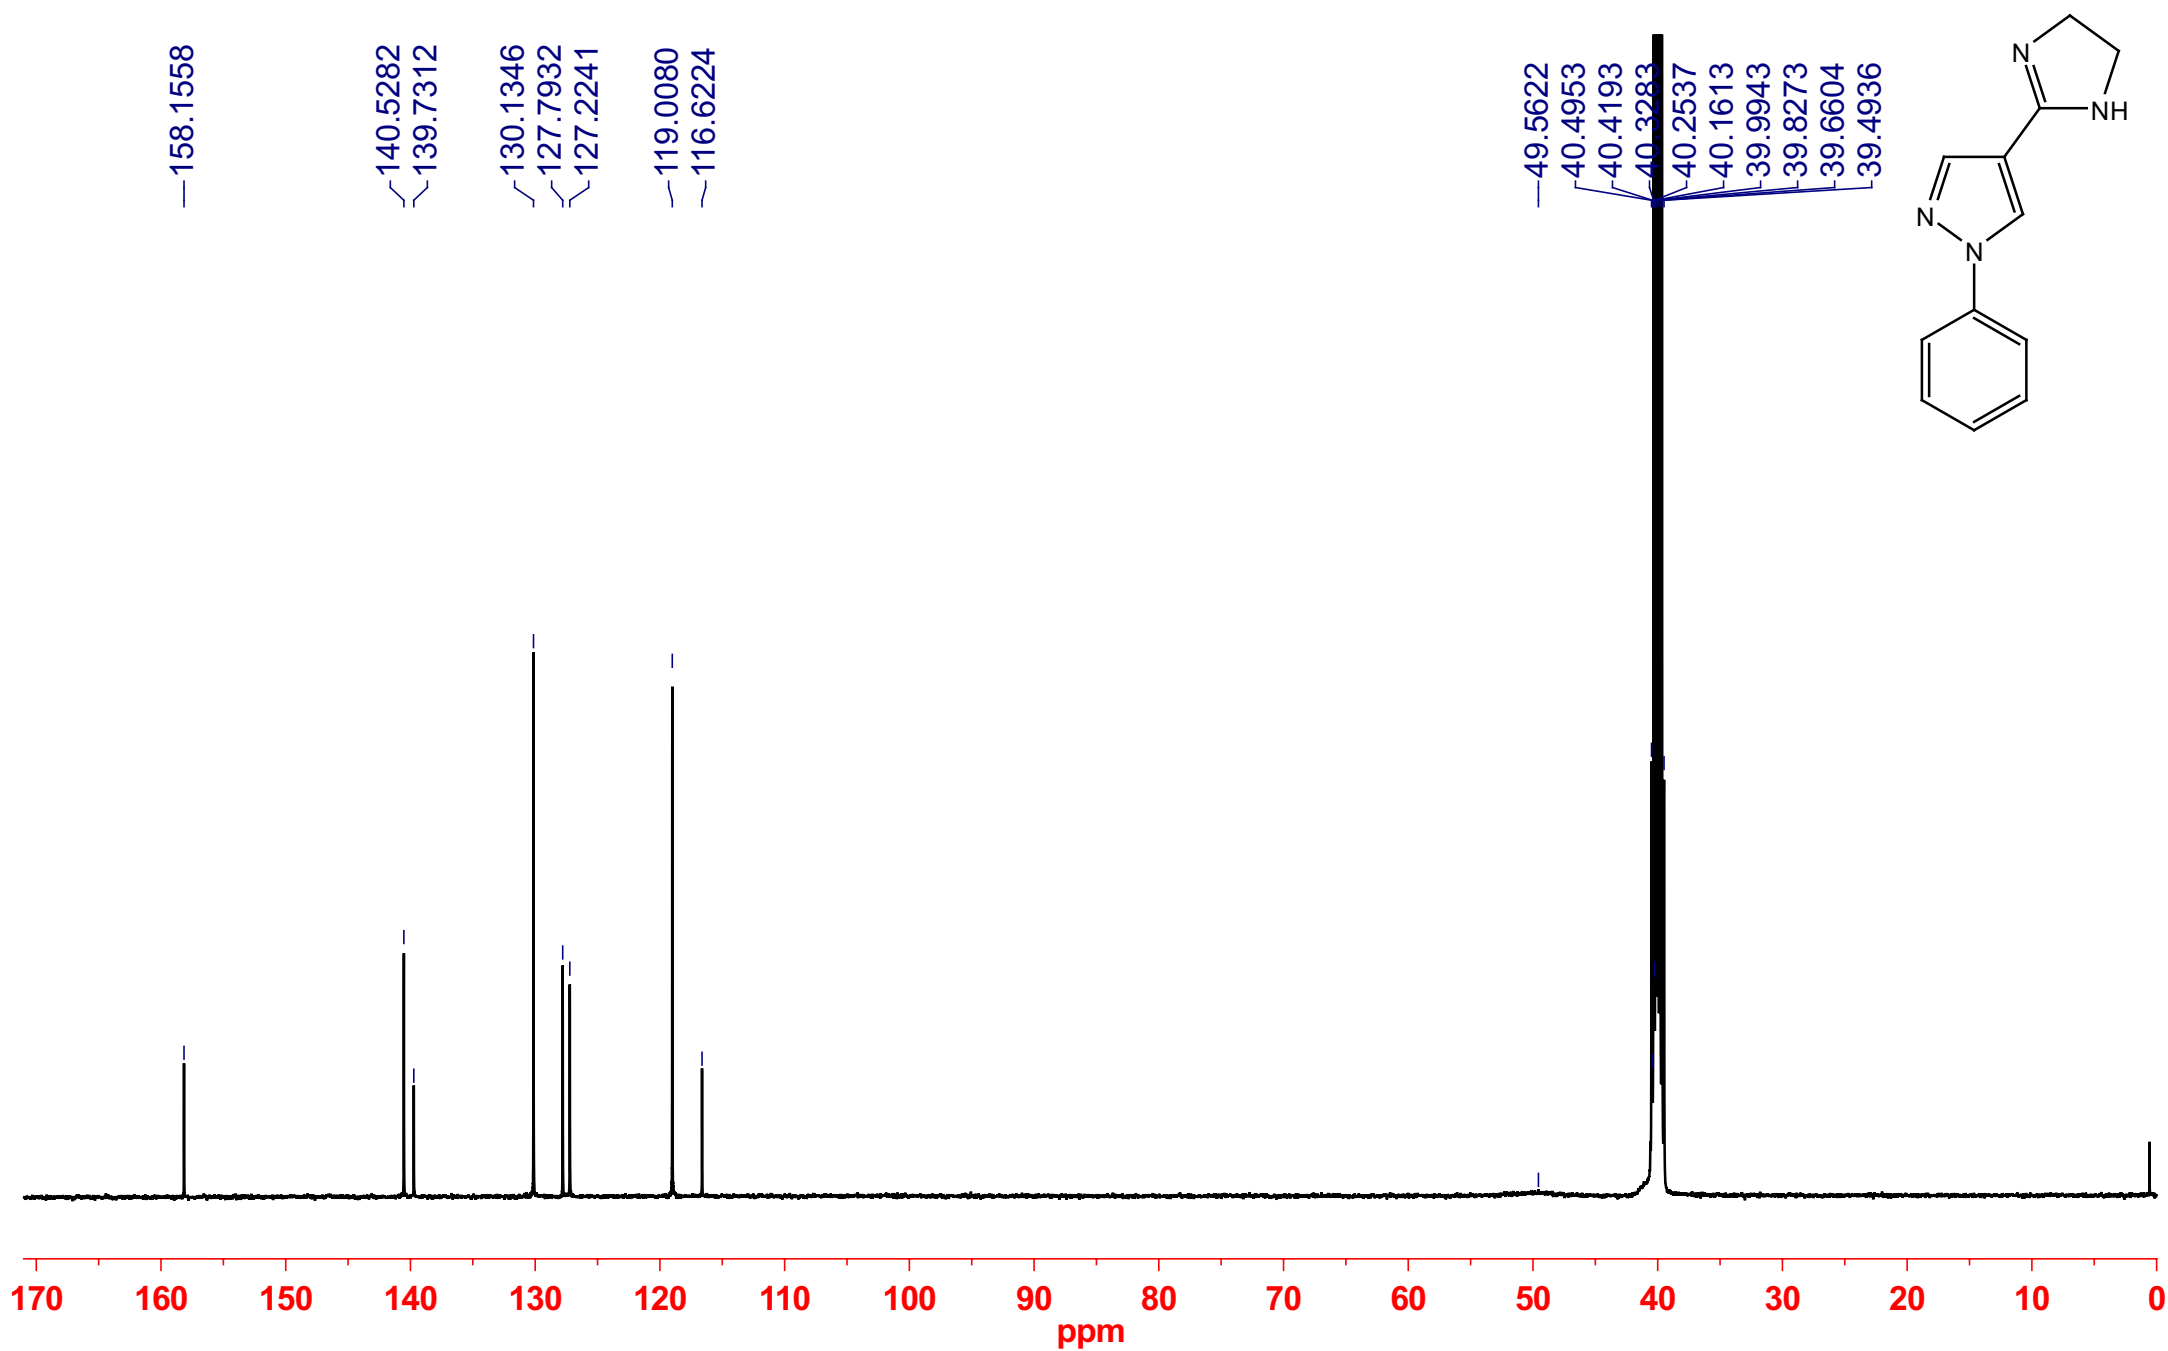

<sup>1</sup>H NMR of compound **3b**

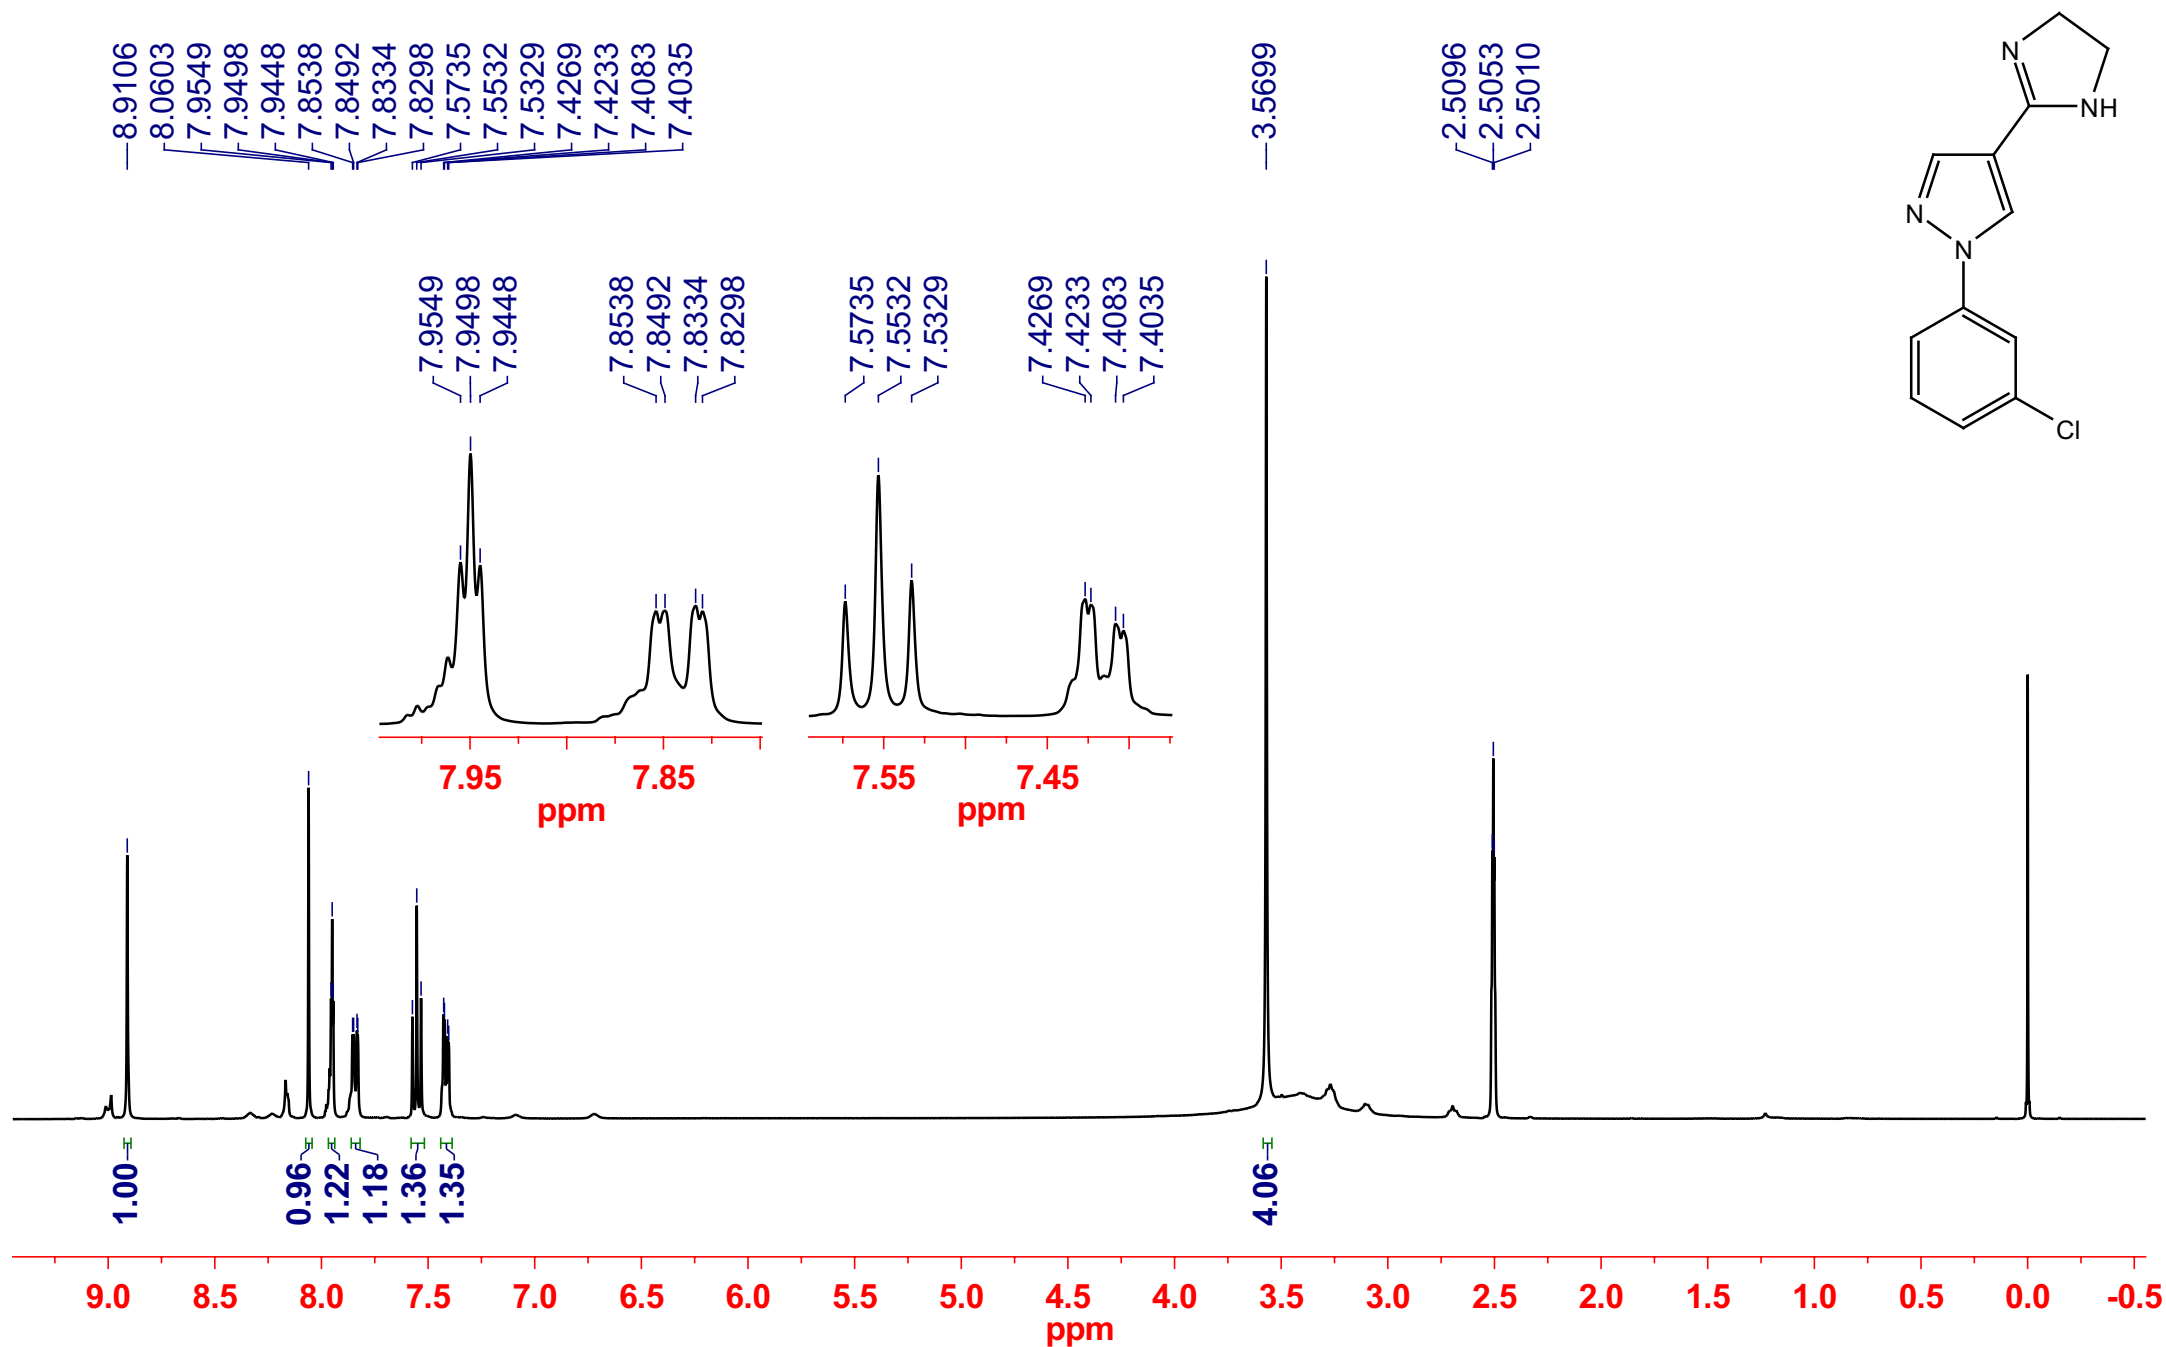

<sup>13</sup>C NMR of compound **3b**

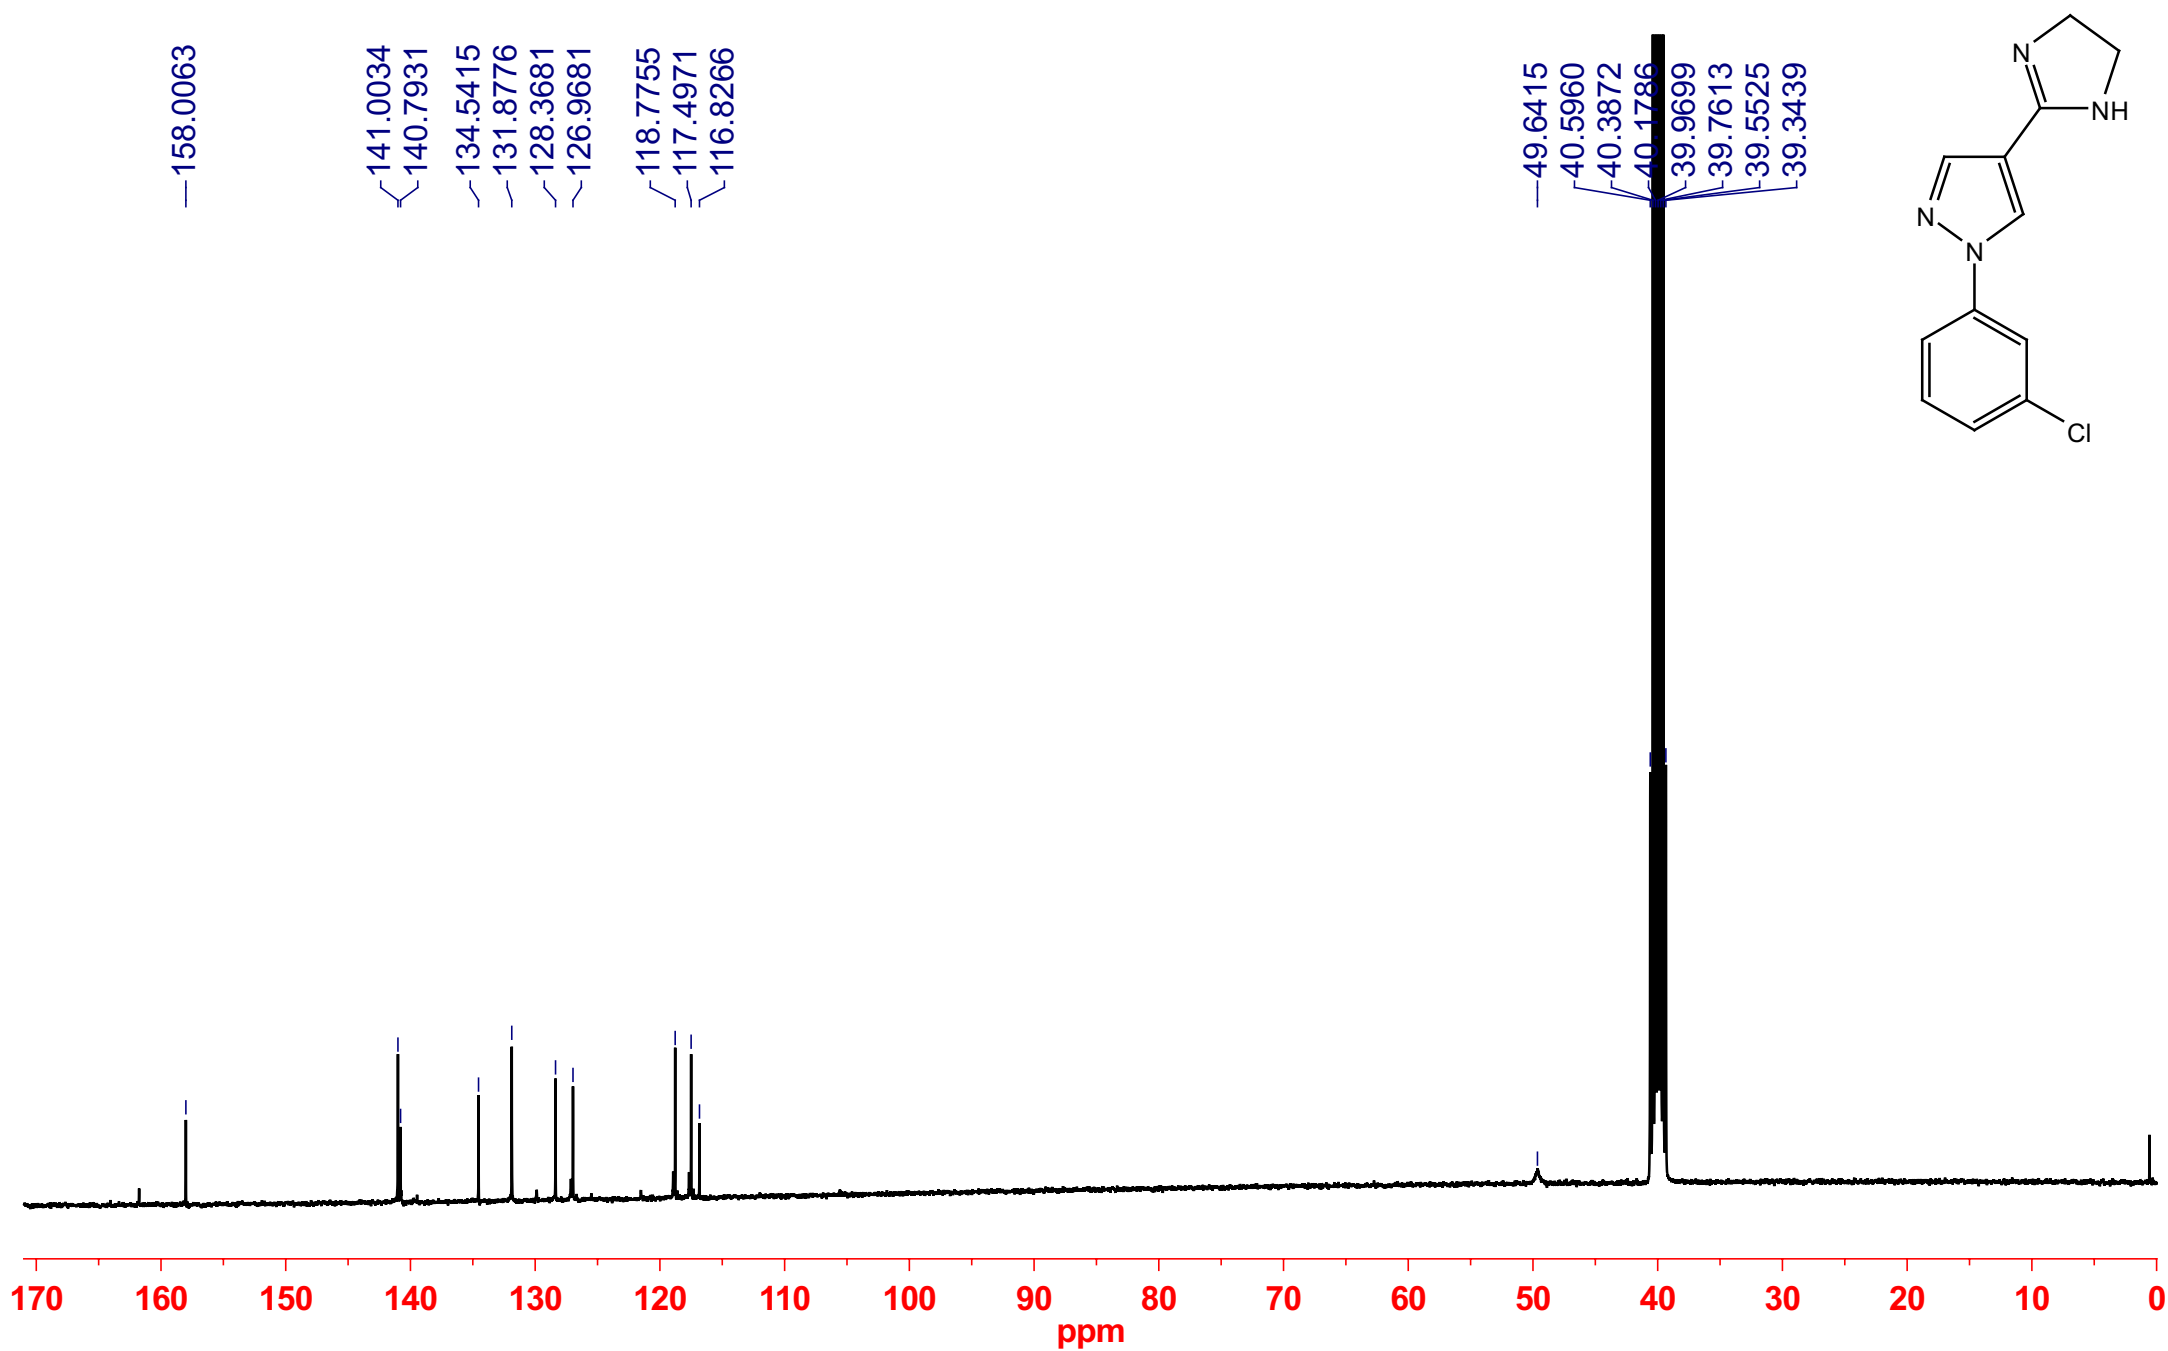



<sup>1</sup>H NMR of compound **3c**

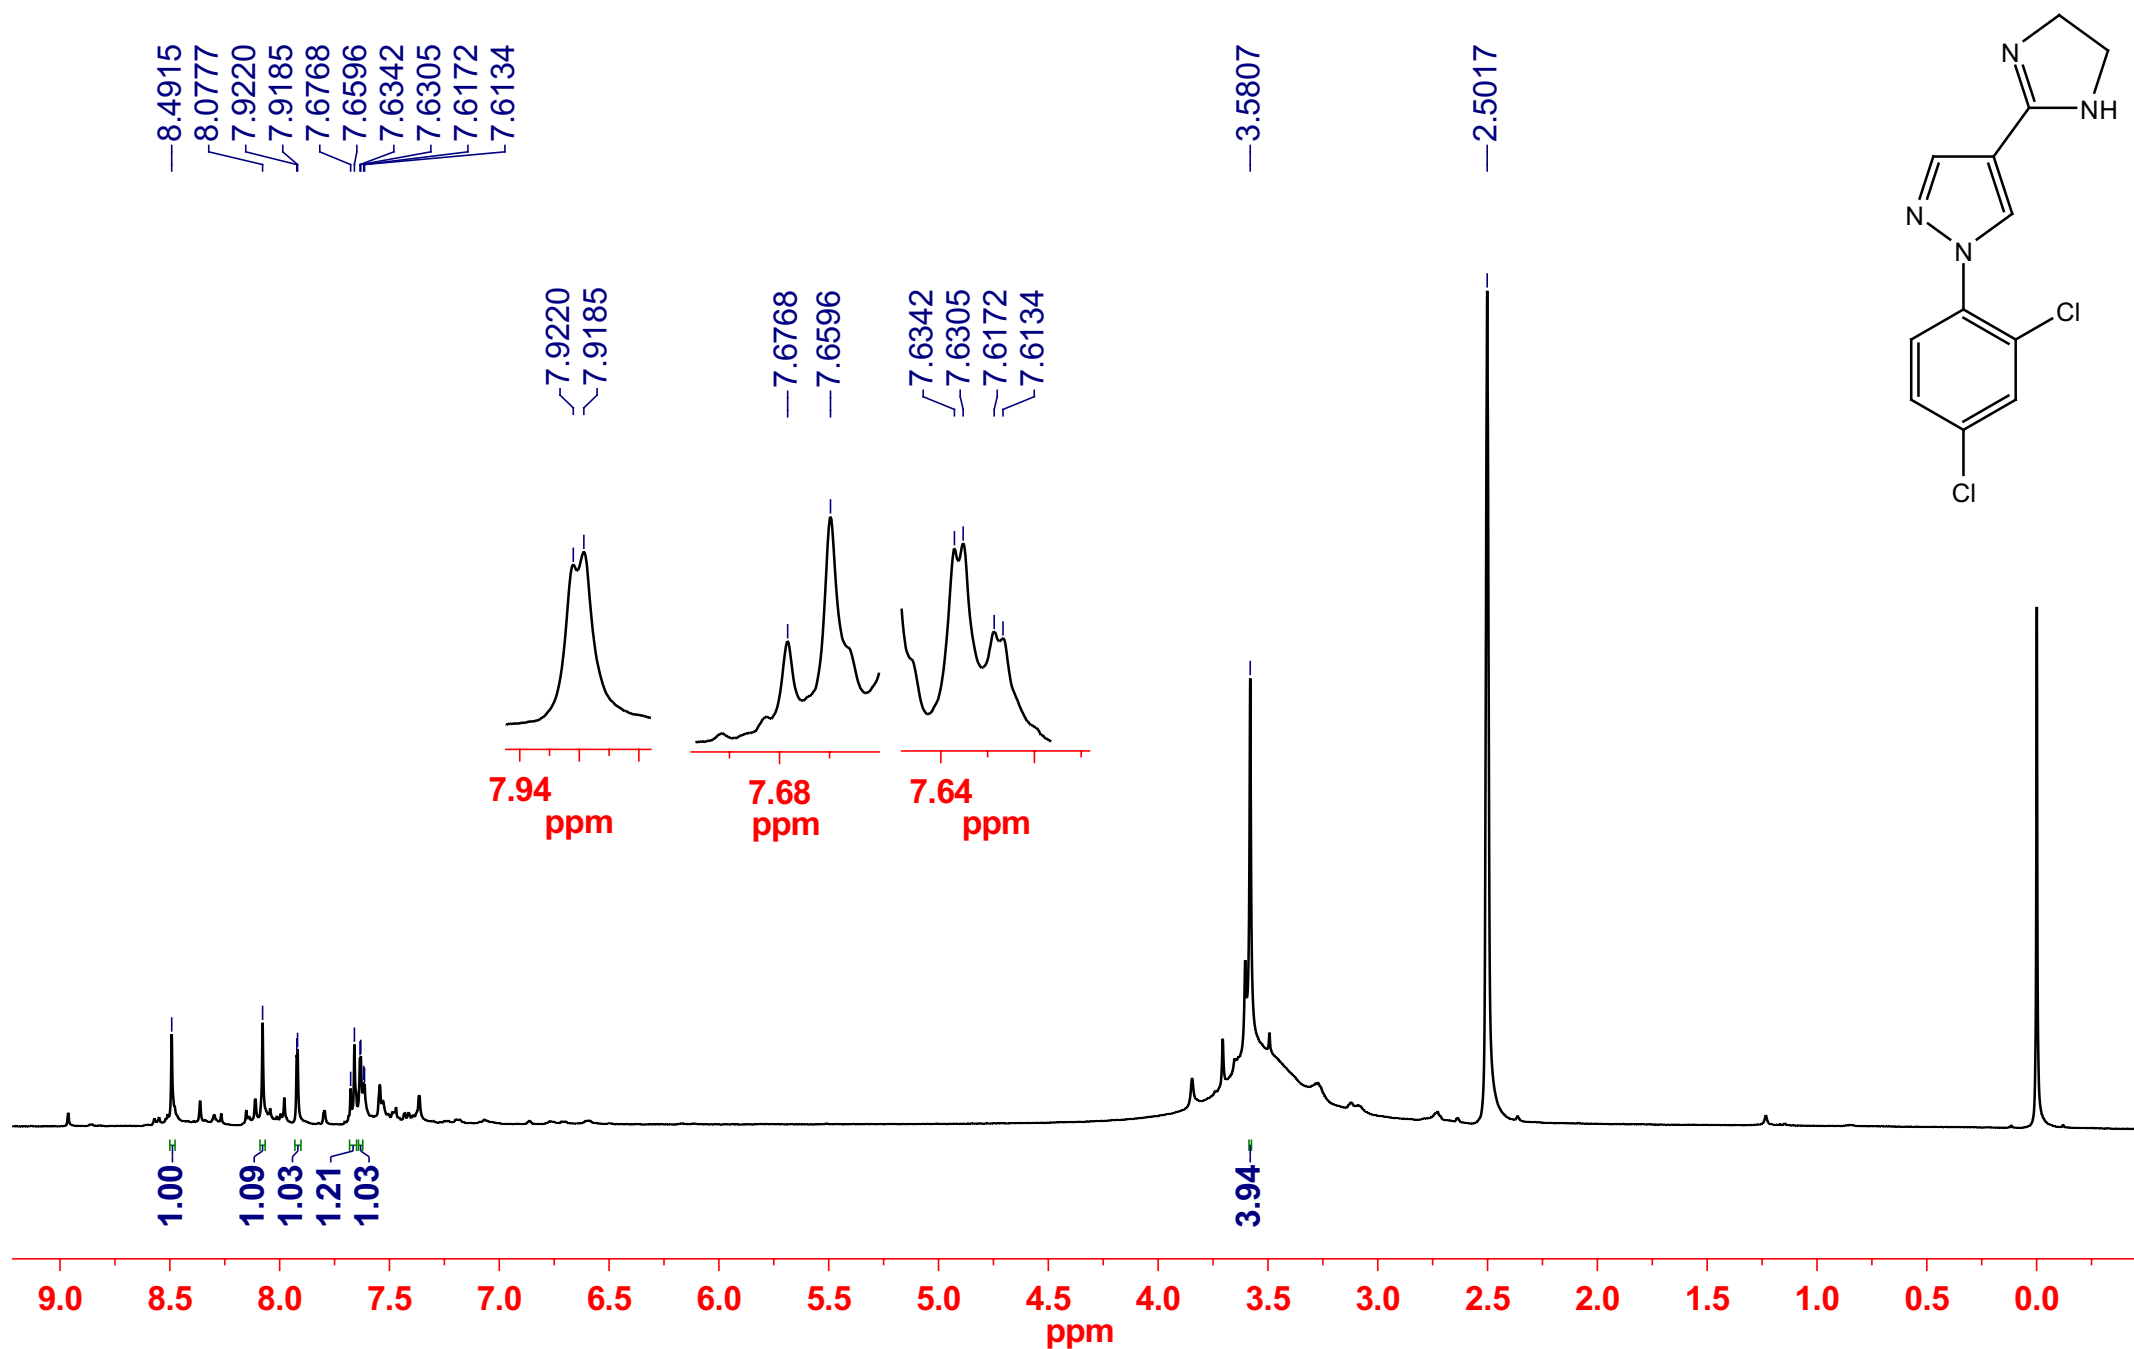

<sup>13</sup>C NMR of compound **3c**

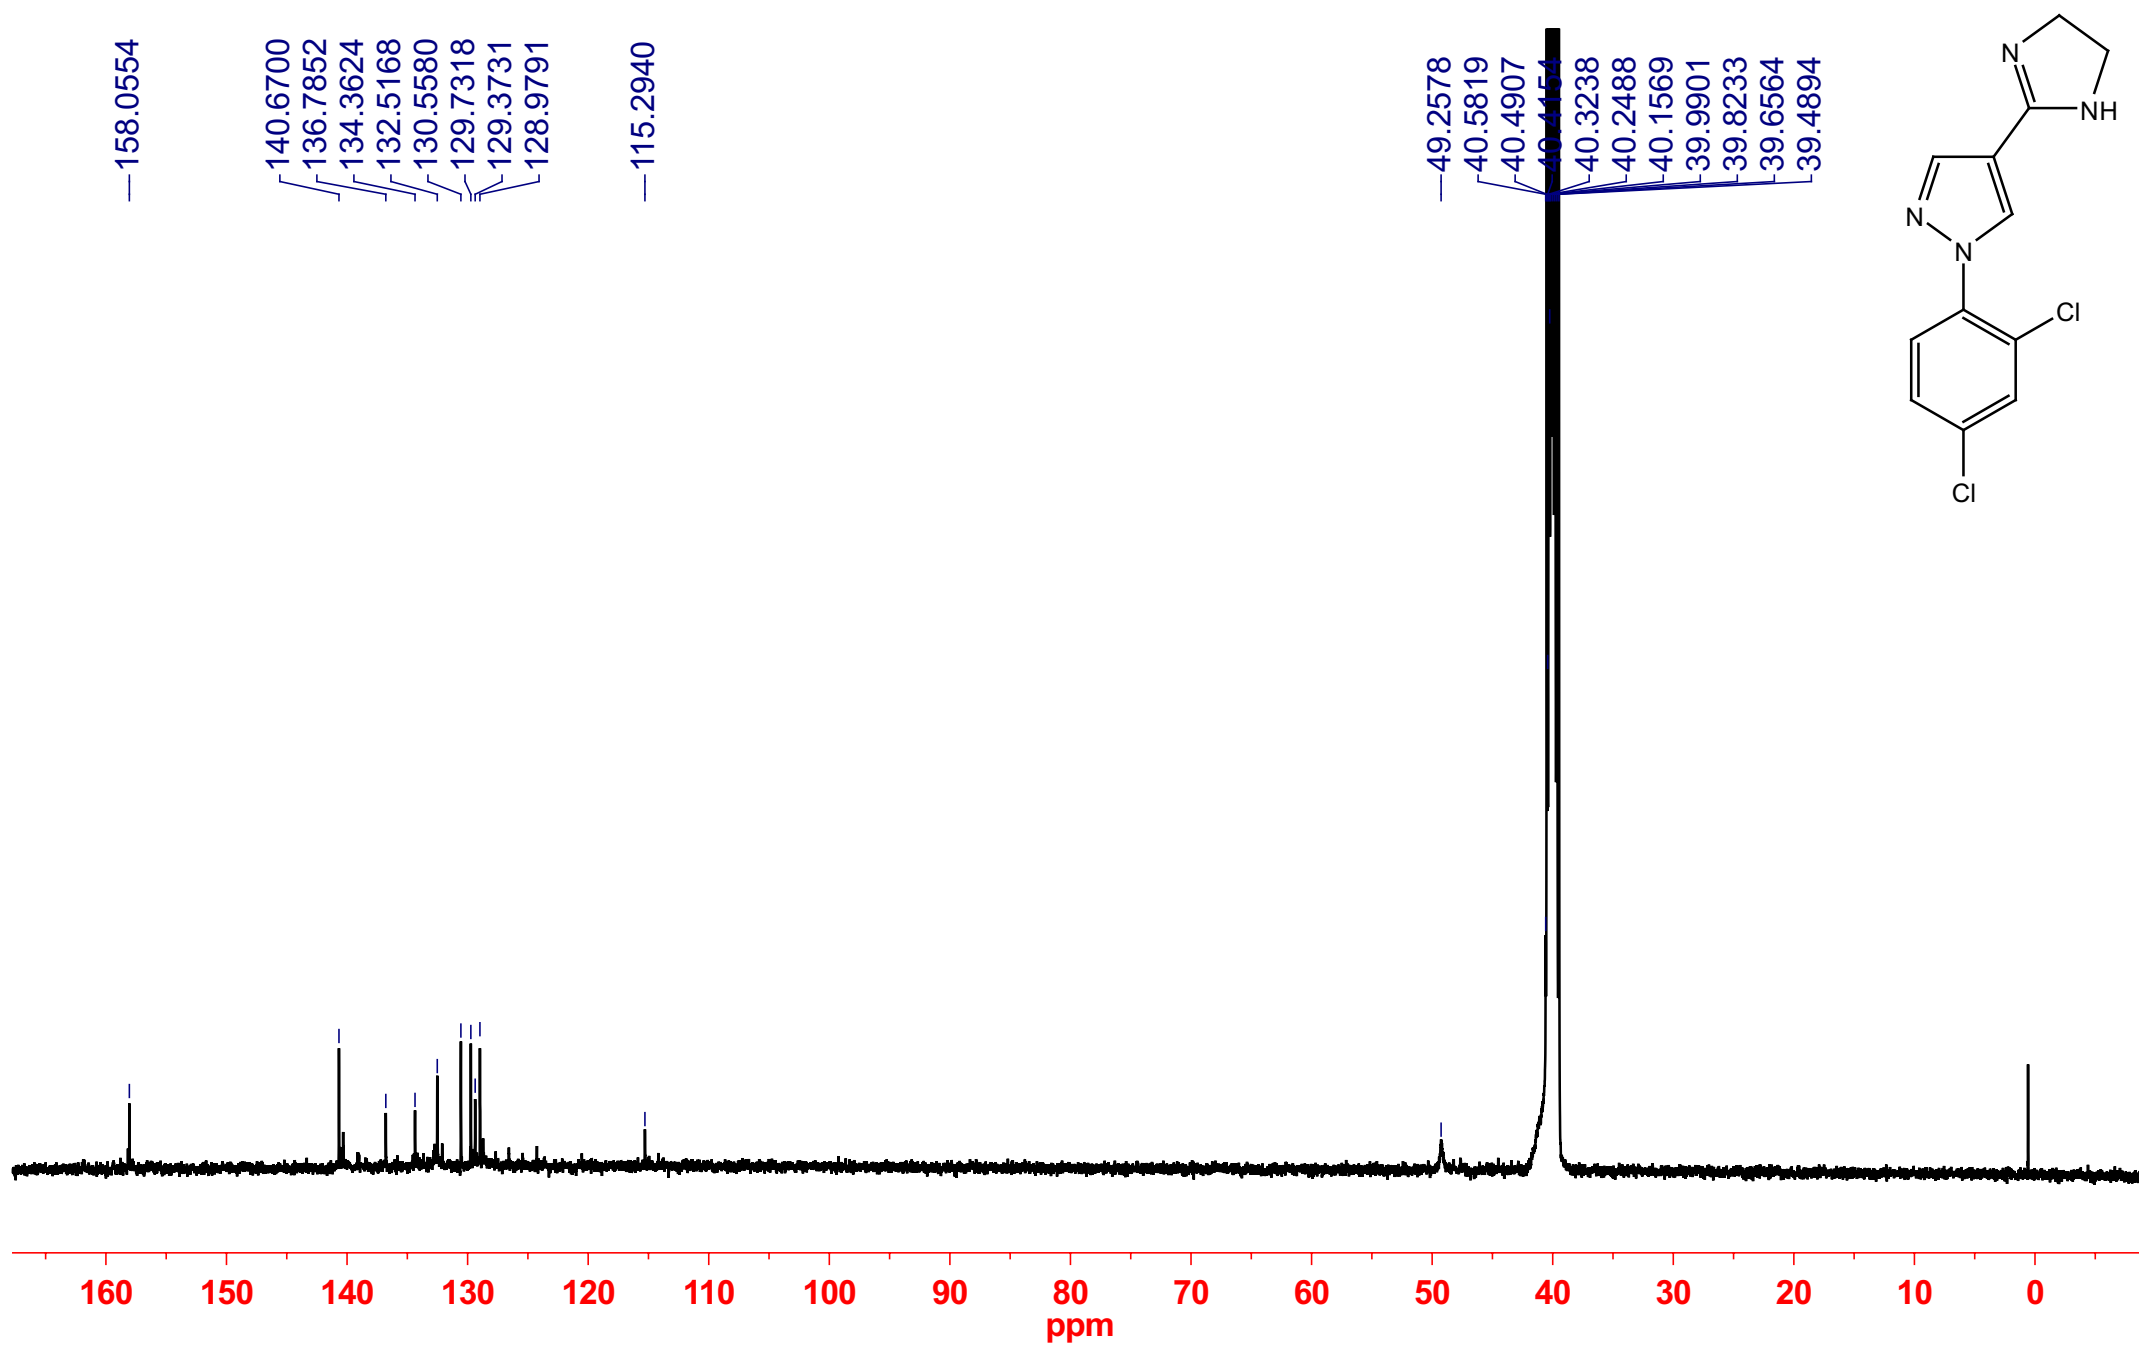

<sup>1</sup>H NMR of compound **3d**

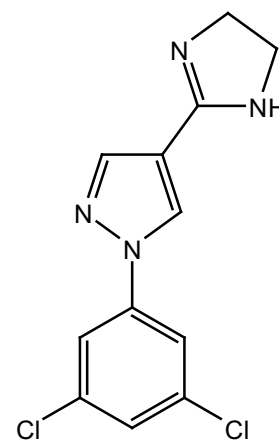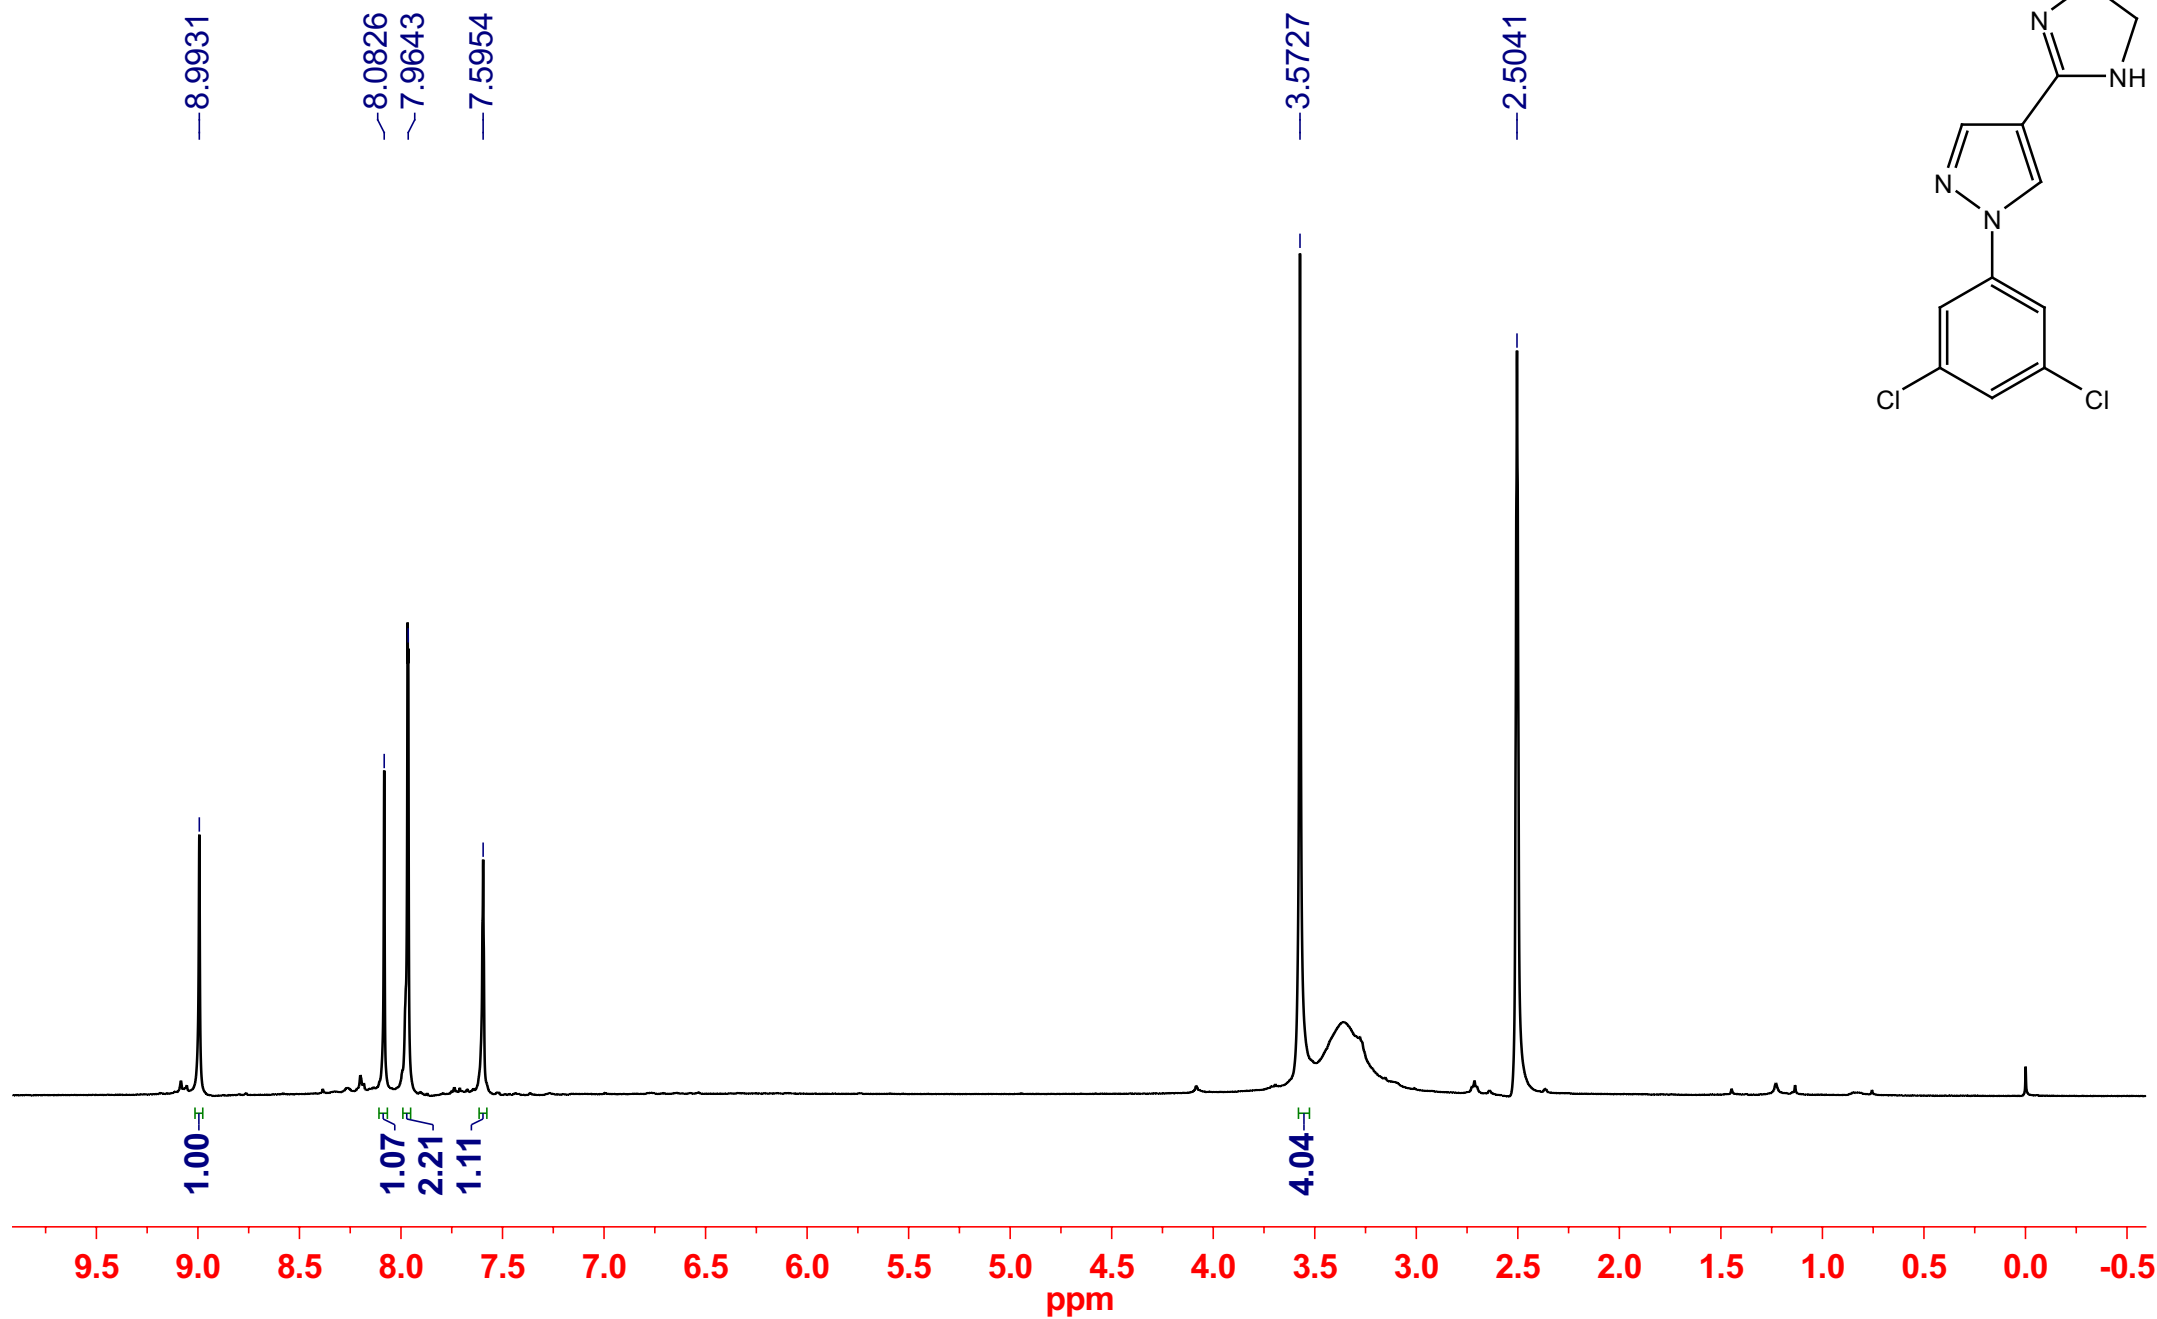

<sup>13</sup>C NMR of compound **3d**

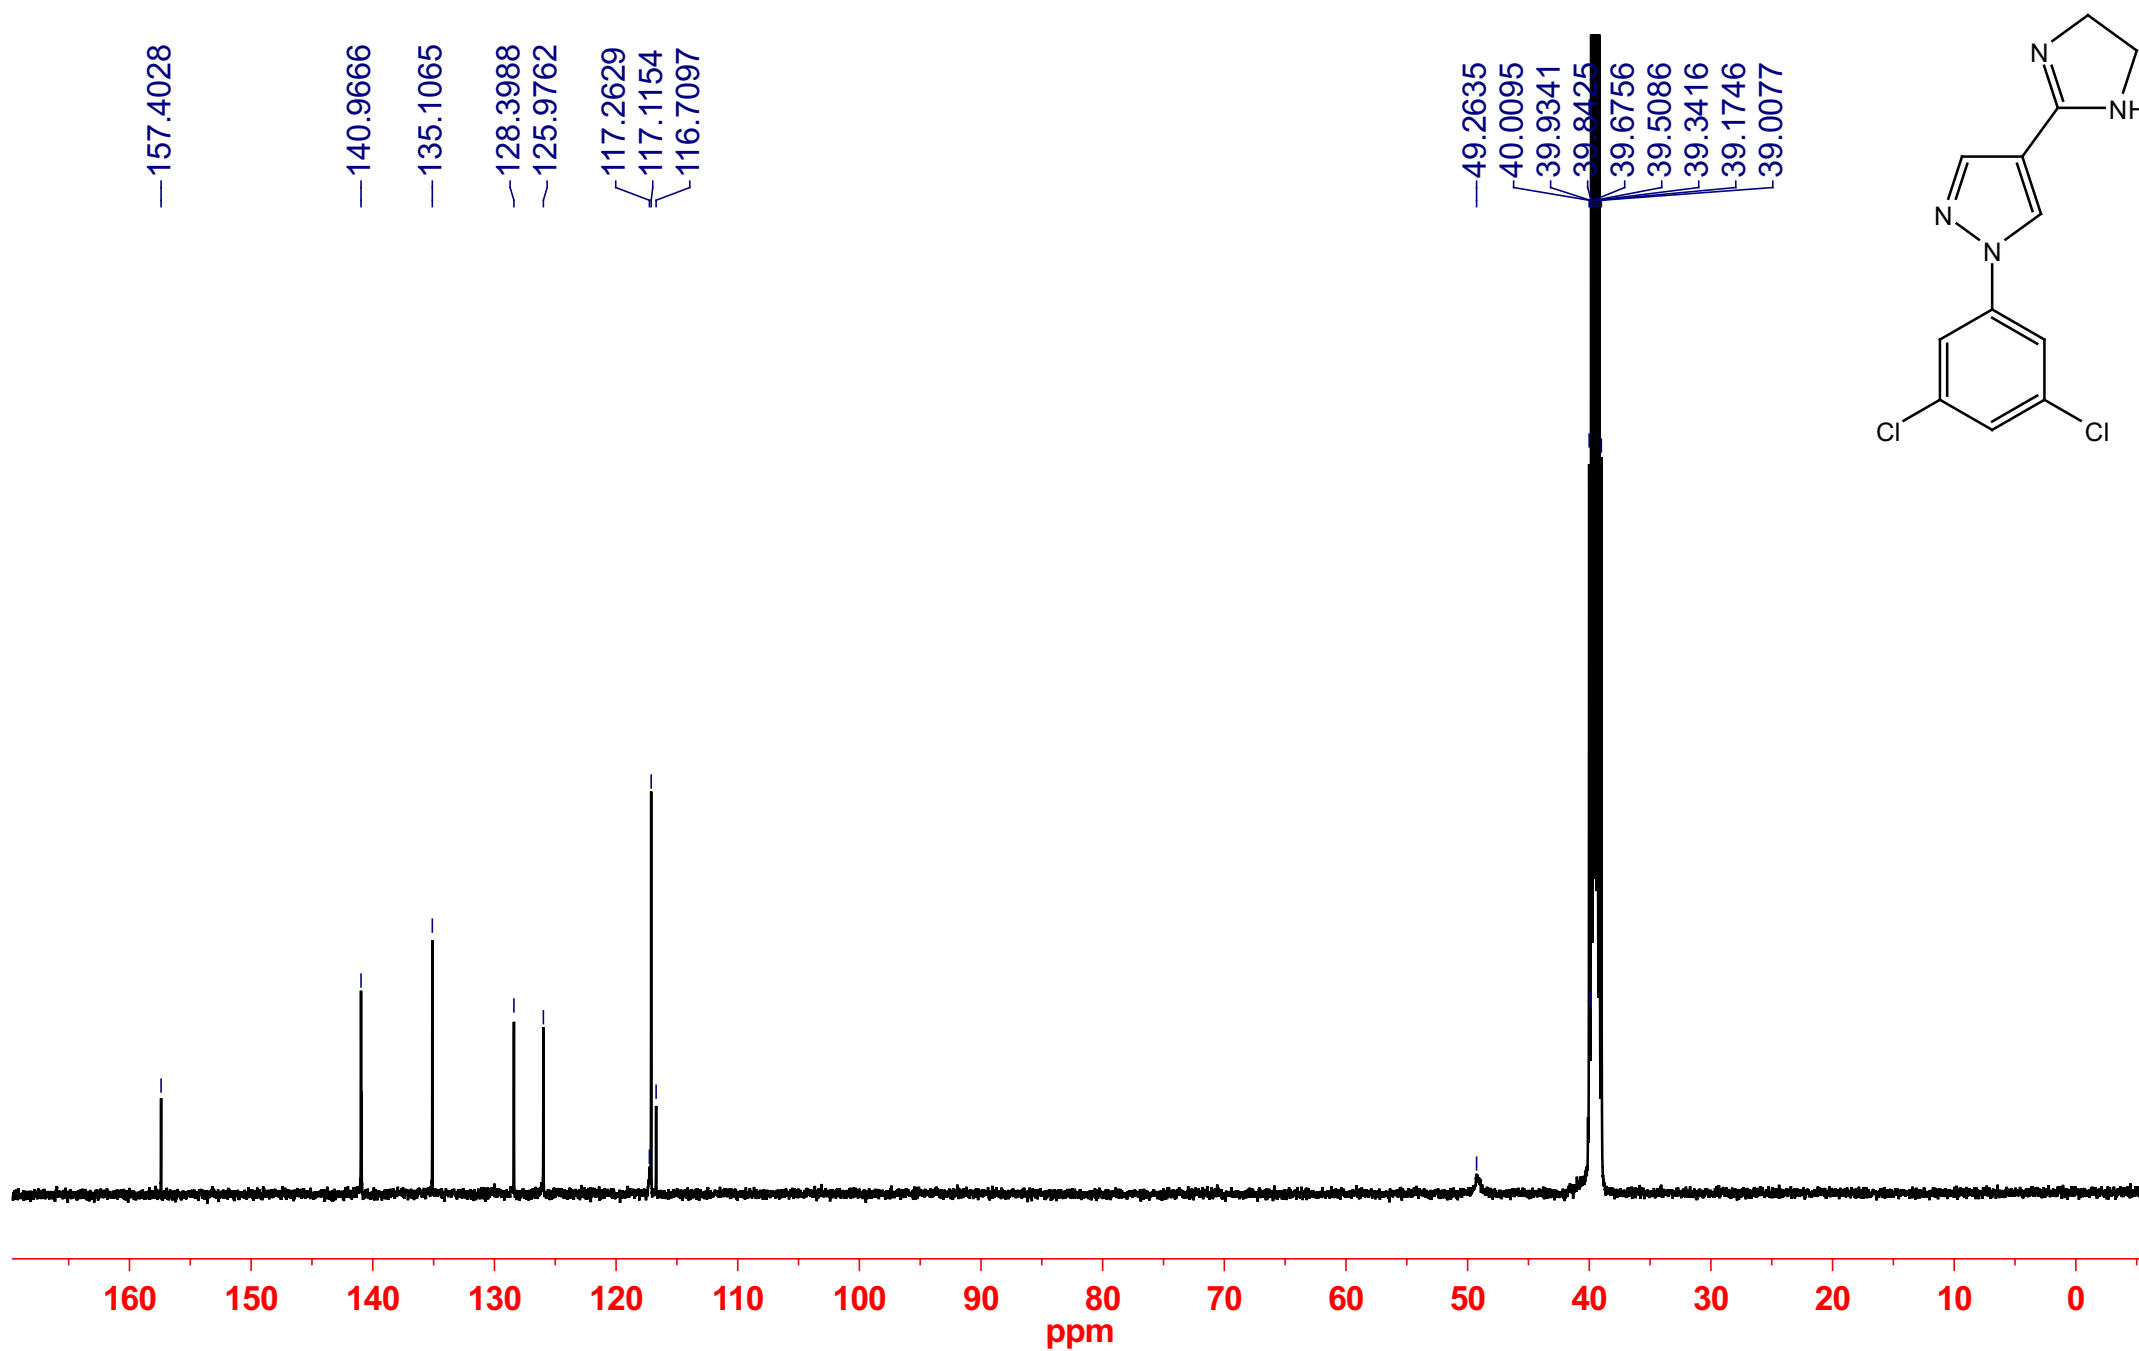

<sup>1</sup>H NMR of compound **3e**

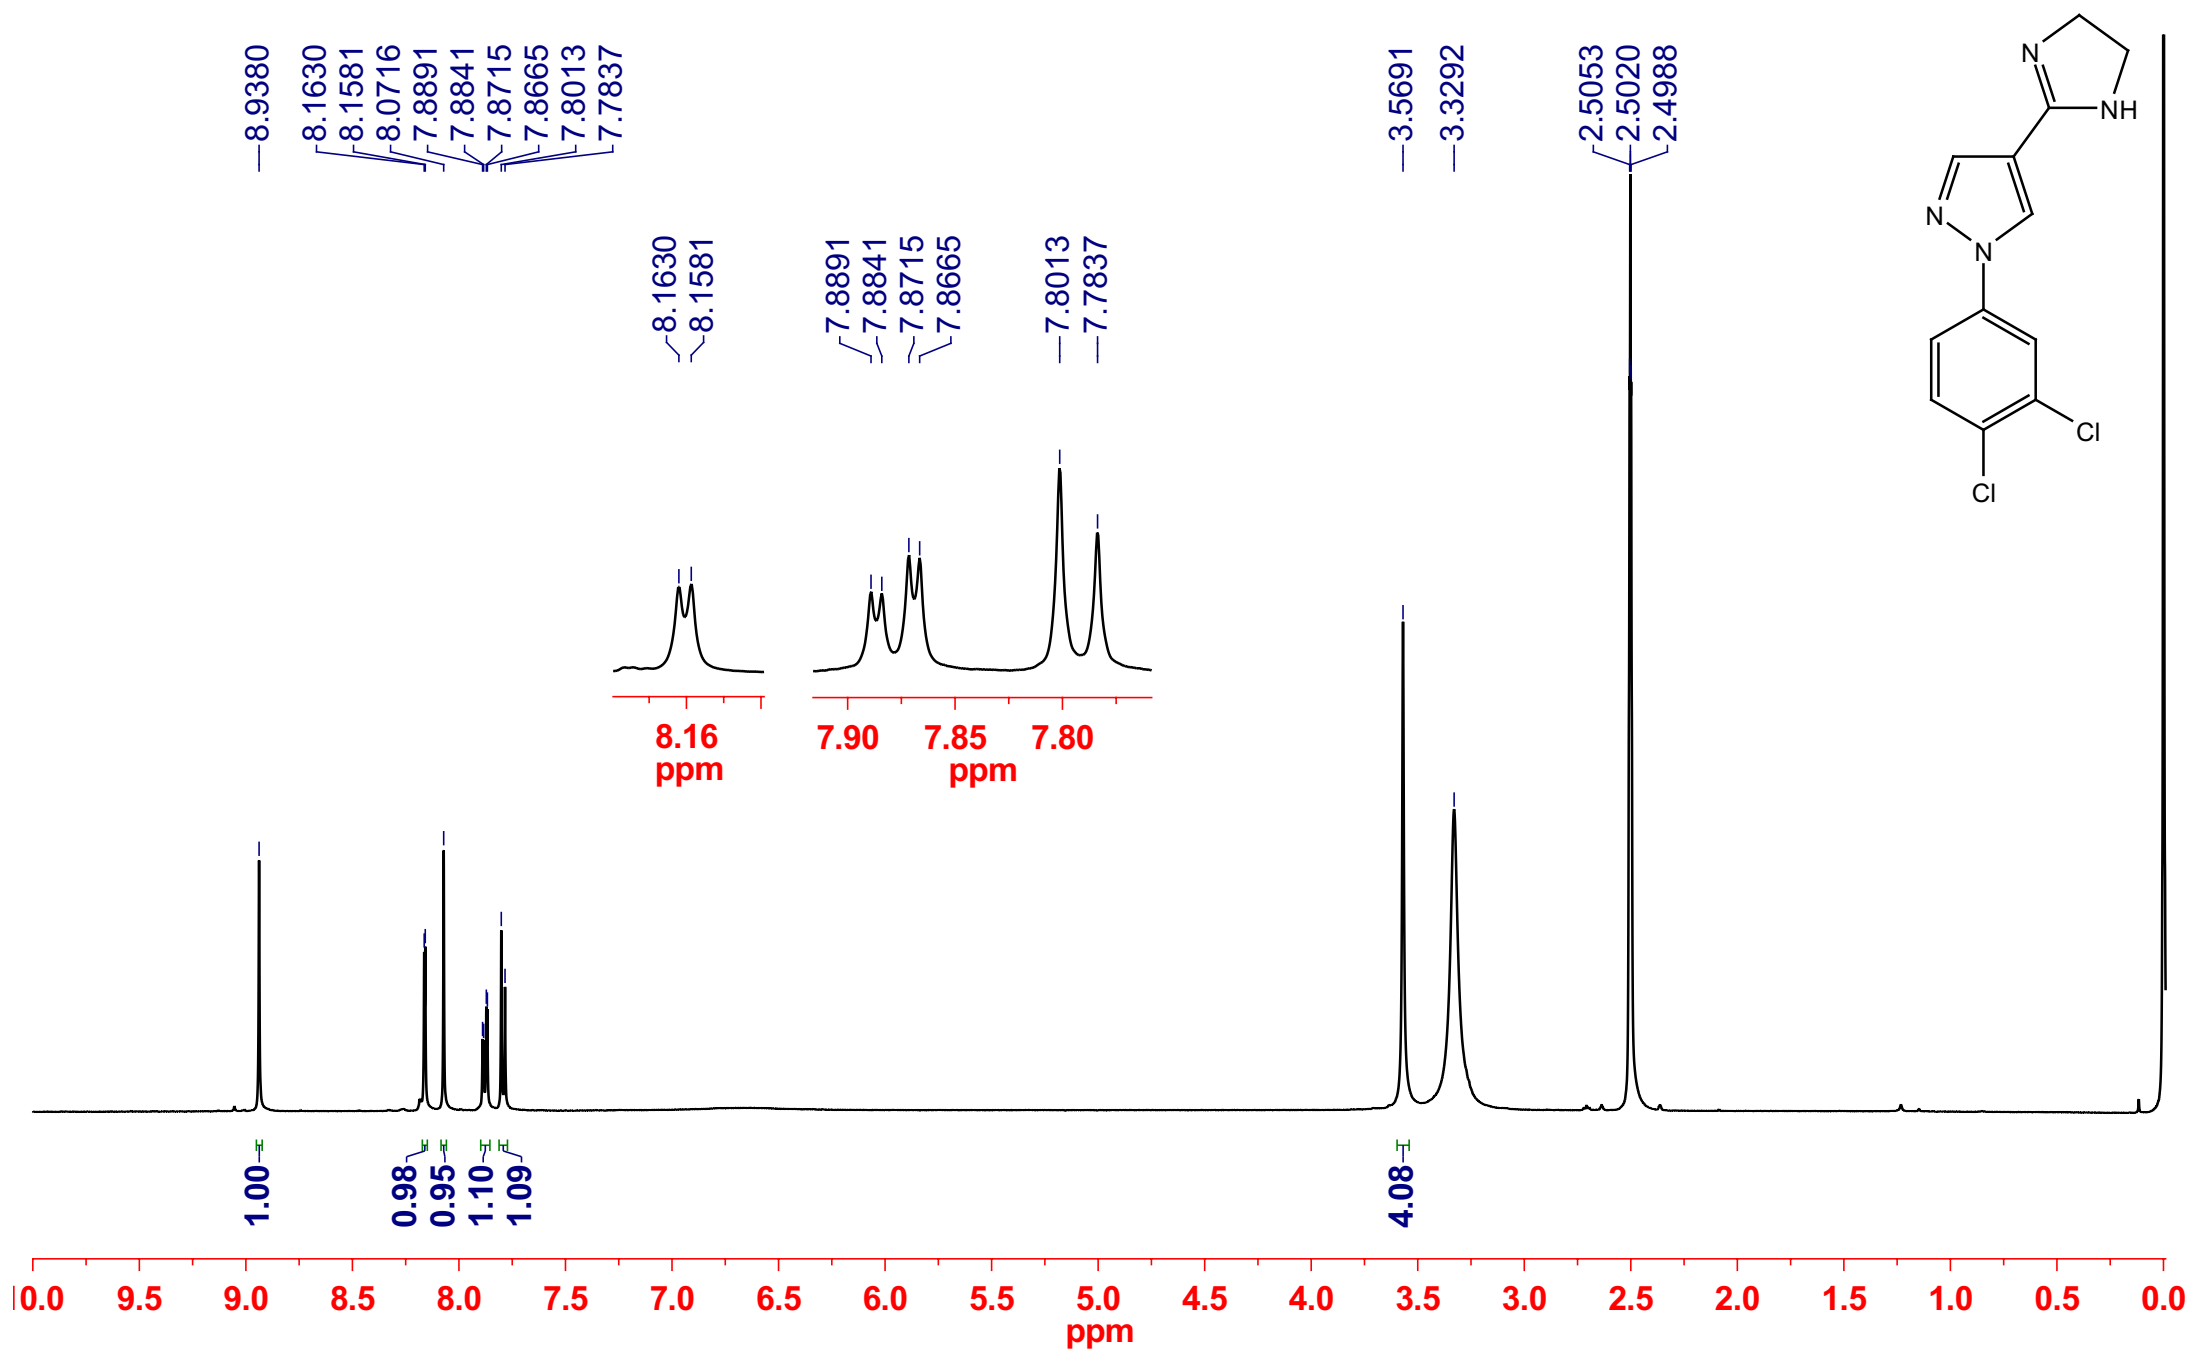

<sup>13</sup>C NMR of compound **3e**

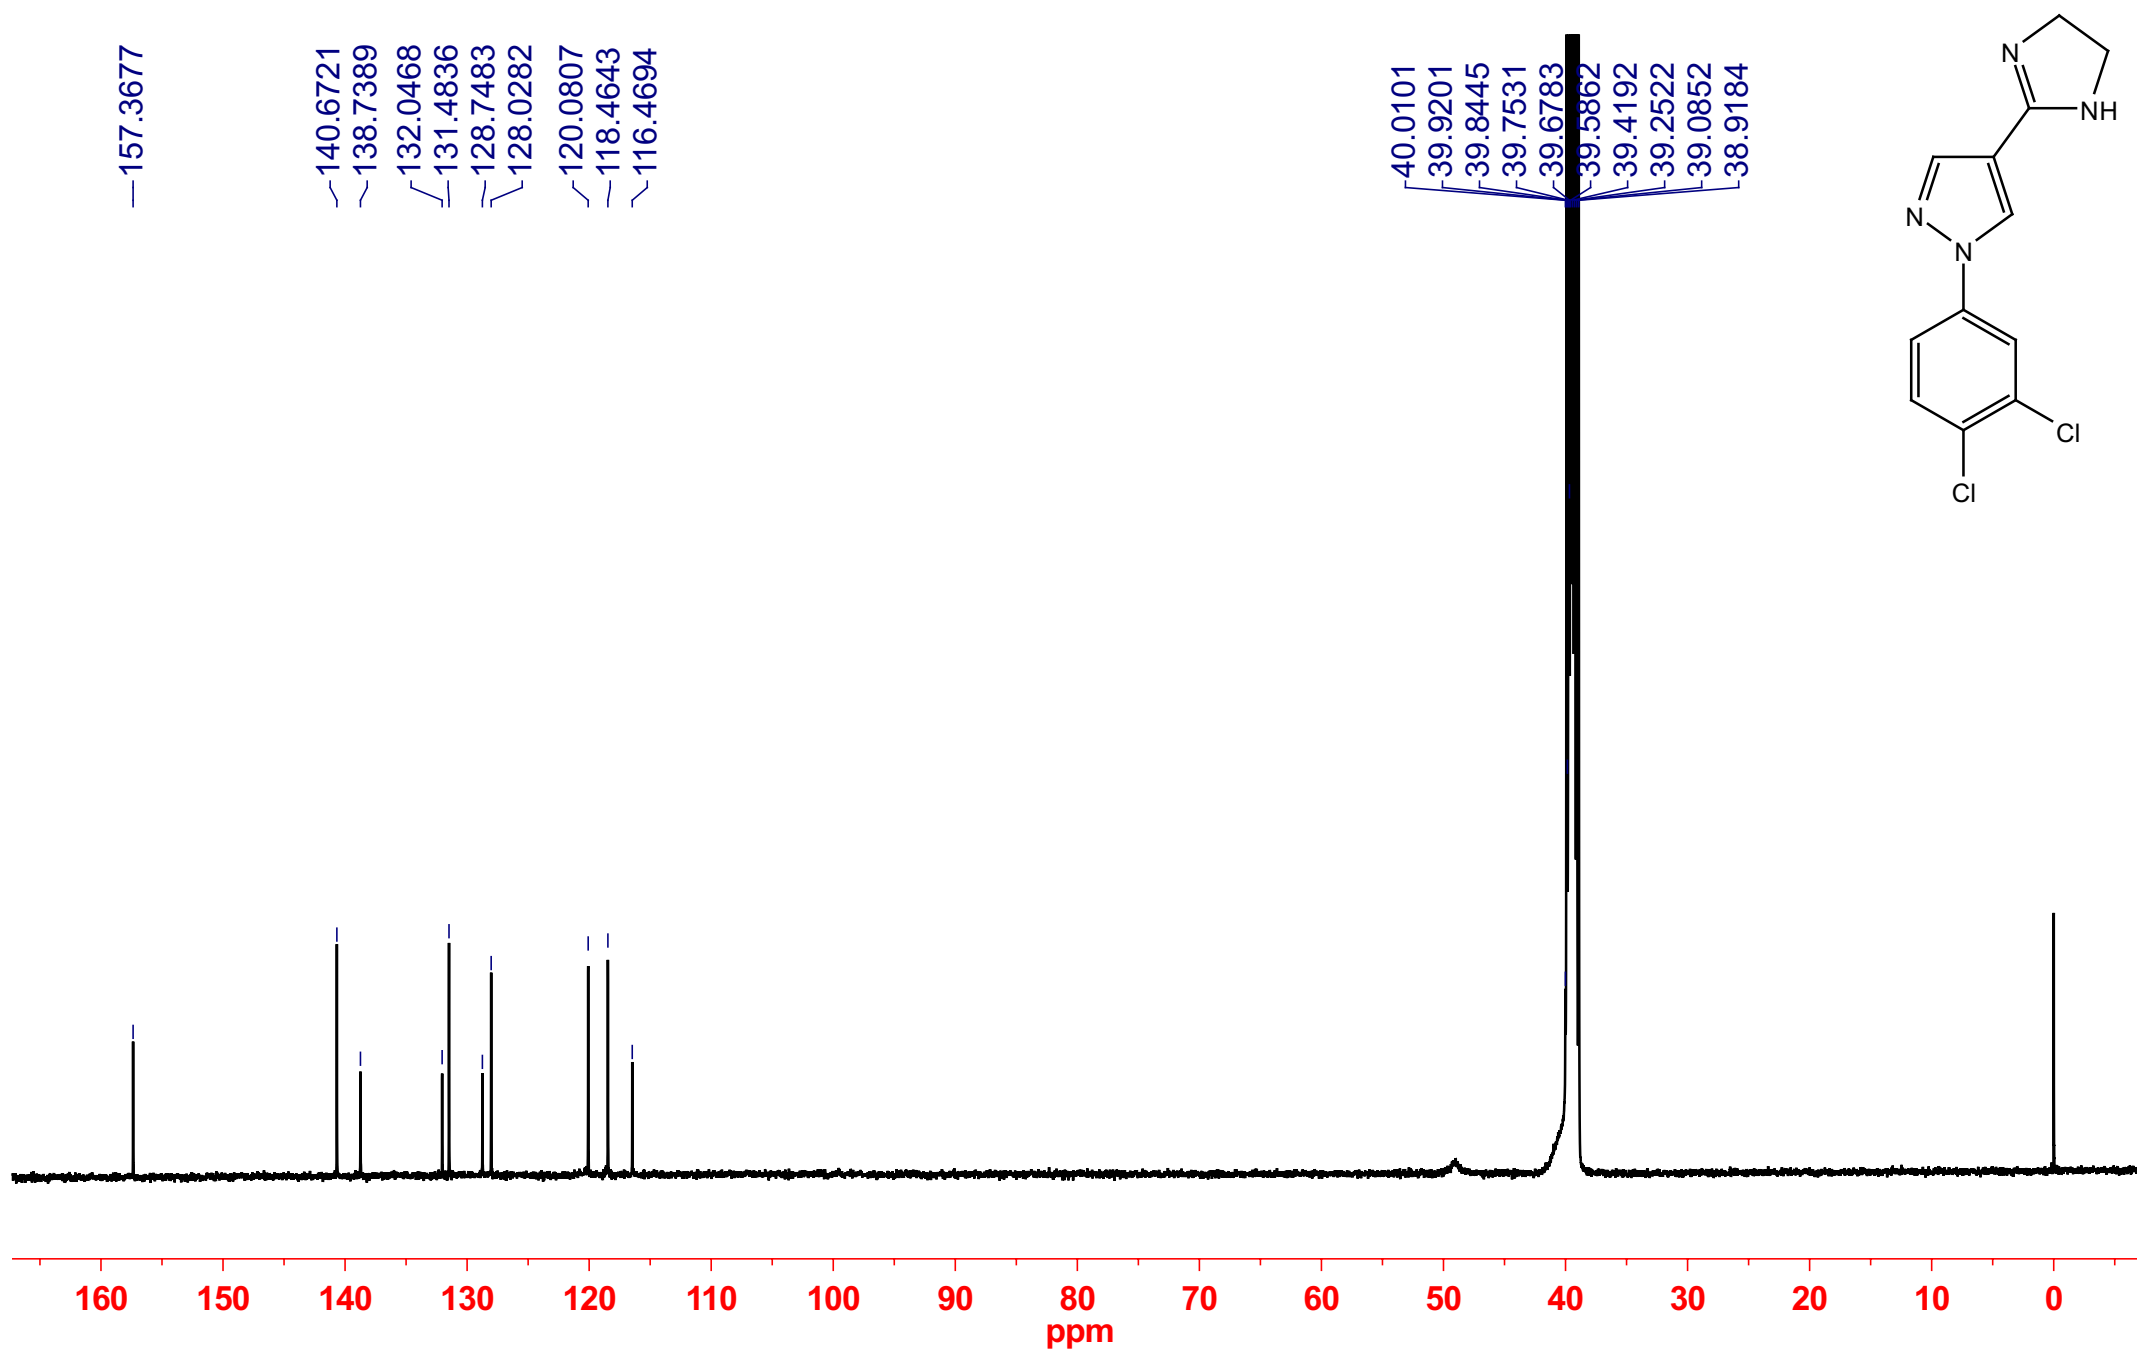

<sup>1</sup>H NMR of compound **3f**

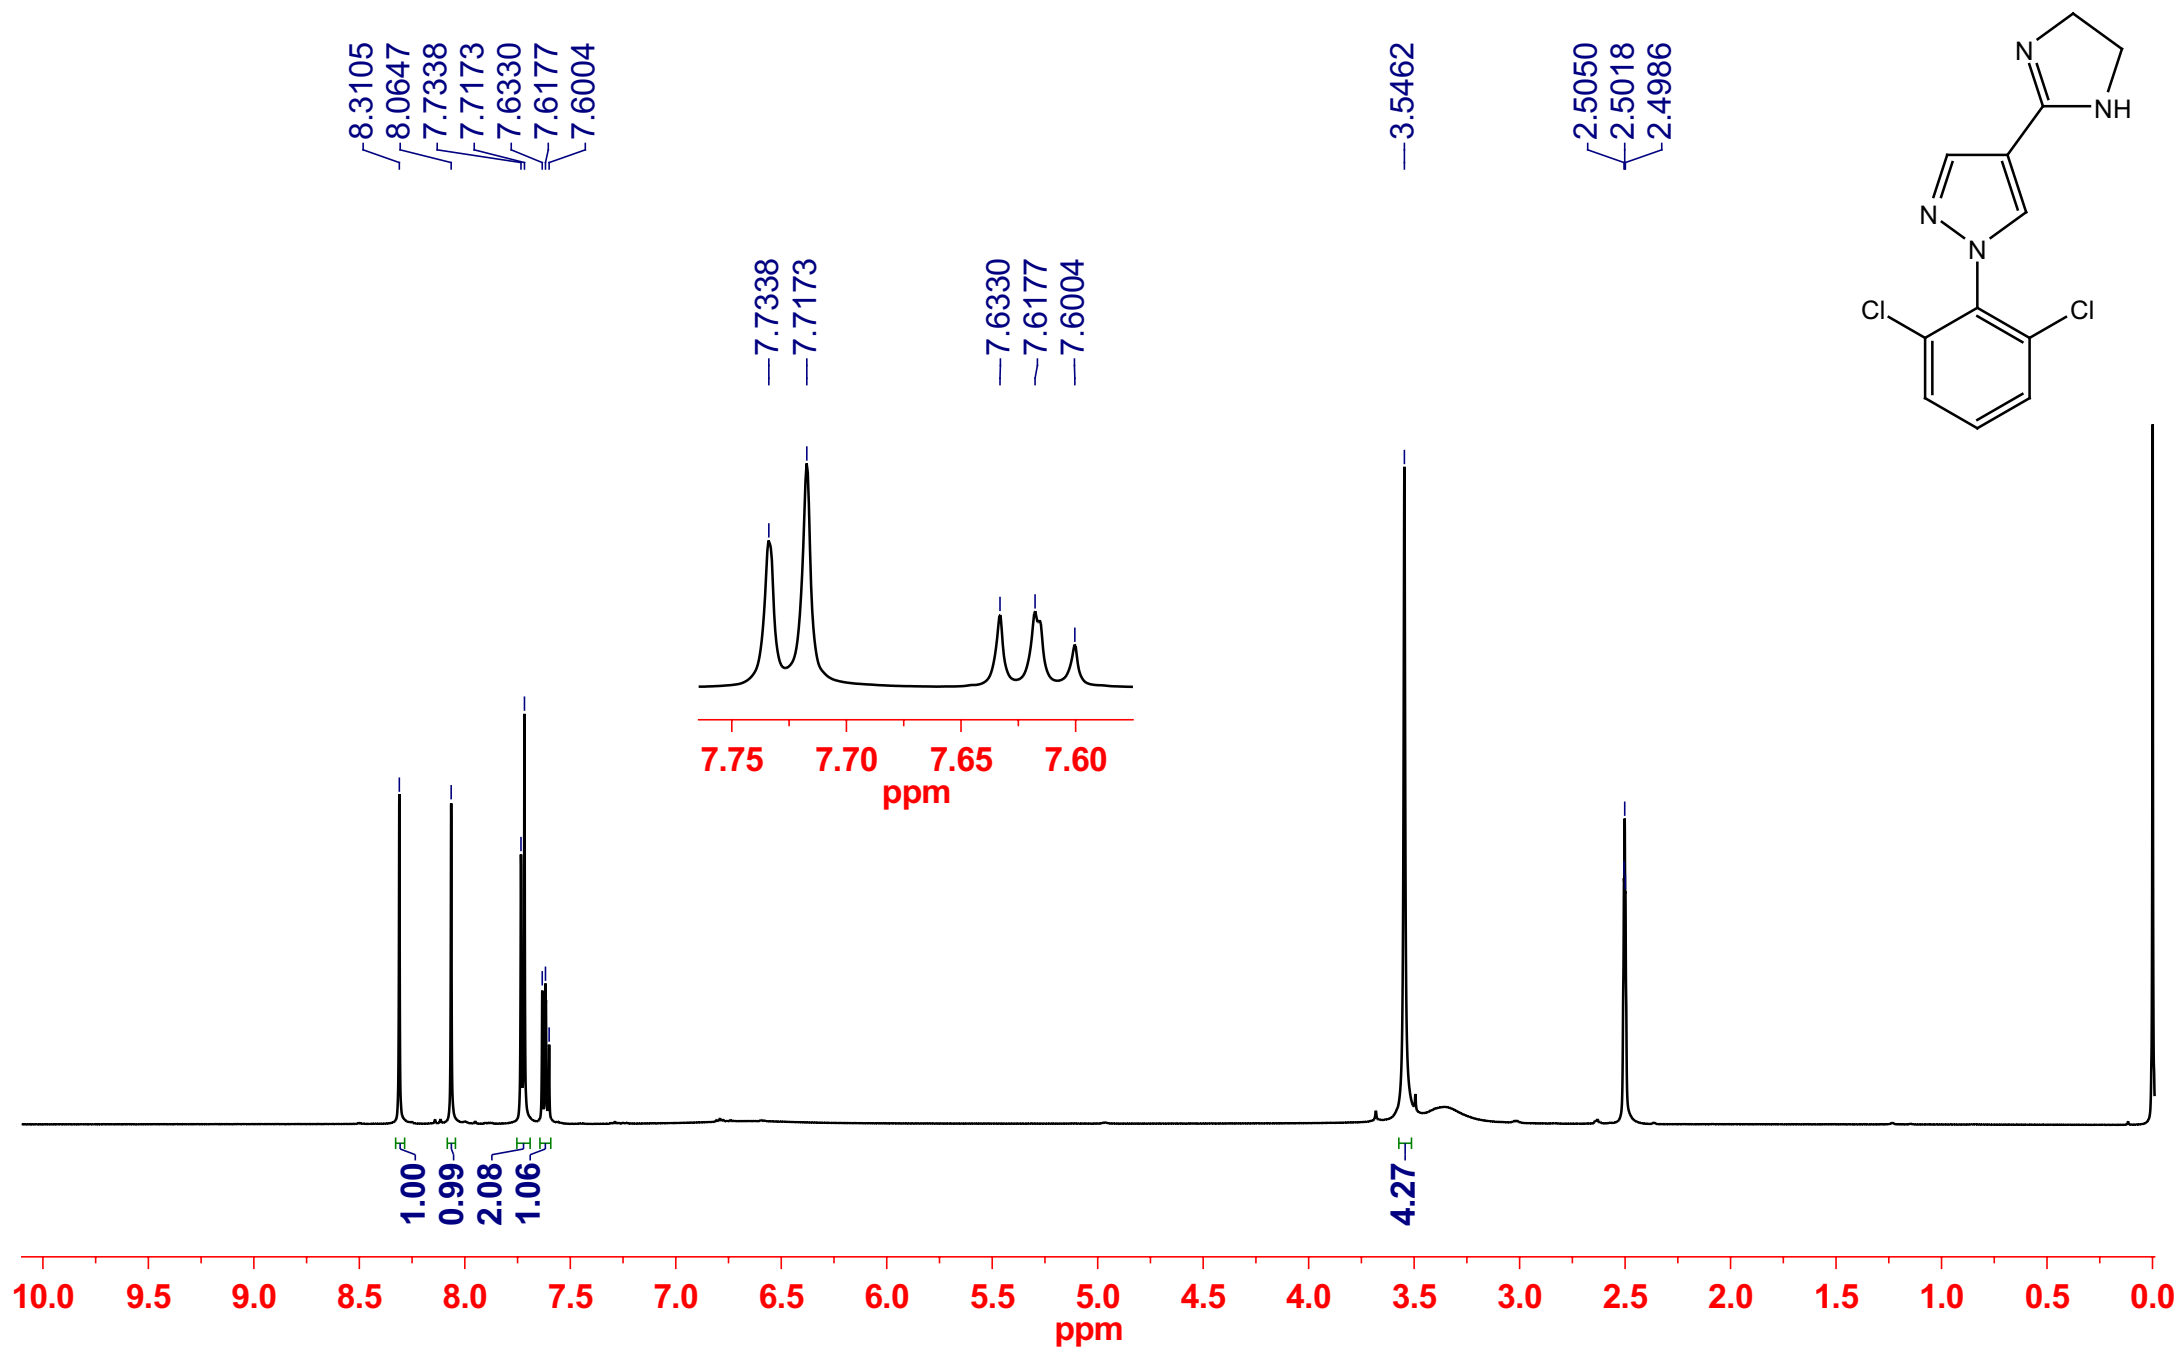

8.3105  
8.0647  
7.7338  
7.7173  
7.6330  
7.6177  
7.6004

3.5462

2.5050  
2.5018  
2.4986

7.7338  
7.7173

7.6330  
7.6177  
7.6004

7.75 7.70 7.65 7.60  
ppm

1.00  
0.99  
2.08  
1.06

4.27

$^{13}\text{C}$  NMR of compound **3f**

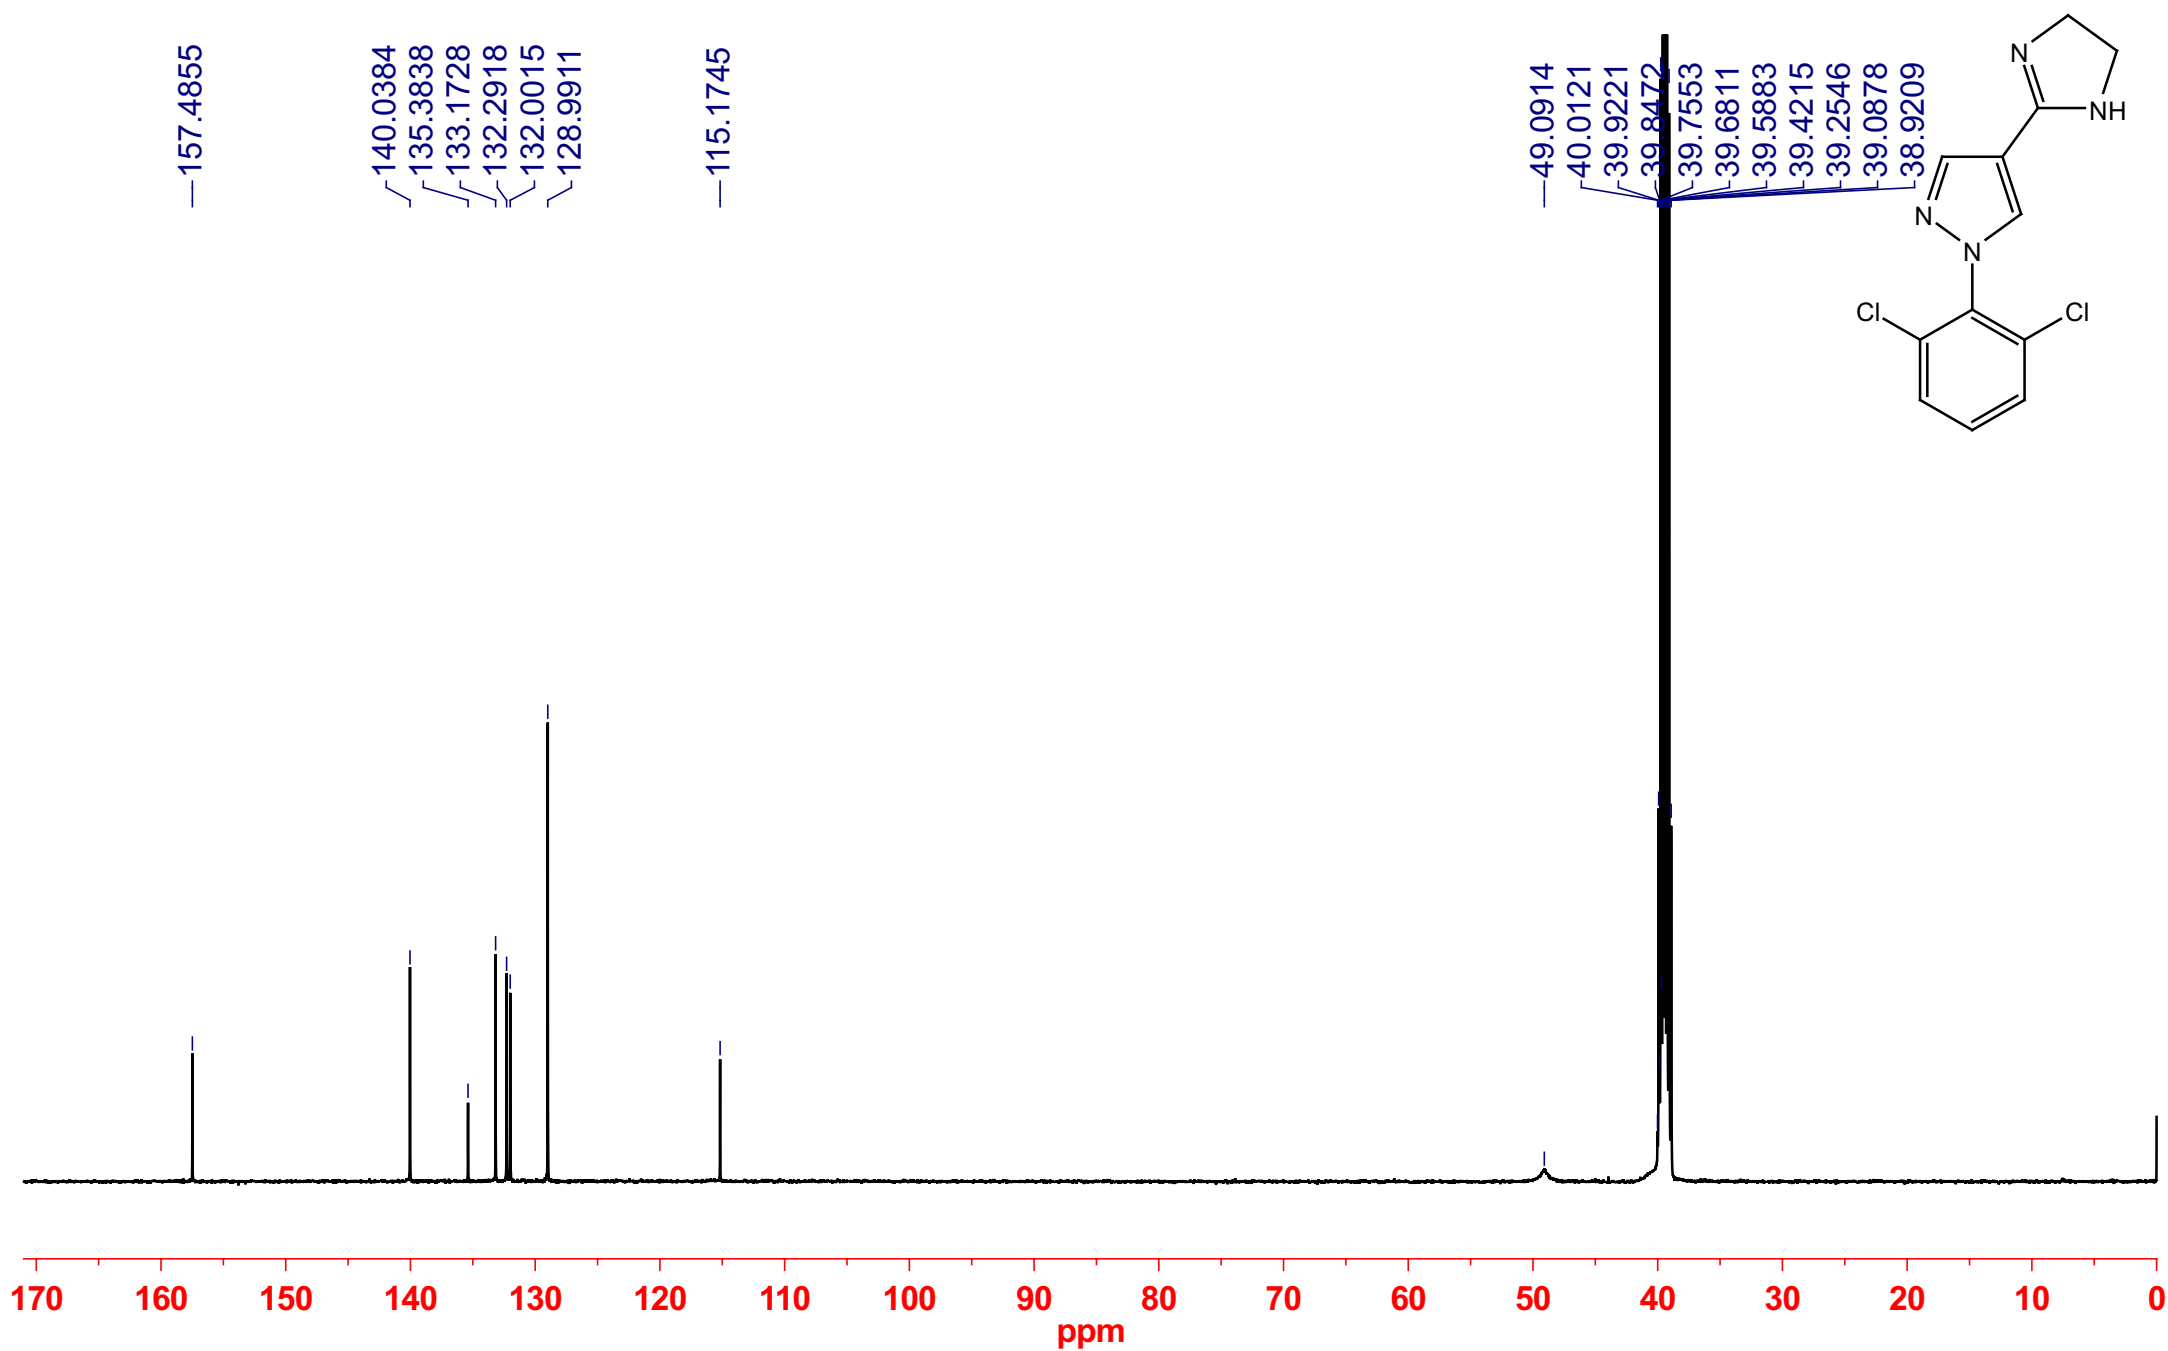



<sup>1</sup>H NMR of compound **3g**

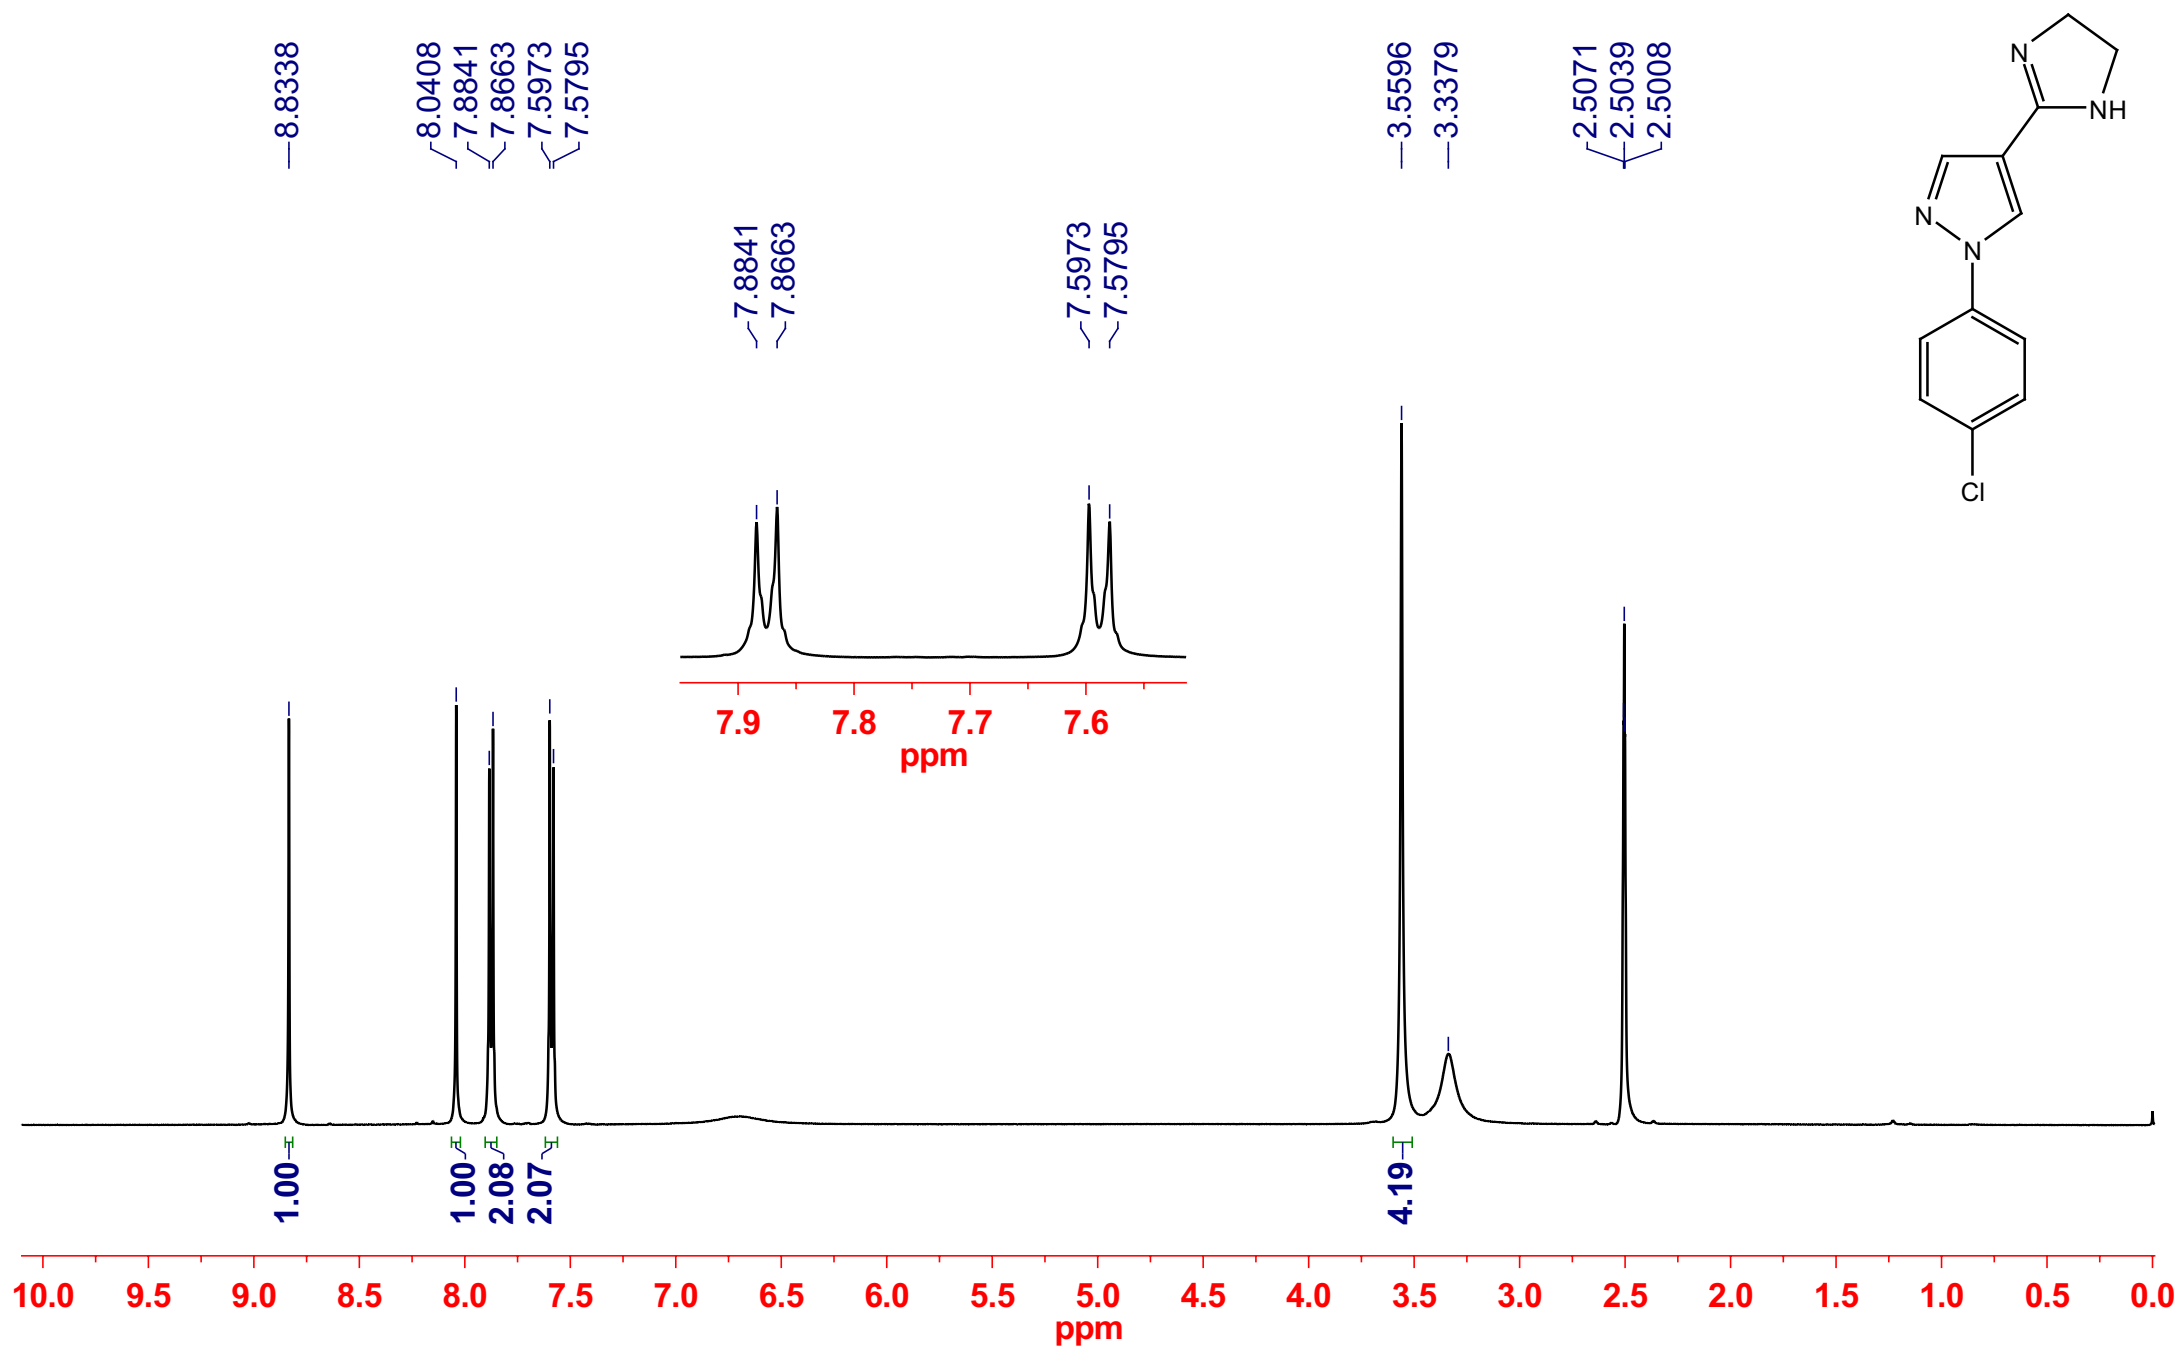

<sup>13</sup>C NMR of compound **3g**

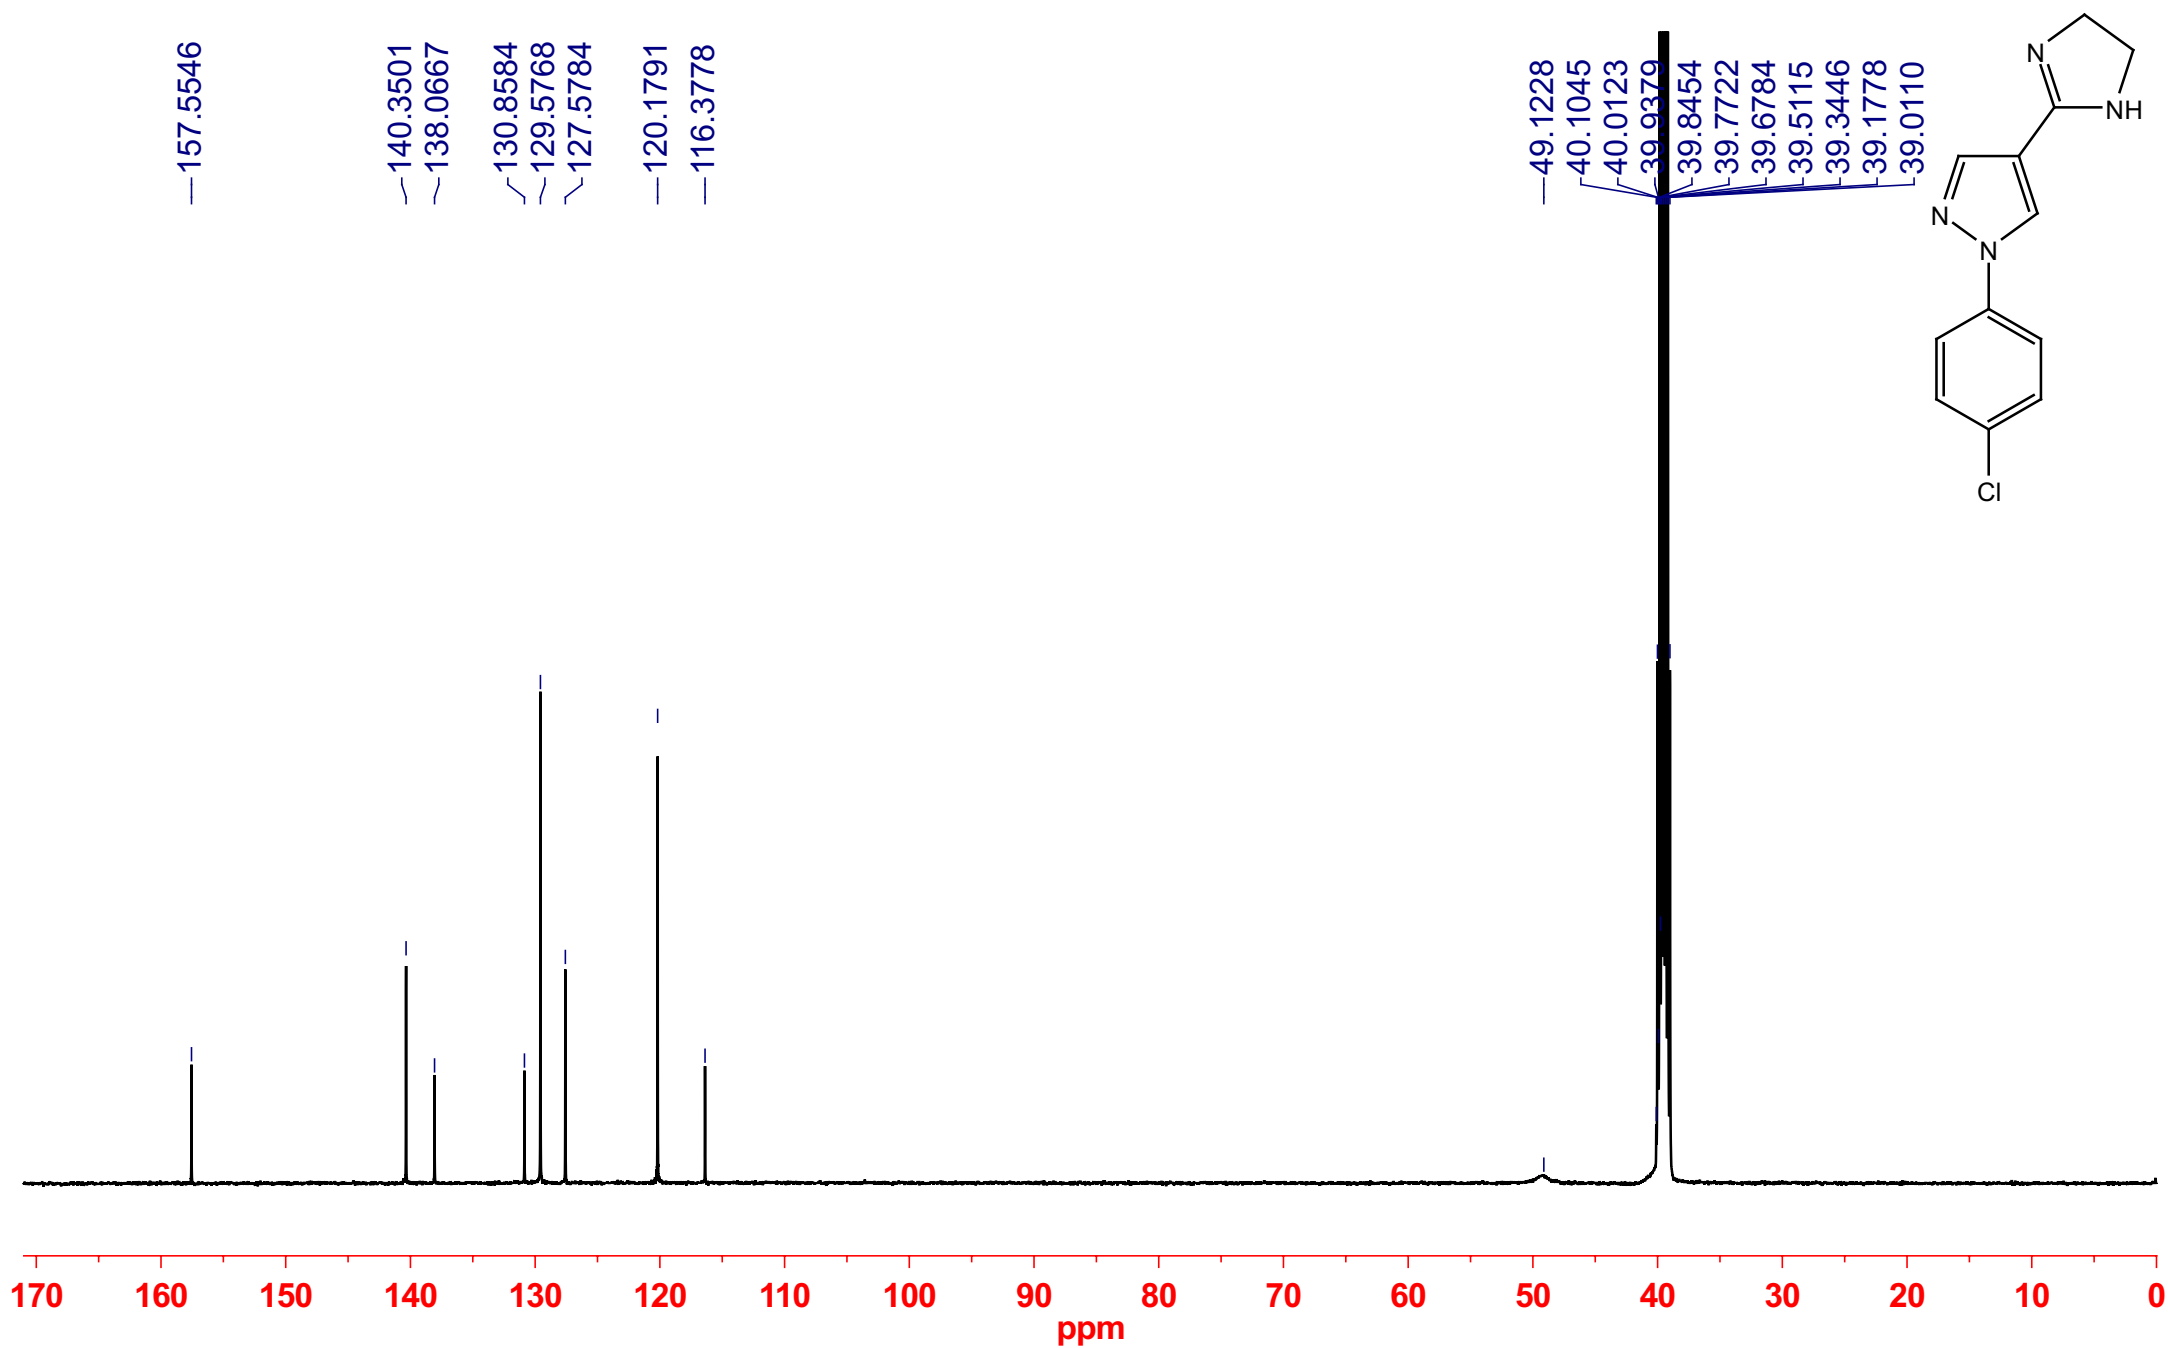

<sup>1</sup>H NMR of compound **3h**

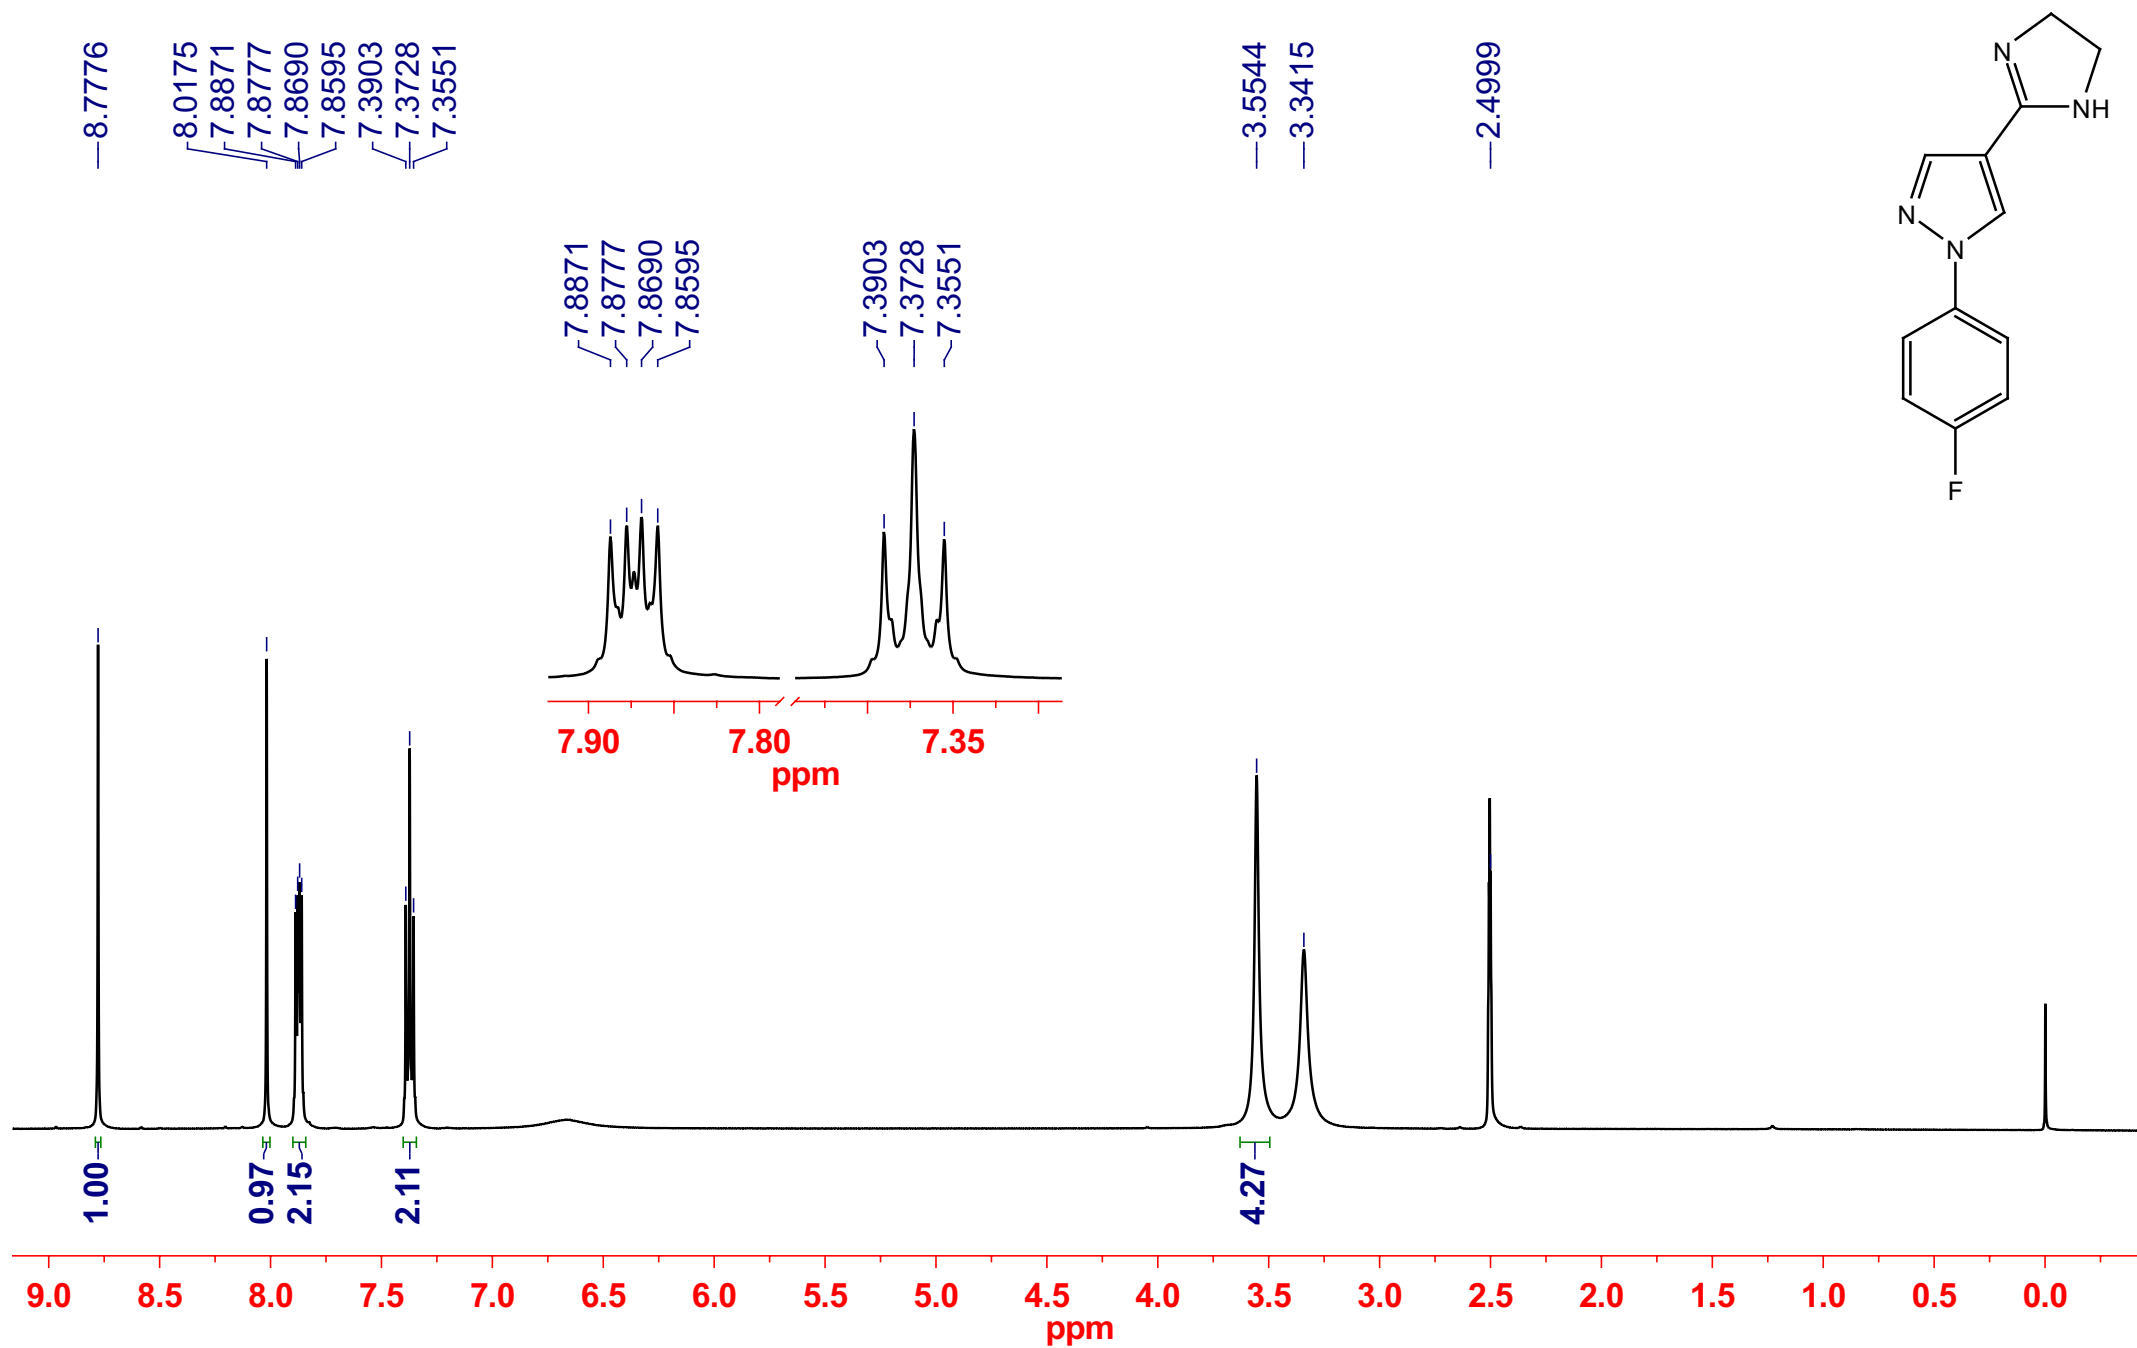

<sup>13</sup>C NMR of compound **3h**

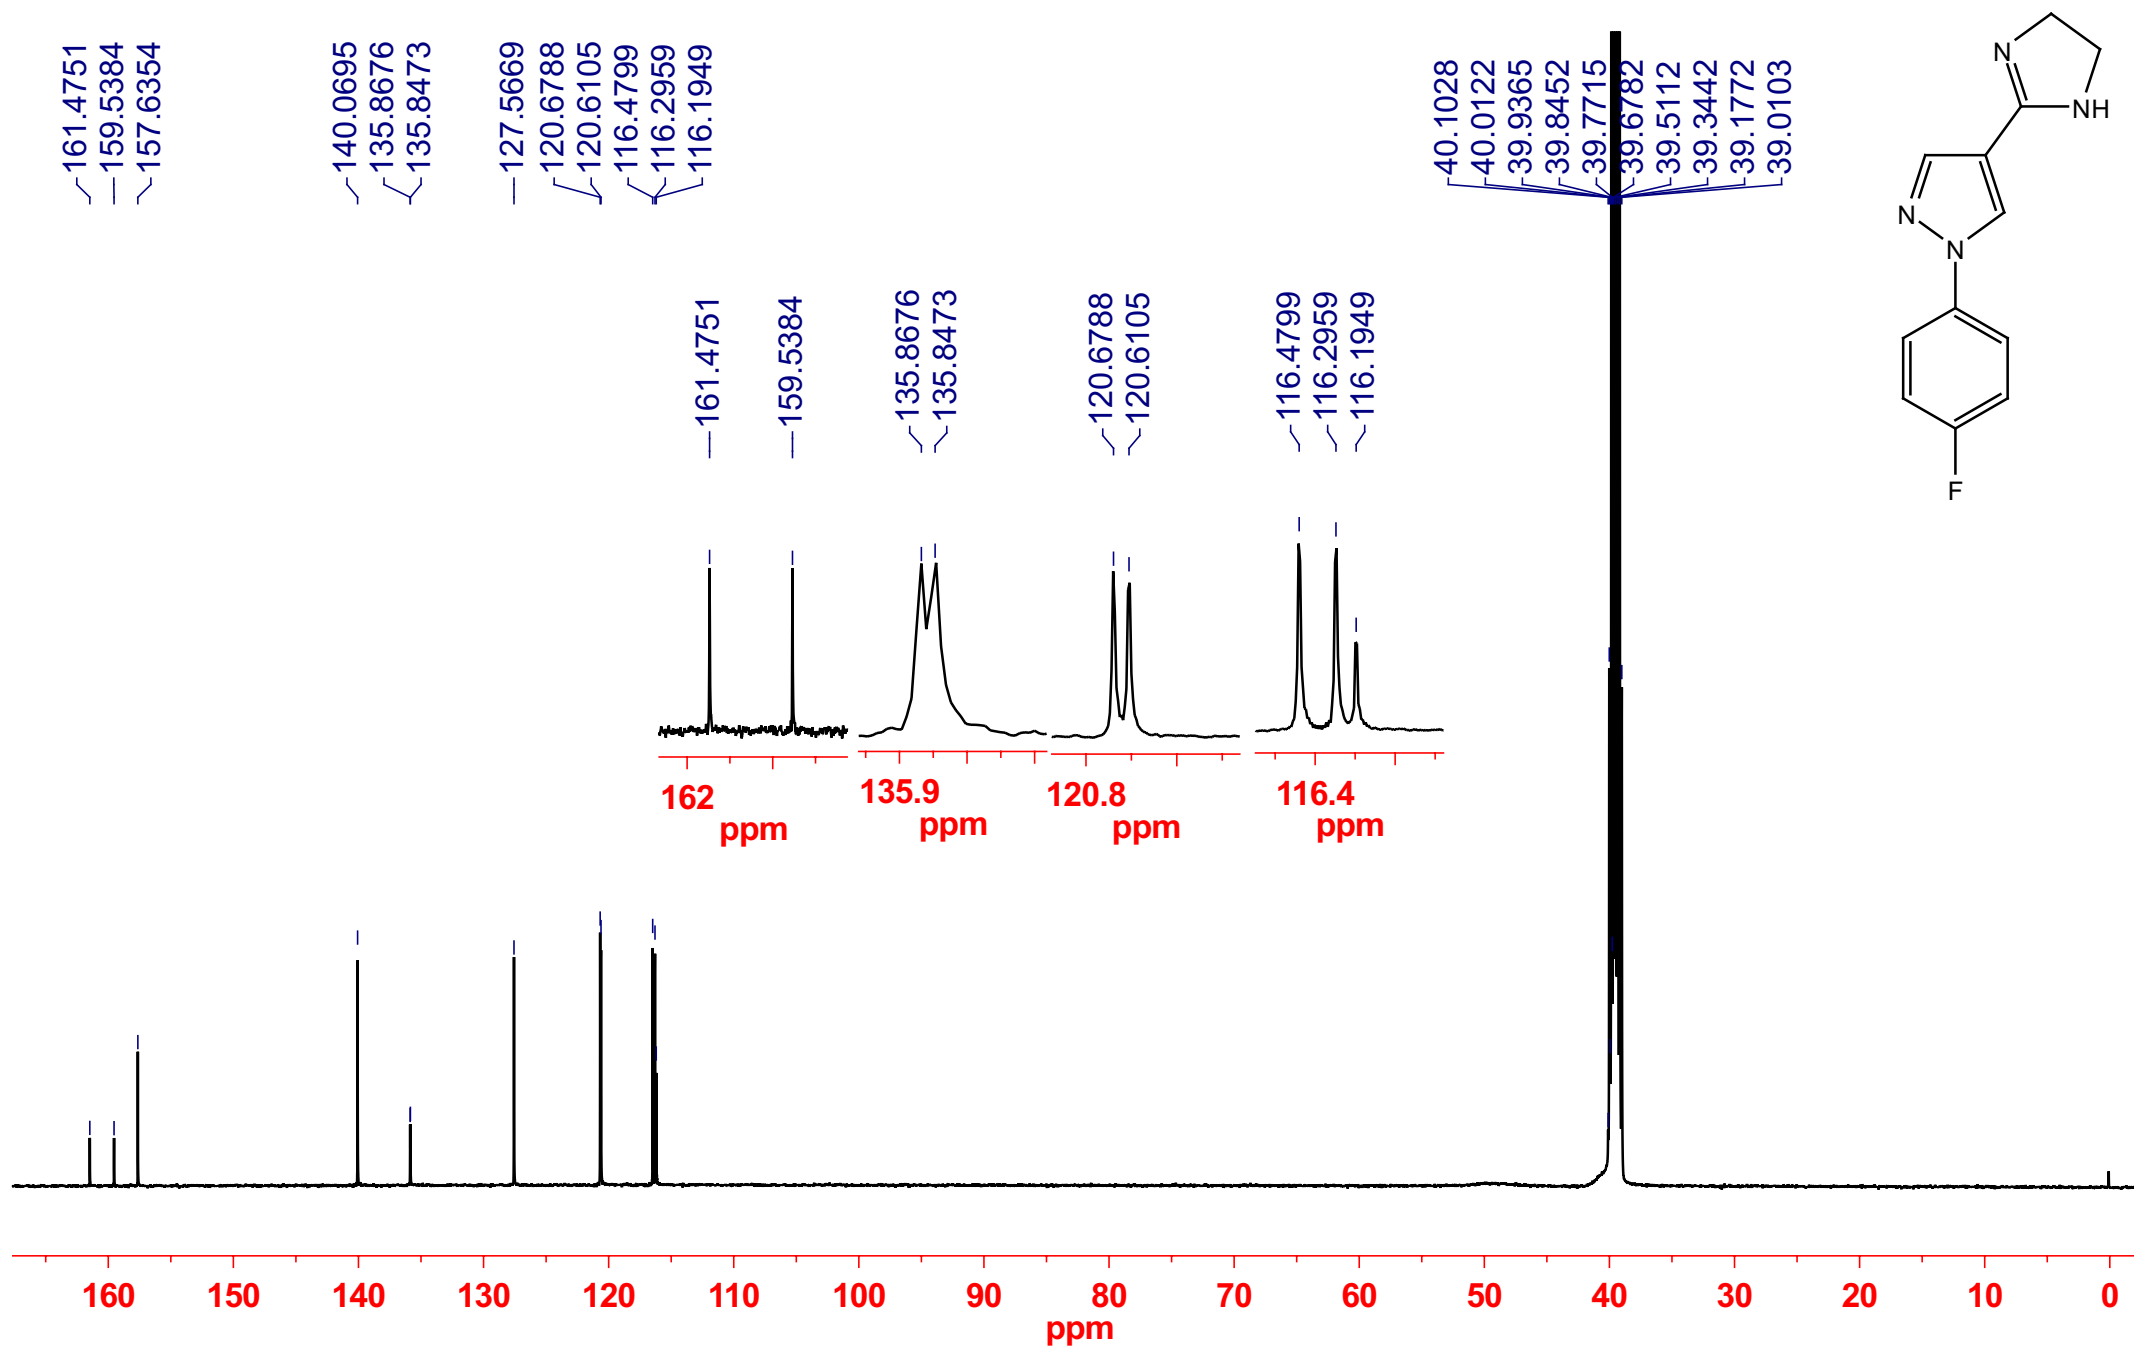

<sup>1</sup>H NMR of compound **3i**

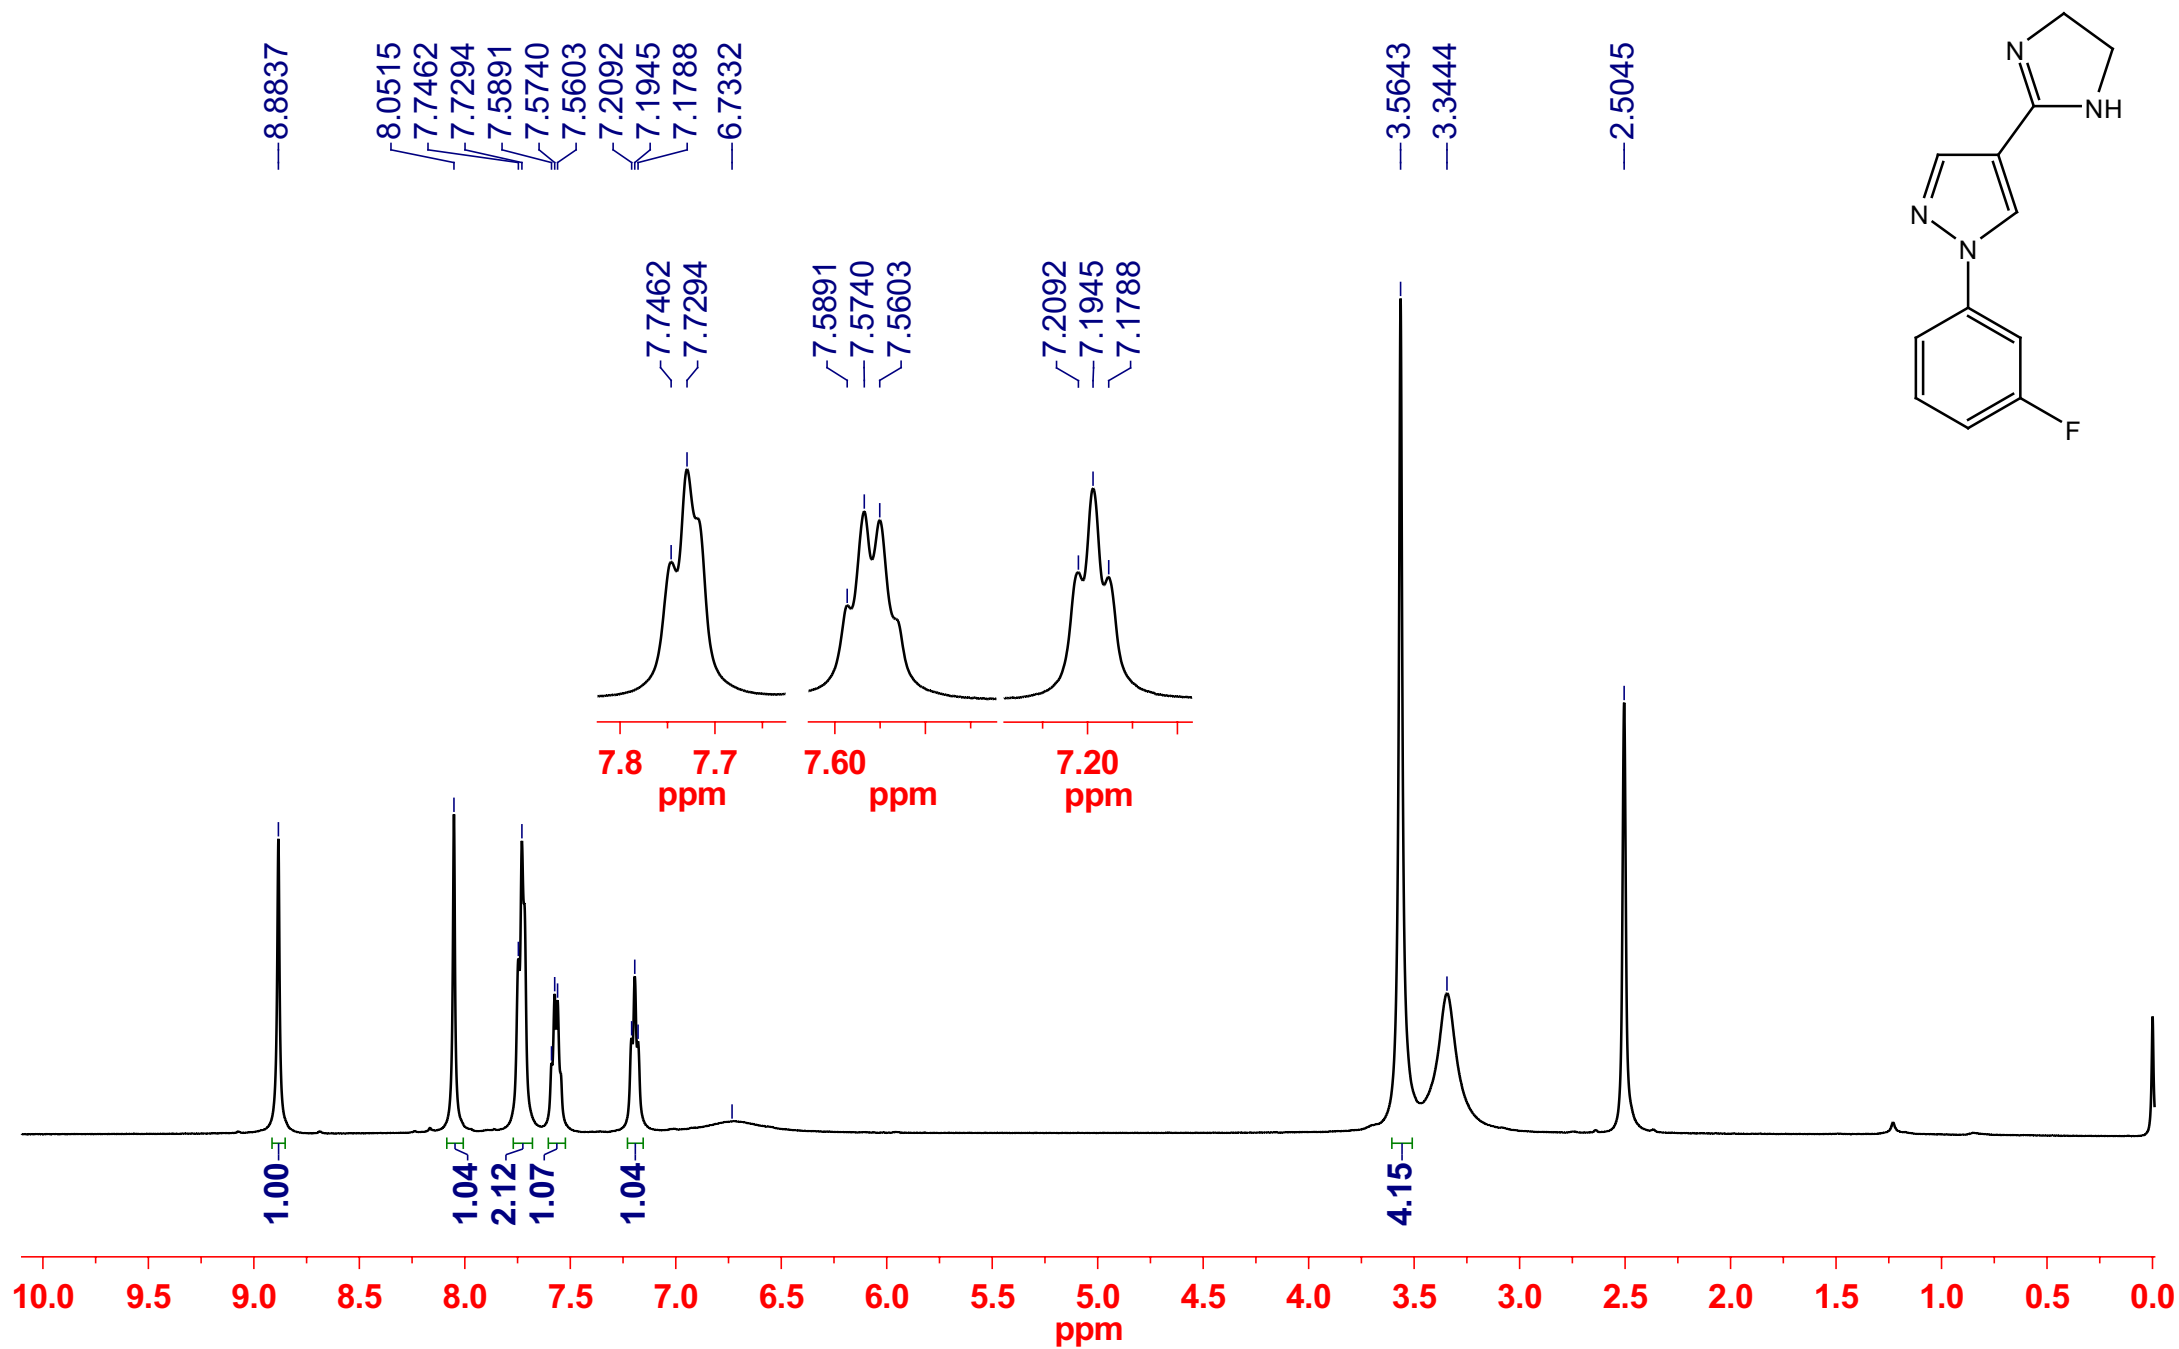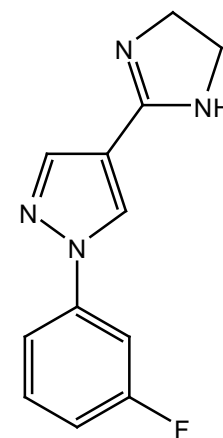

<sup>13</sup>C NMR of compound **3i**

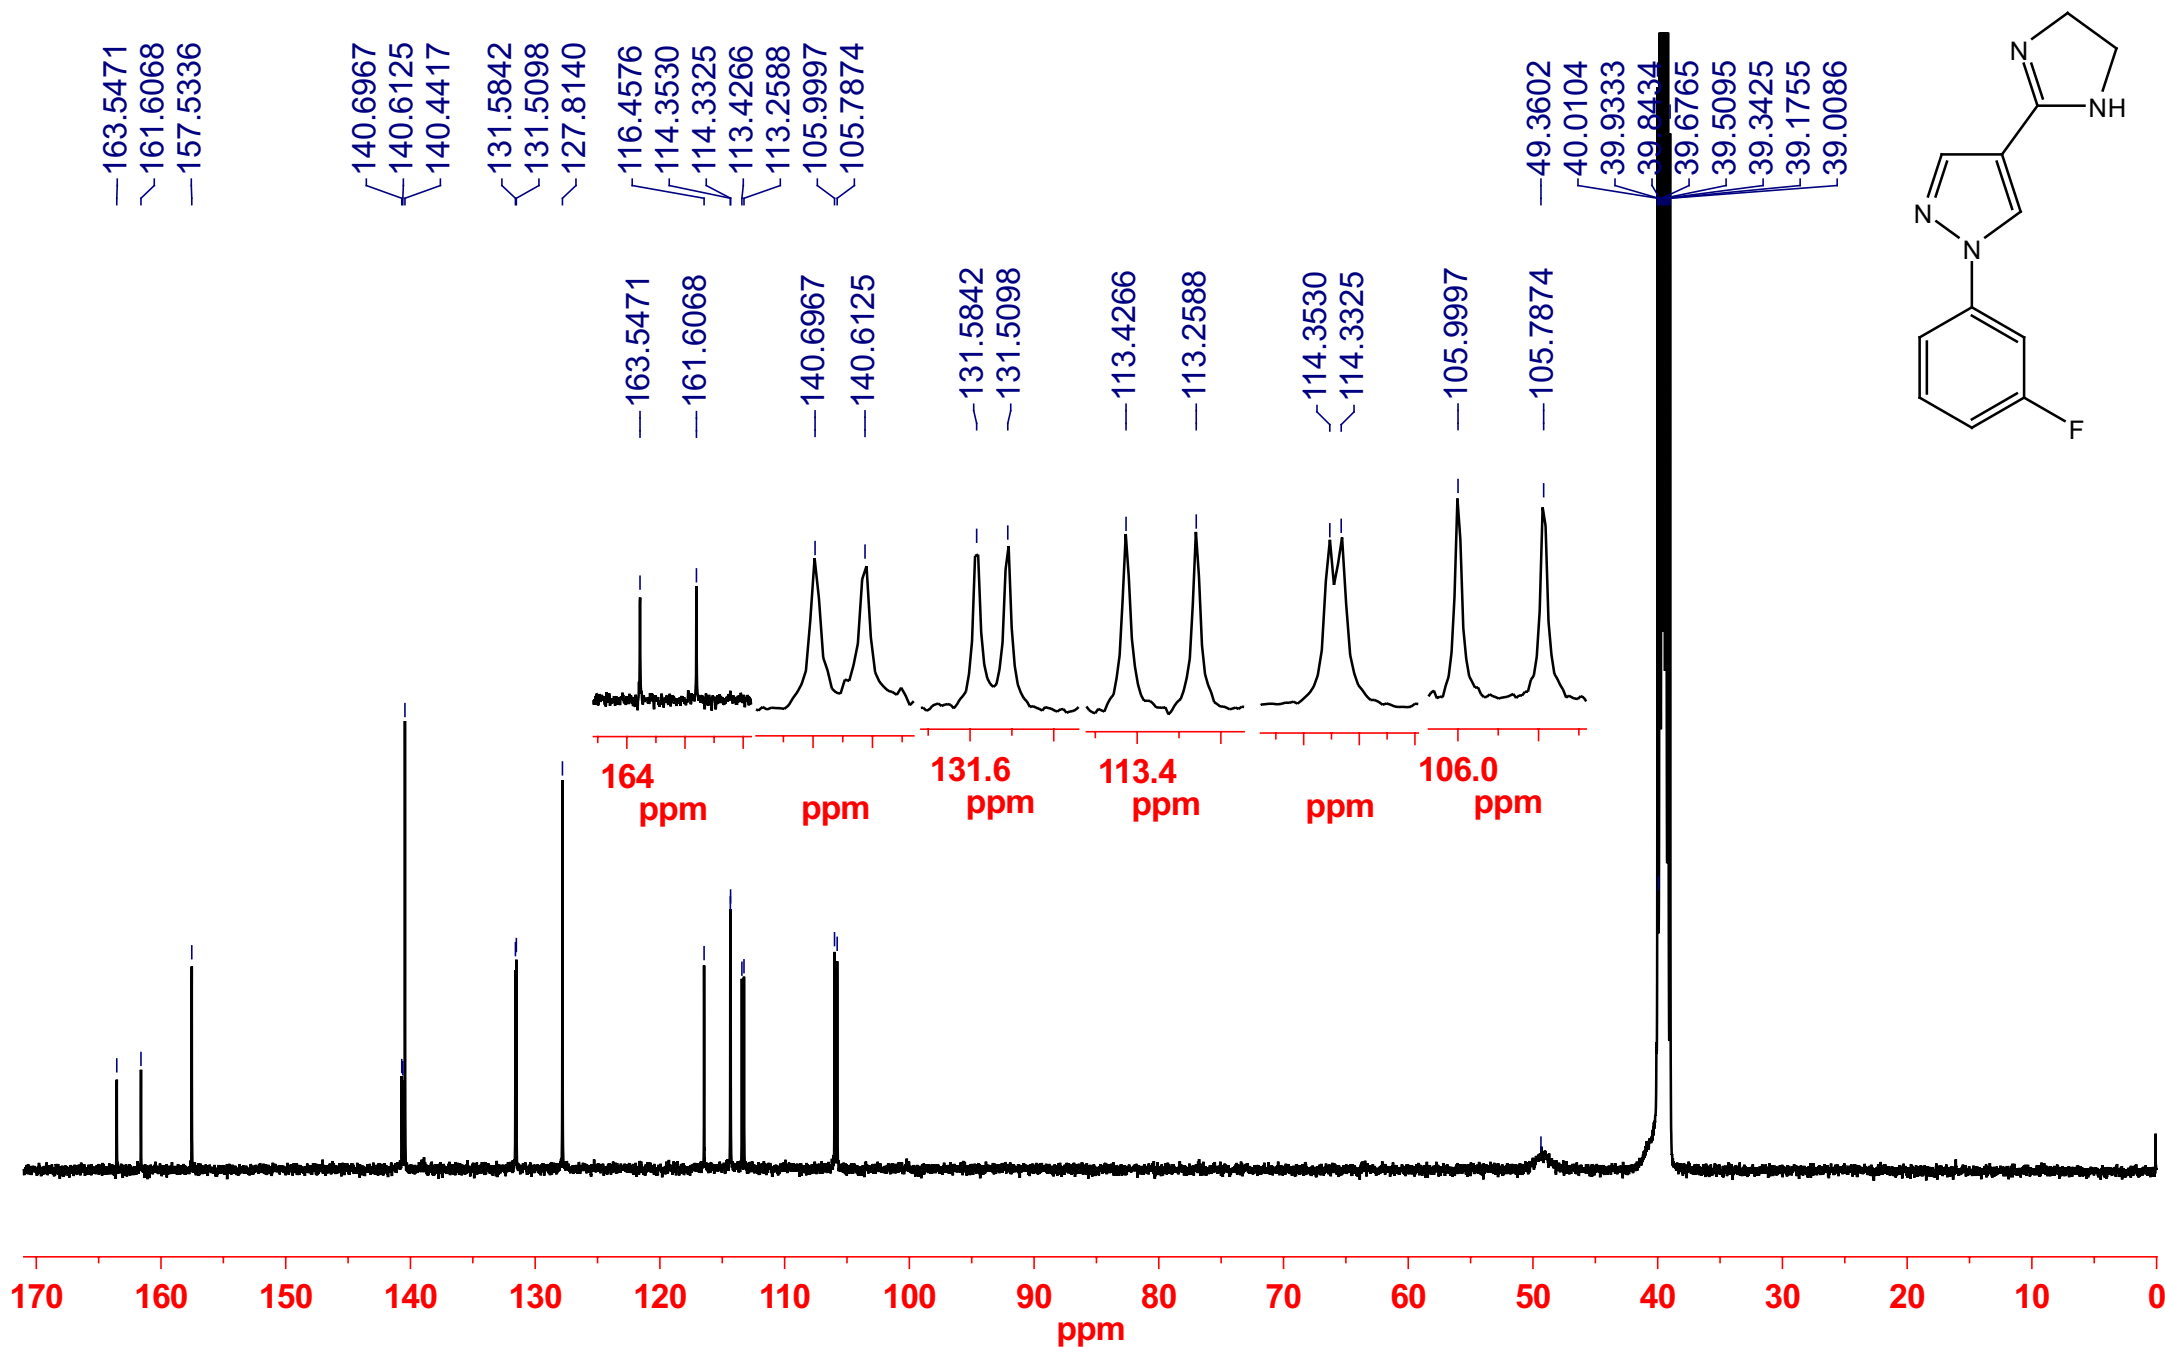

<sup>1</sup>H NMR of compound **3j**

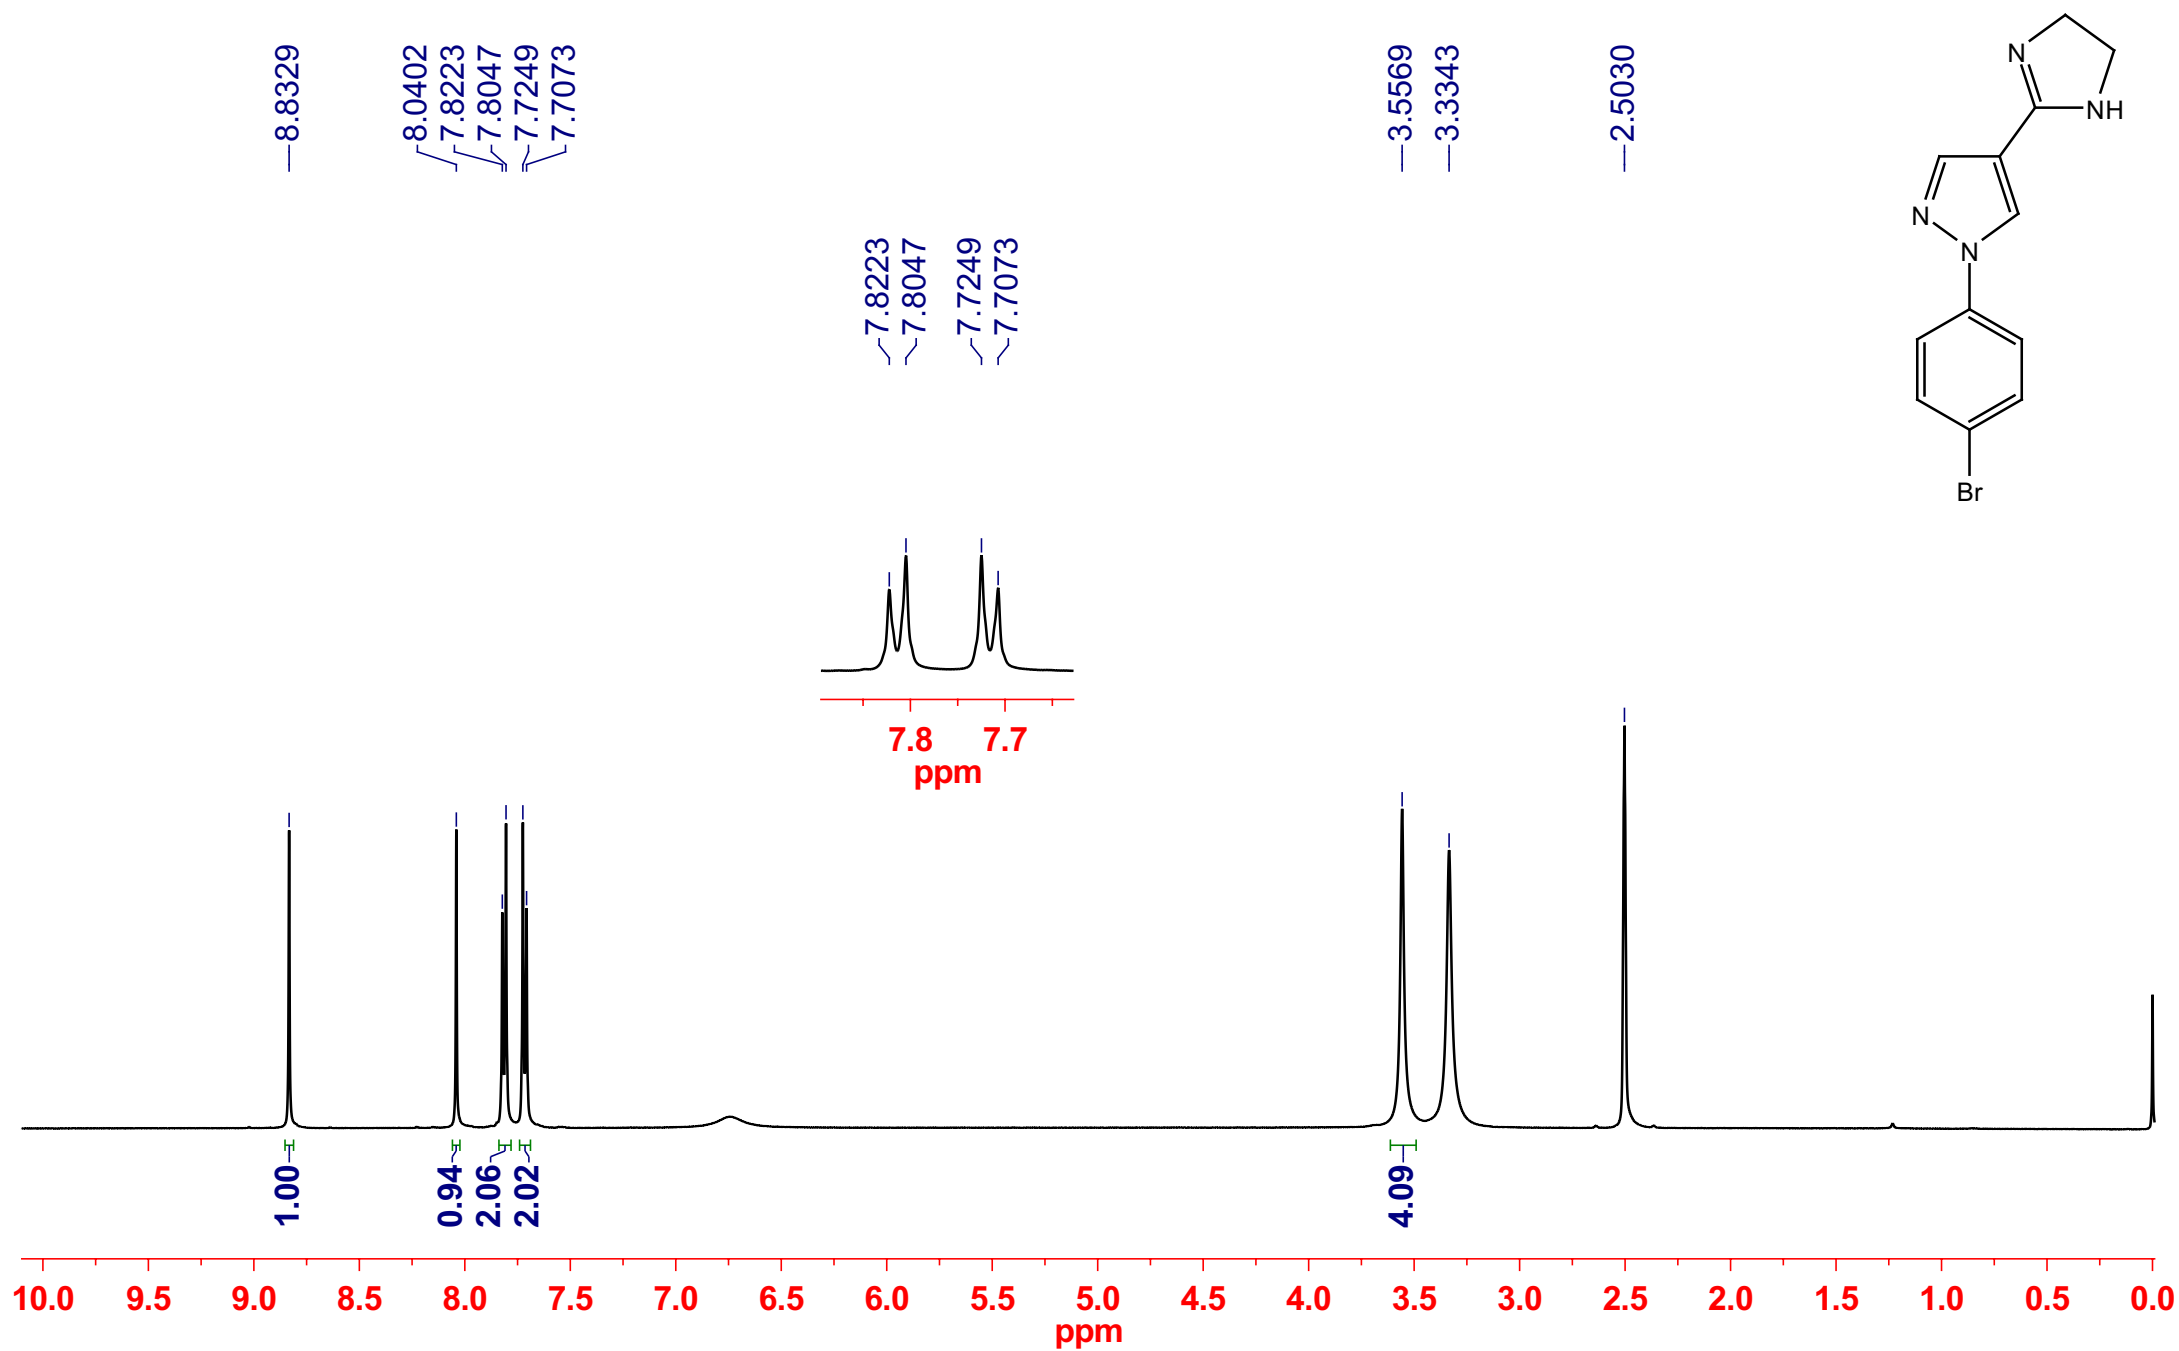

$^{13}\text{C}$  NMR of compound **3j**

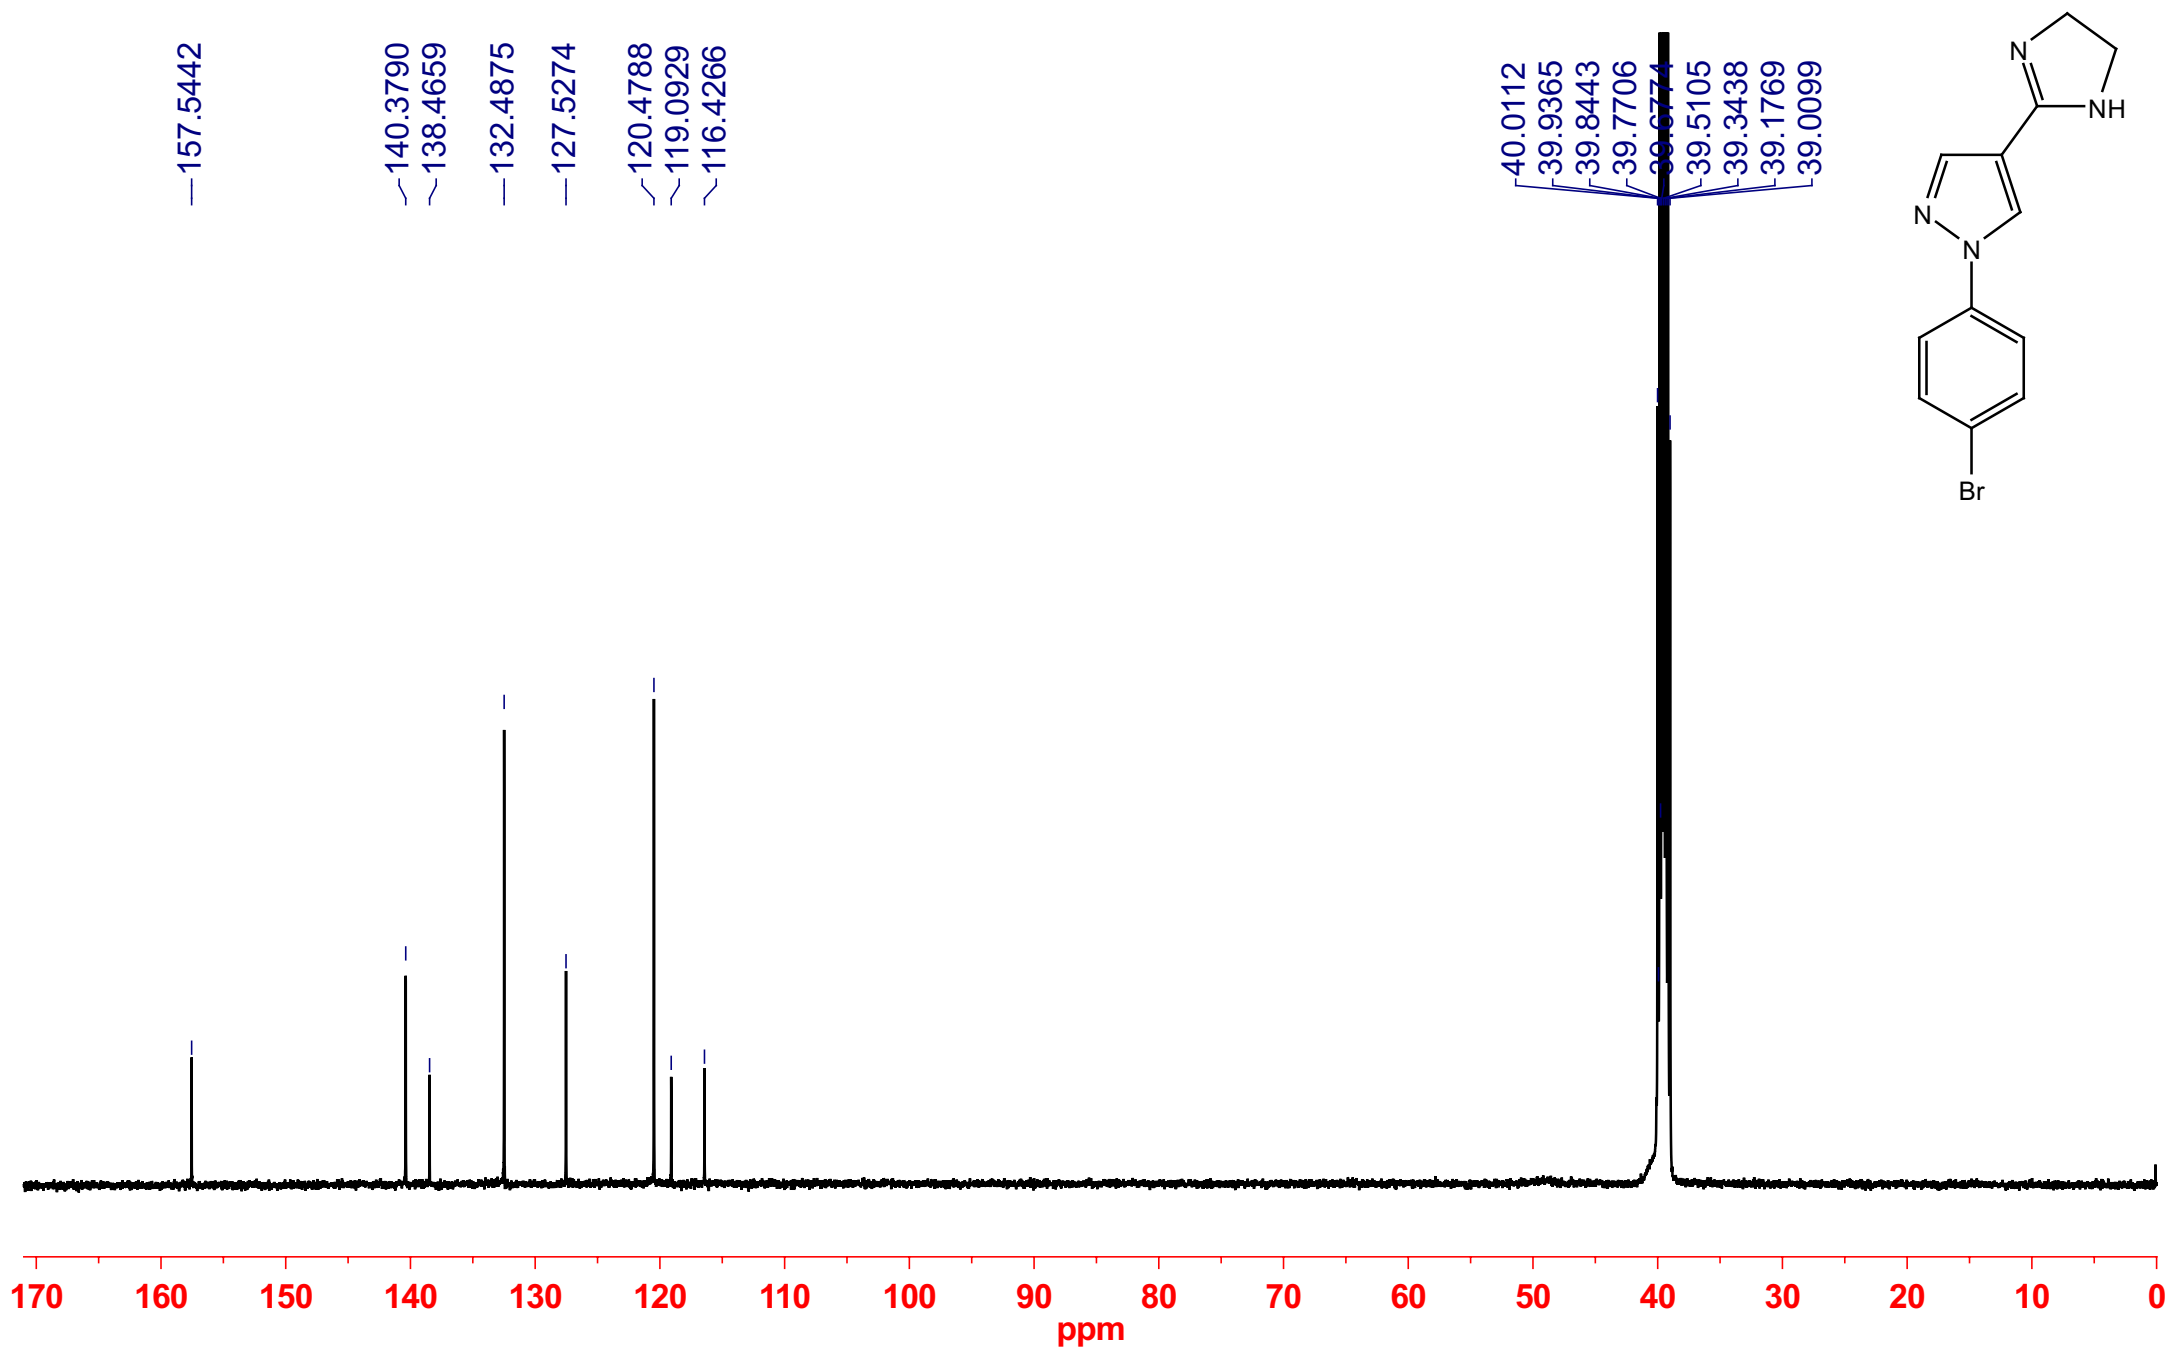



<sup>1</sup>H NMR of compound **3k**

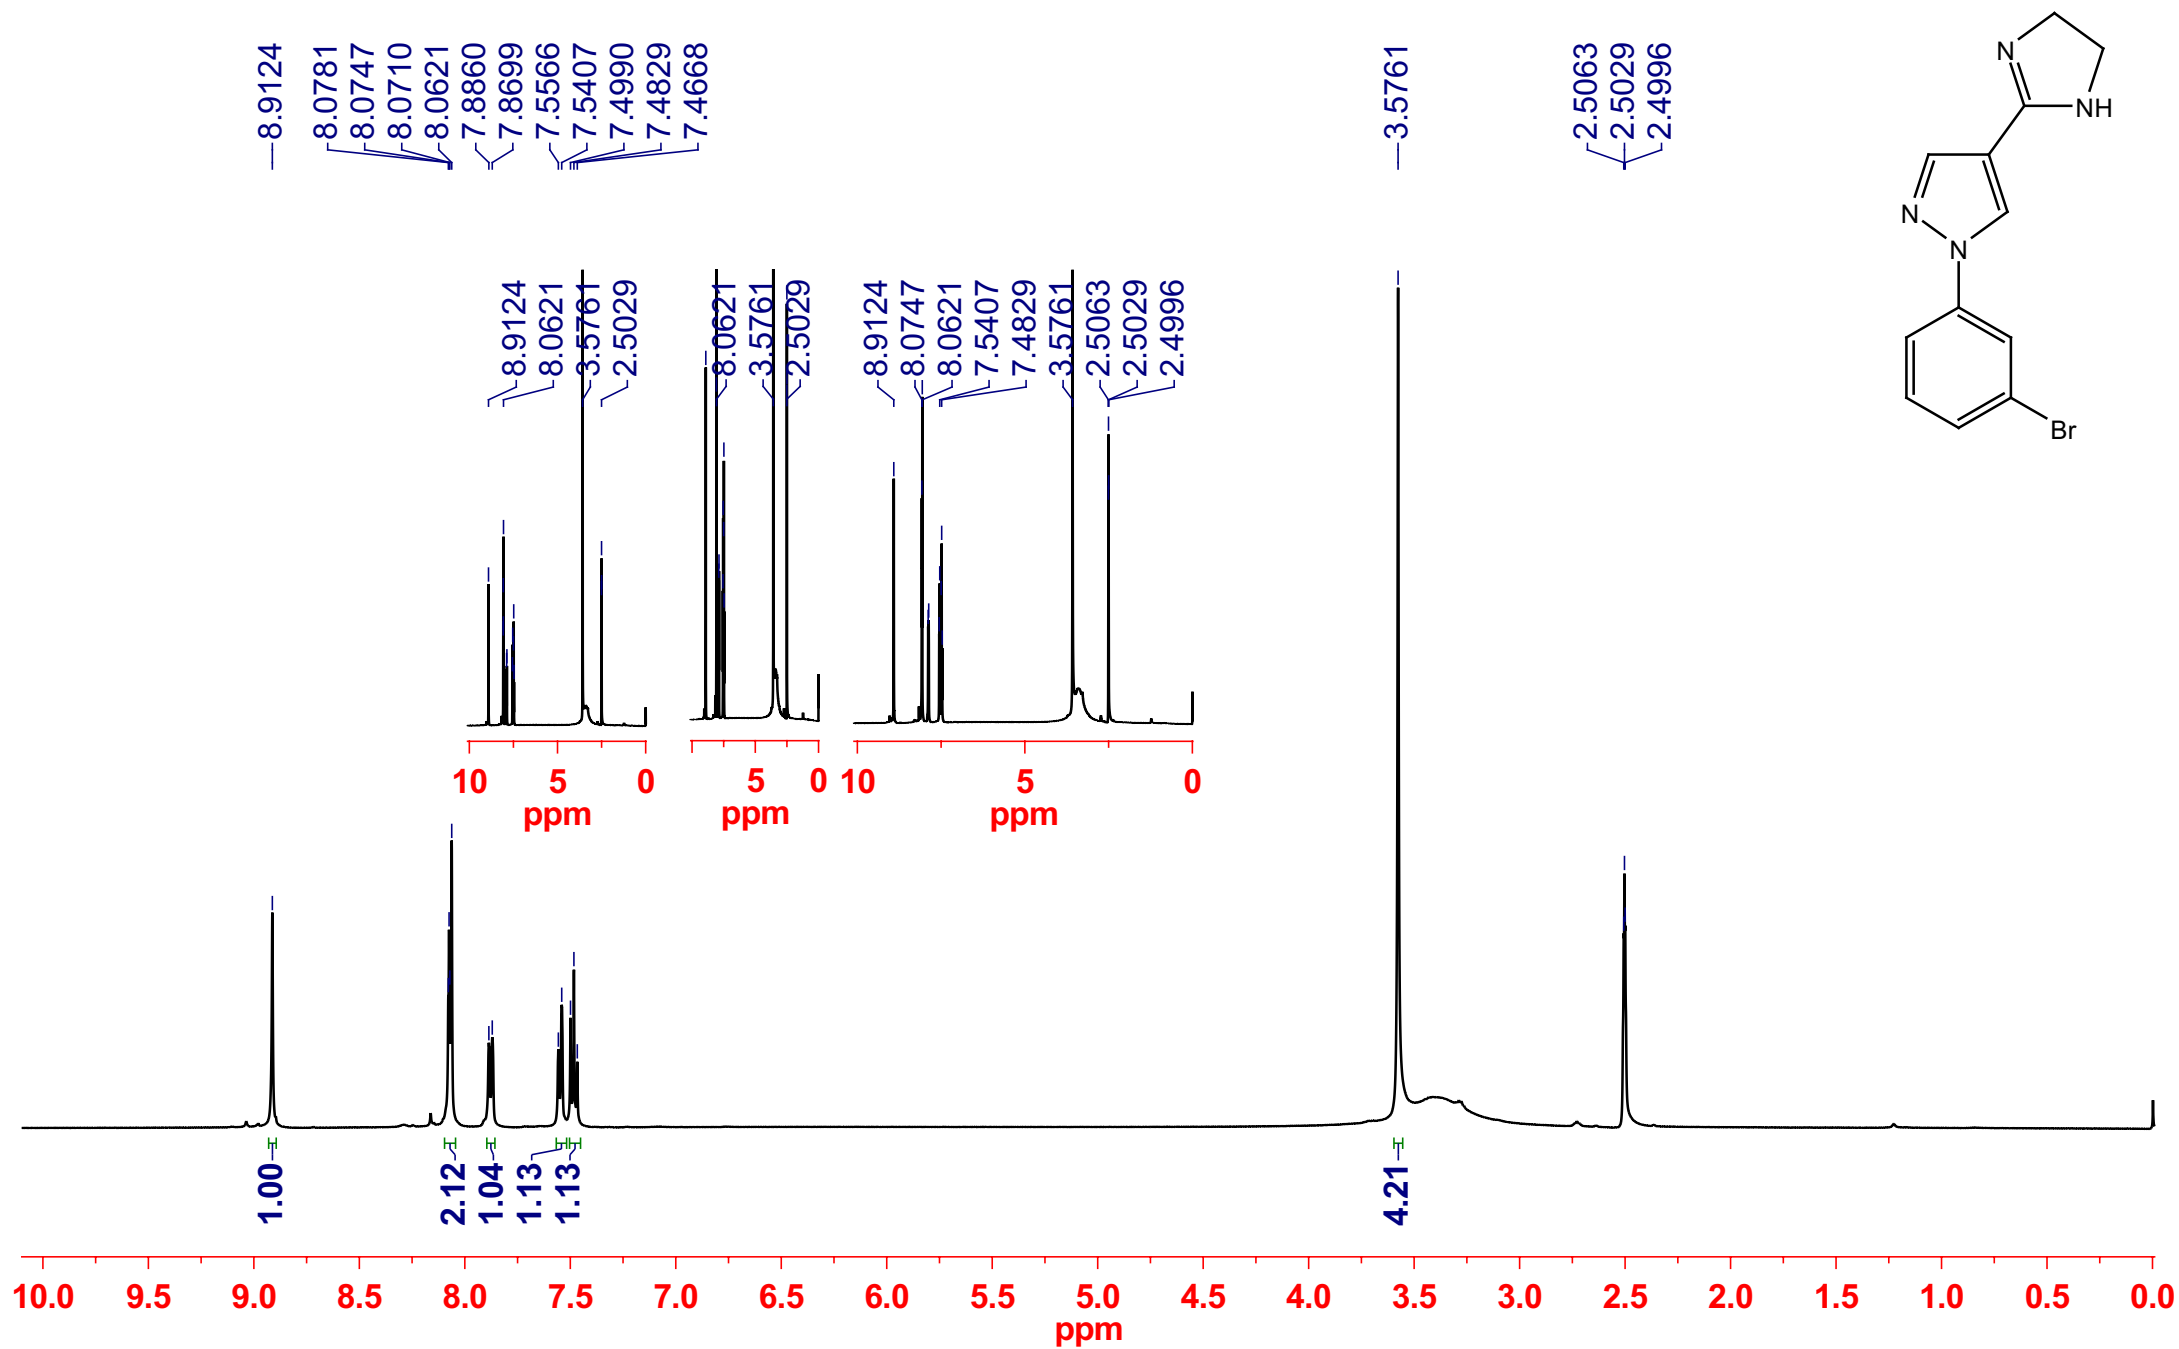

<sup>13</sup>C NMR of compound **3k**

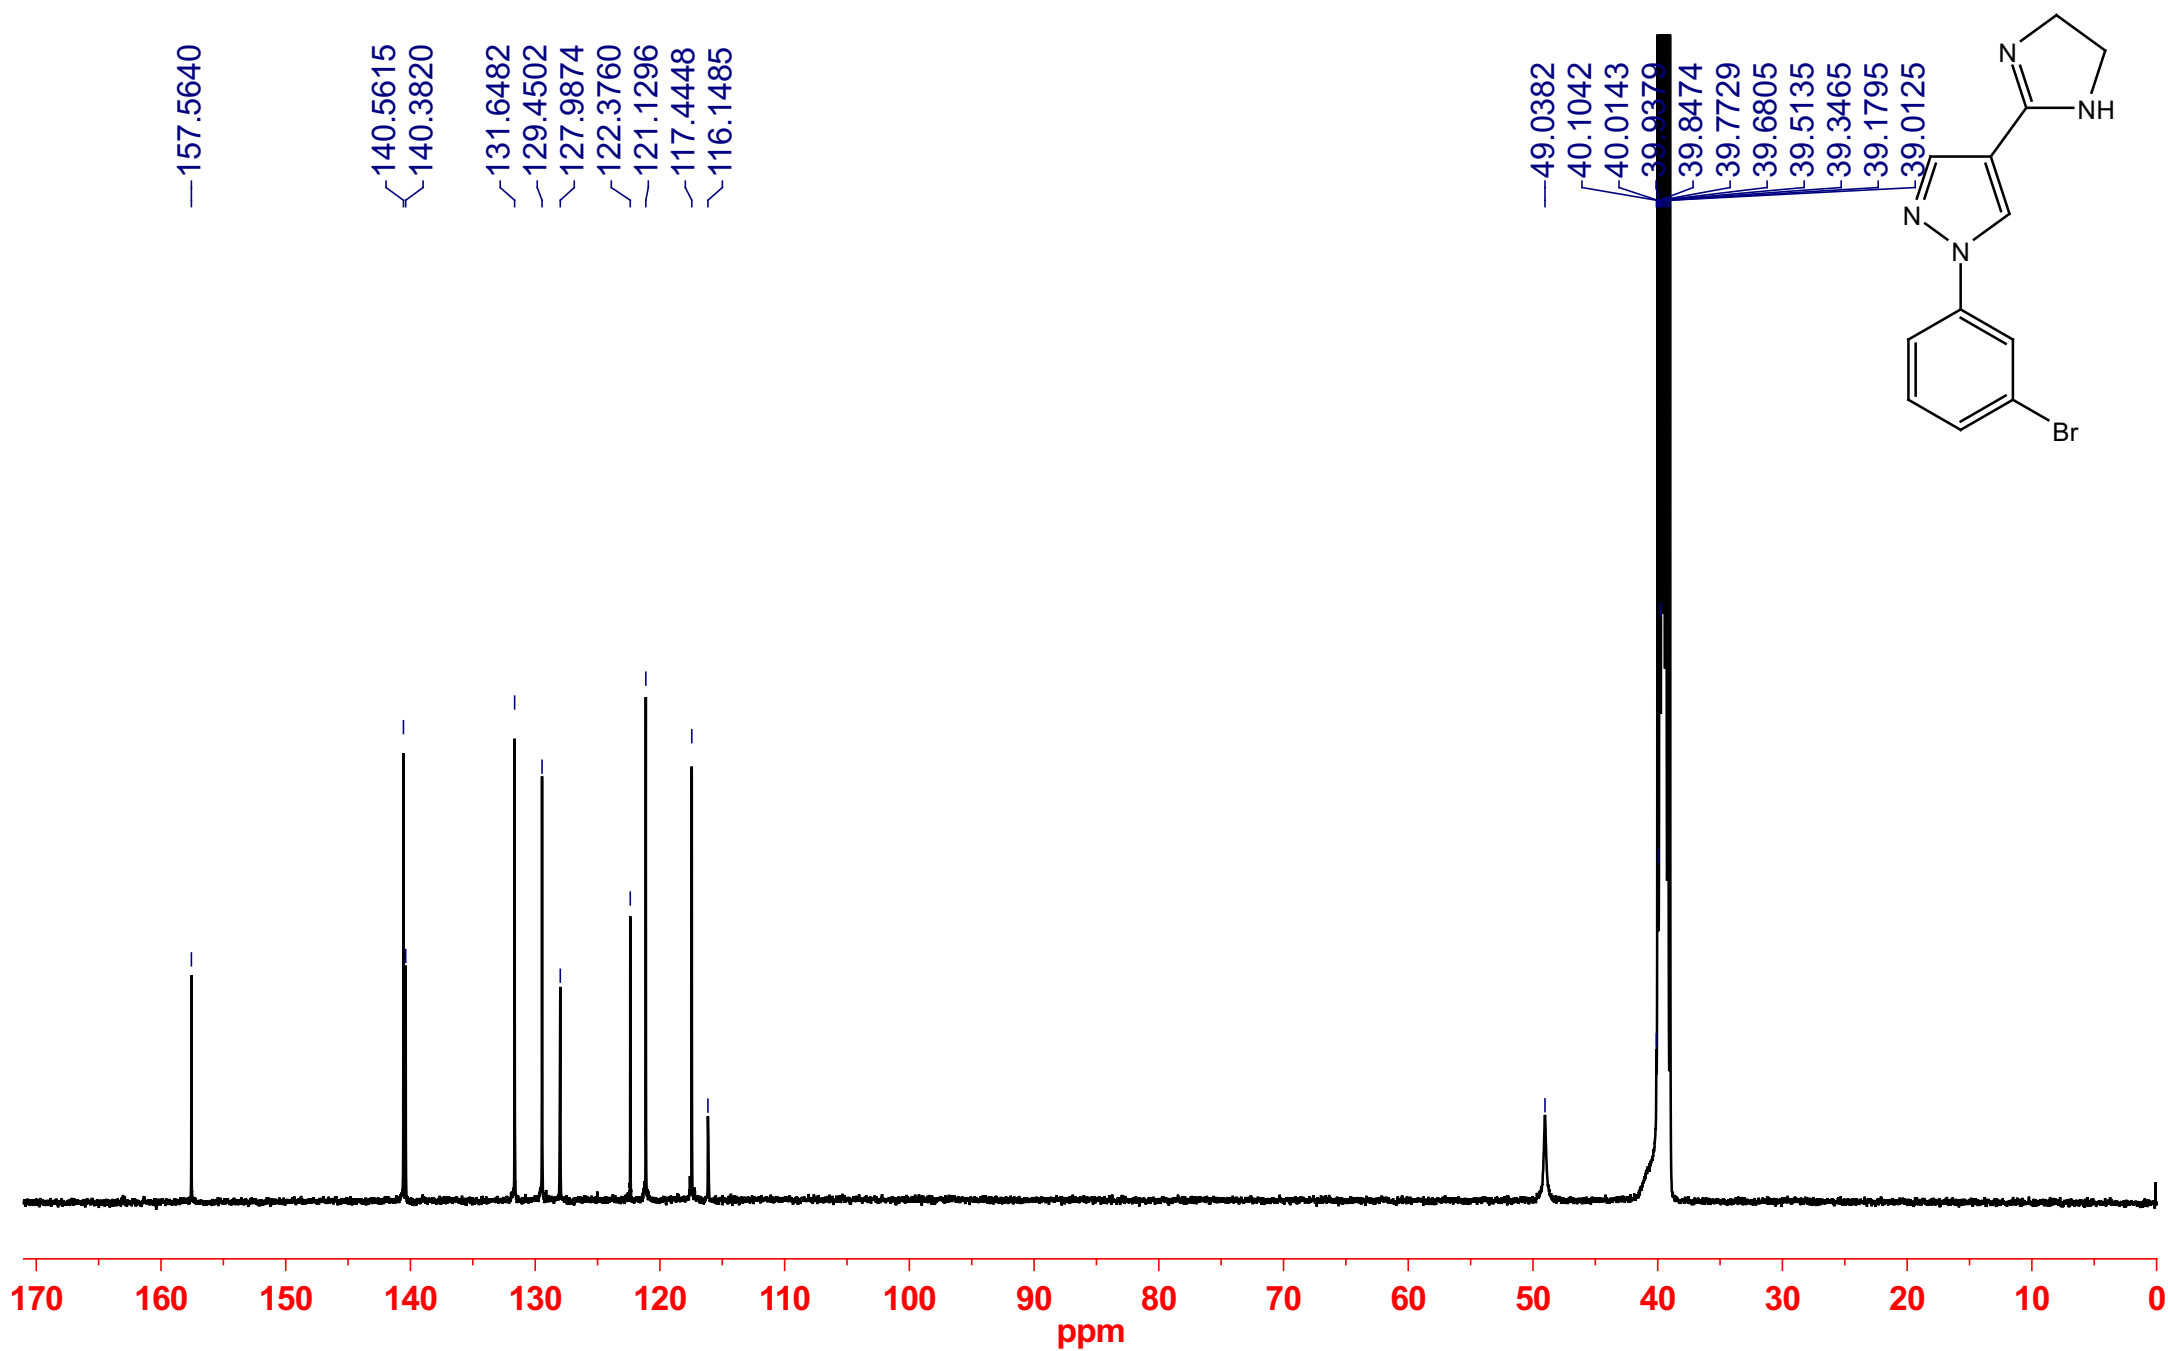

<sup>1</sup>H NMR of compound **3l**

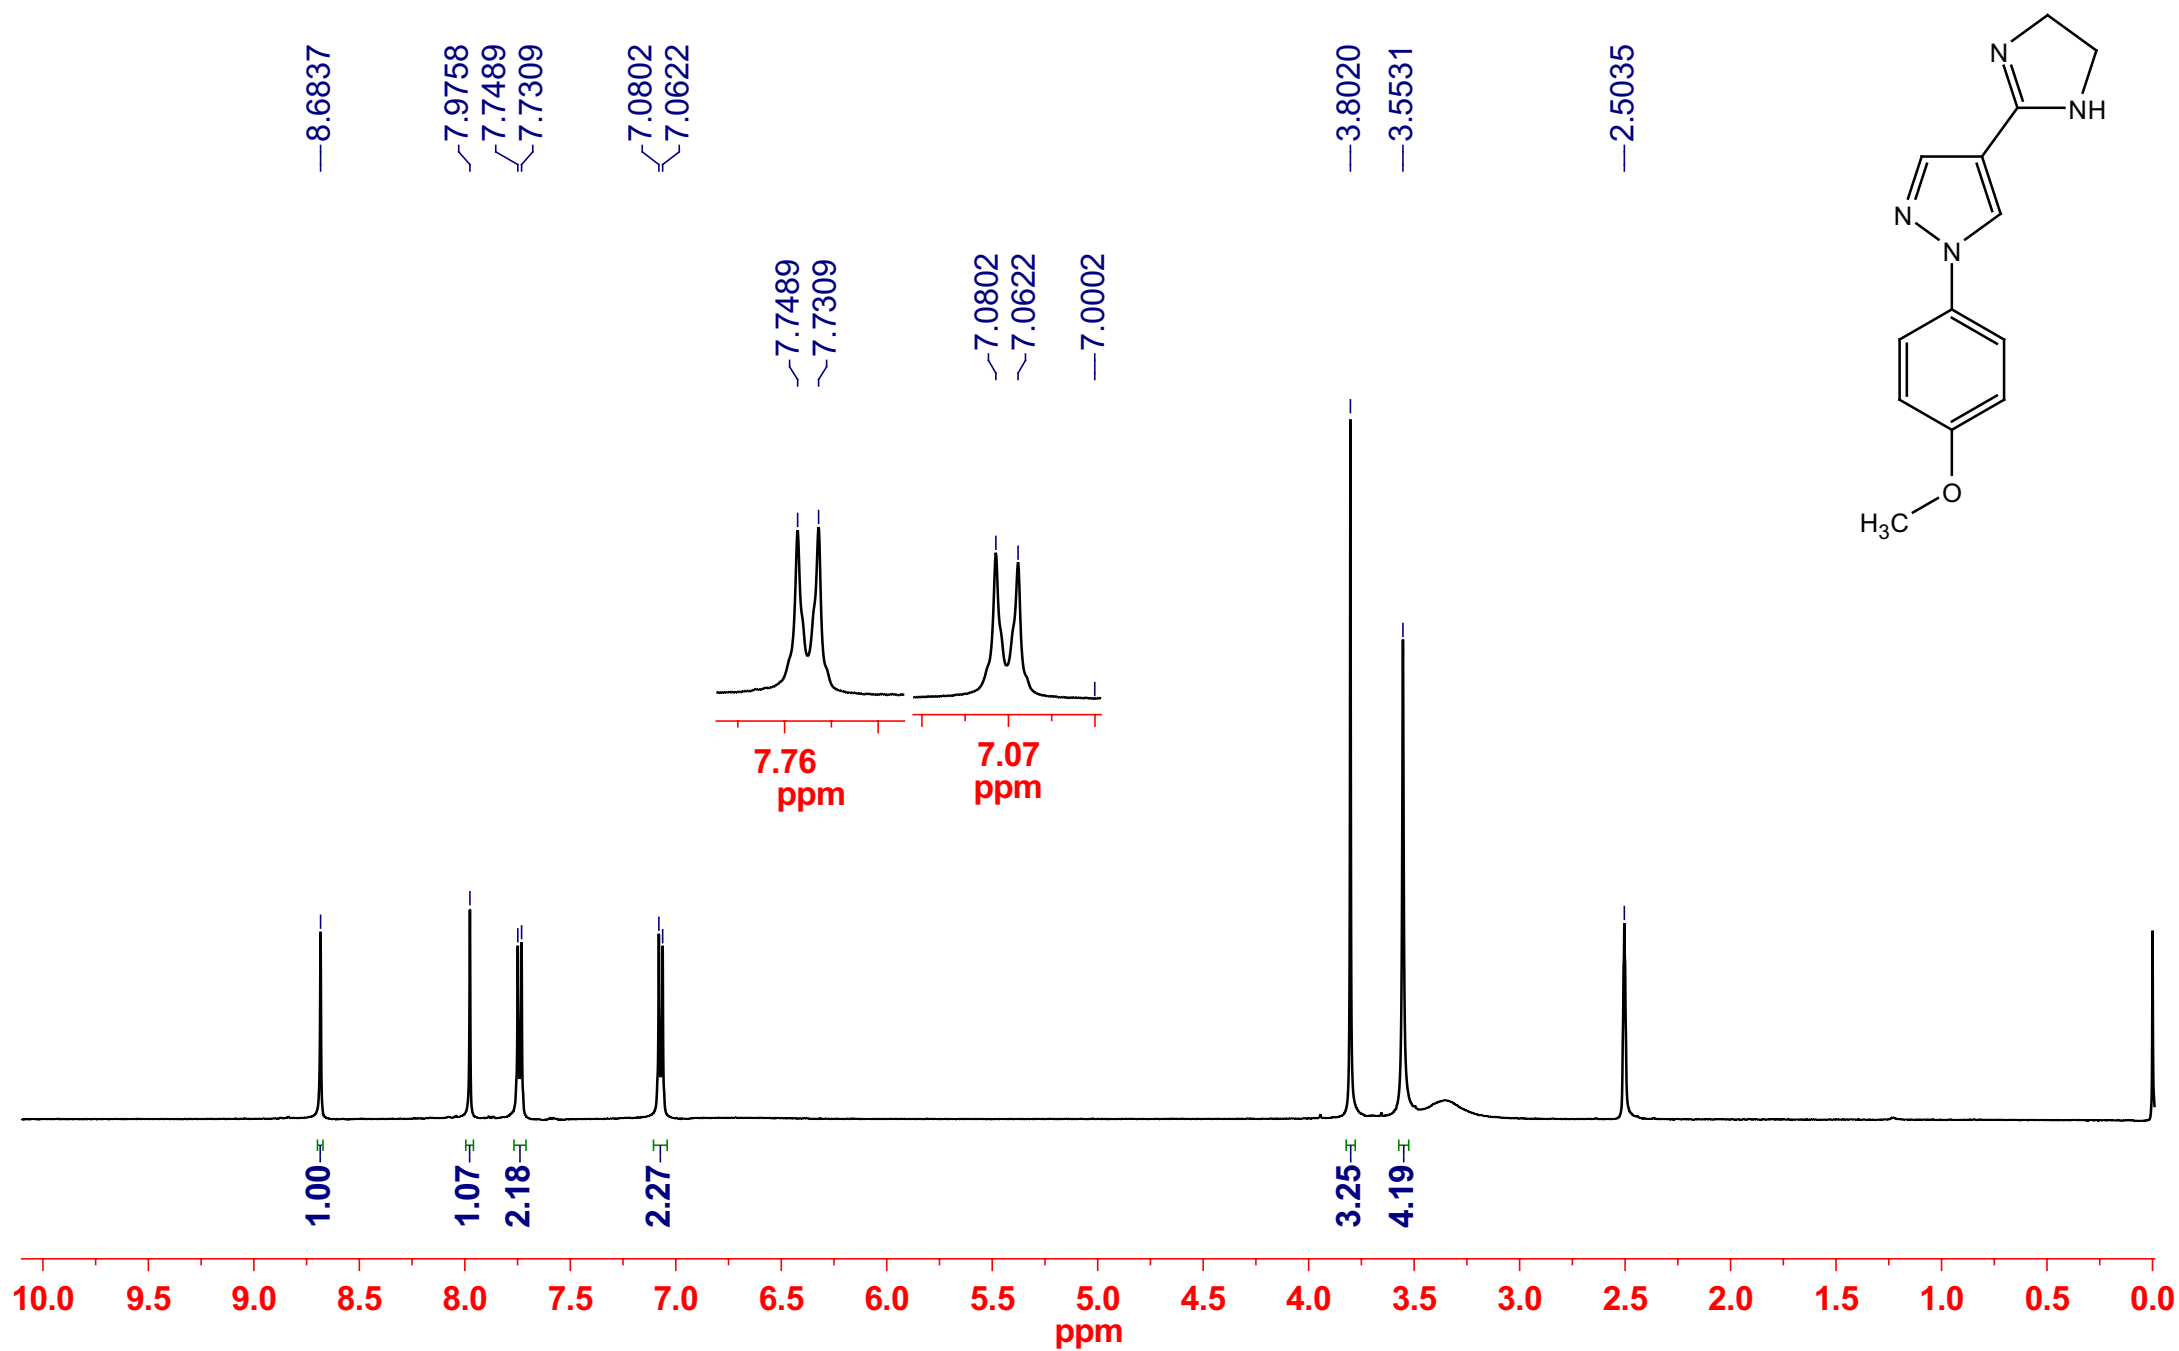

<sup>13</sup>C NMR of compound **3I**

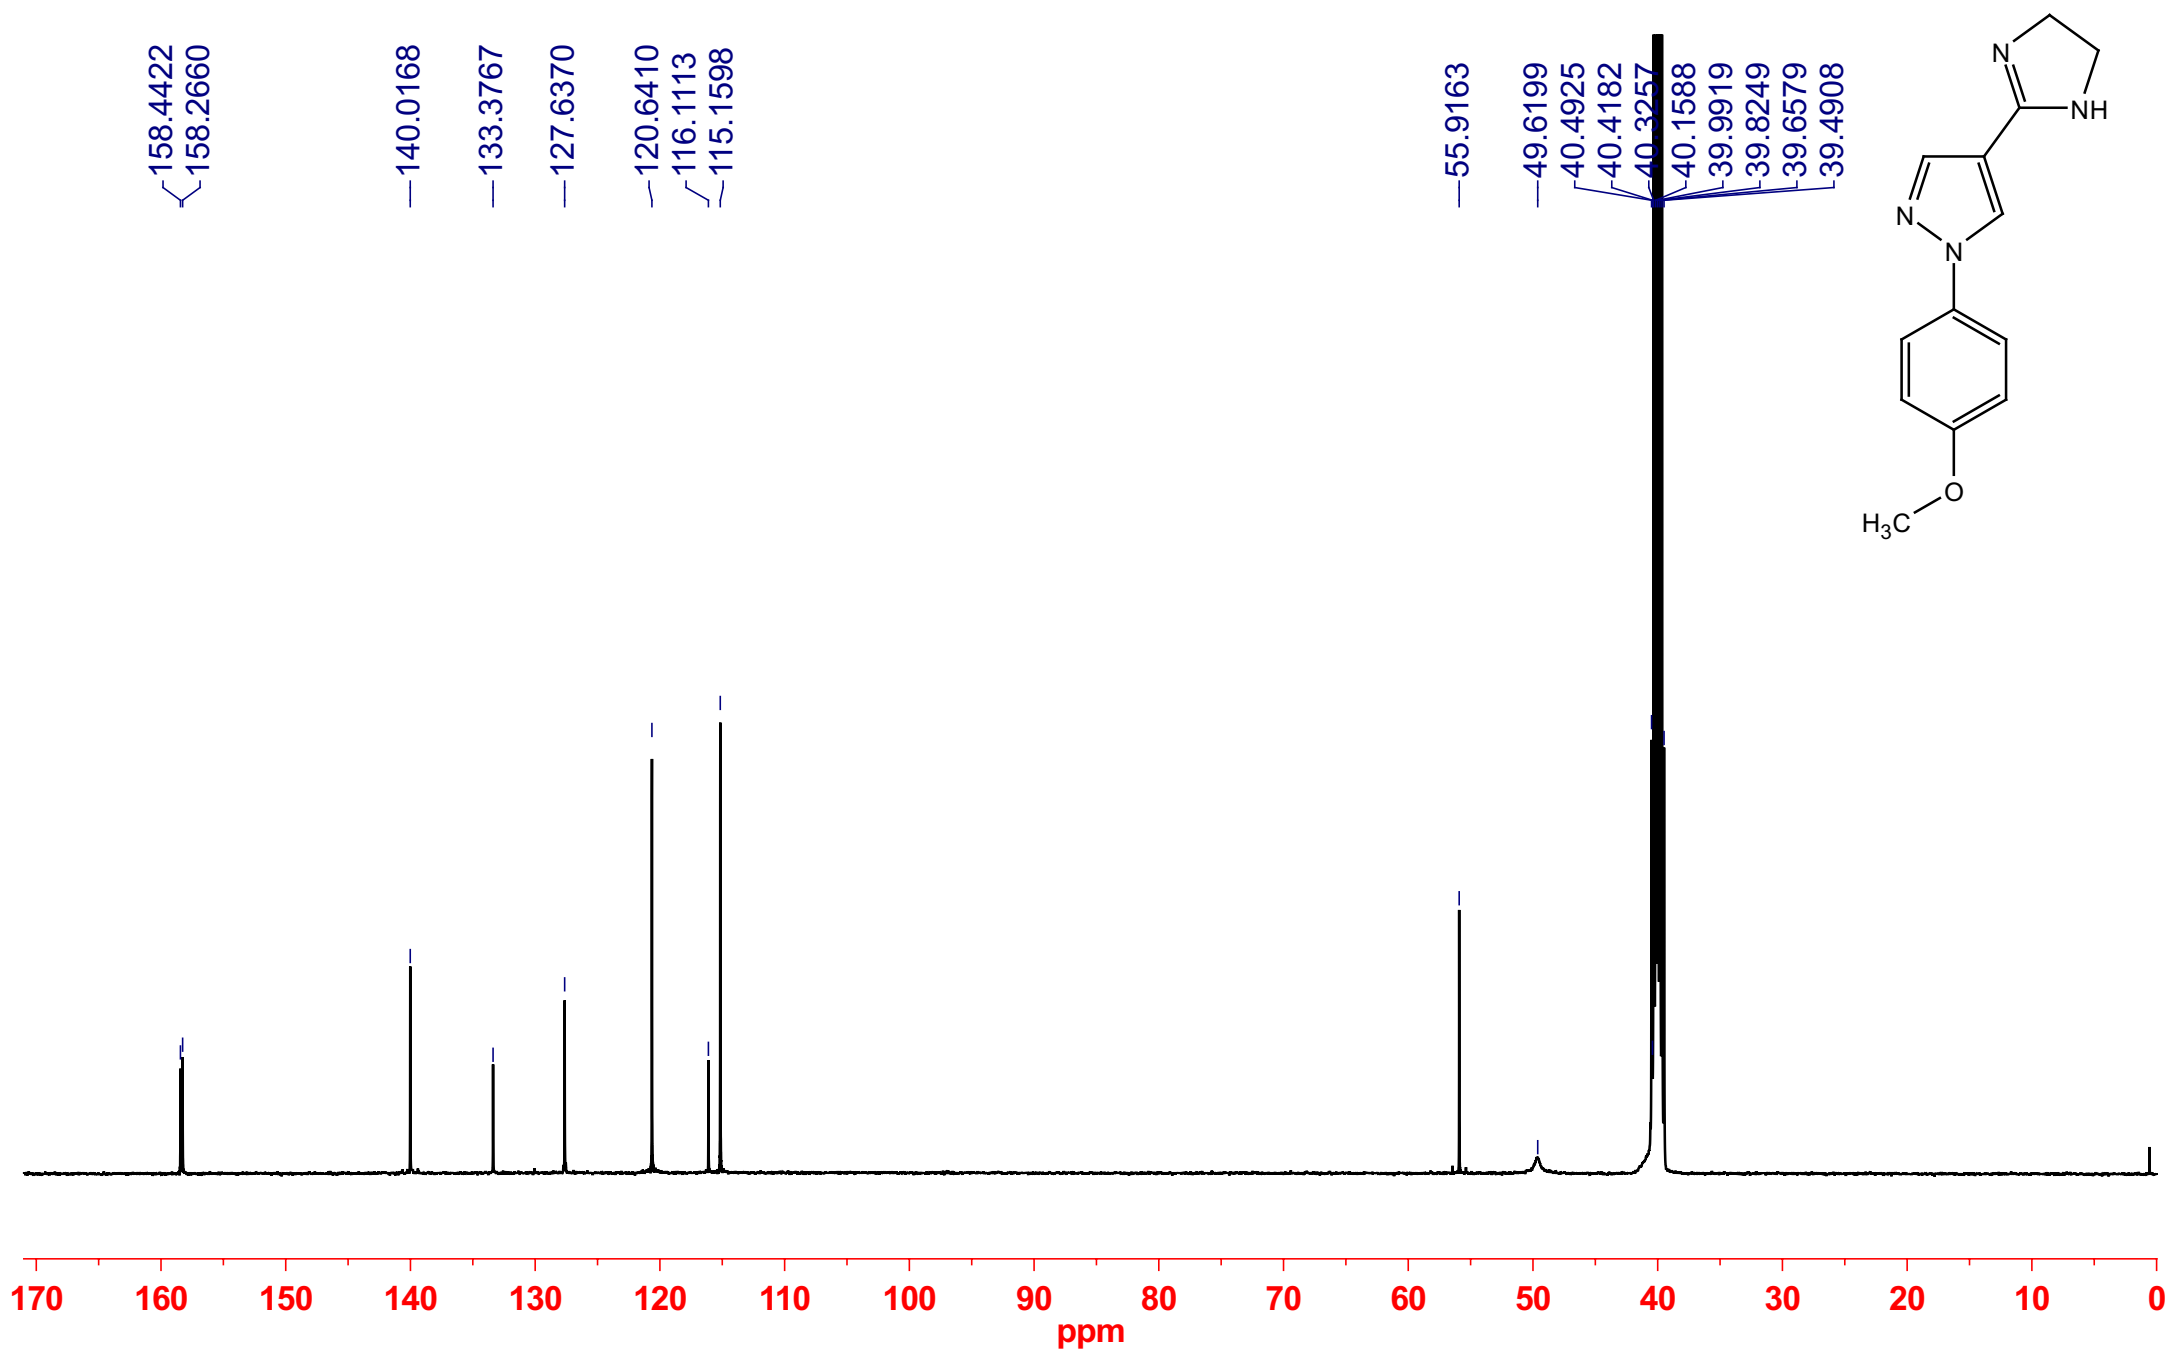

<sup>1</sup>H NMR of compound **3m**

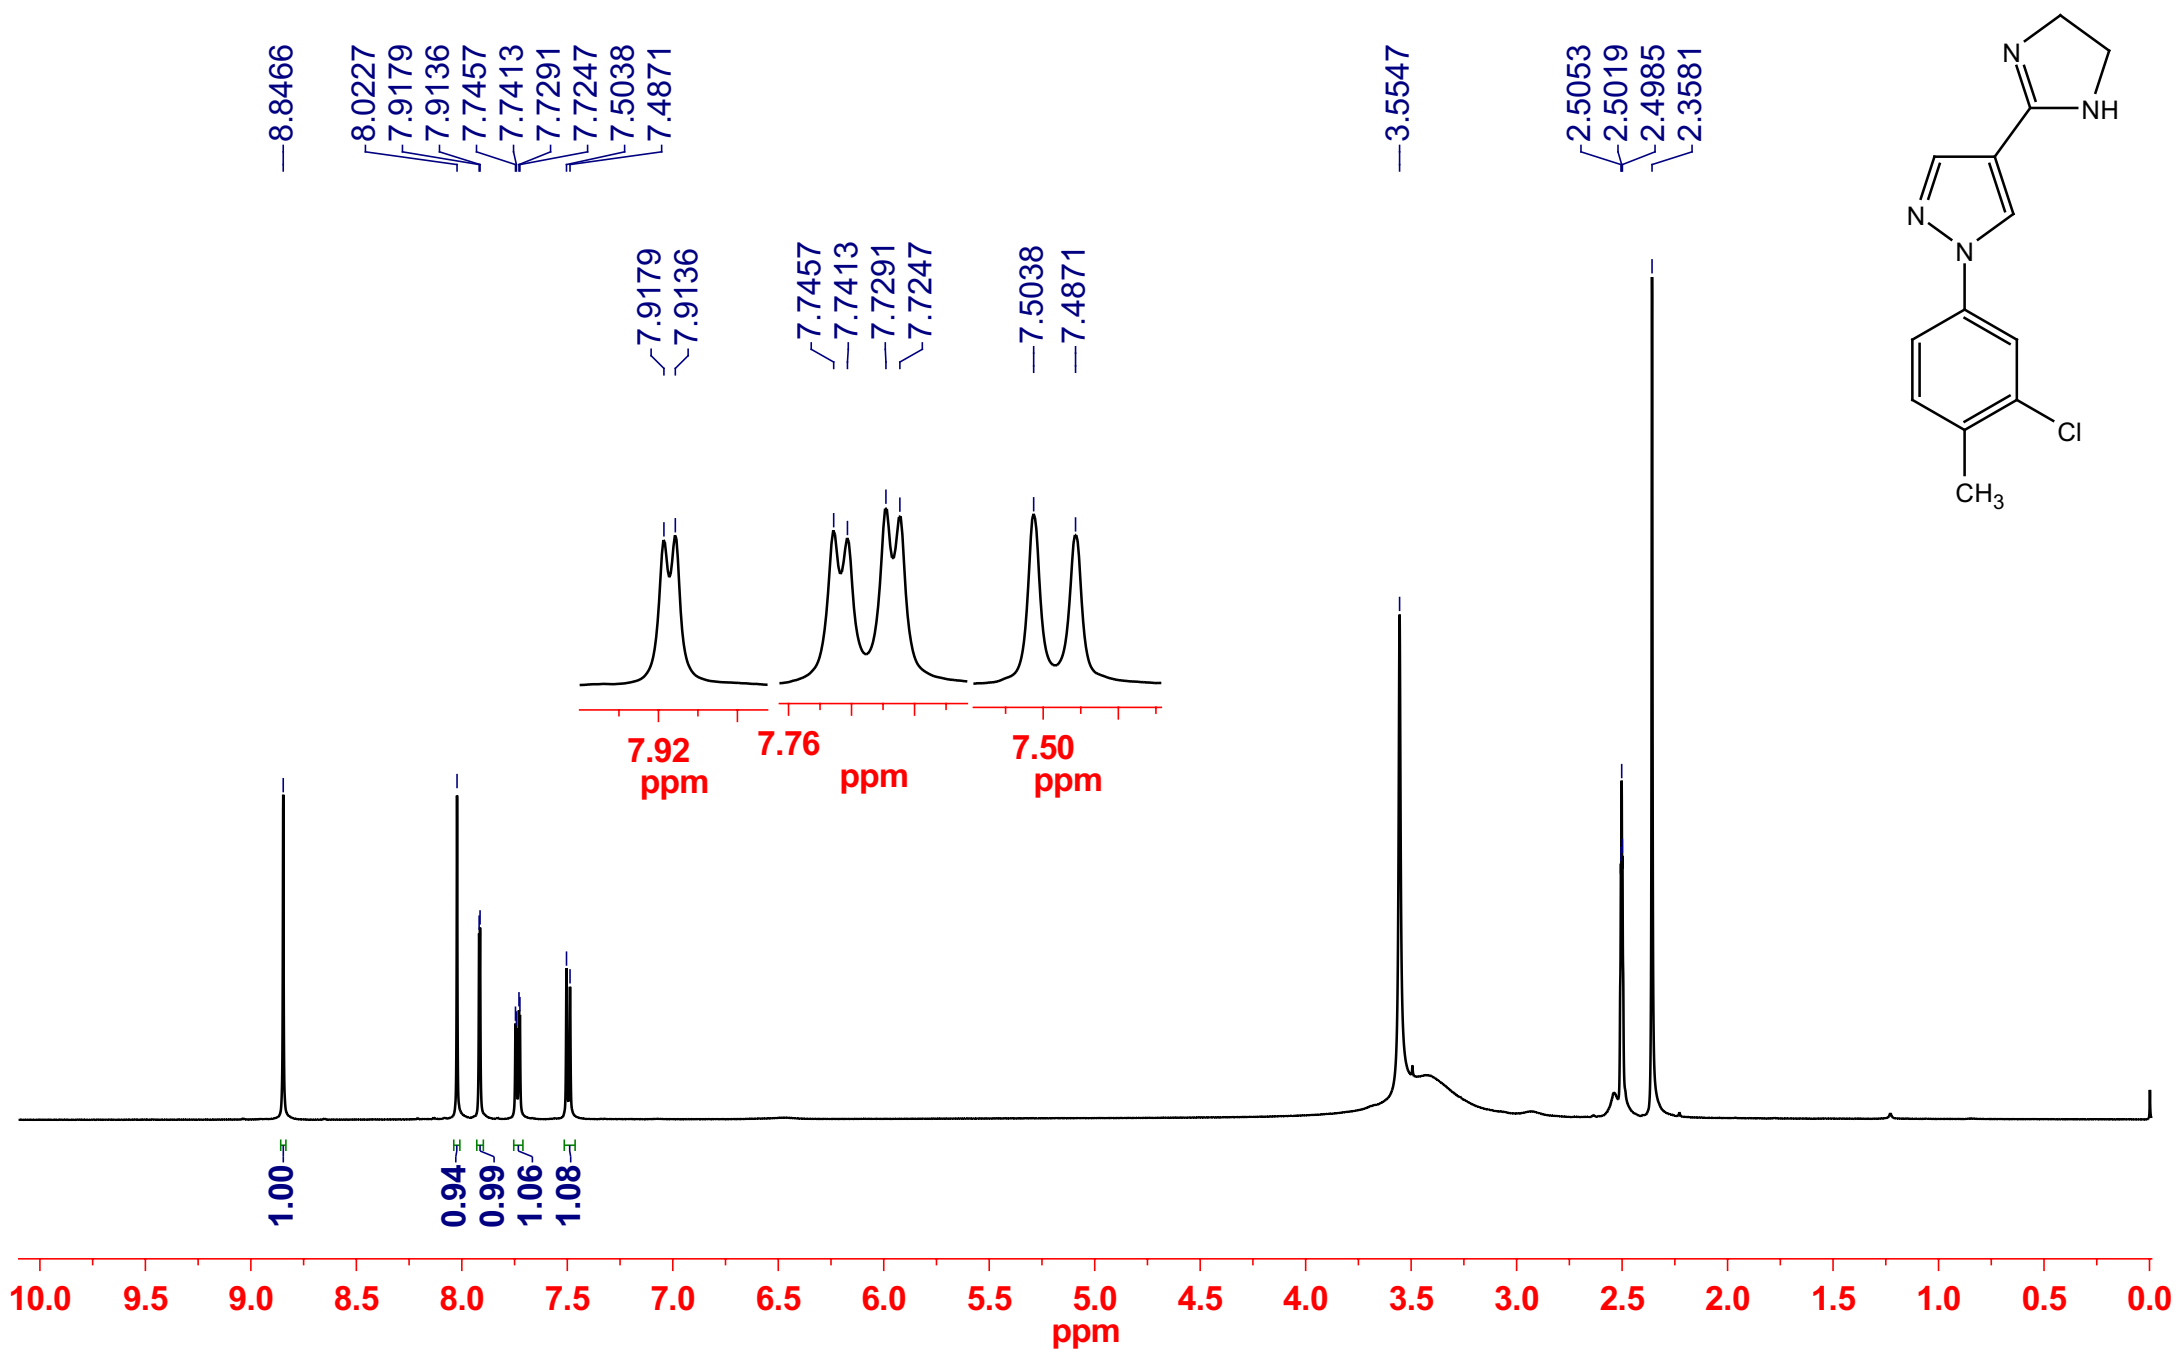

<sup>13</sup>C NMR of compound **3m**

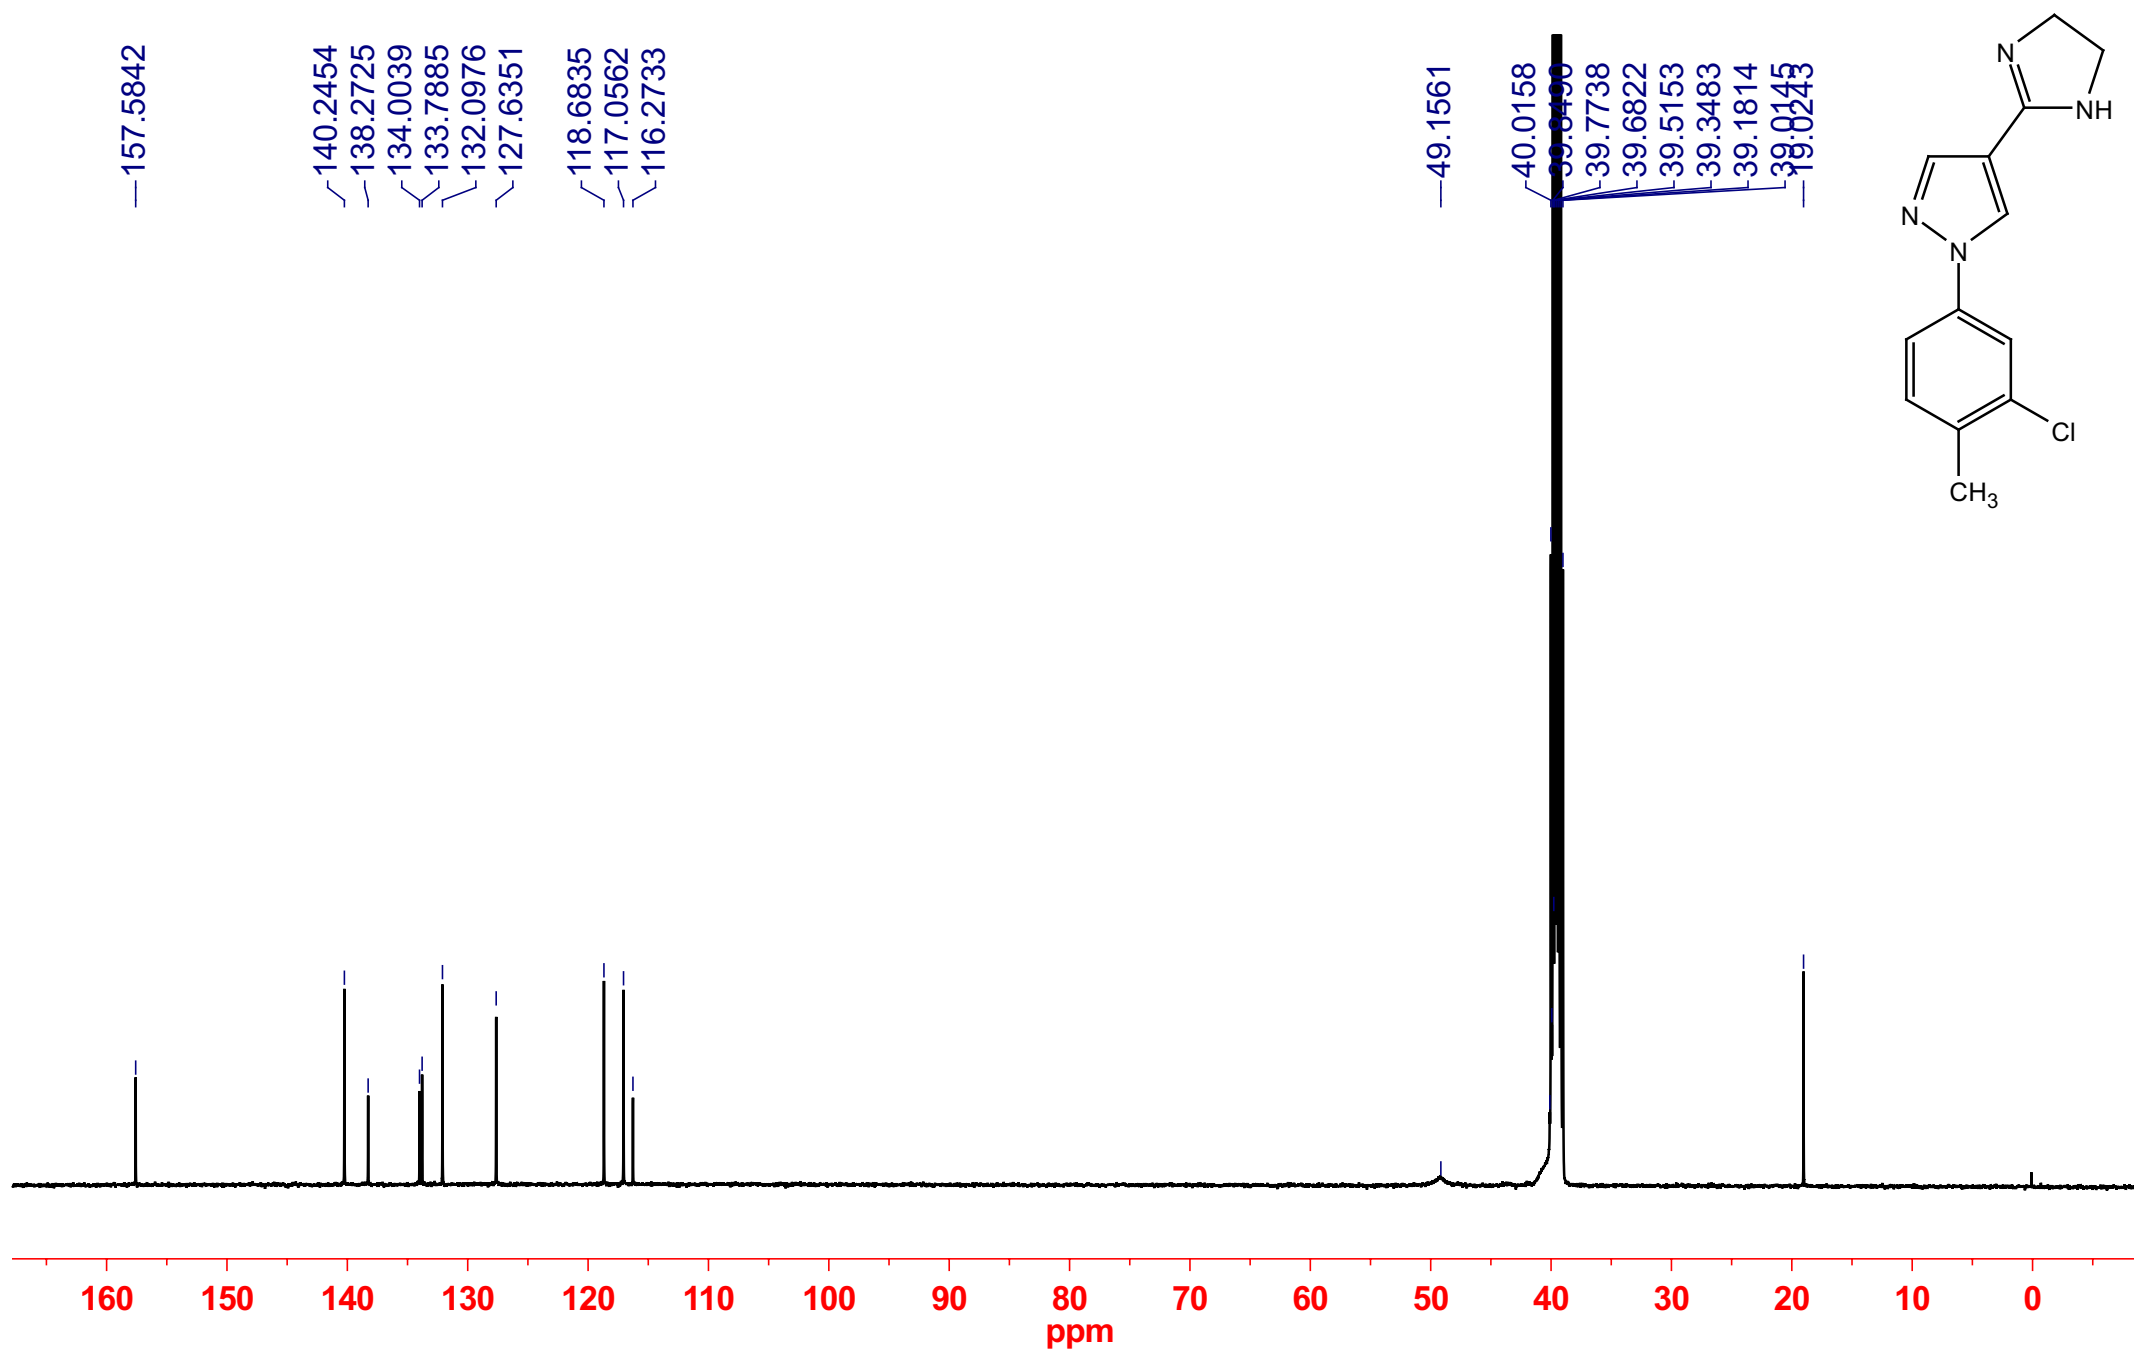

<sup>1</sup>H NMR of compound **3n**

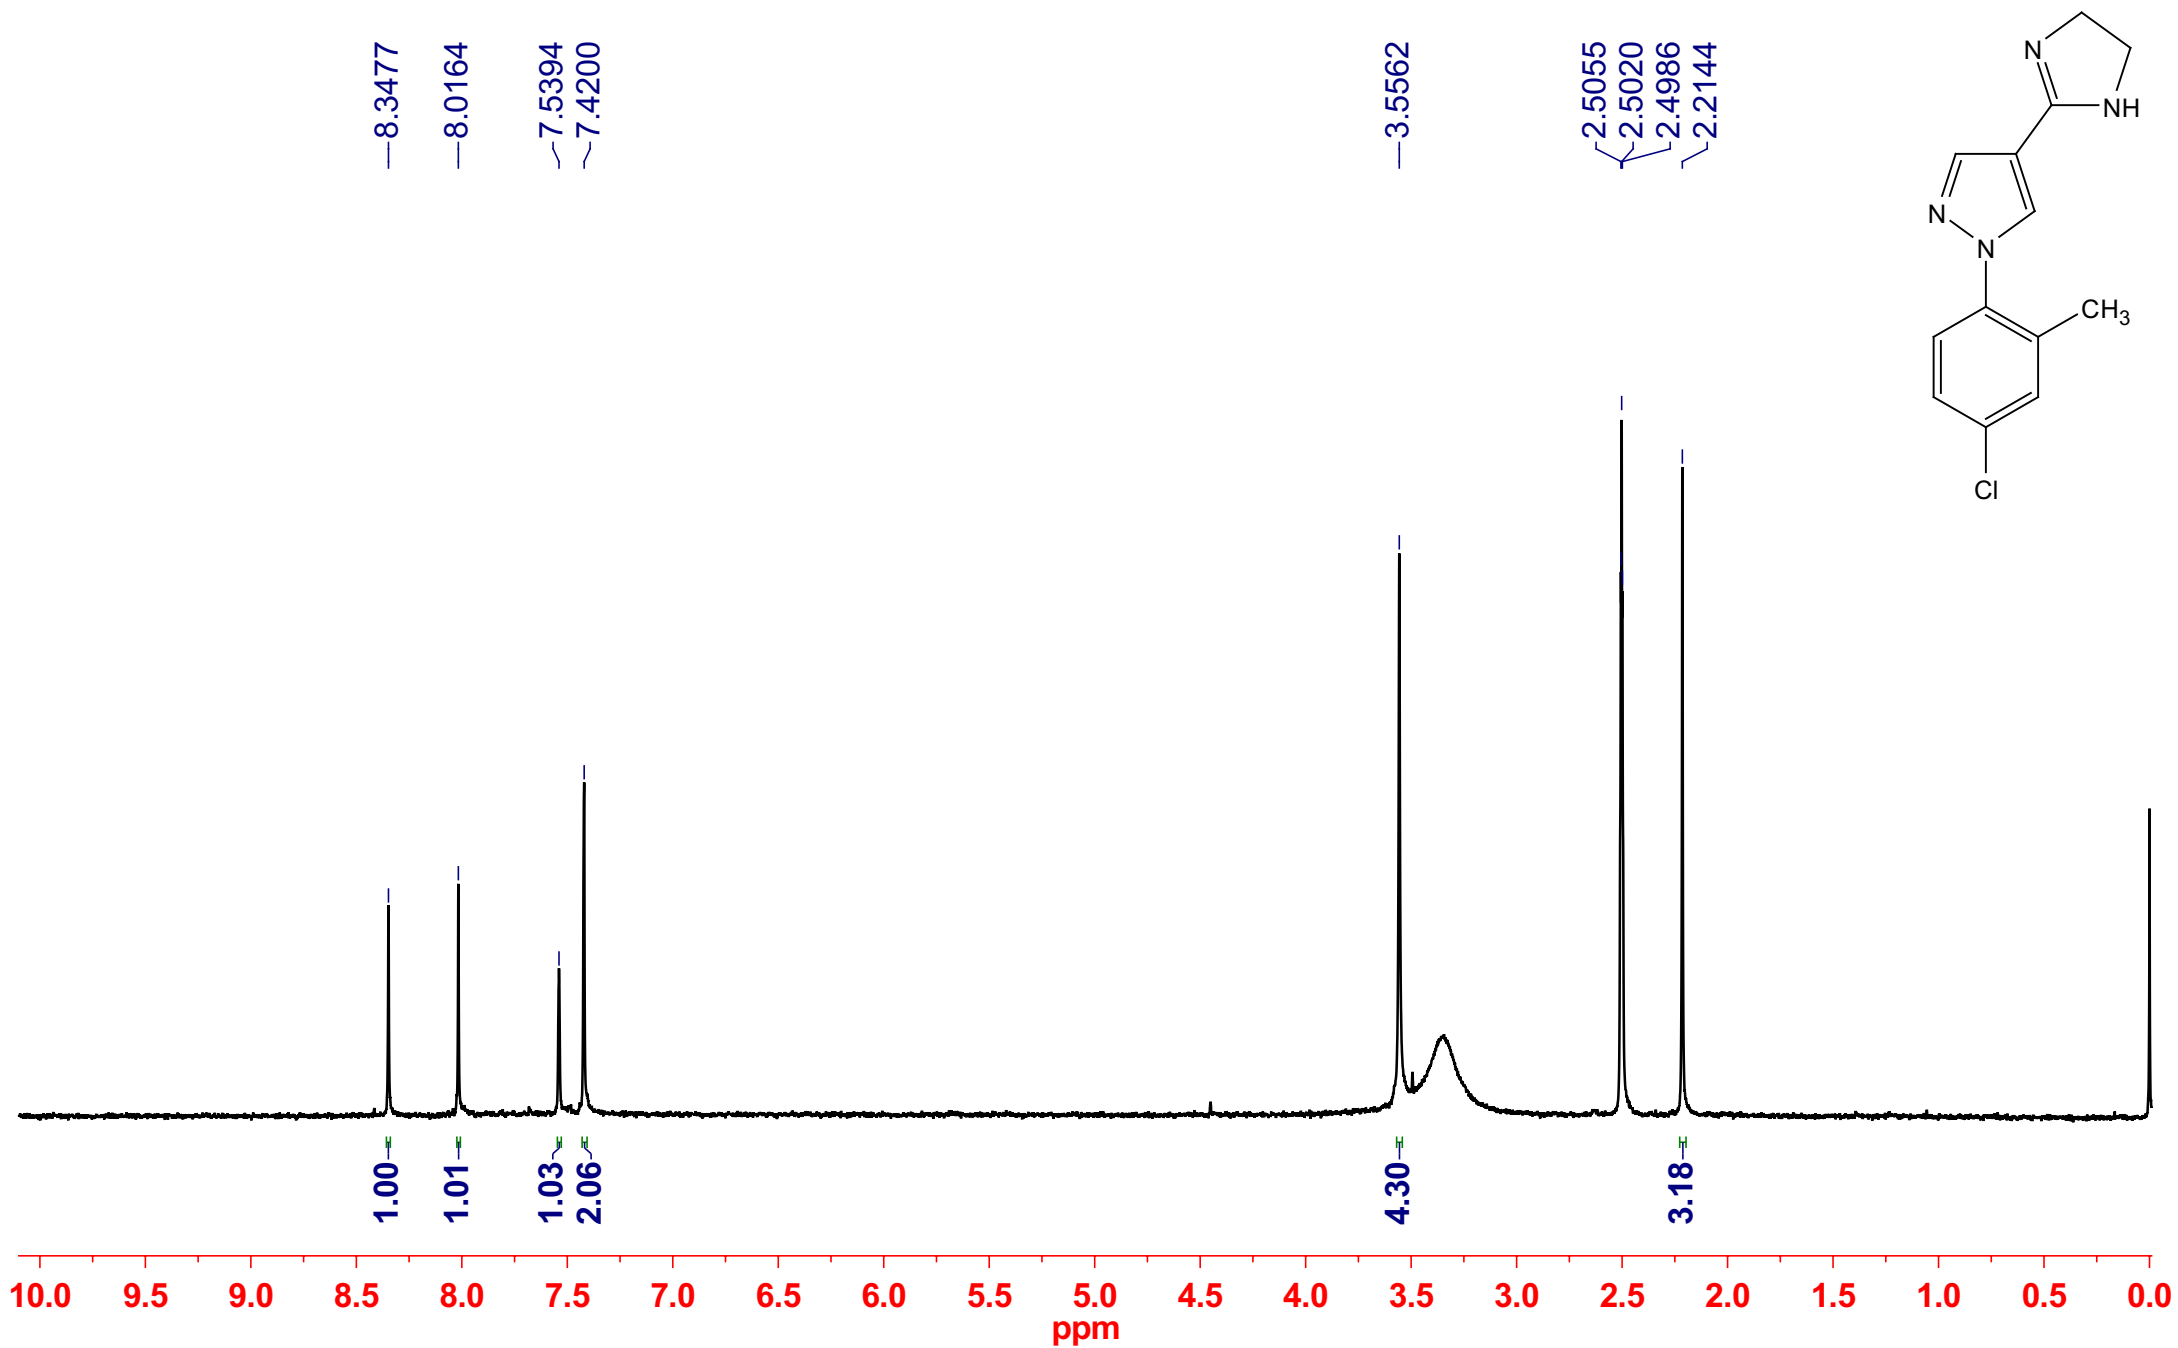

<sup>13</sup>C NMR of compound **3n**

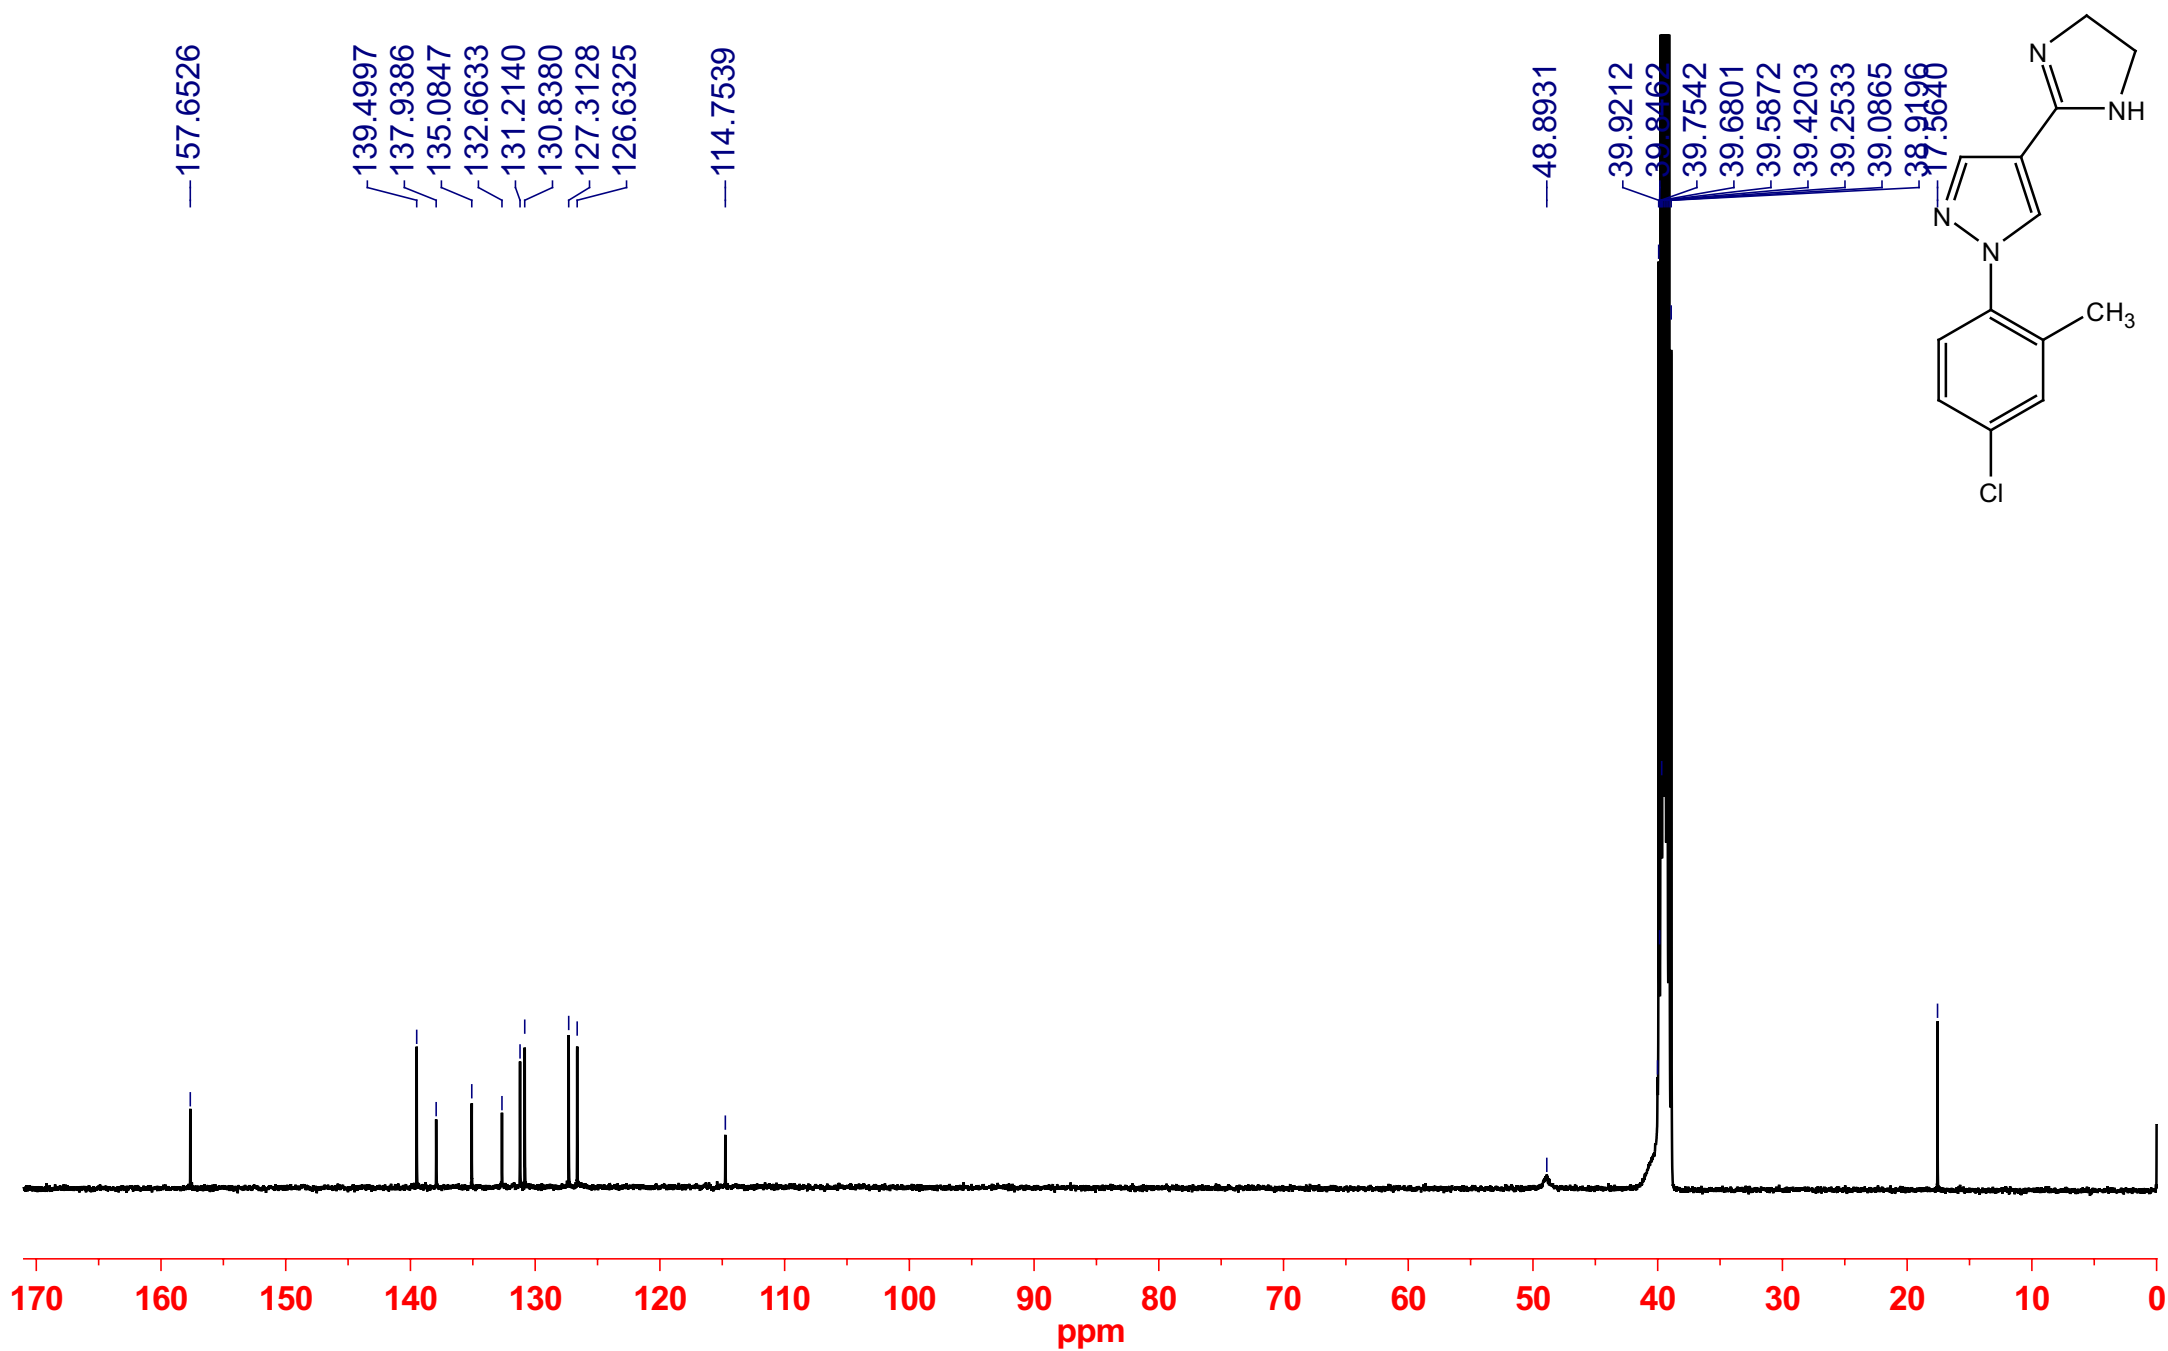



<sup>1</sup>H NMR of compound **4a**

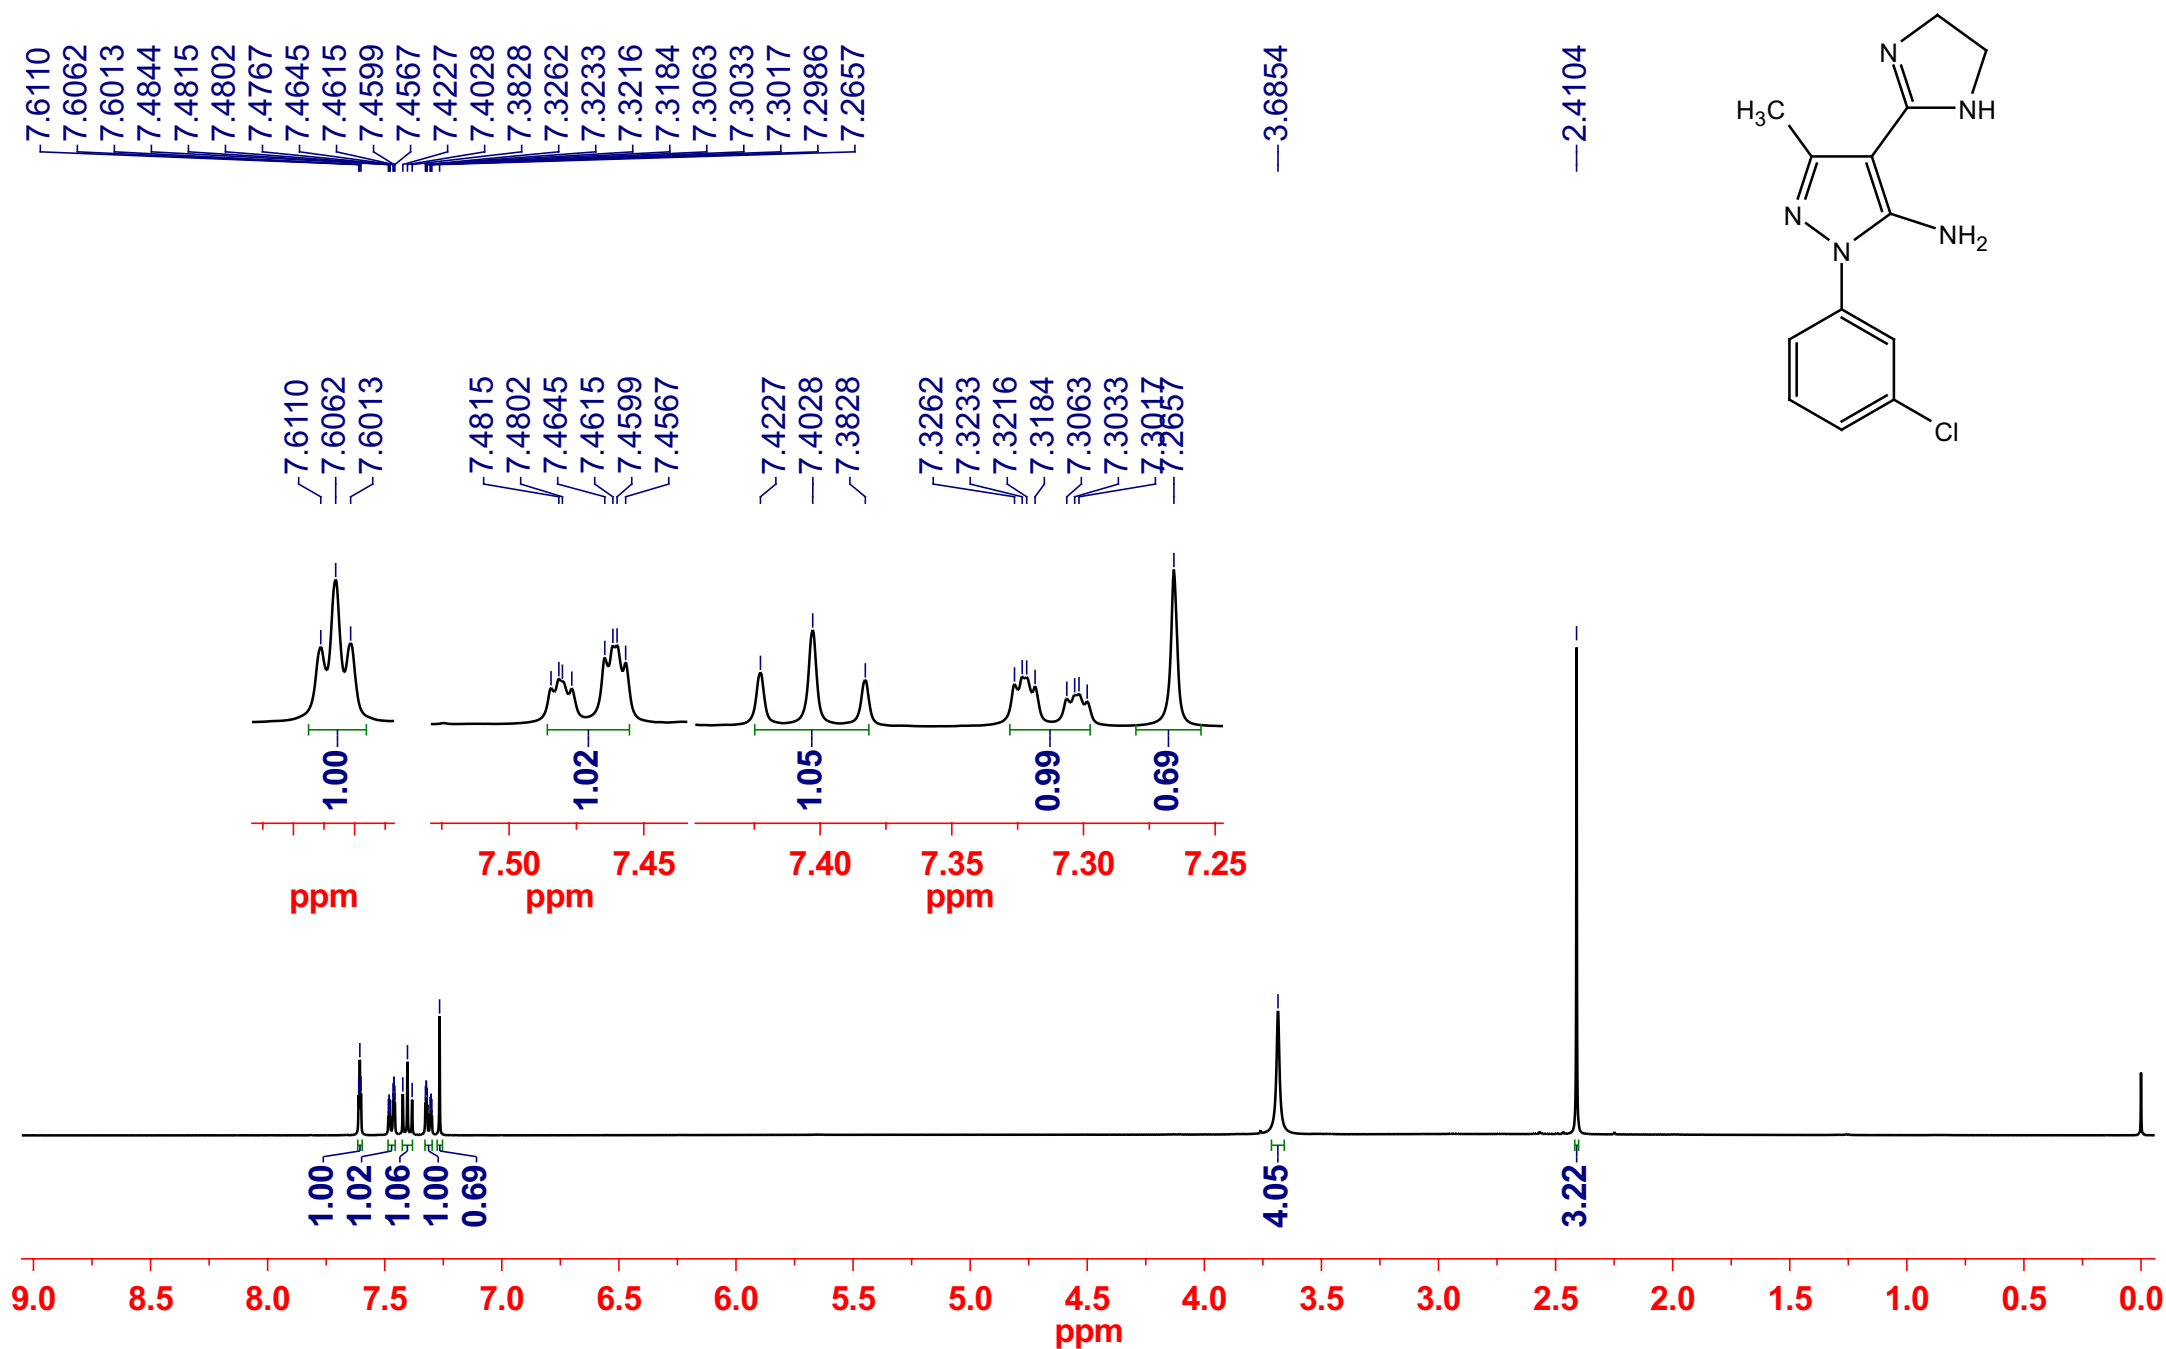

<sup>13</sup>C NMR of compound 4a

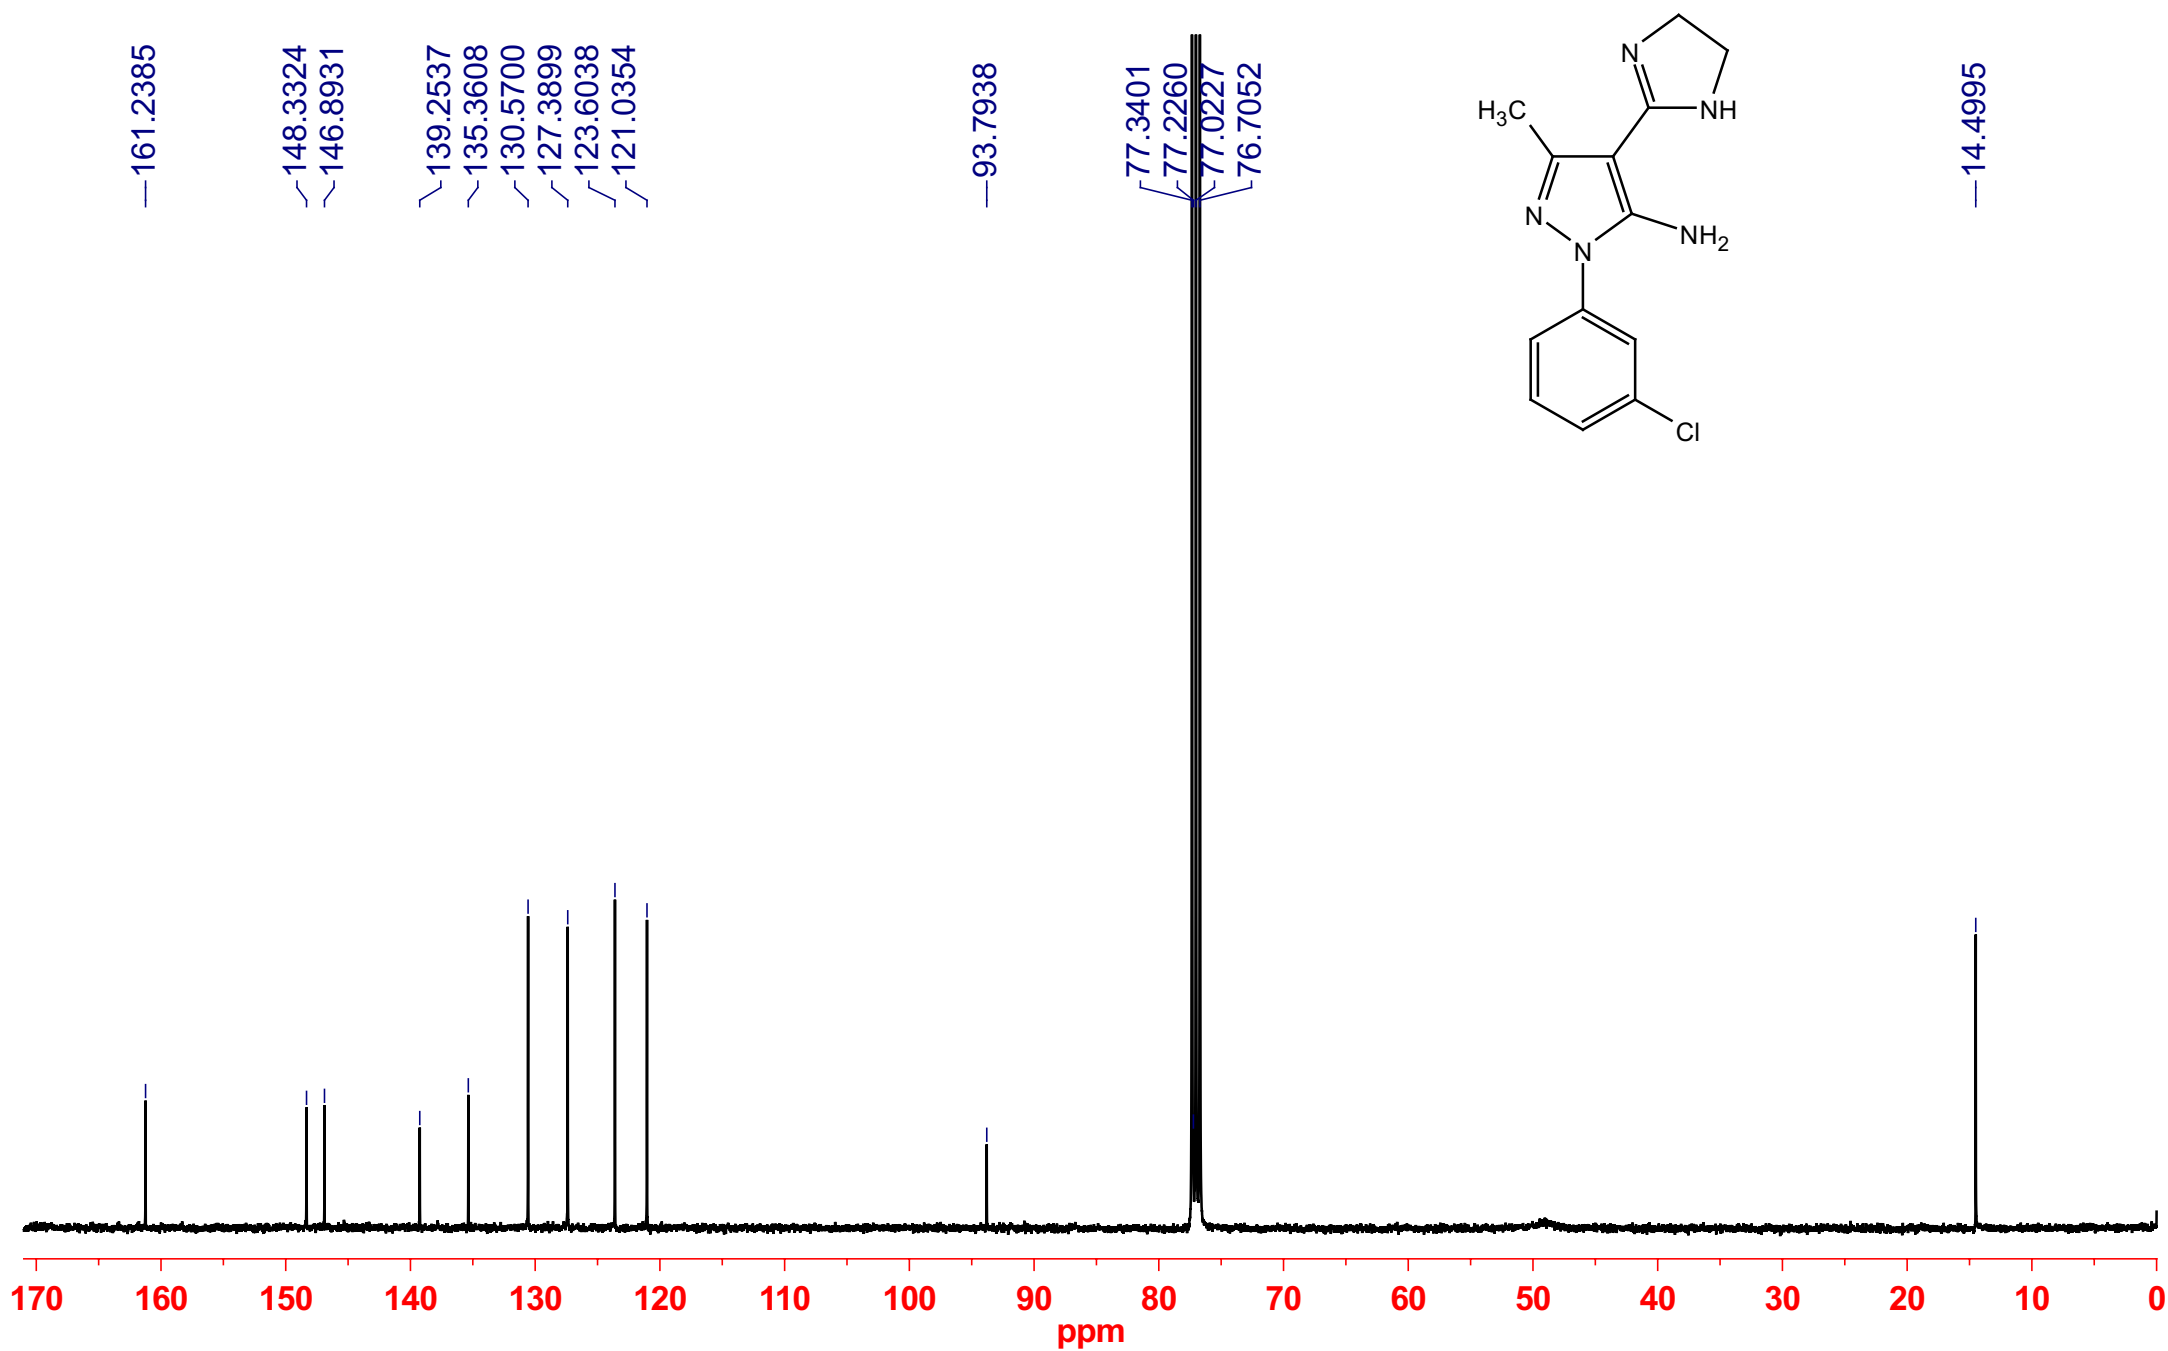

<sup>1</sup>H NMR of compound **4b**

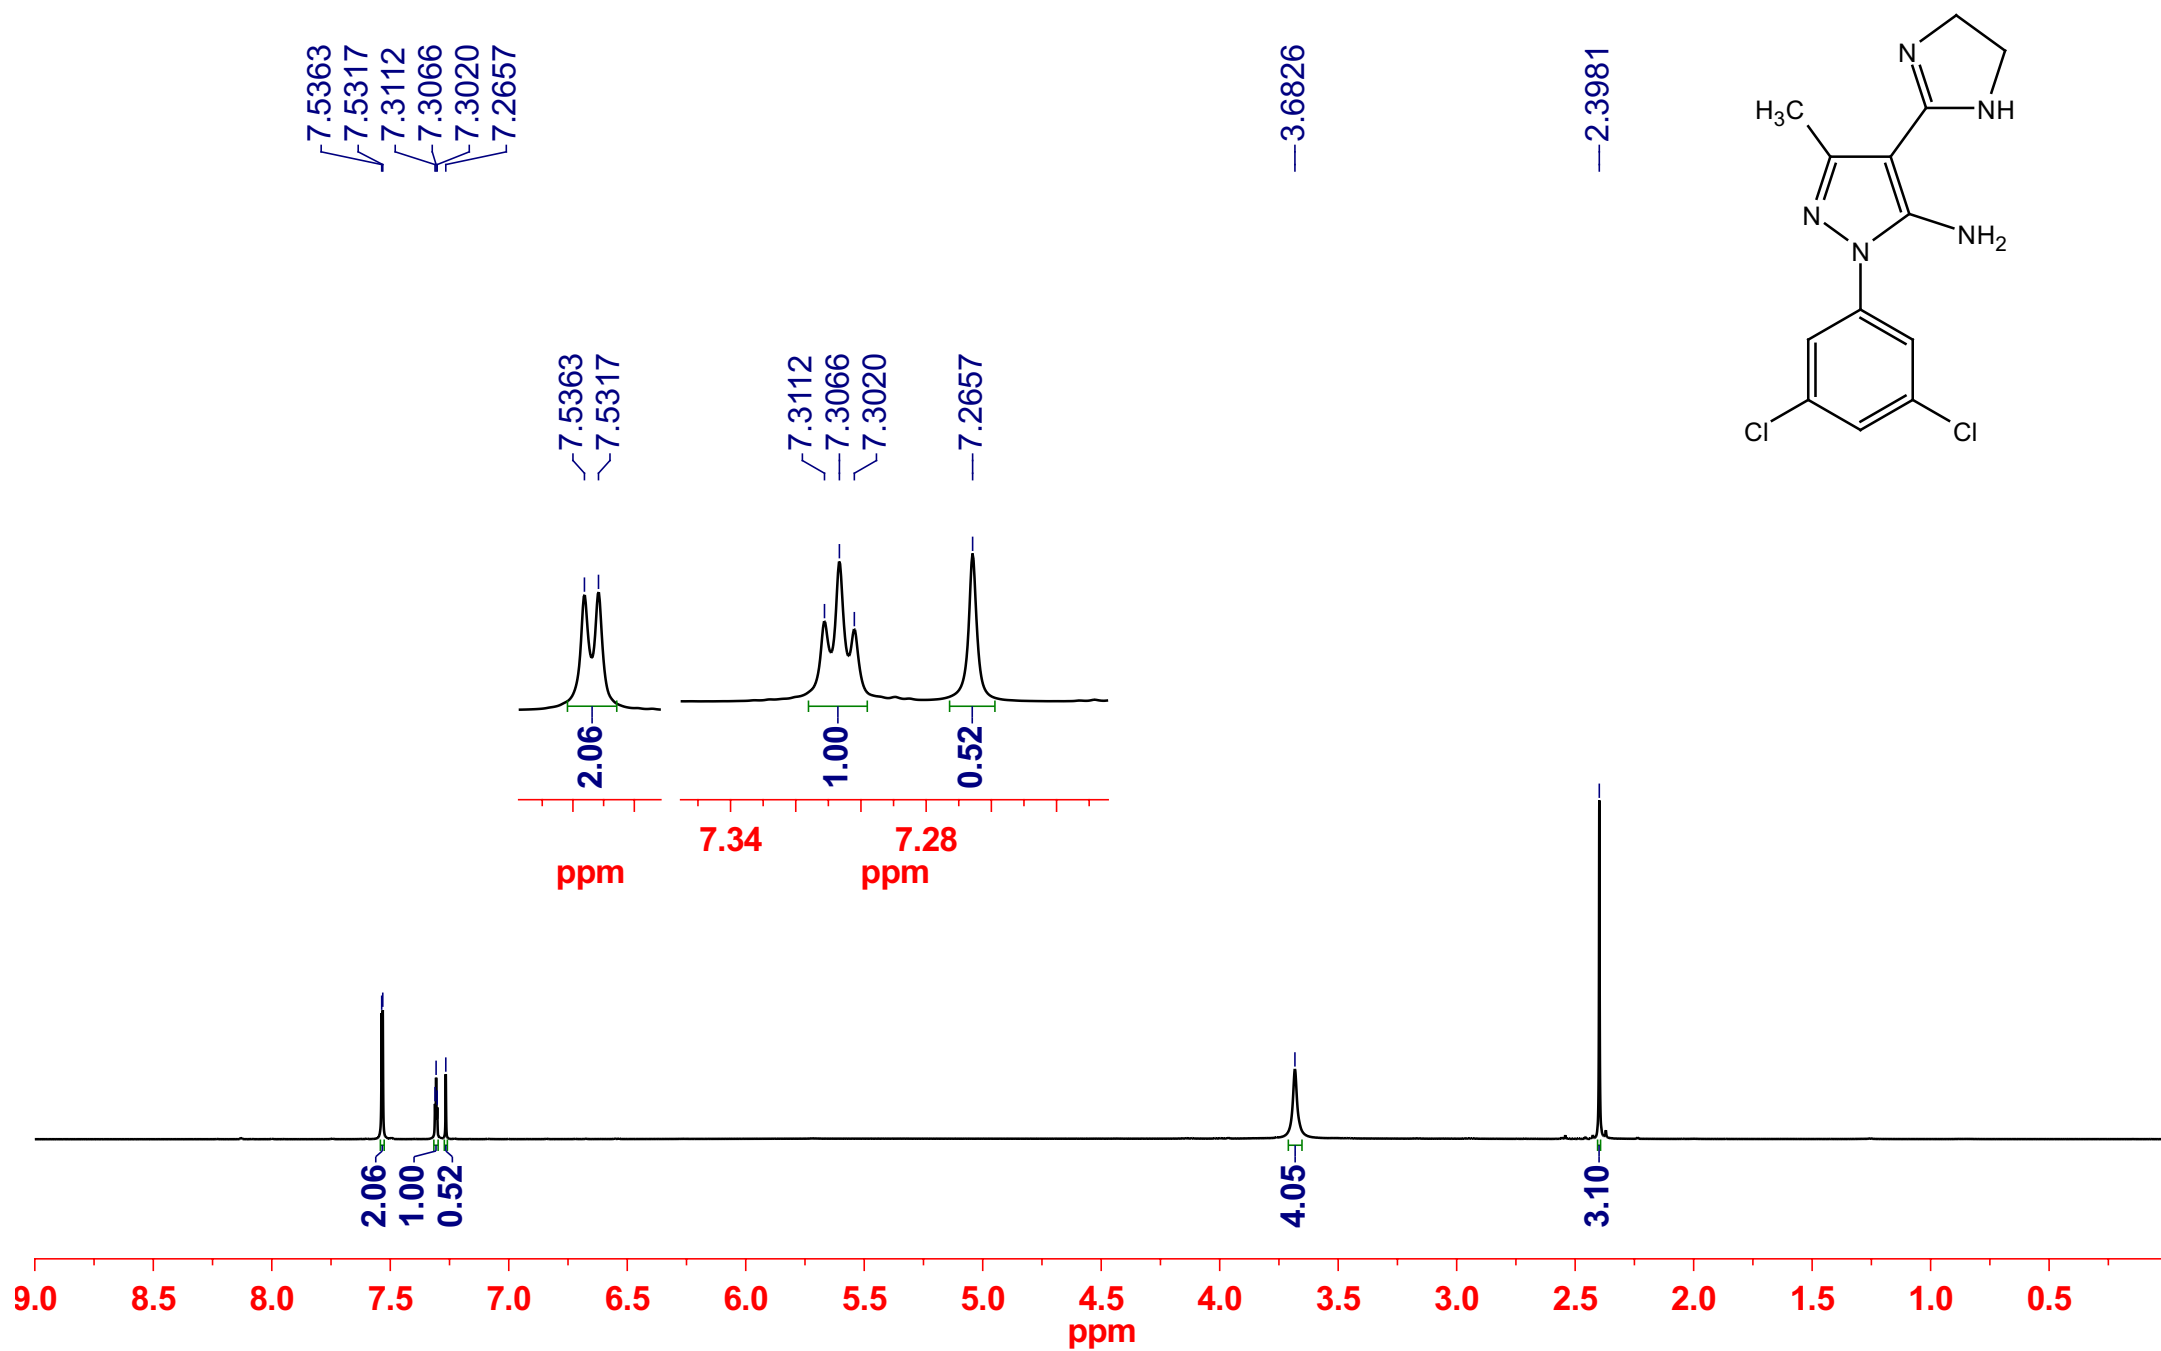

<sup>13</sup>C NMR of compound **4b**

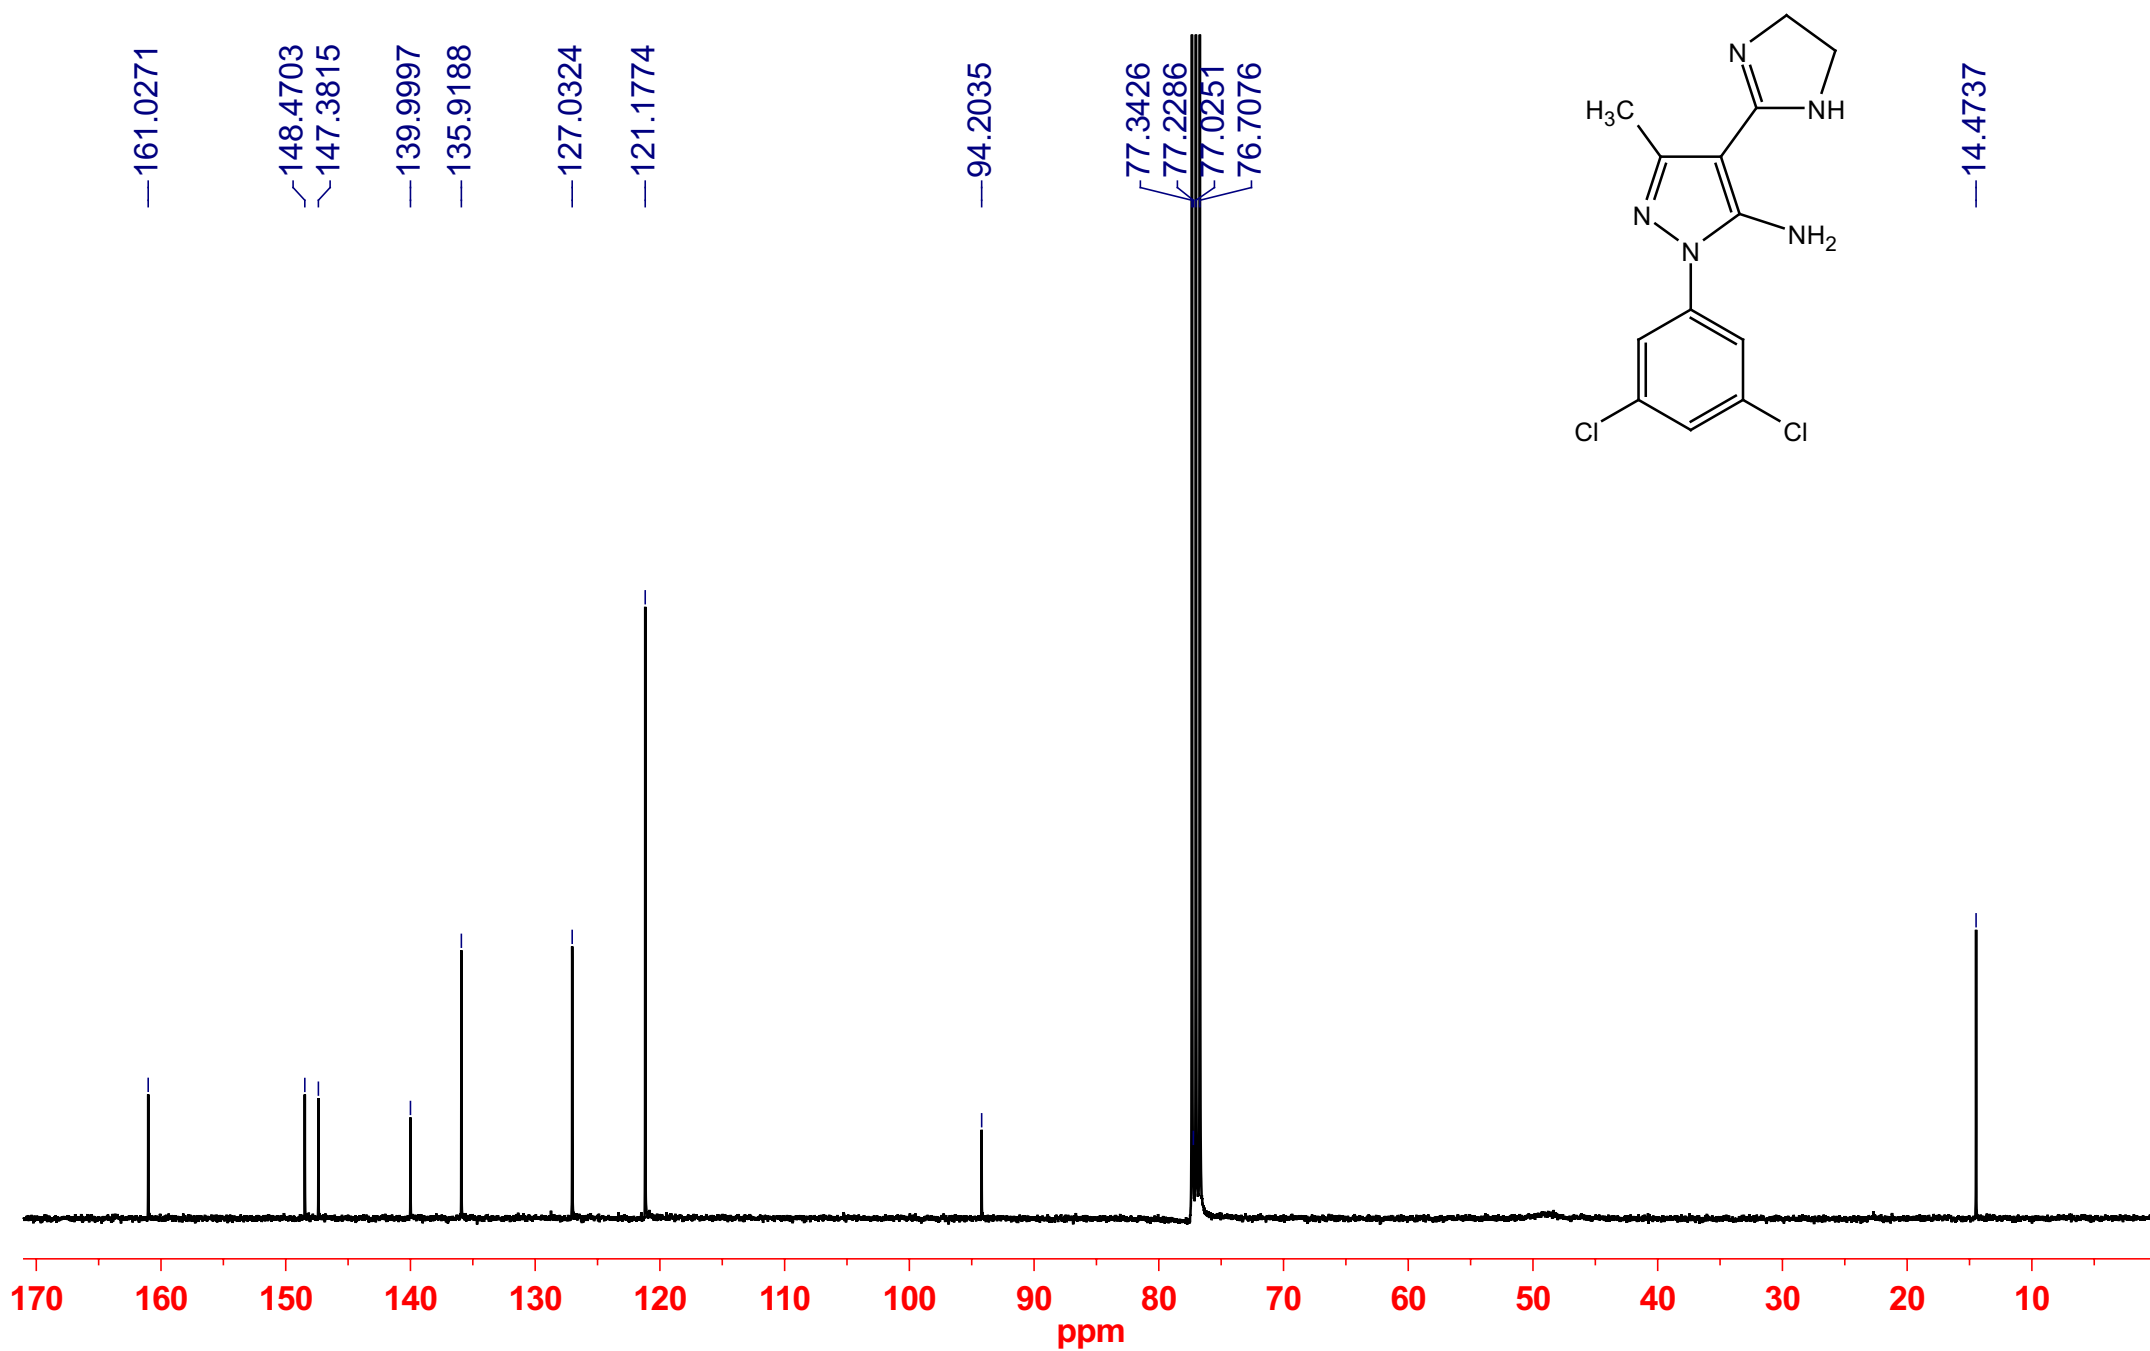

<sup>1</sup>H NMR of compound **4c**

7.7301  
7.7242  
7.5468  
7.5252  
7.4623  
7.4563  
7.4407  
7.4347  
7.2653

3.6831

2.4003

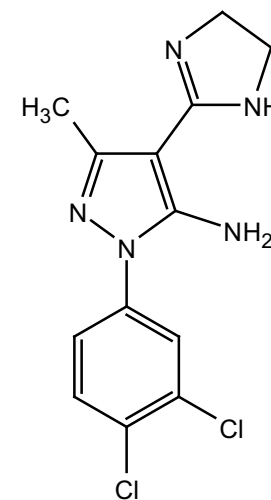

7.7301  
7.7242

7.5468  
7.5252

7.4623  
7.4563  
7.4407  
7.4347

7.2653

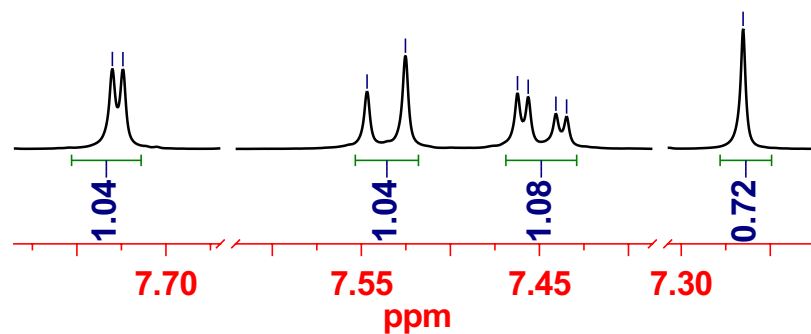

1.00  
1.04  
1.08  
0.72

4.02

3.08

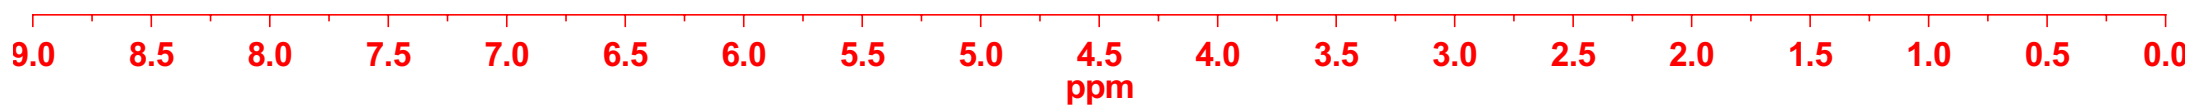

<sup>13</sup>C NMR of compound **4c**

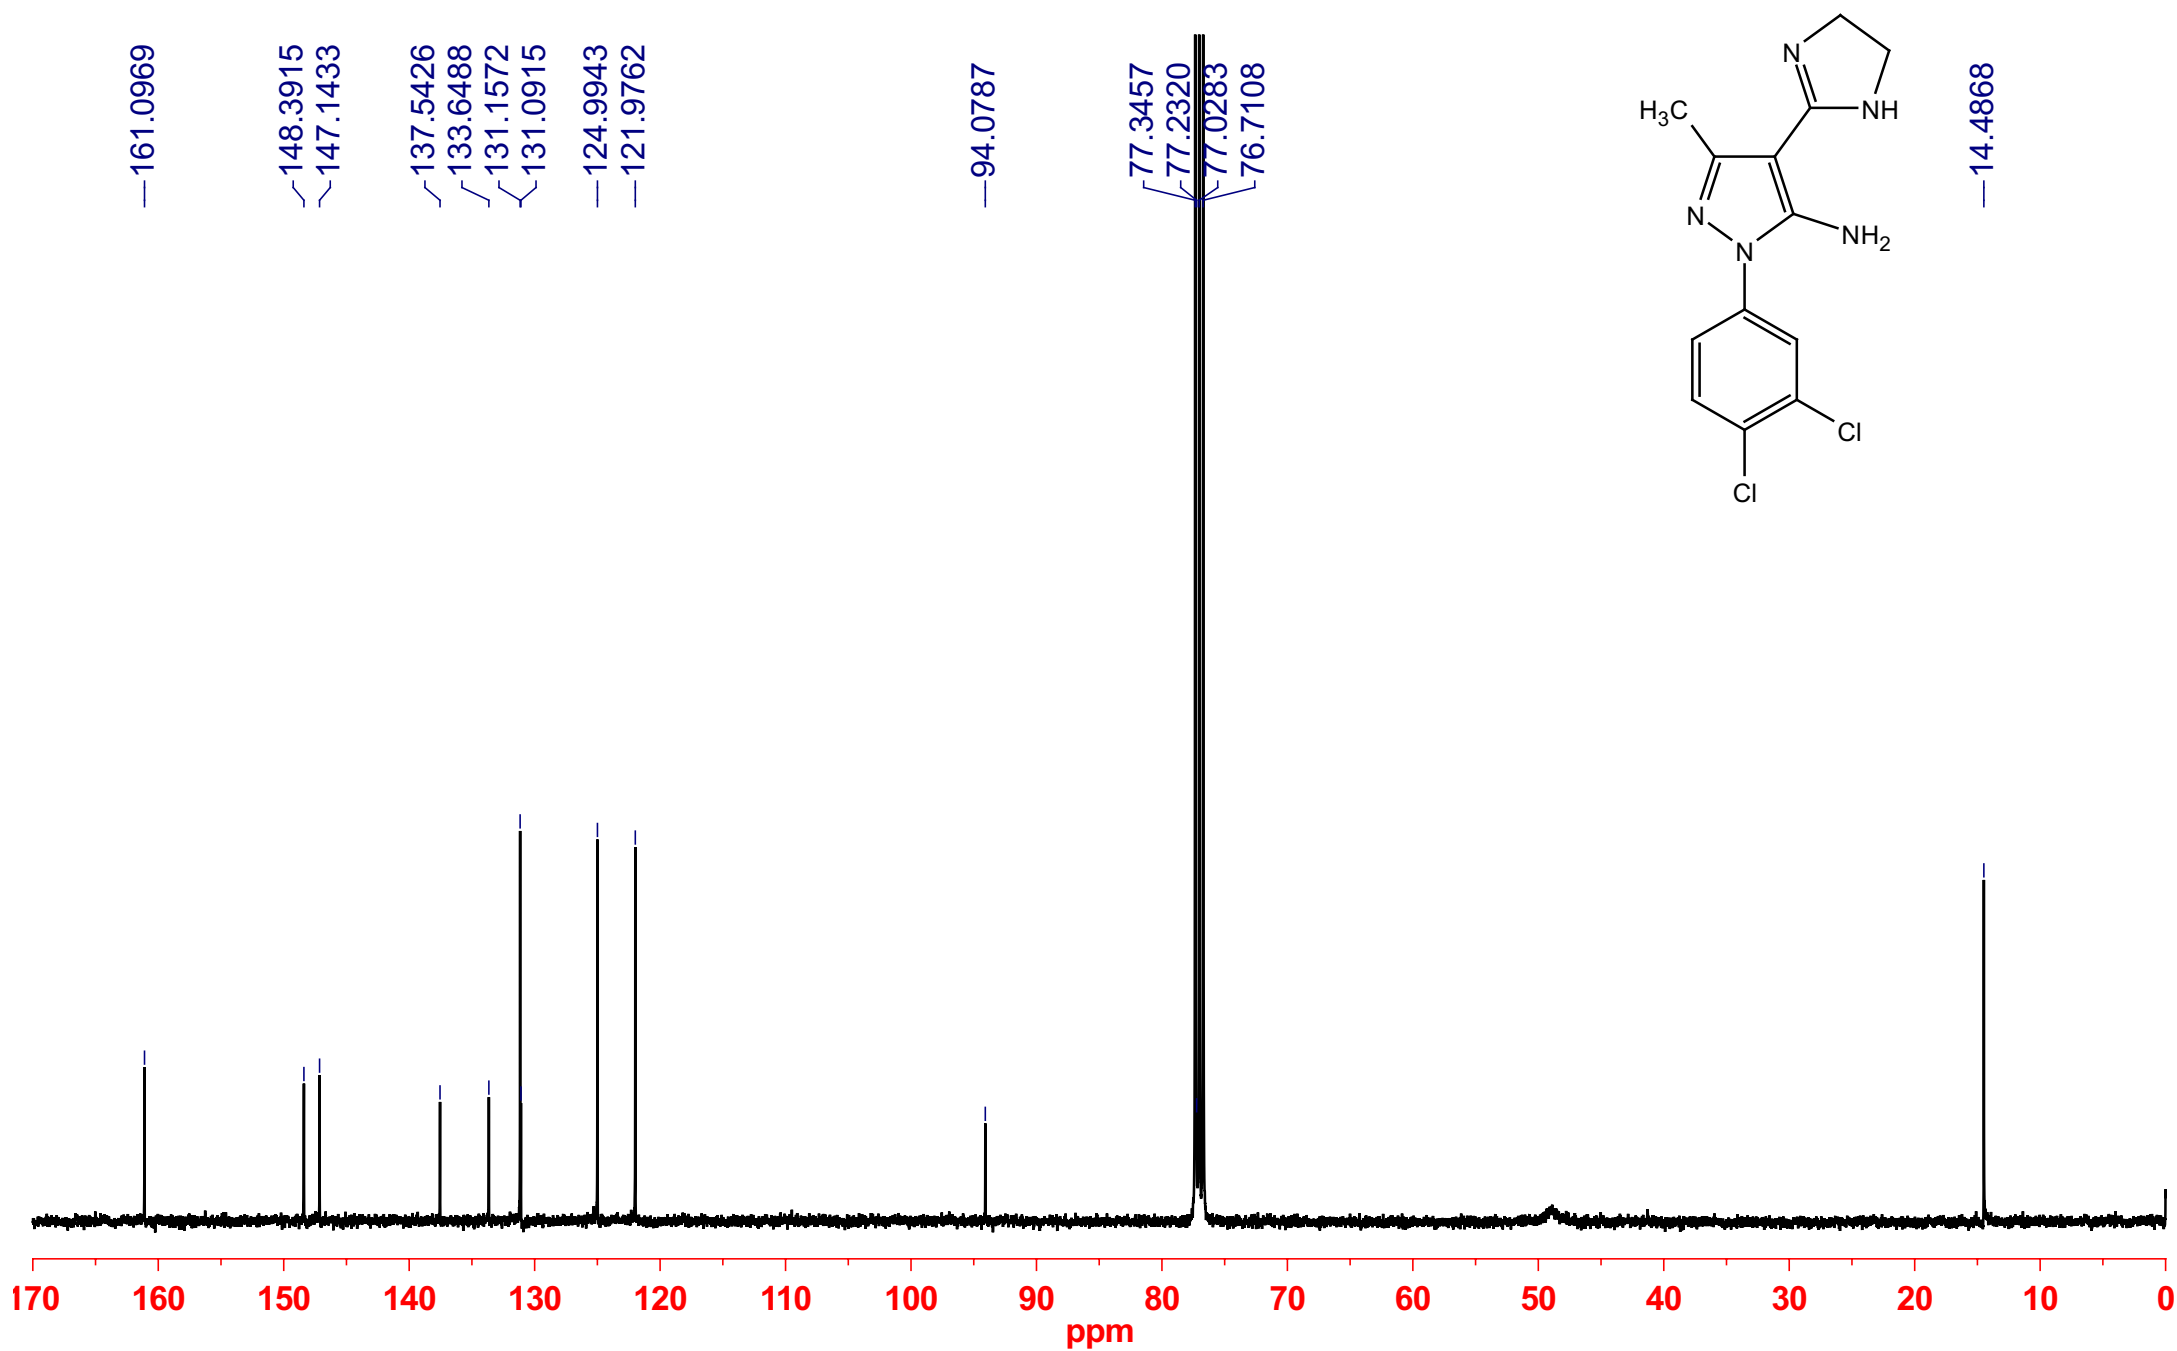

<sup>1</sup>H NMR of compound **5a**

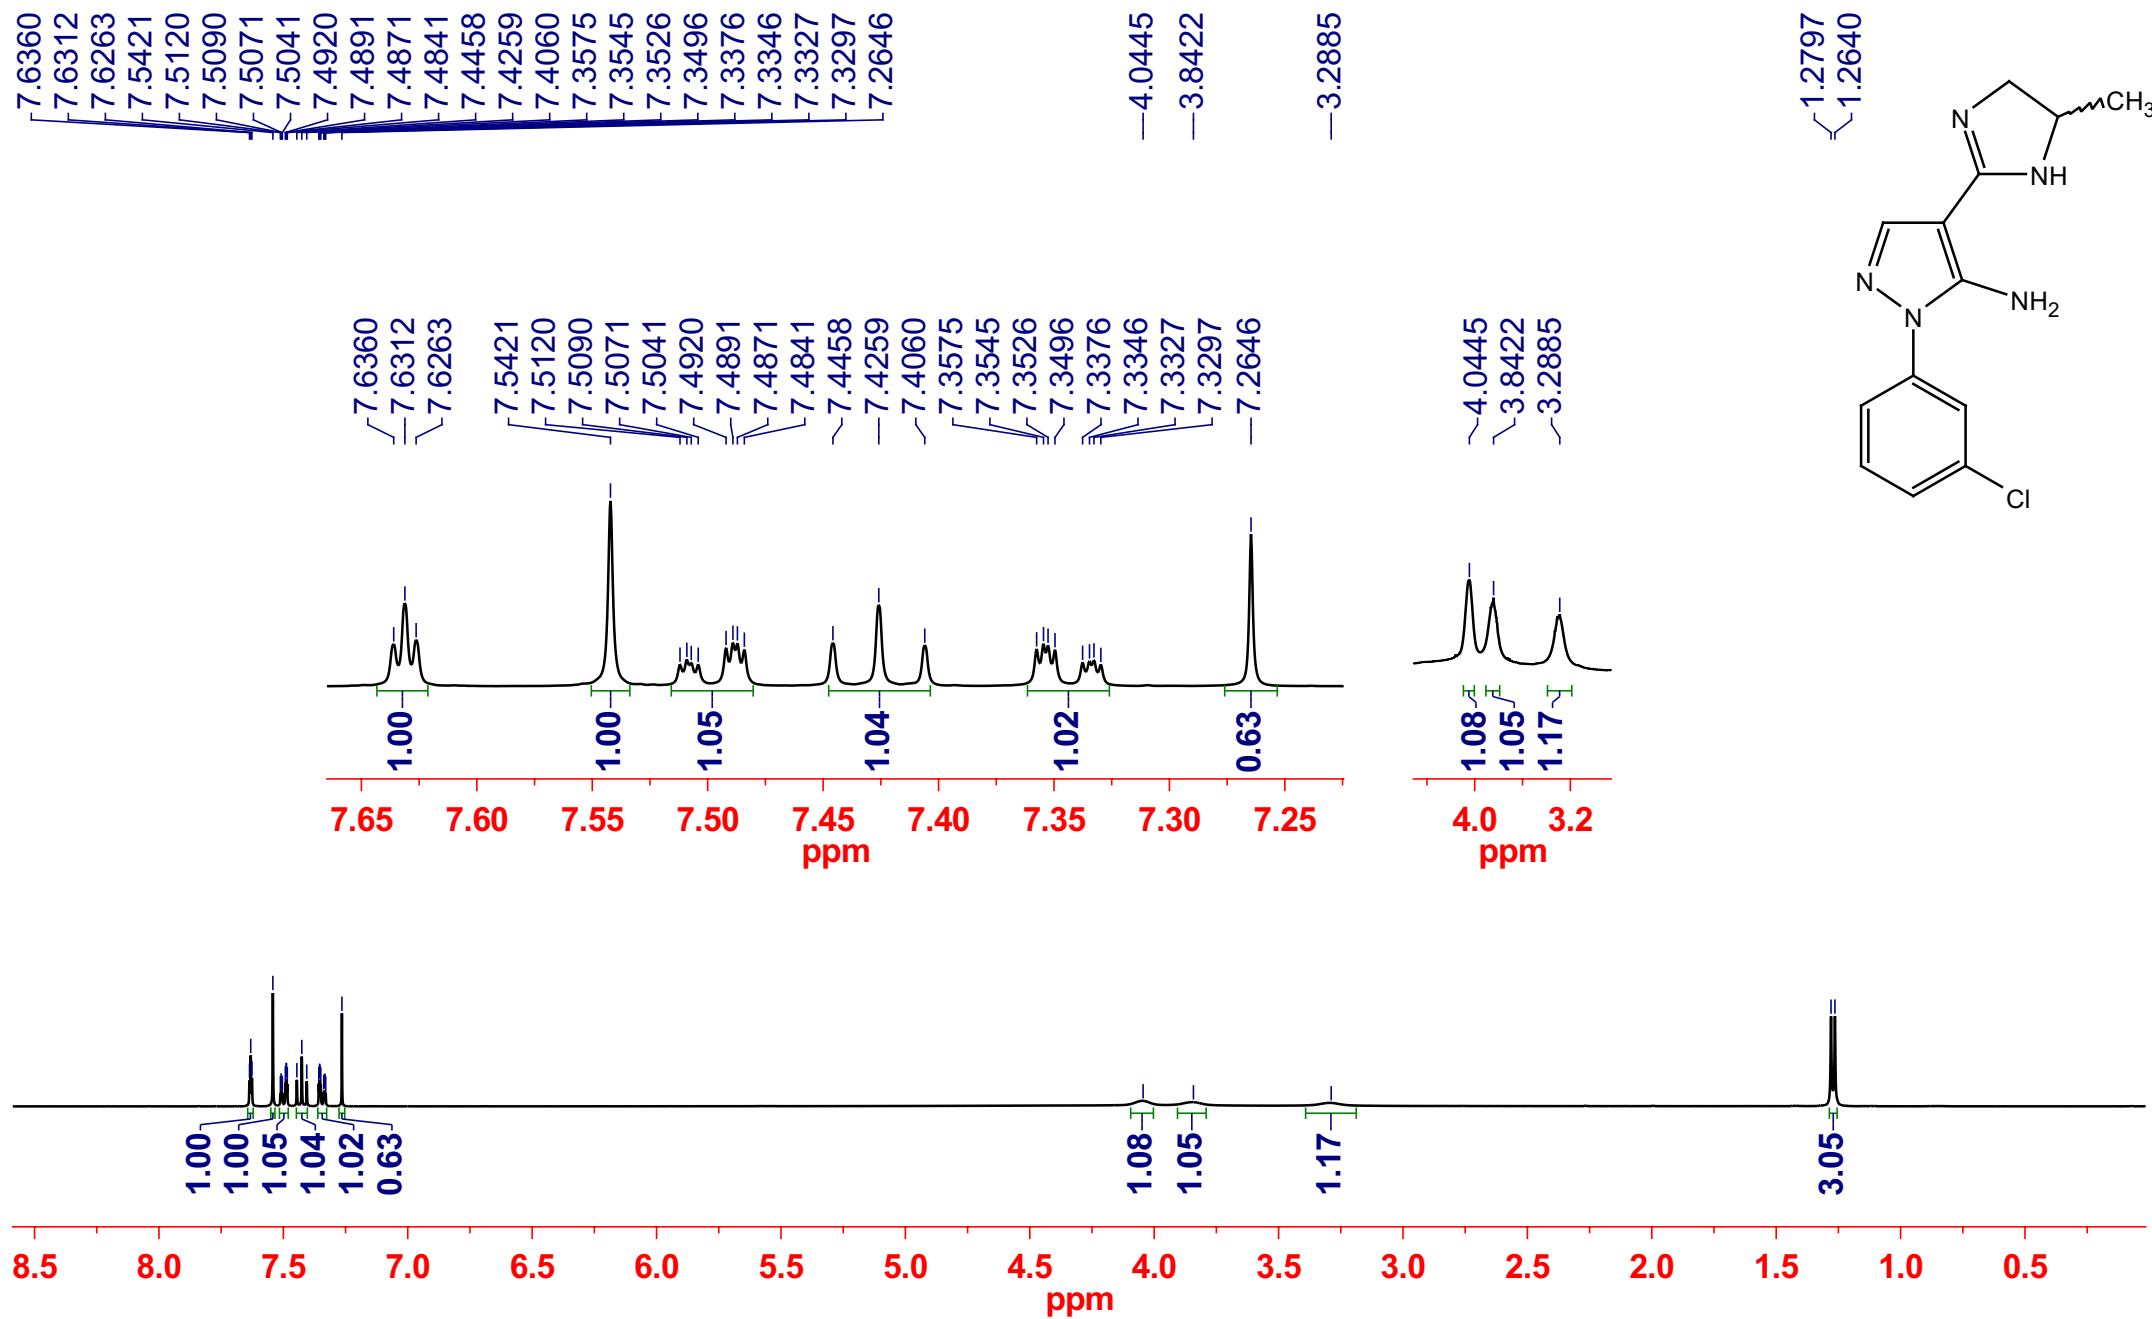

<sup>13</sup>C NMR of compound **5a**

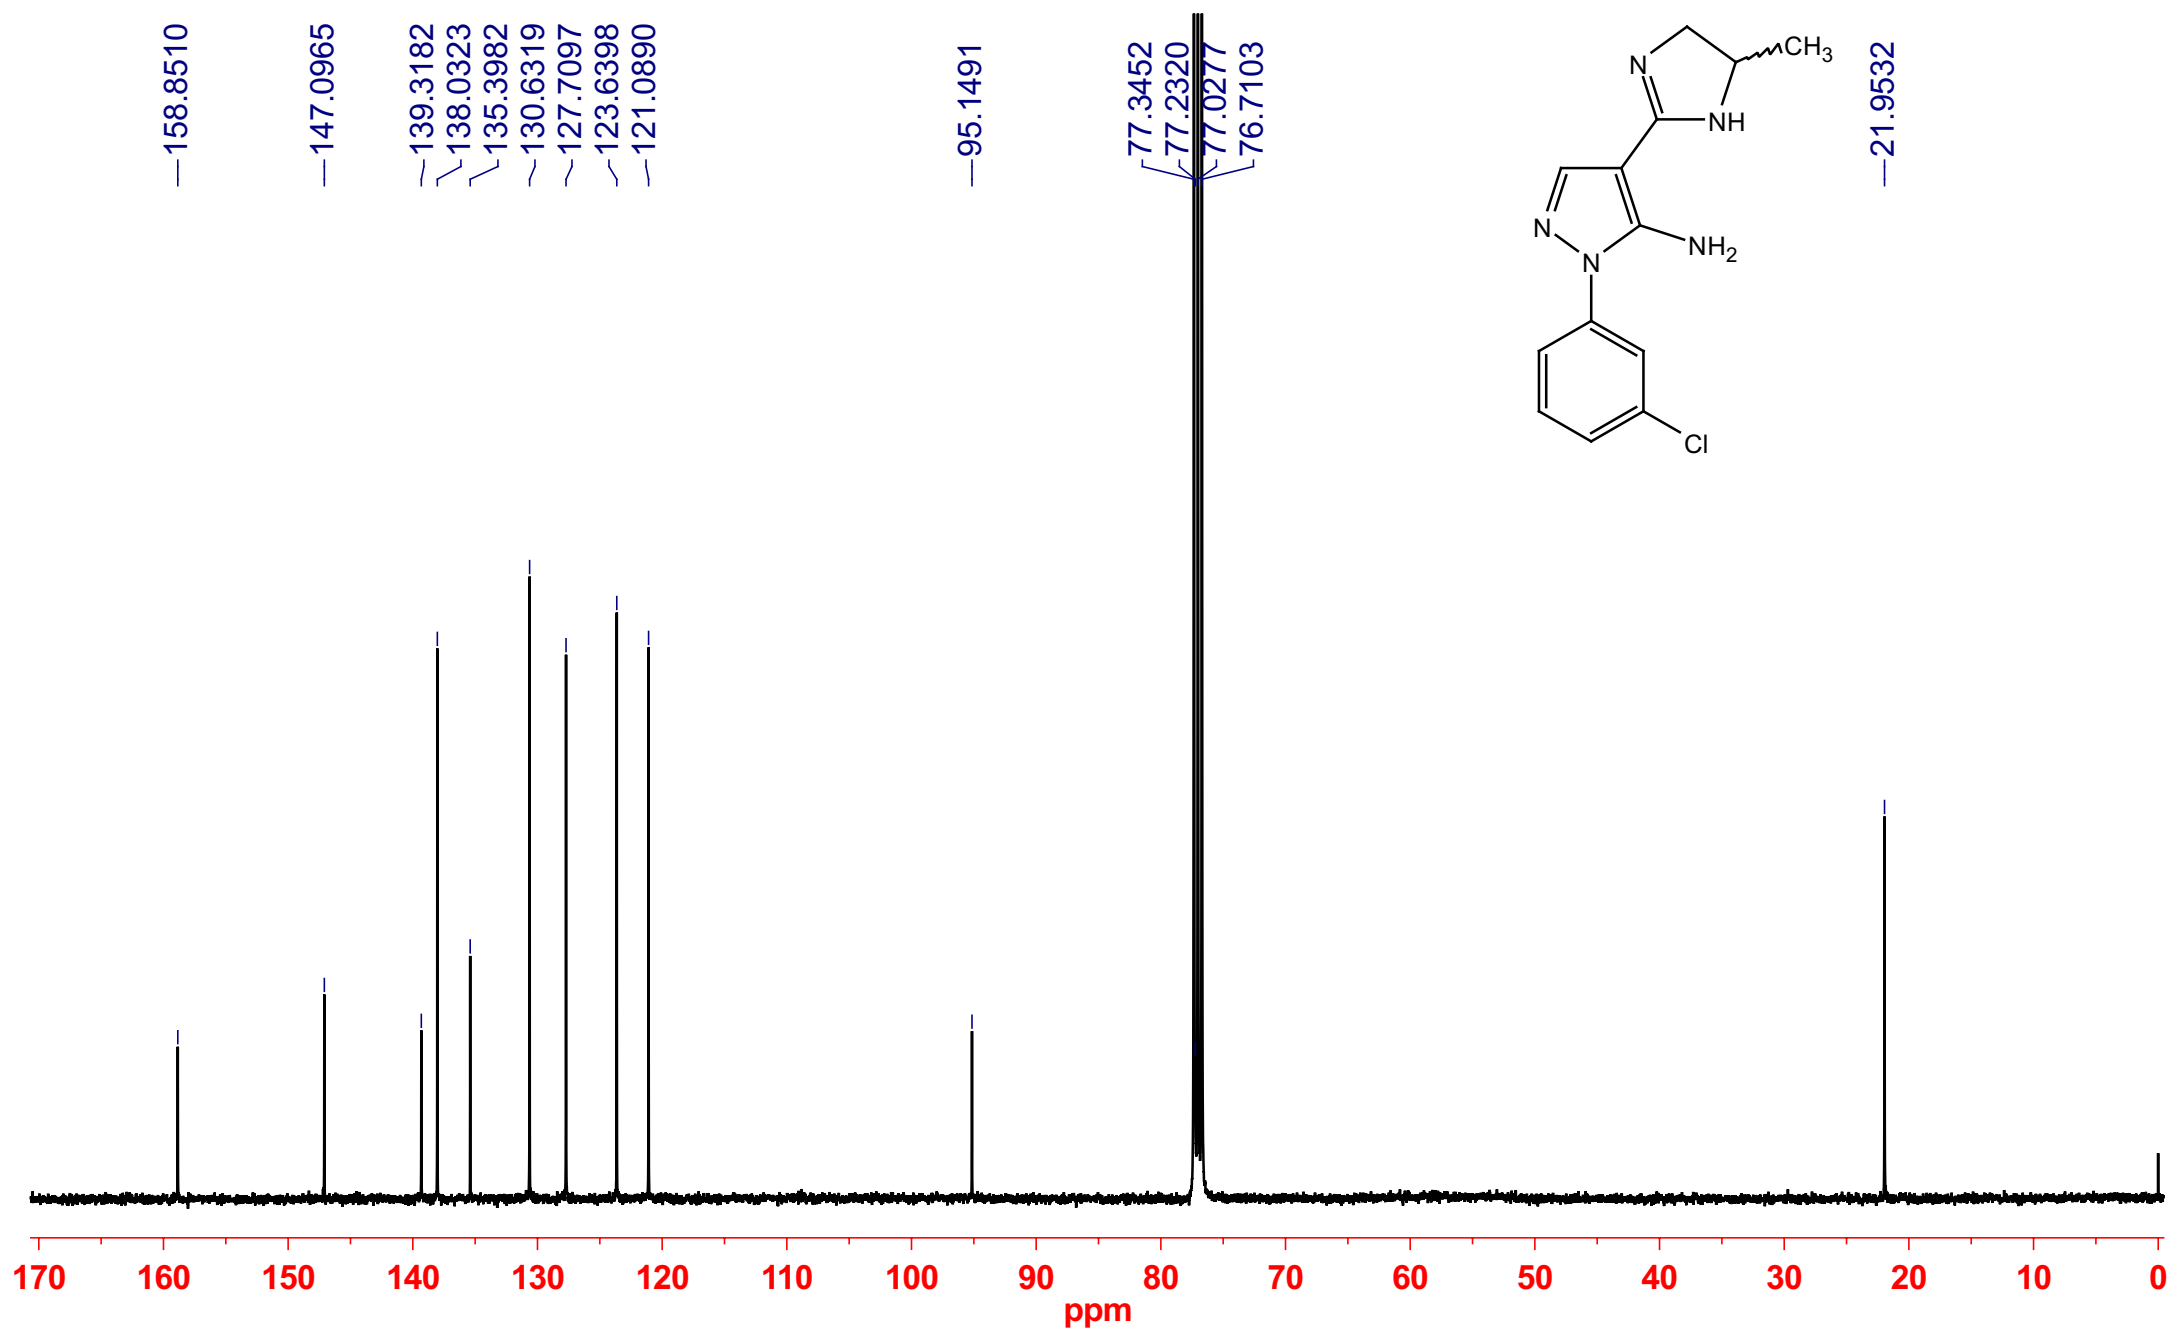



<sup>1</sup>H NMR of compound **5b**

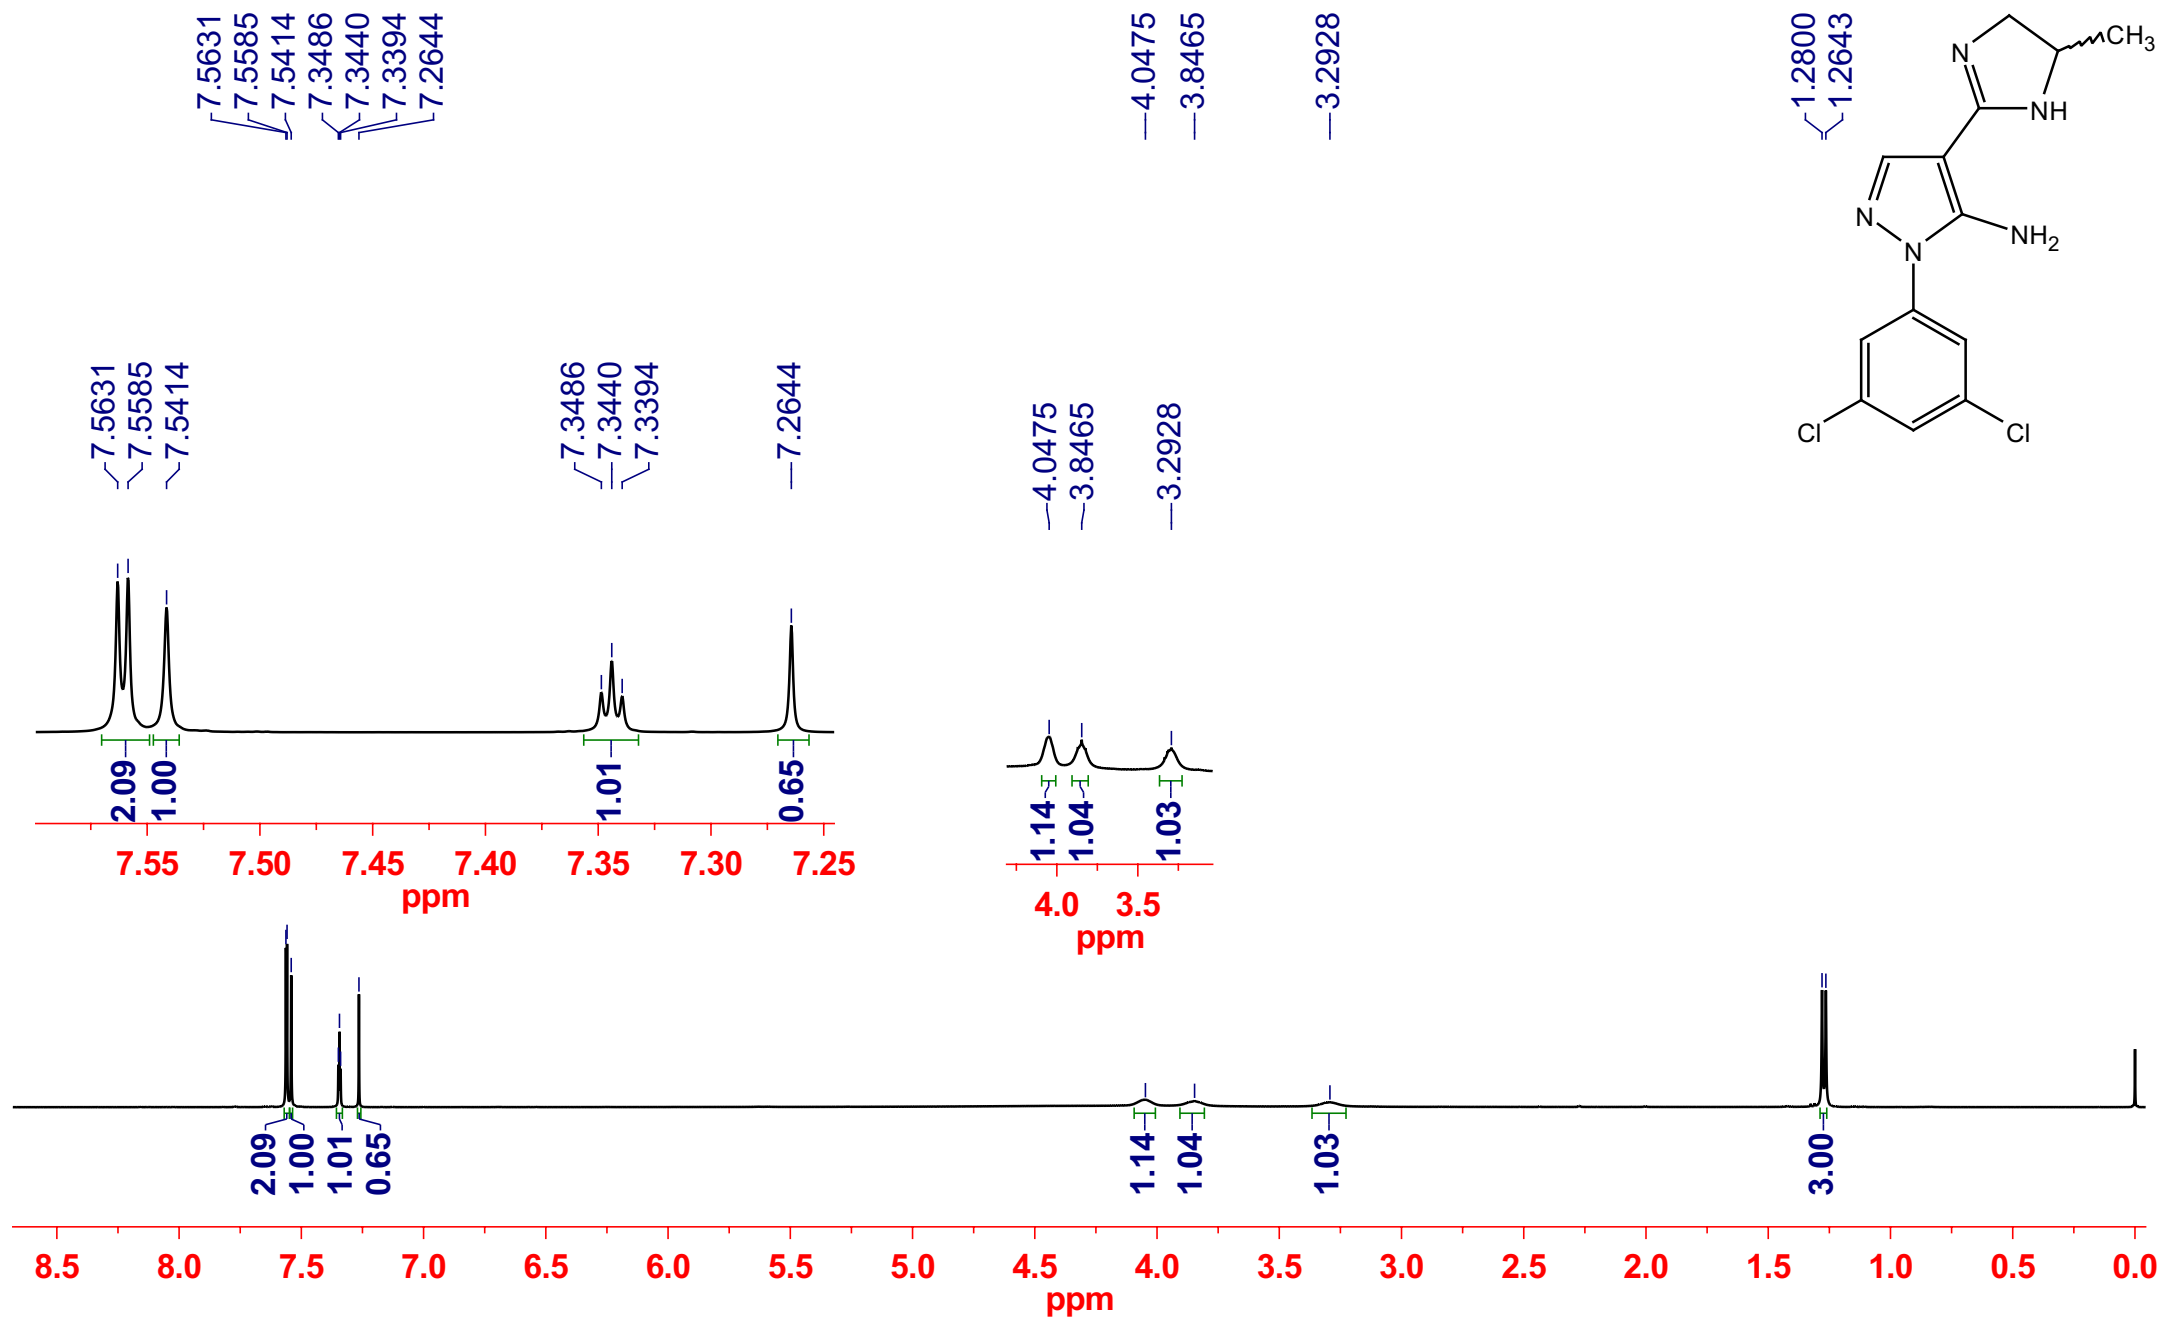

<sup>13</sup>C NMR of compound **5b**

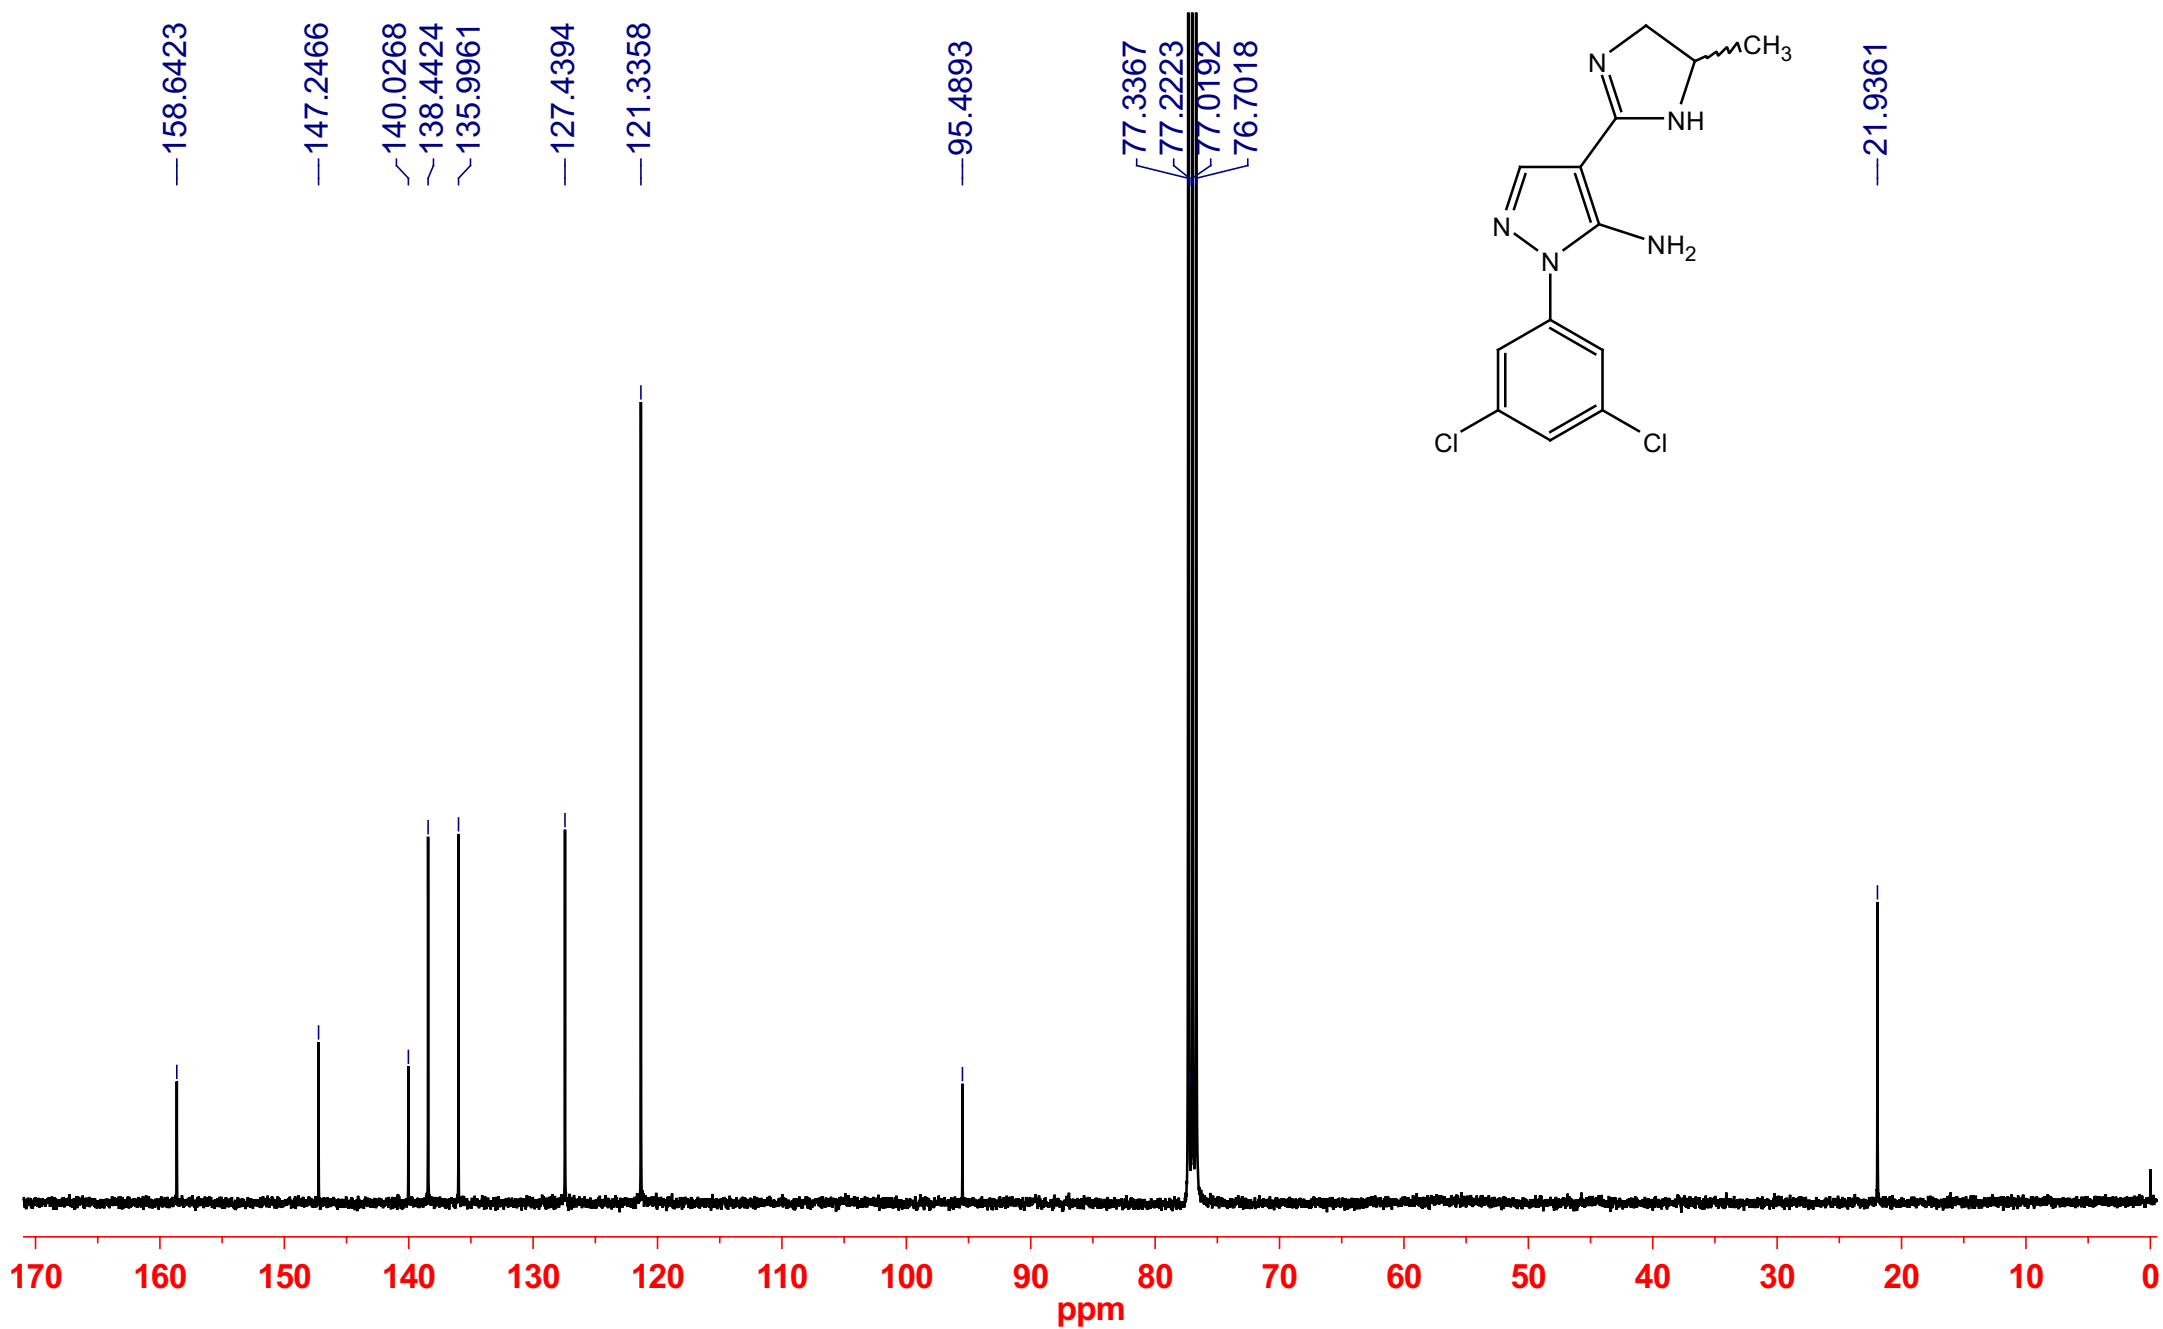

<sup>1</sup>H NMR of compound **5c**

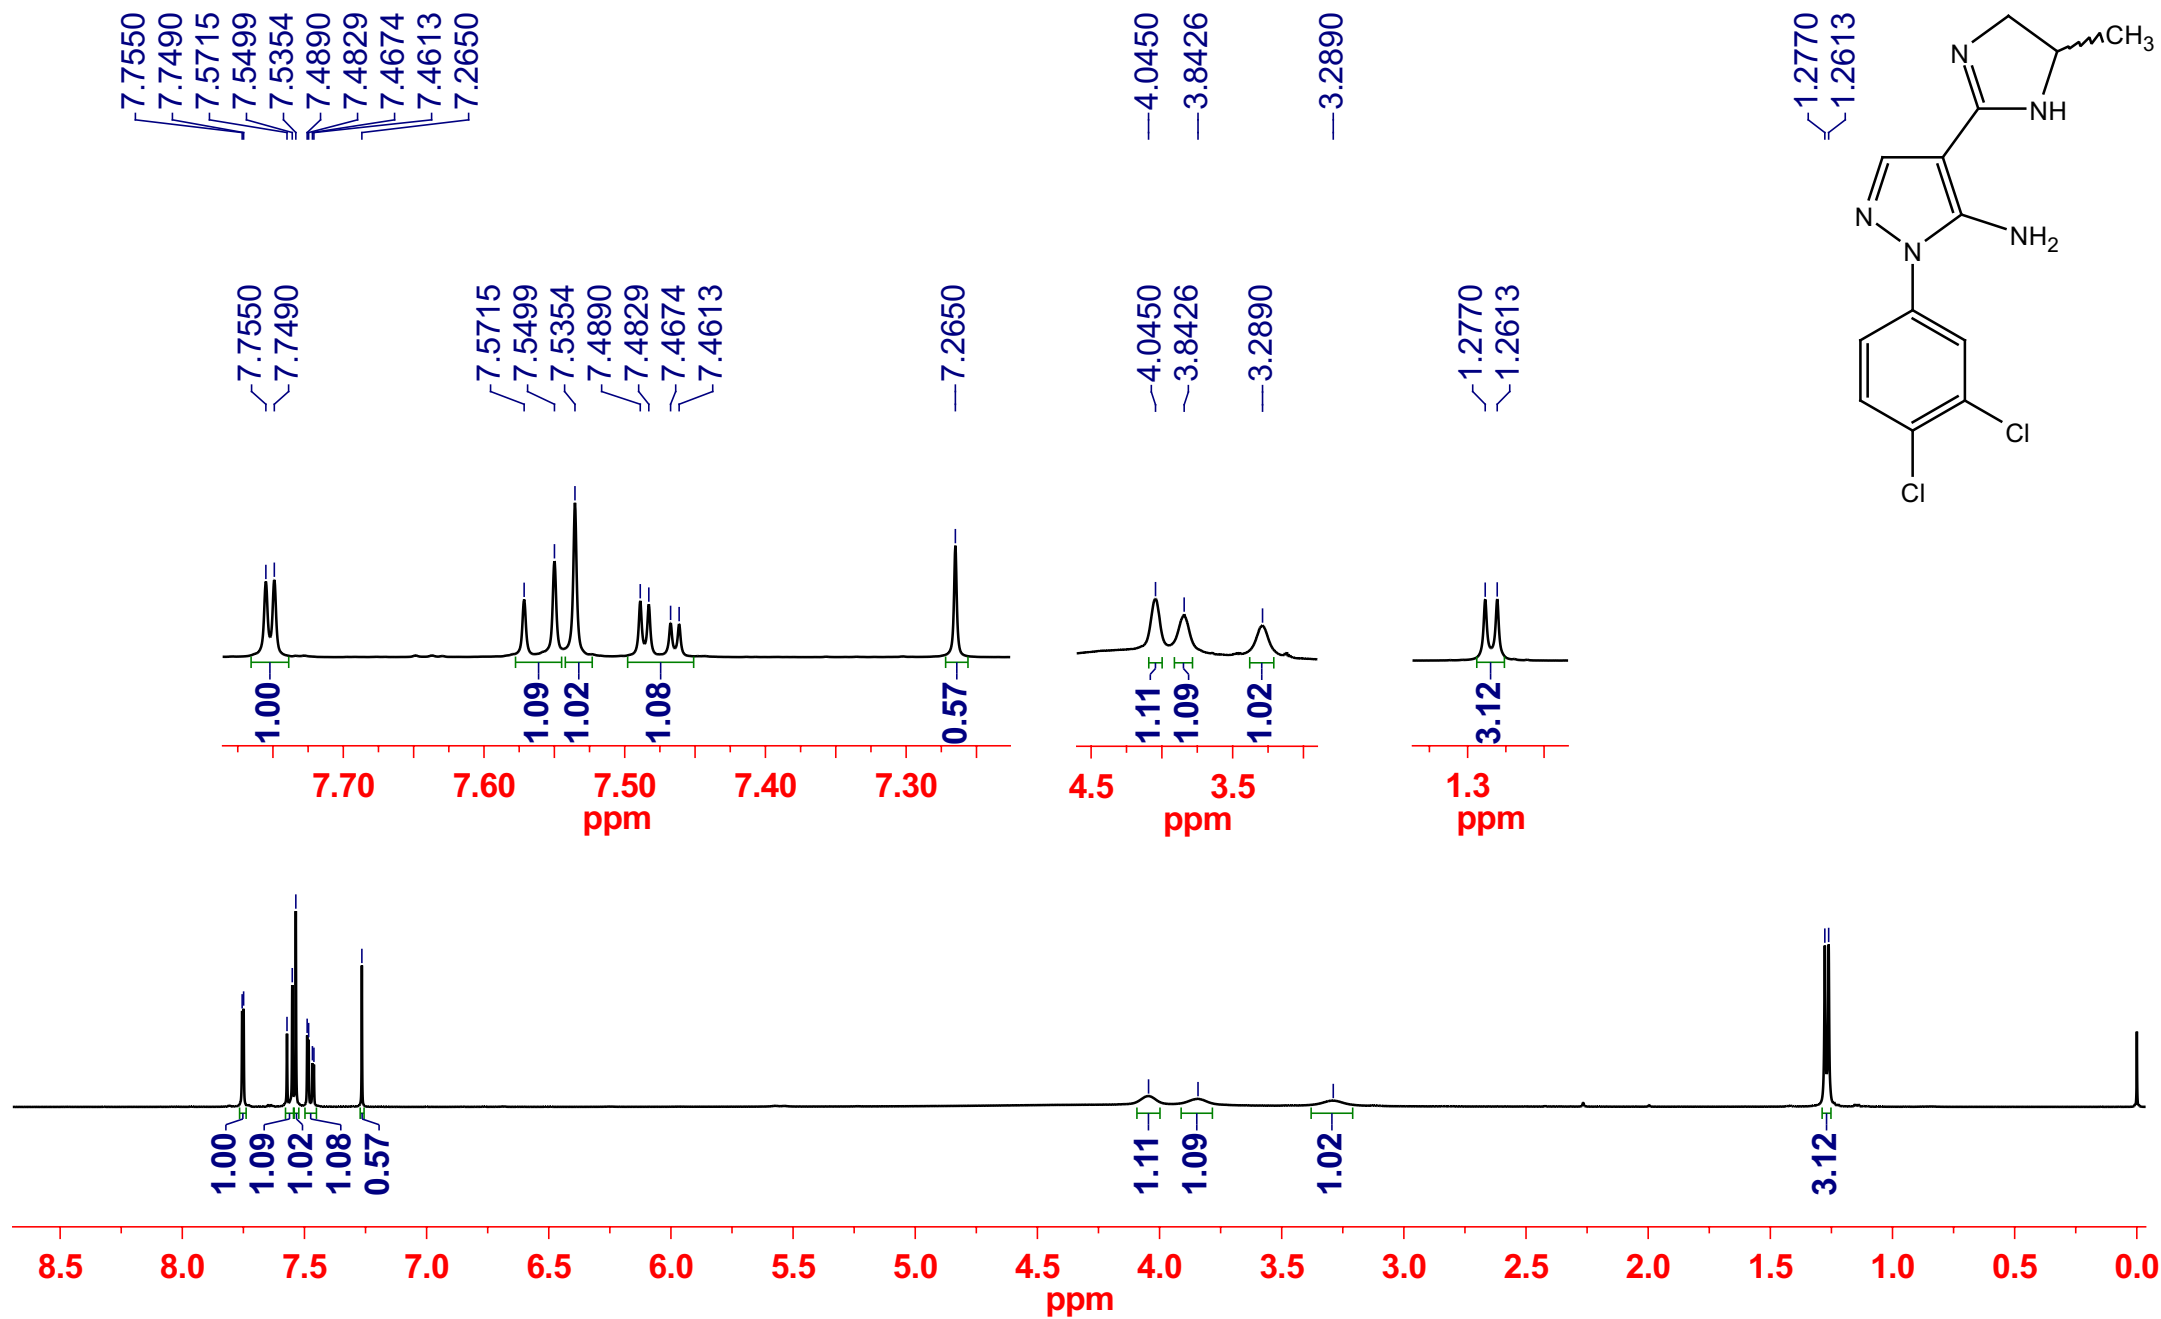

<sup>13</sup>C NMR of compound **5c**

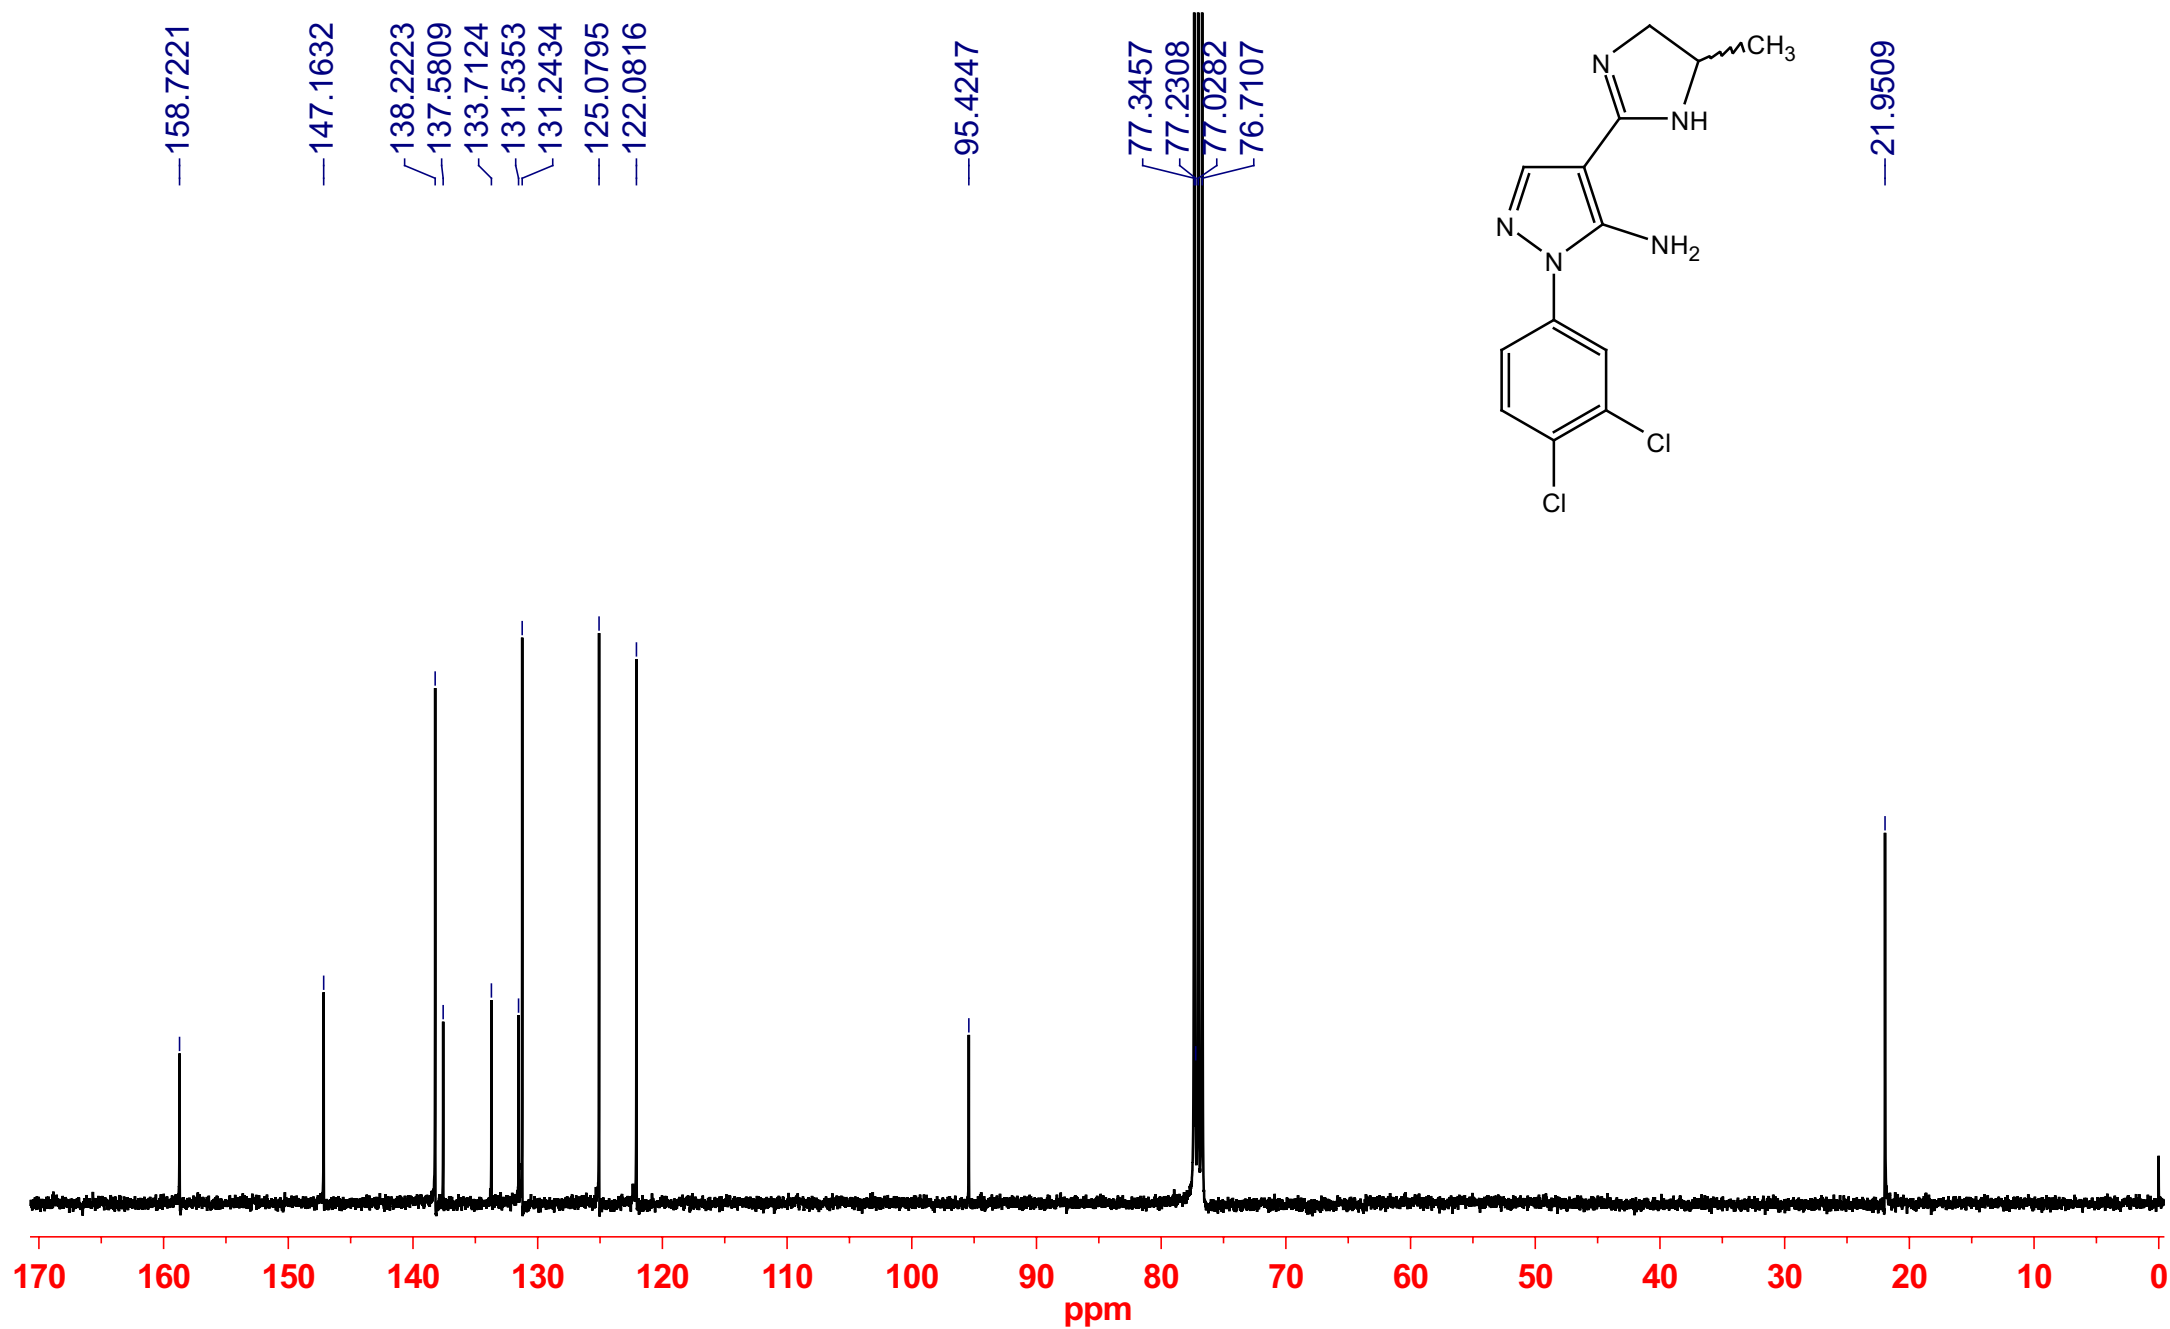

### HRMS of compound **1a**

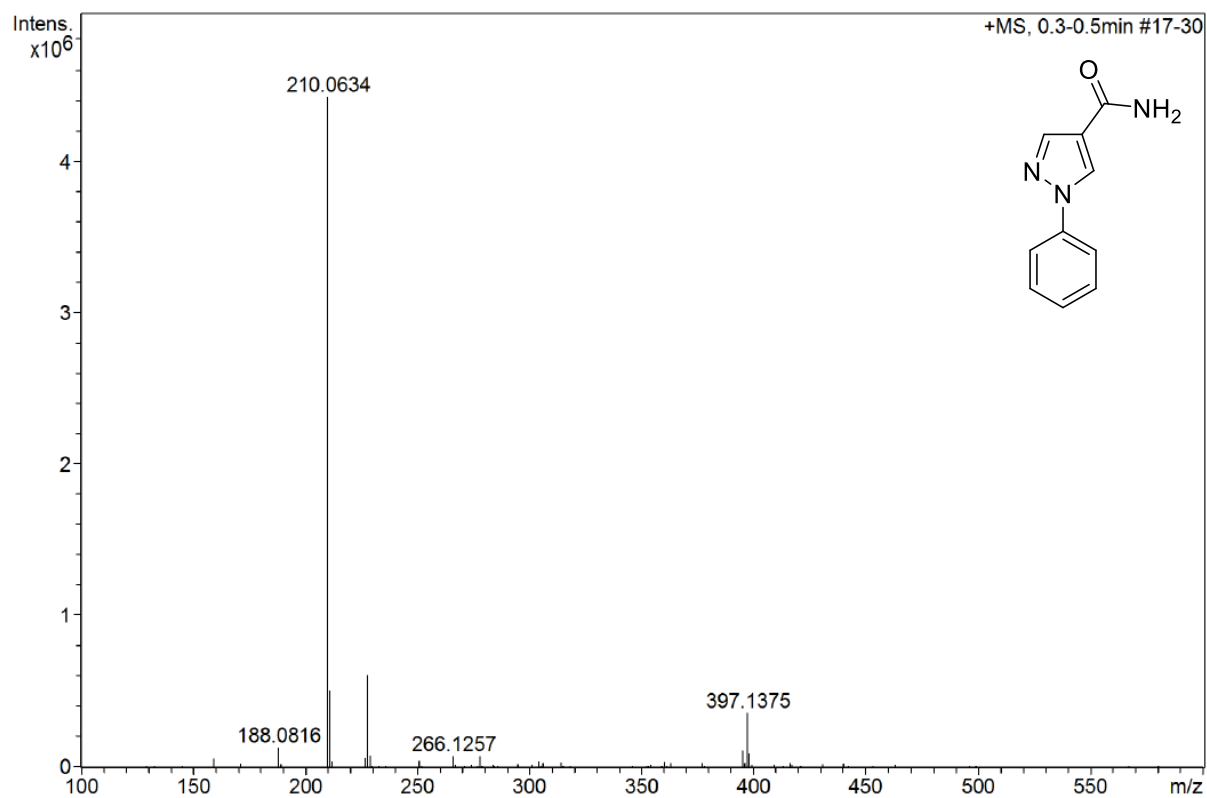

### HRMS of compound **1b**

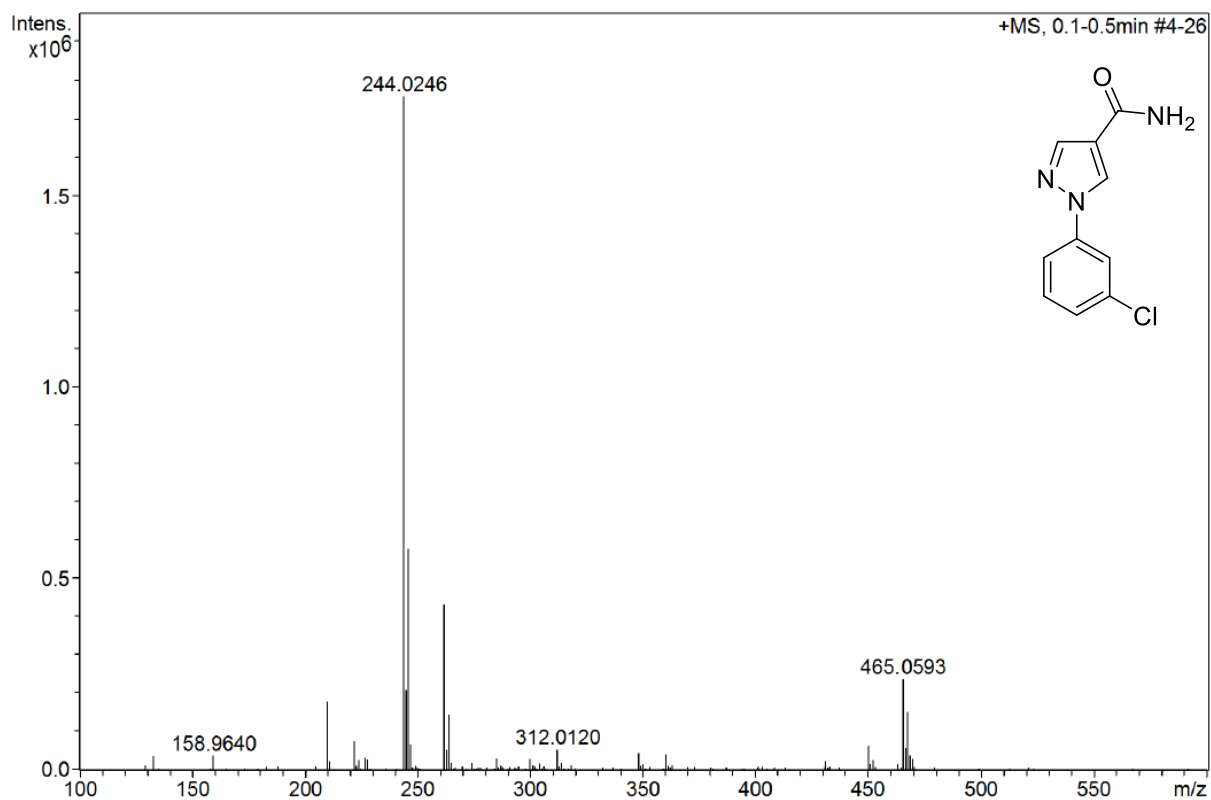

HRMS of compound **1c**

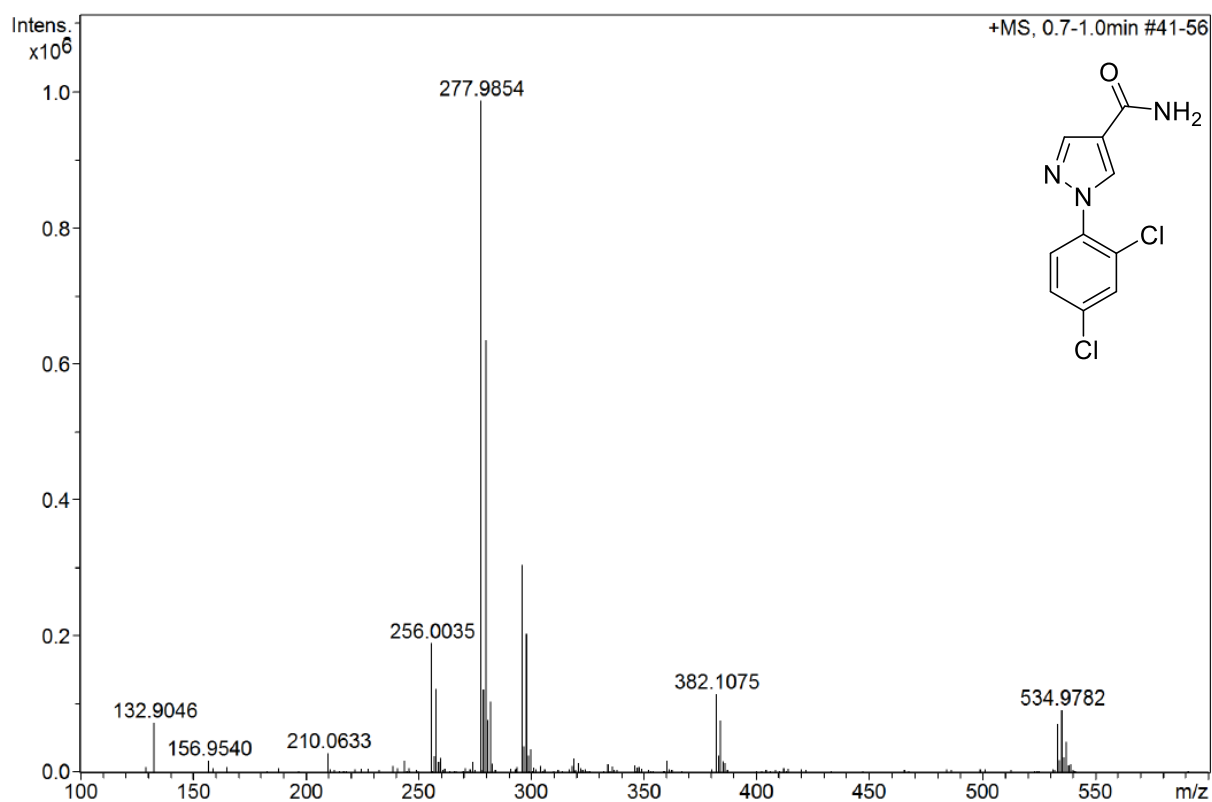

HRMS of compound **1d**

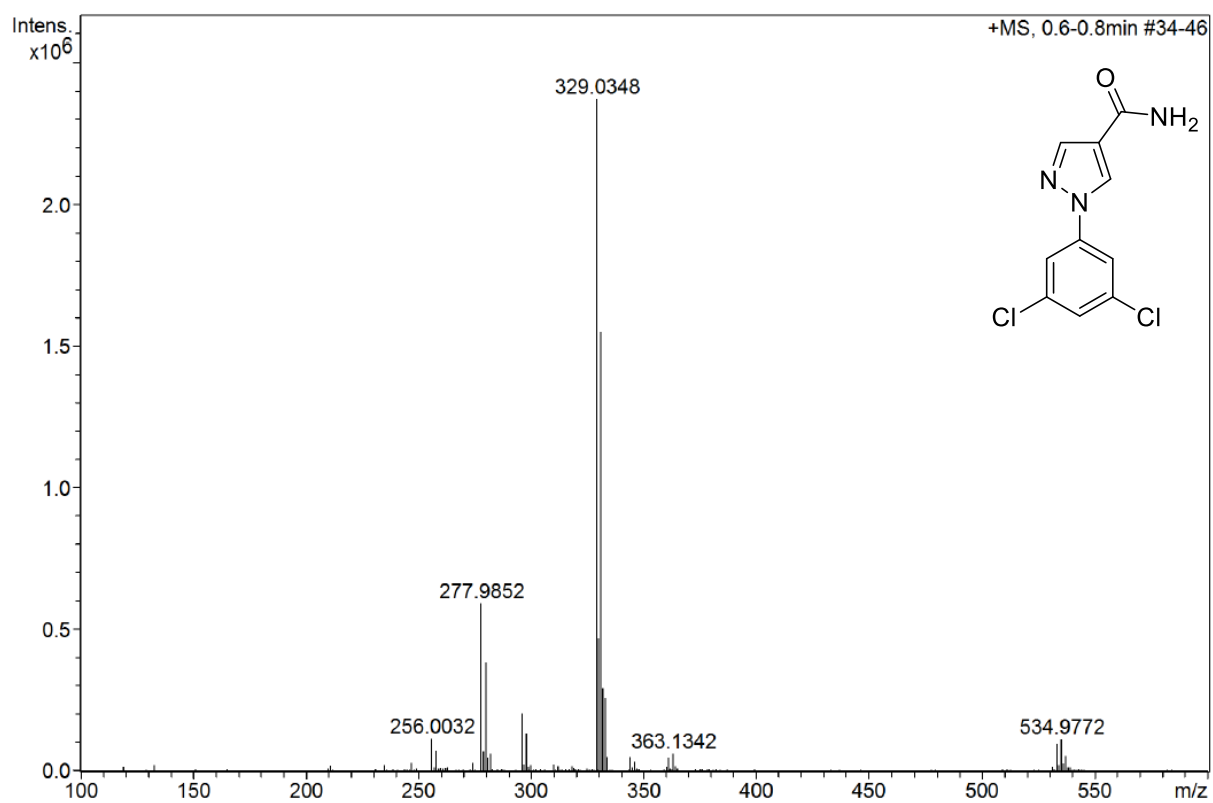

HRMS of compound **1e**

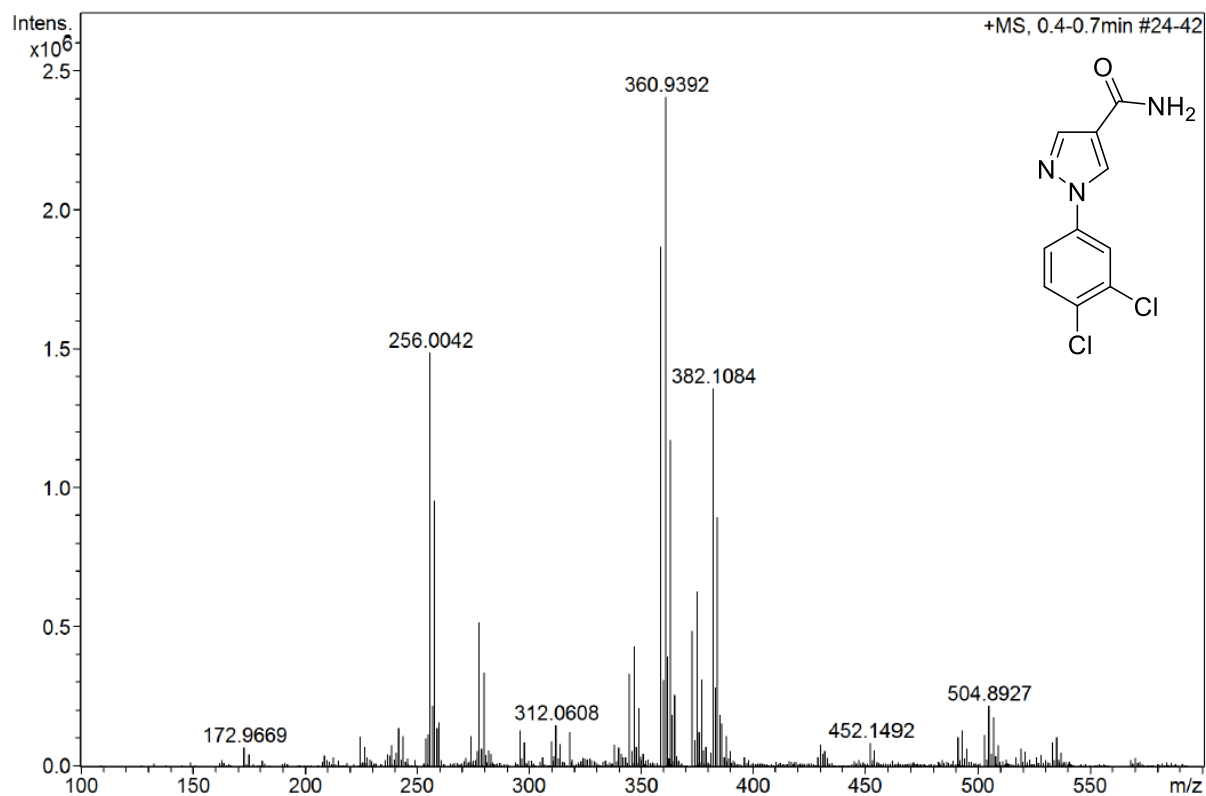

HRMS of compound **1f**

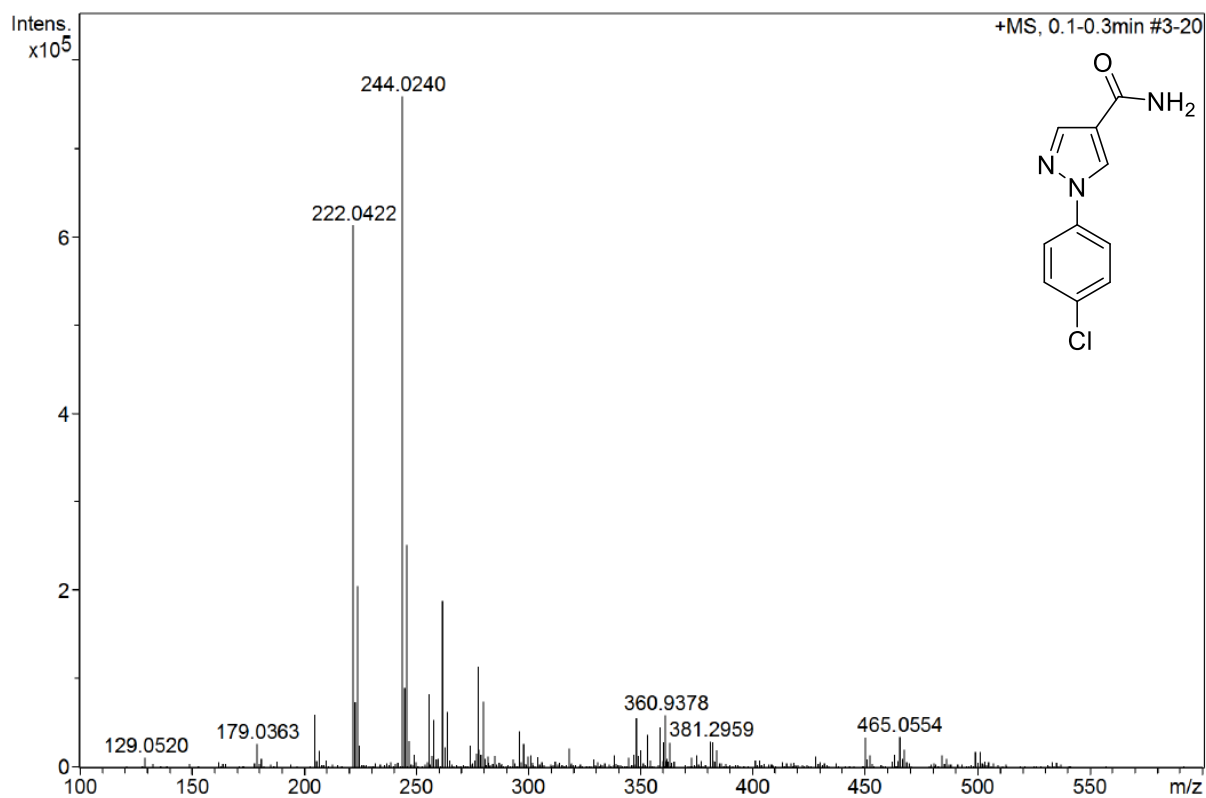

HRMS of compound **1g**

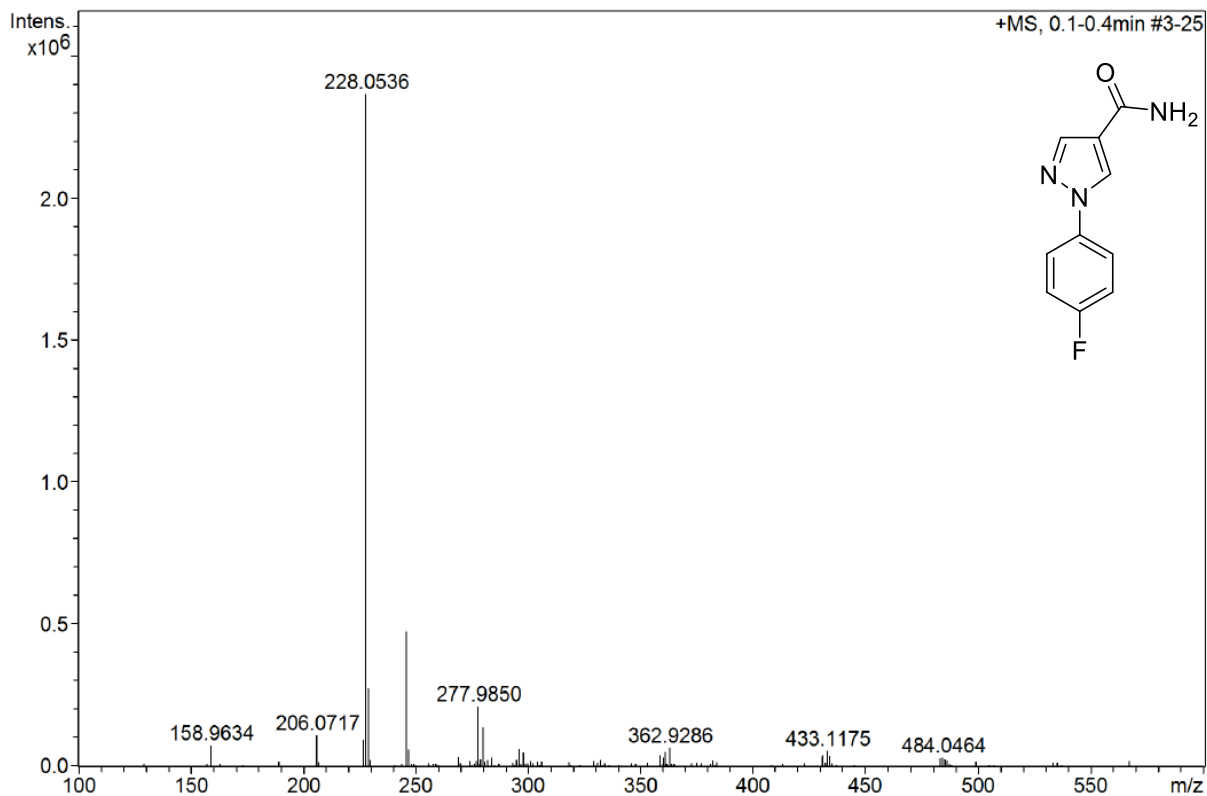

HRMS of compound **1h**

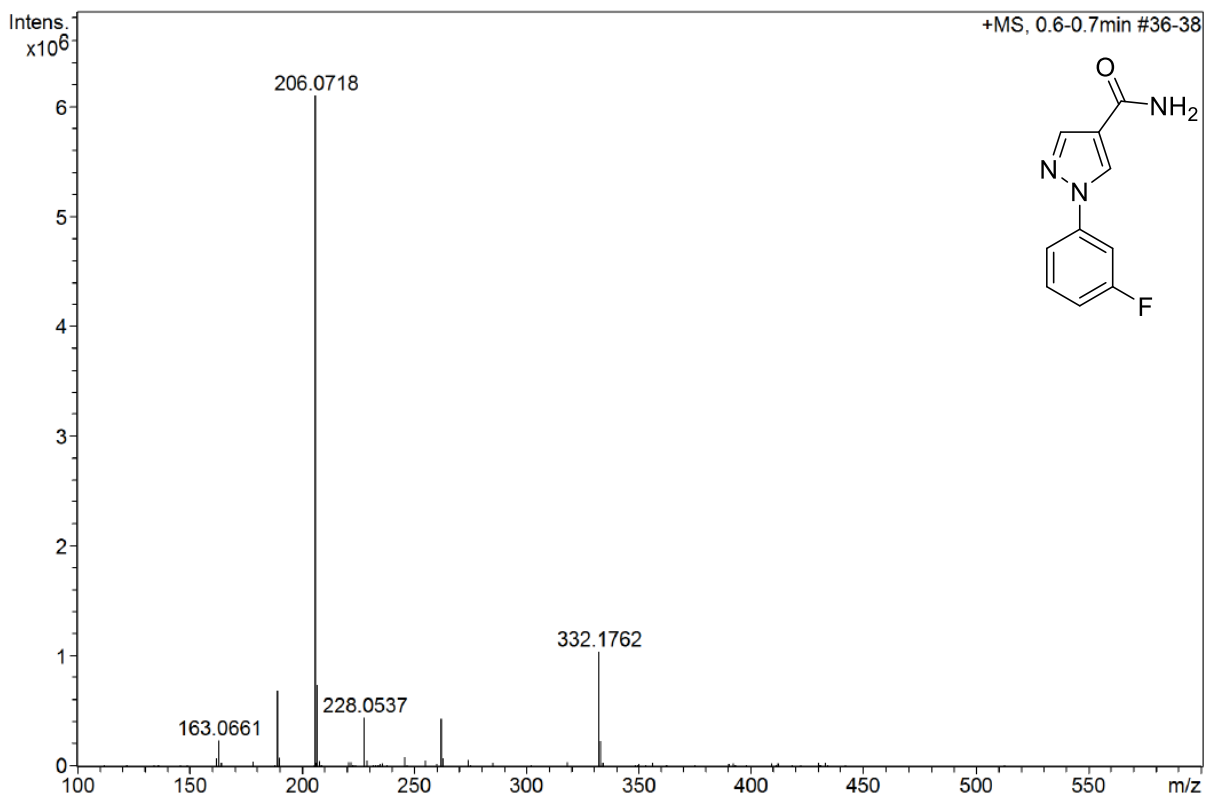



HRMS of compound **1i**

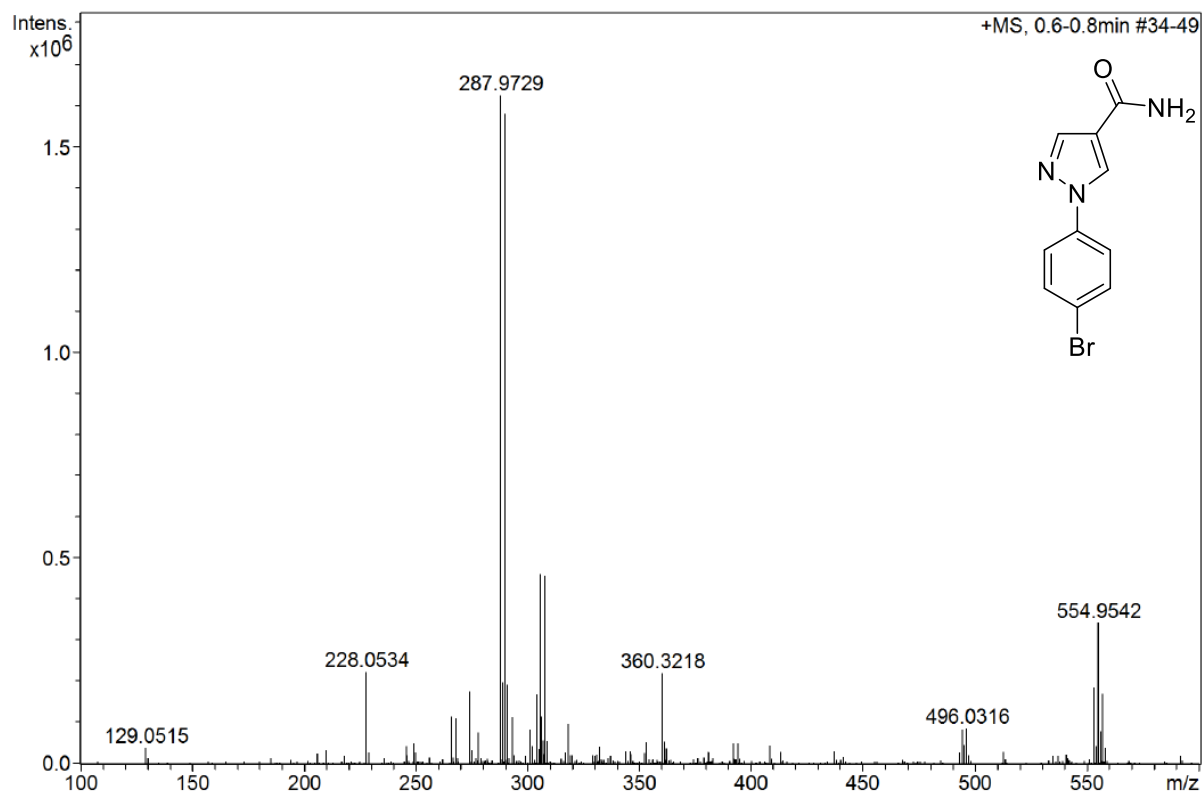

HRMS of compound **1j**

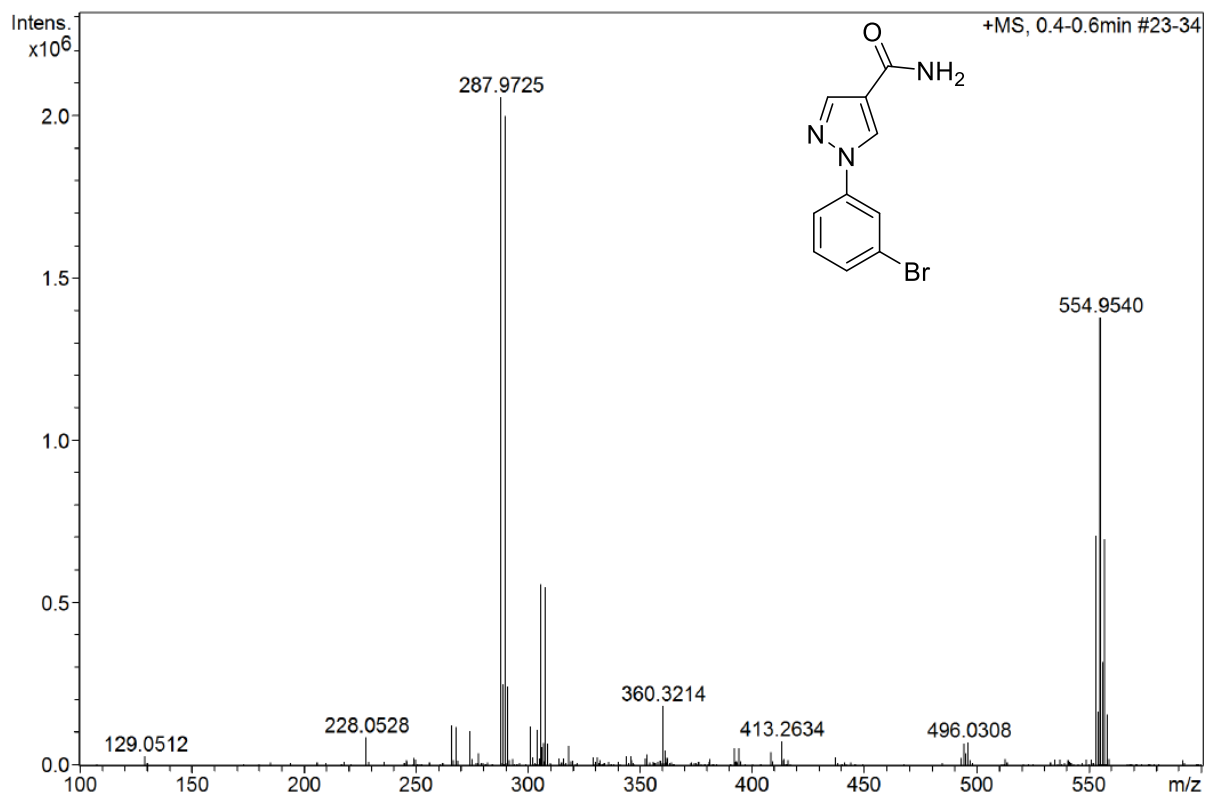

HRMS of compound **1k**

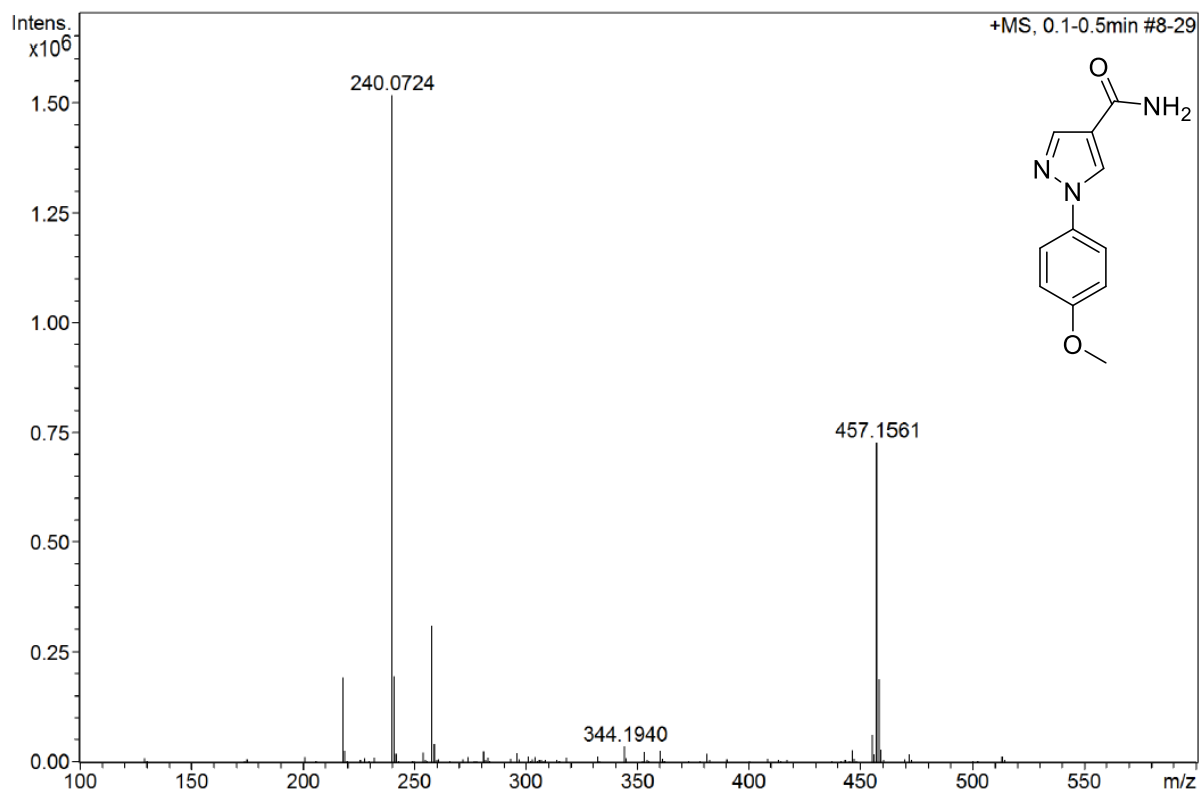

HRMS of compound **1l**

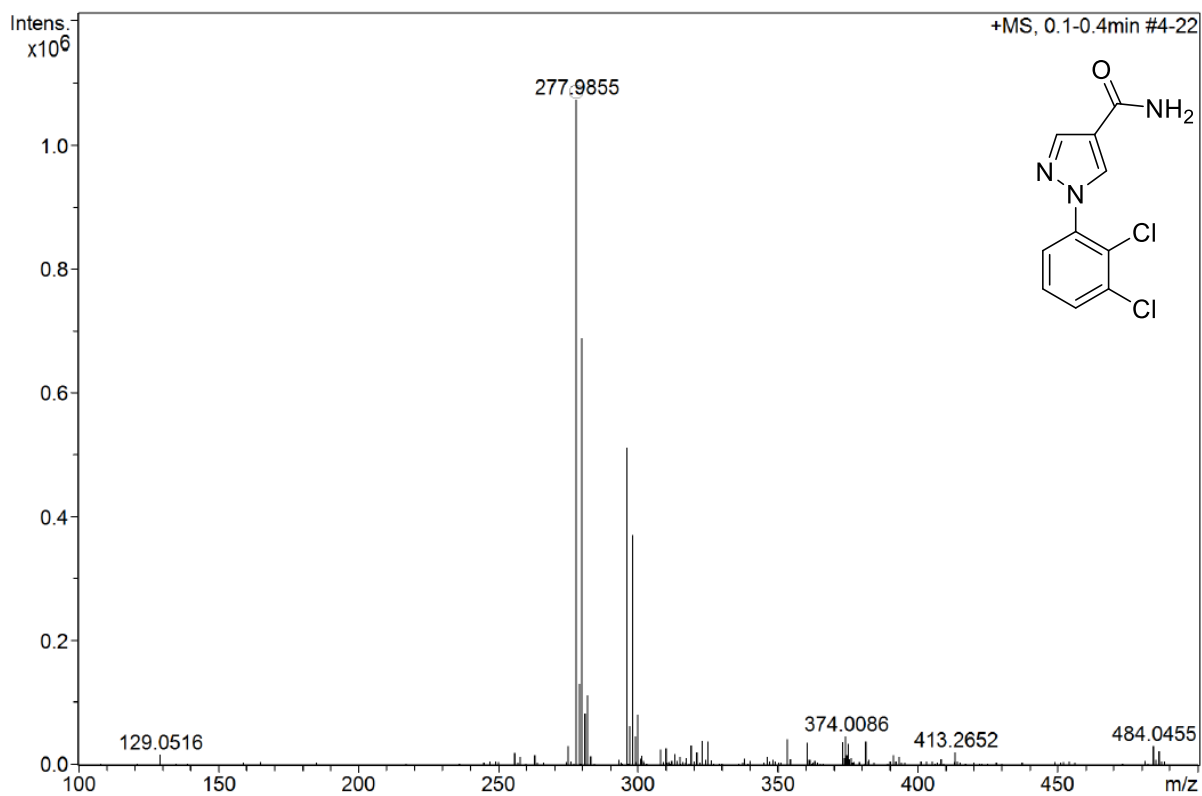

HRMS of compound **2a**

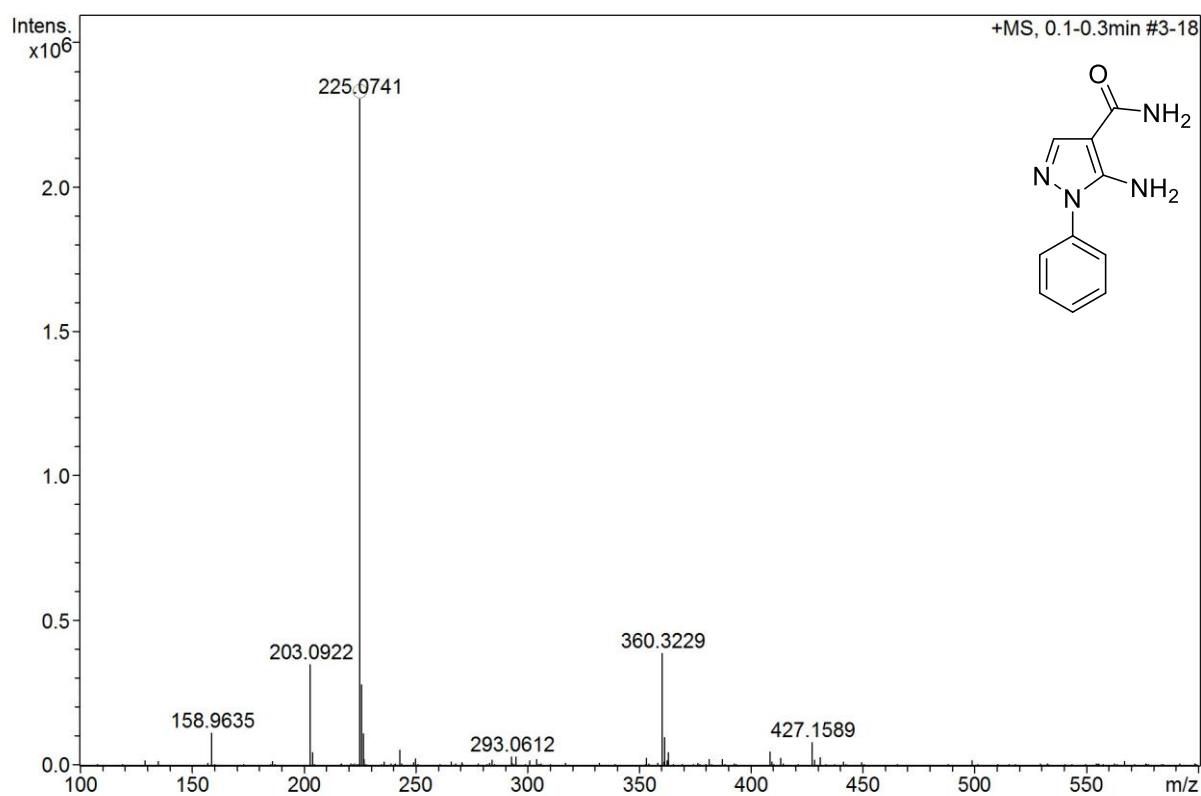

HRMS of compound **2b**

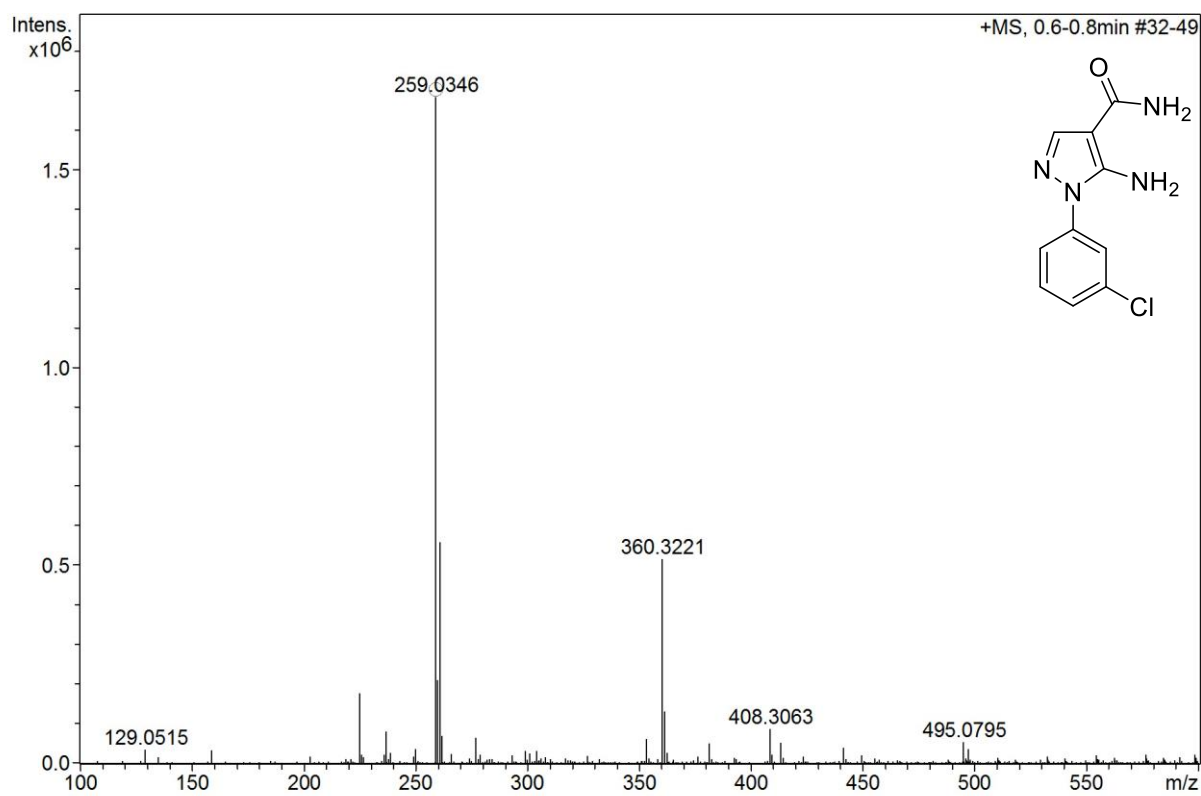

HRMS of compound **2c**

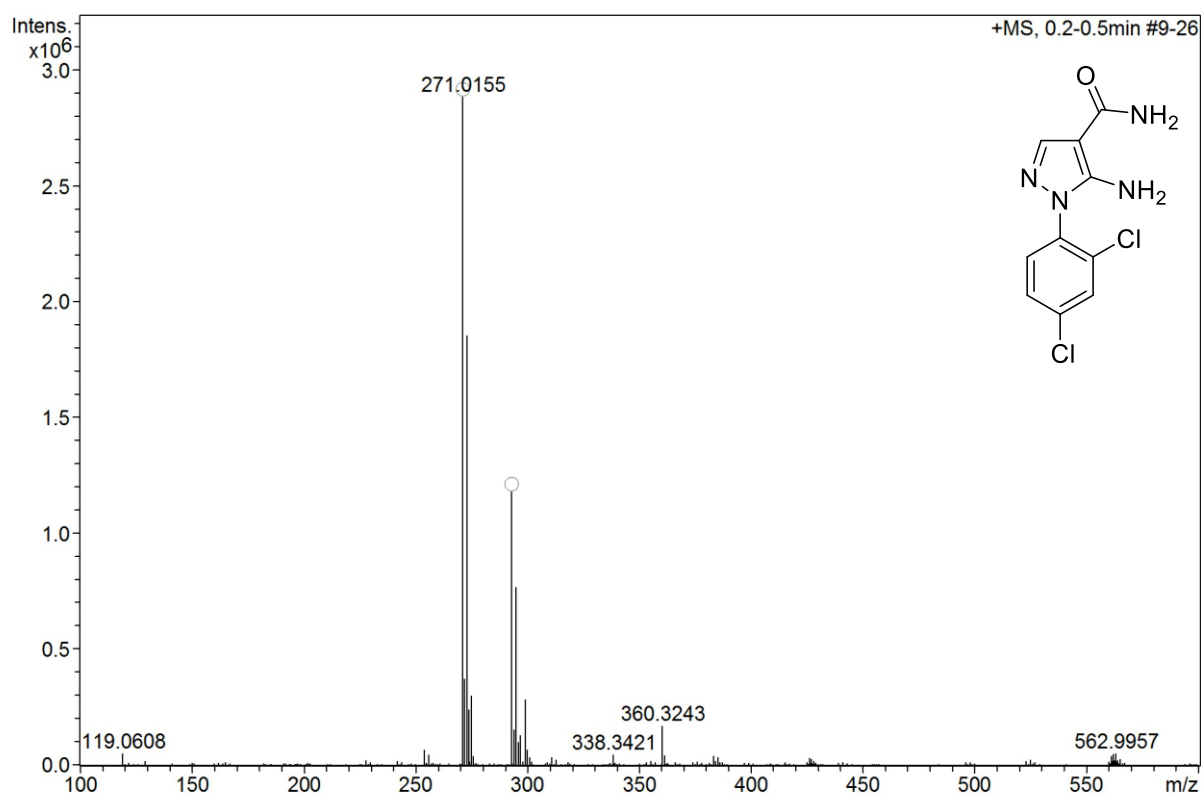

HRMS of compound **2d**

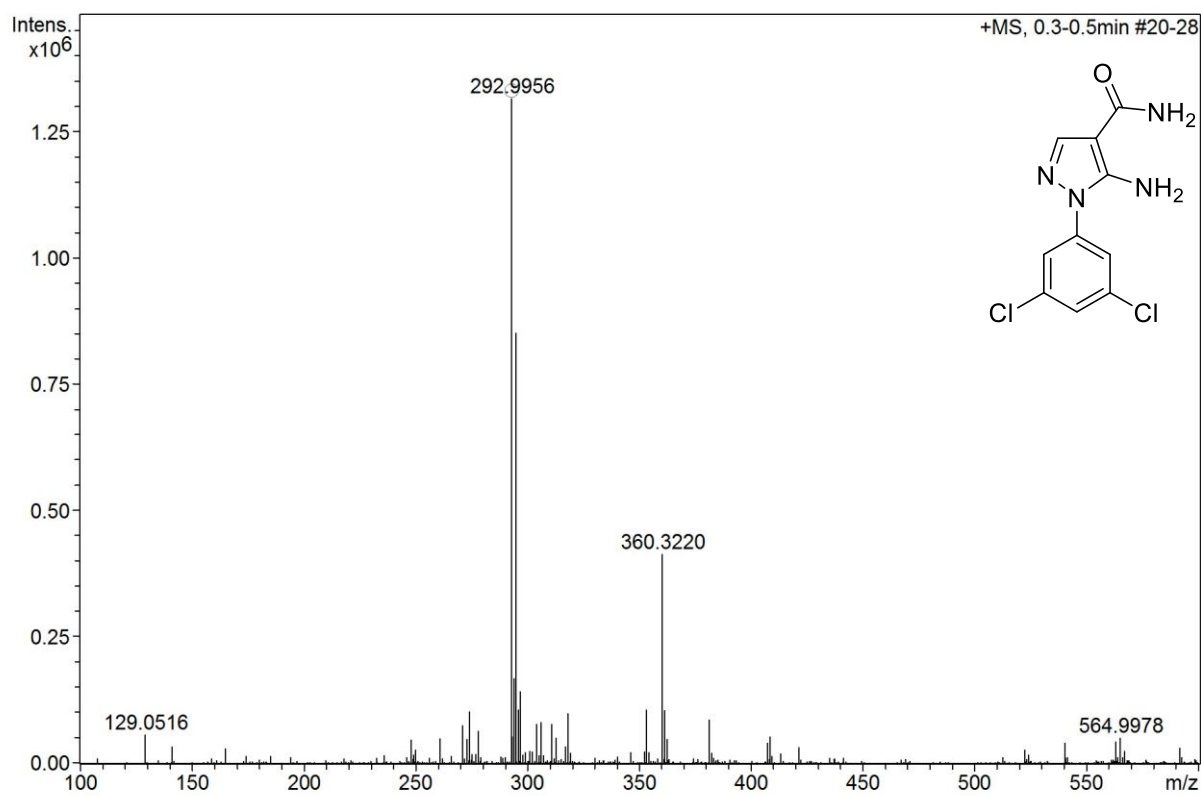

HRMS of compound **2e**

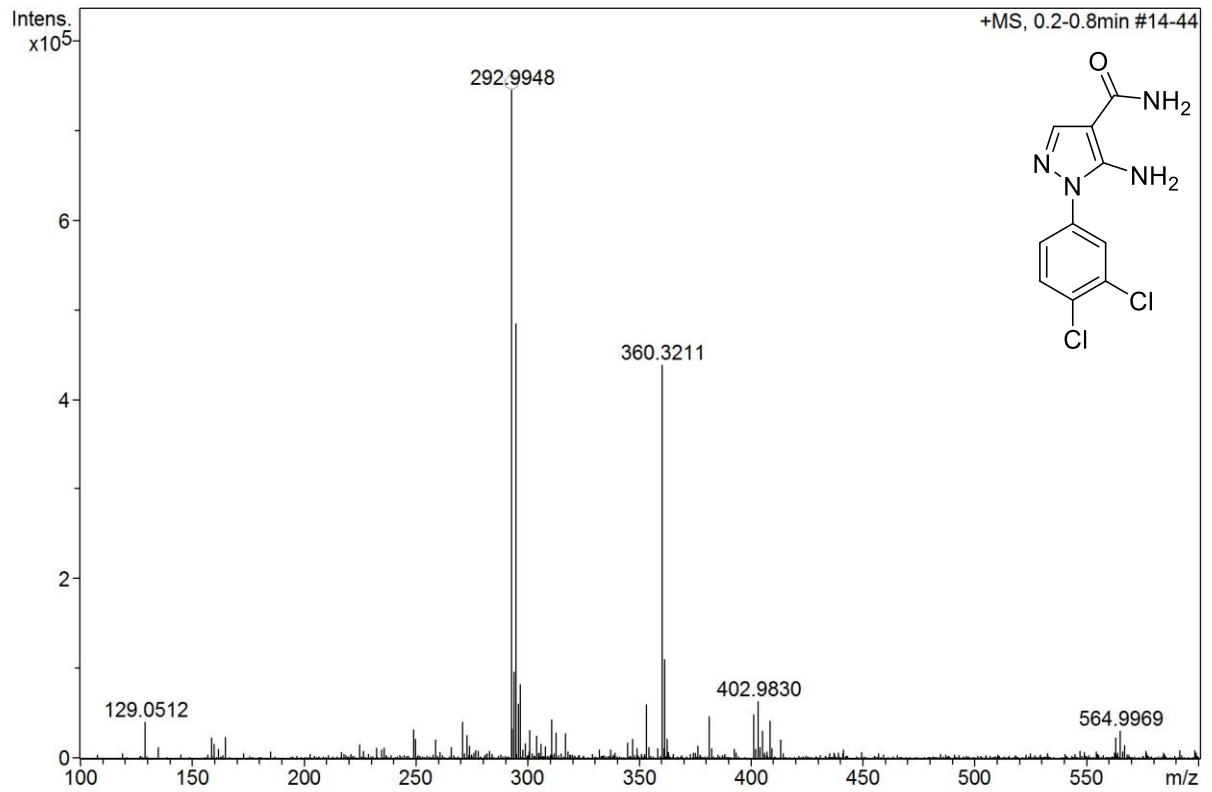

HRMS of compound **2f**

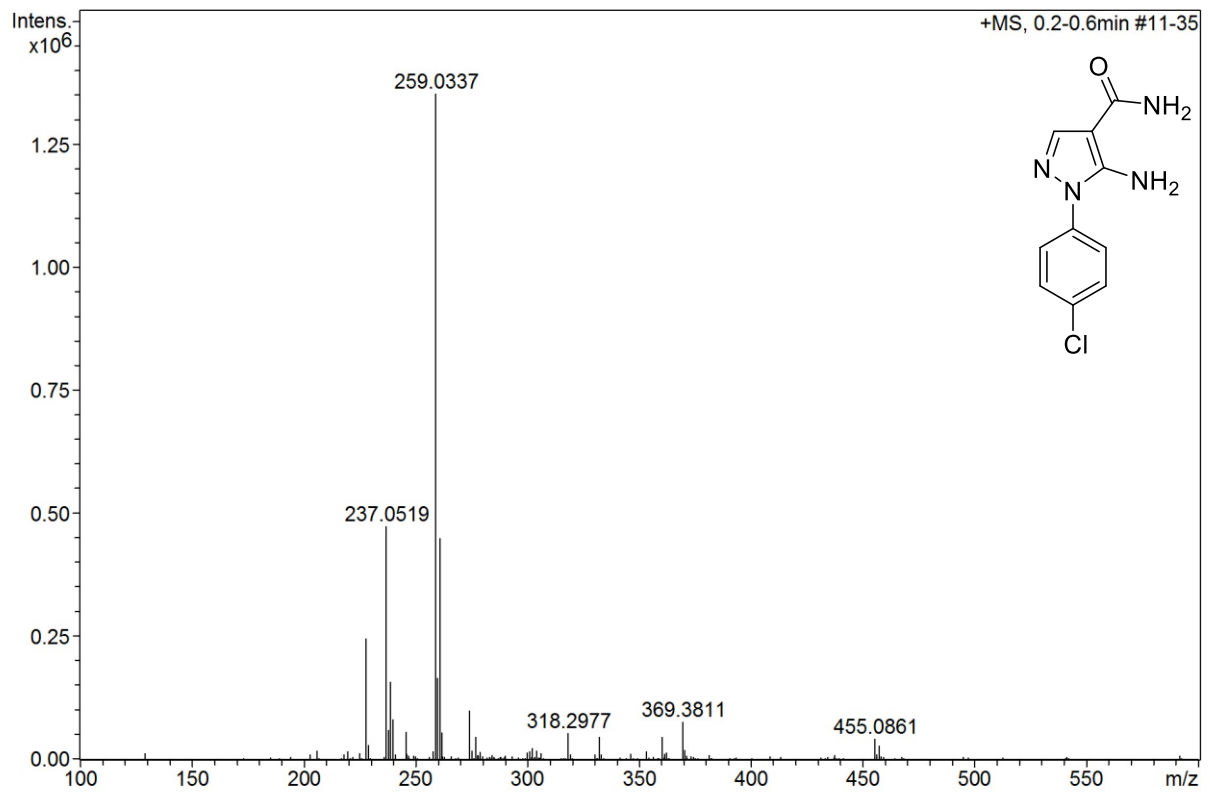

HRMS of compound **2g**

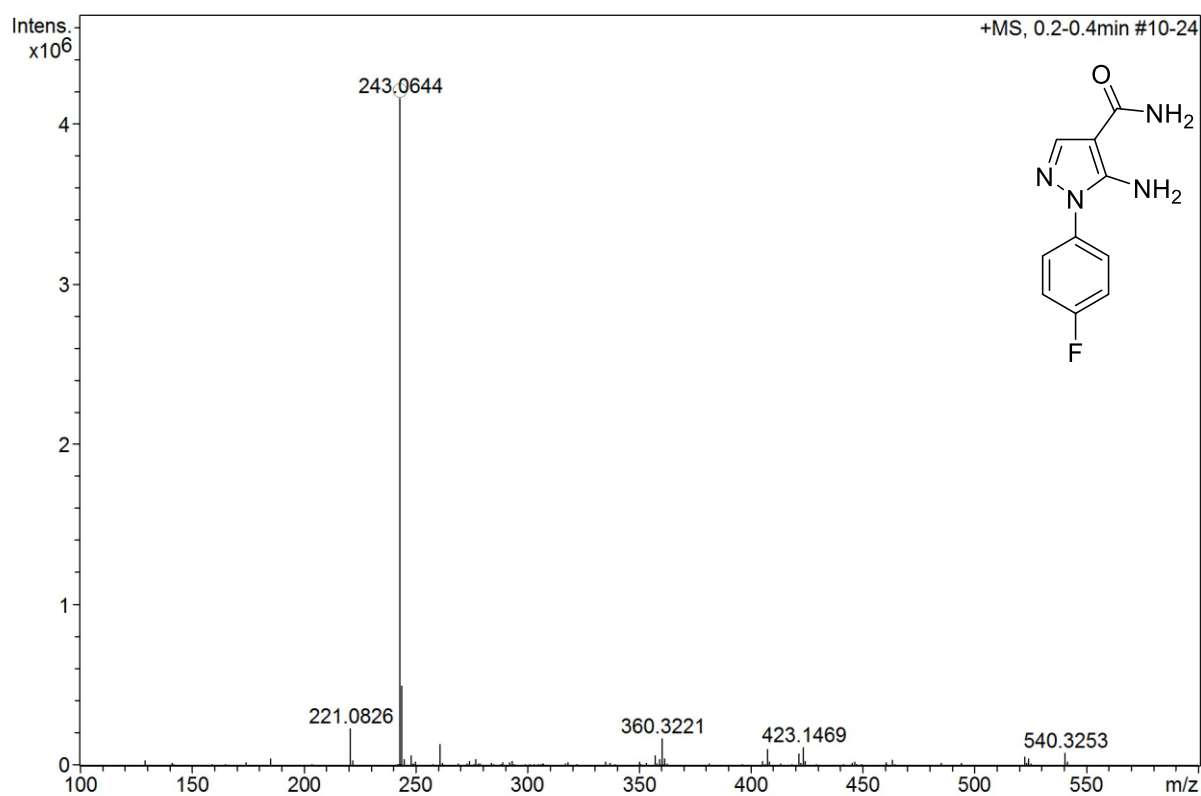

HRMS of compound **2h**

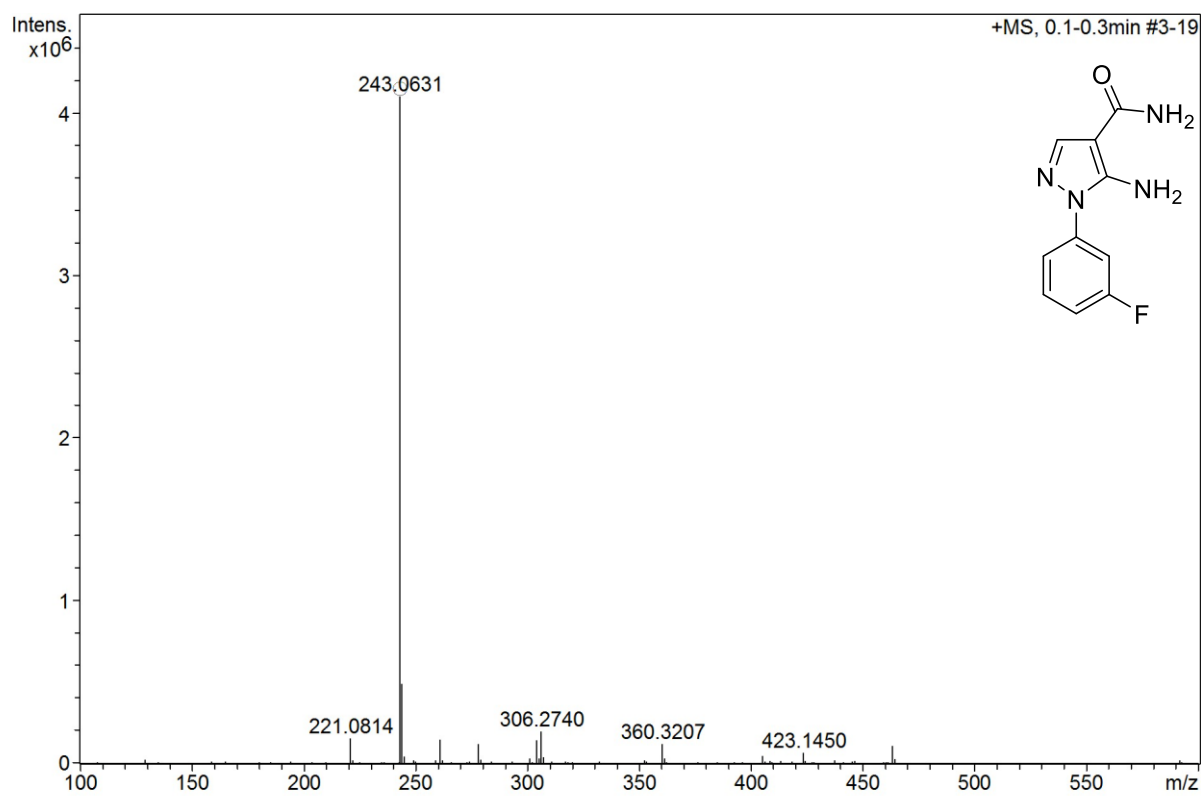

HRMS of compound **2i**

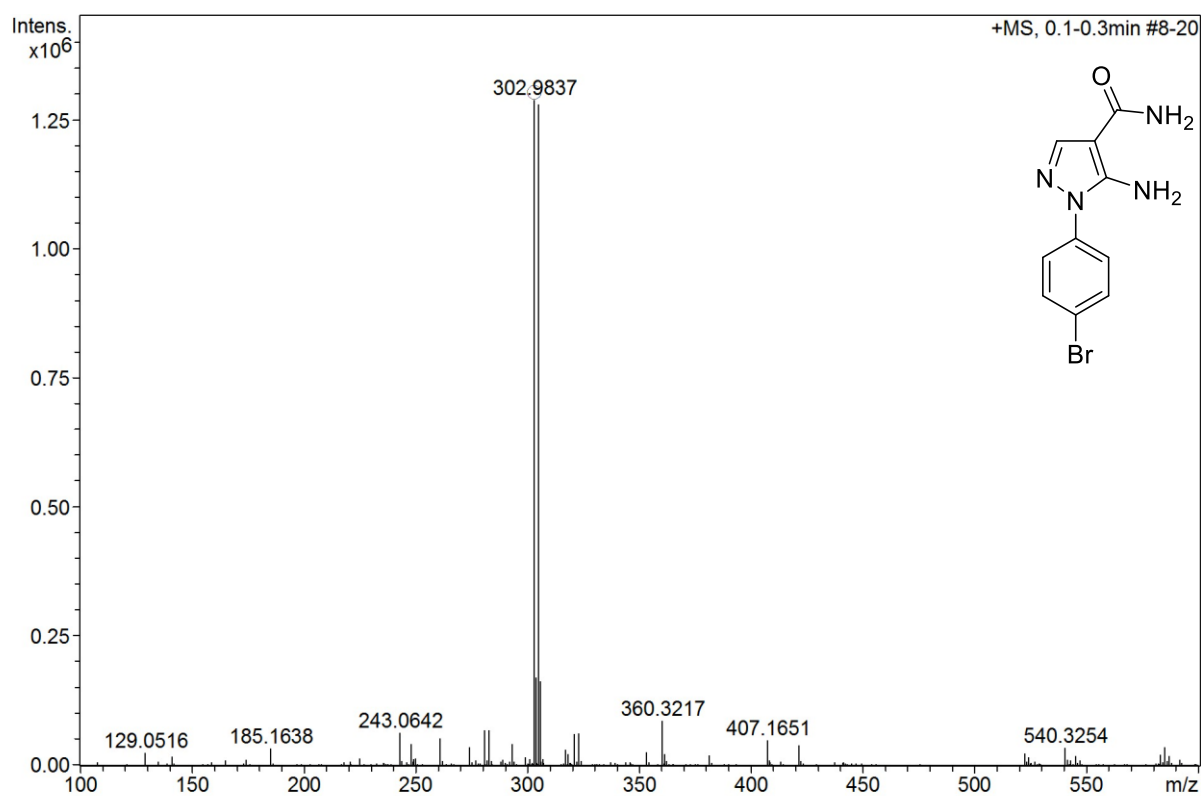

HRMS of compound **2j**

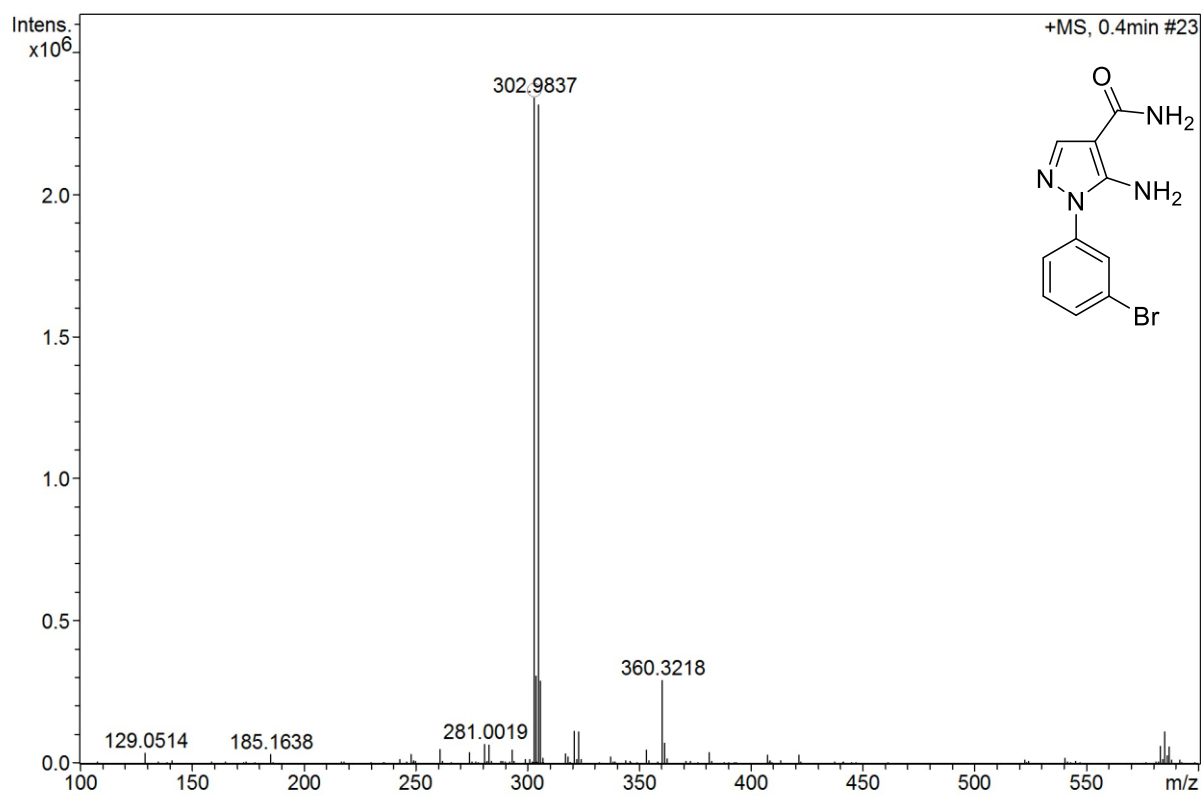

HRMS of compound **2k**

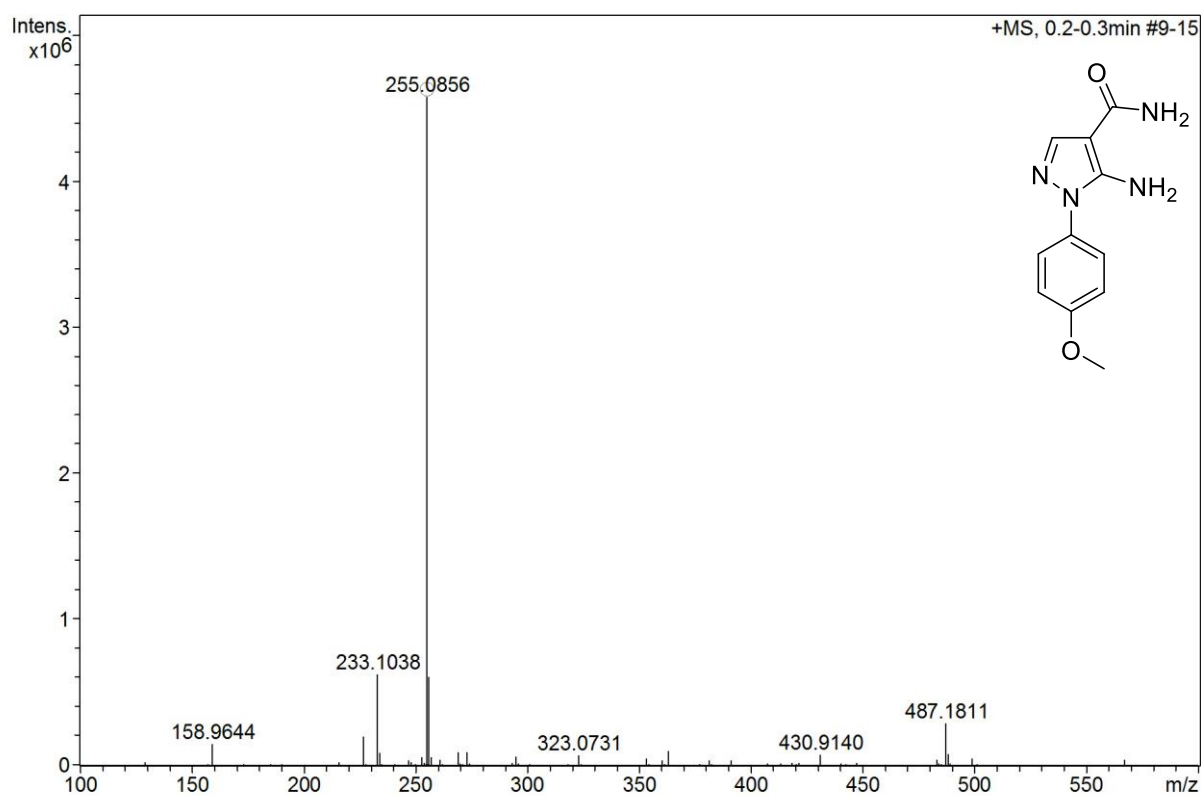

HRMS of compound **2l**

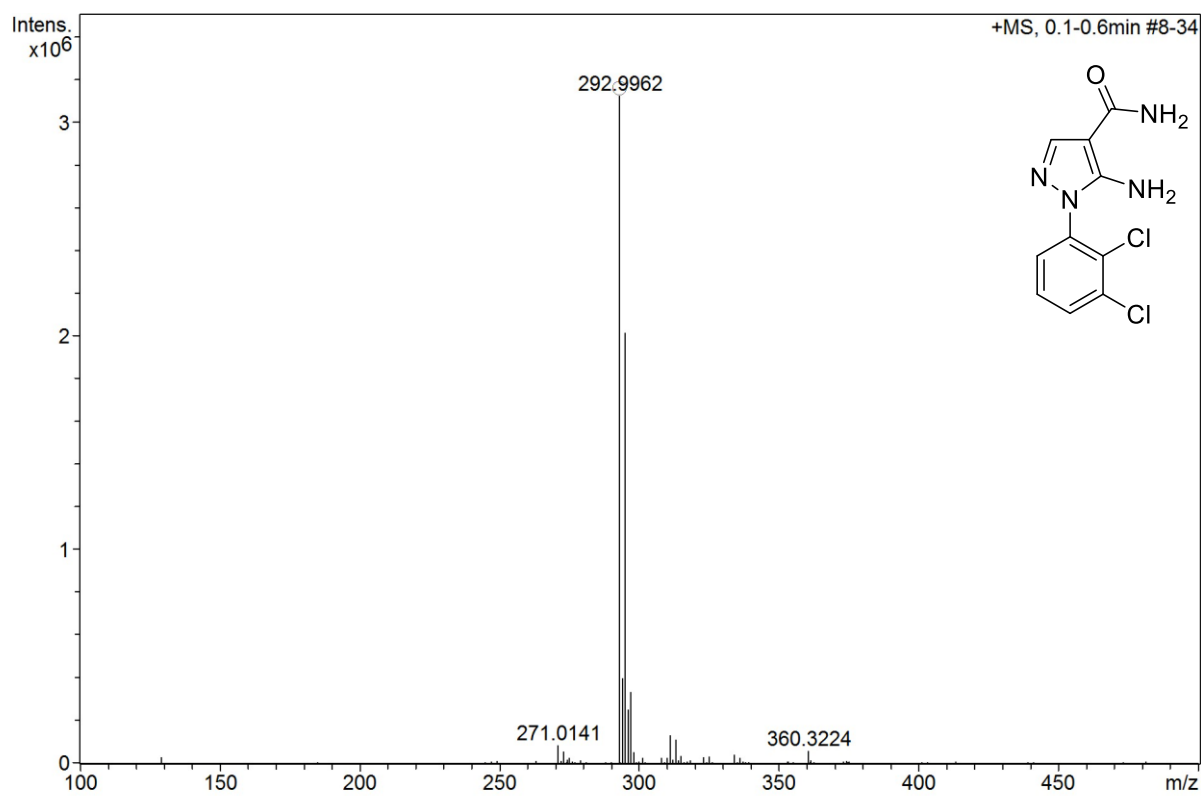



HRMS of compound **3a**

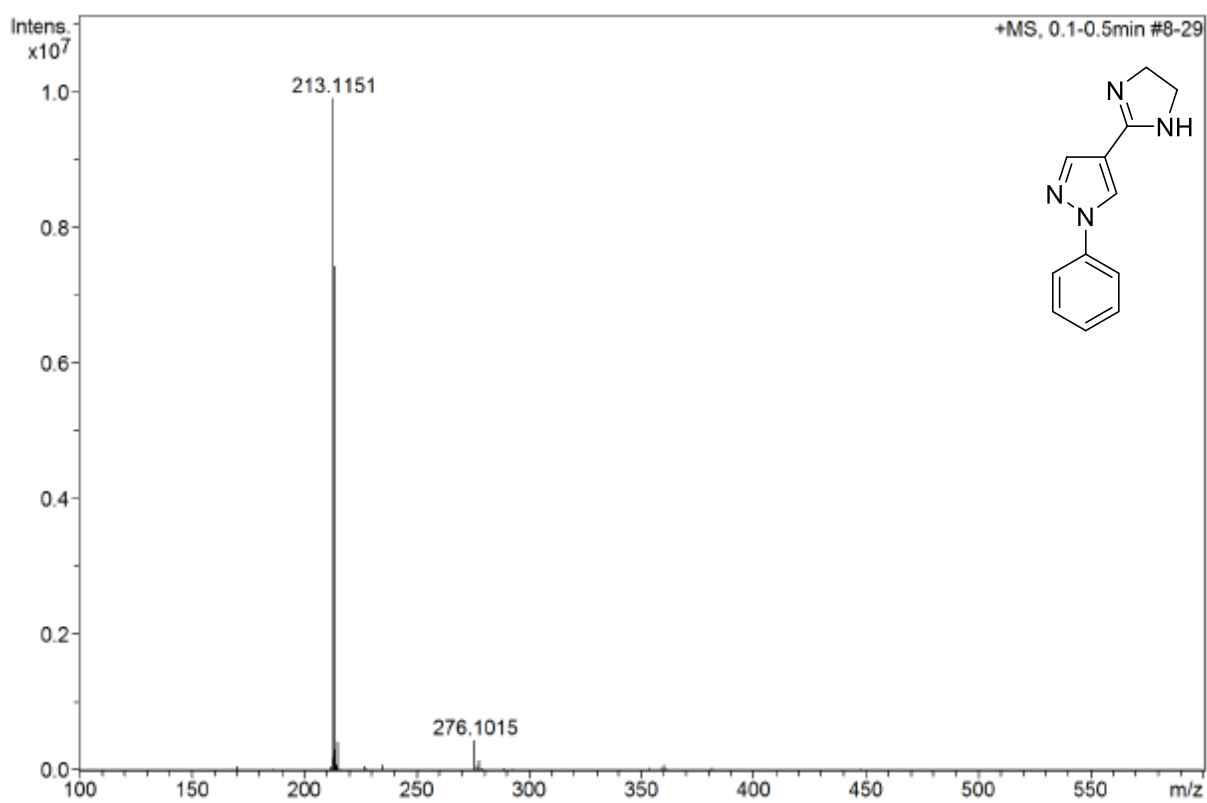

HRMS of compound **3b**

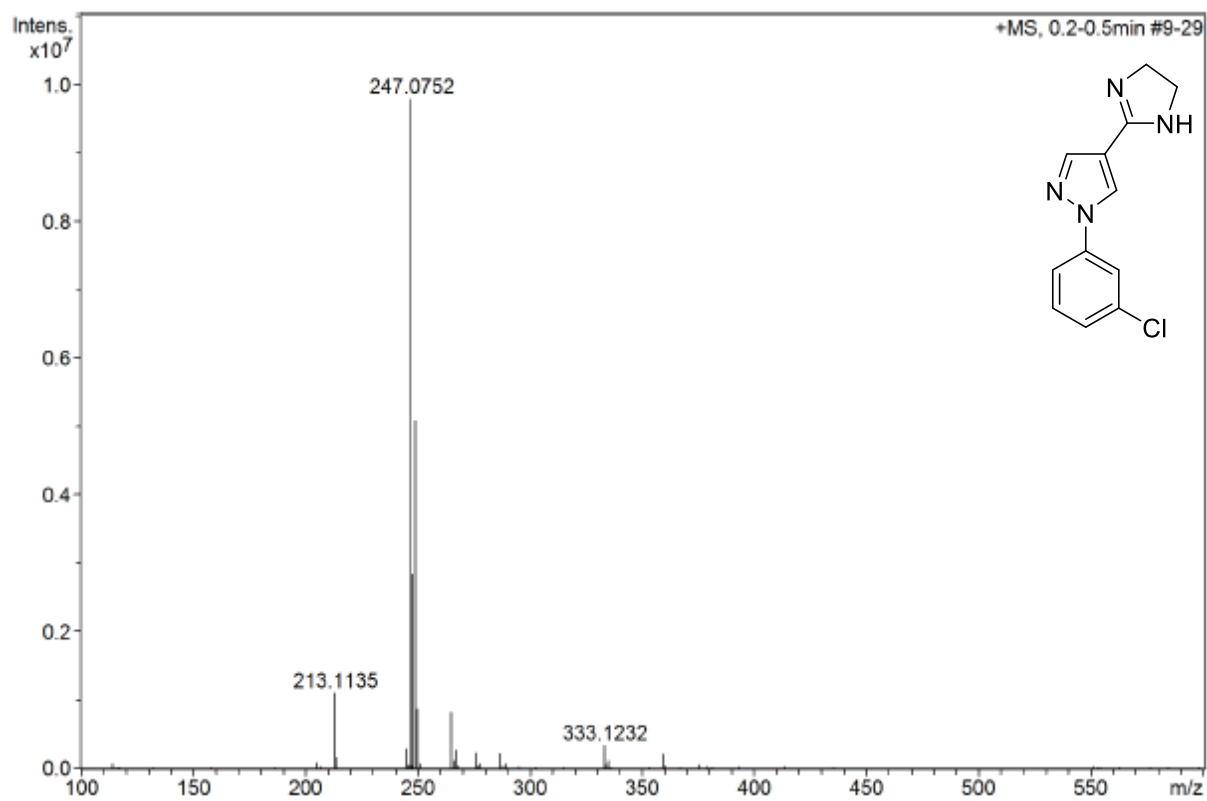

HRMS of compound **3c**

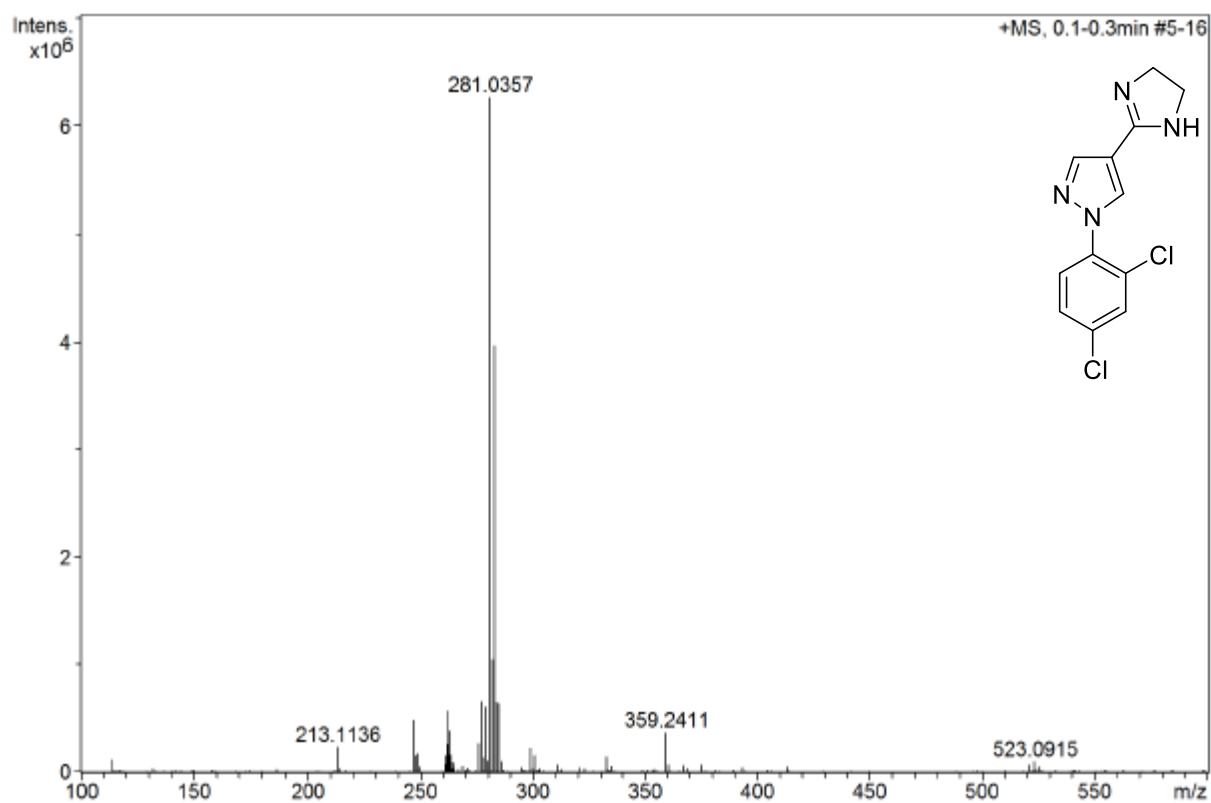

HRMS of compound **3d**

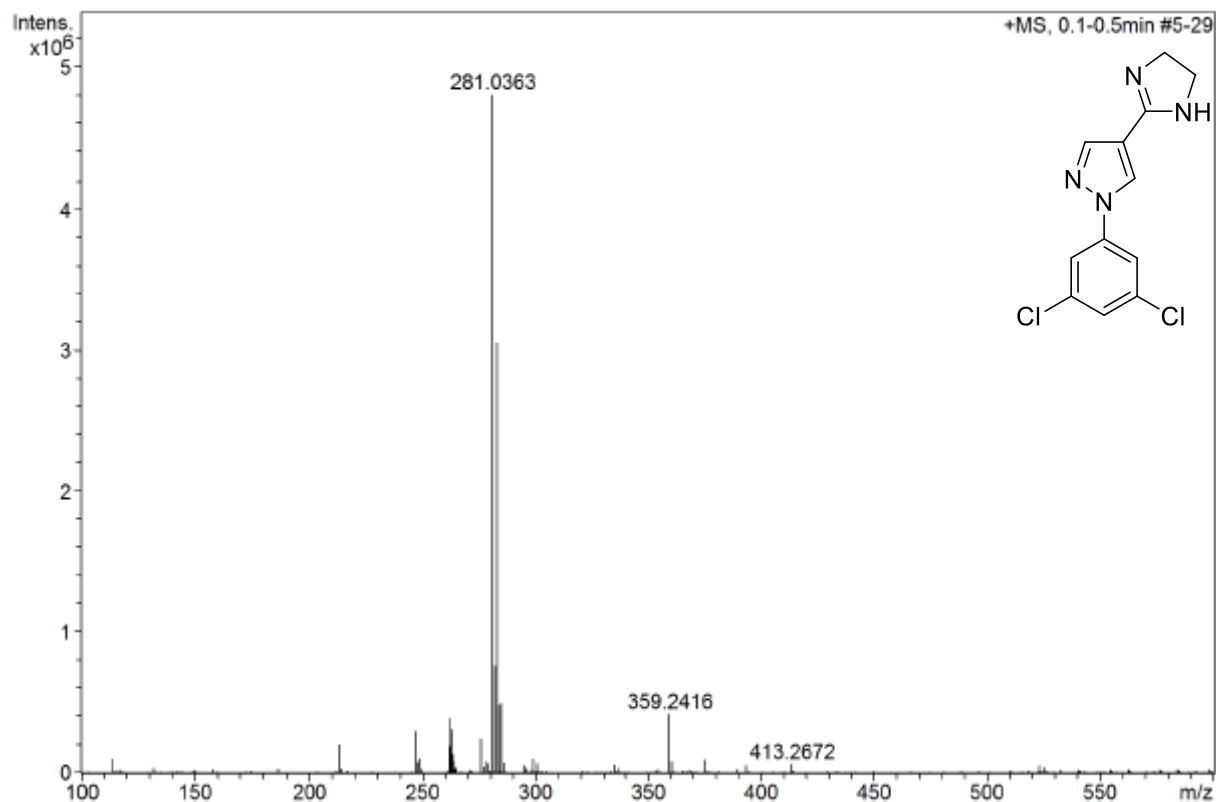

HRMS of compound **3e**

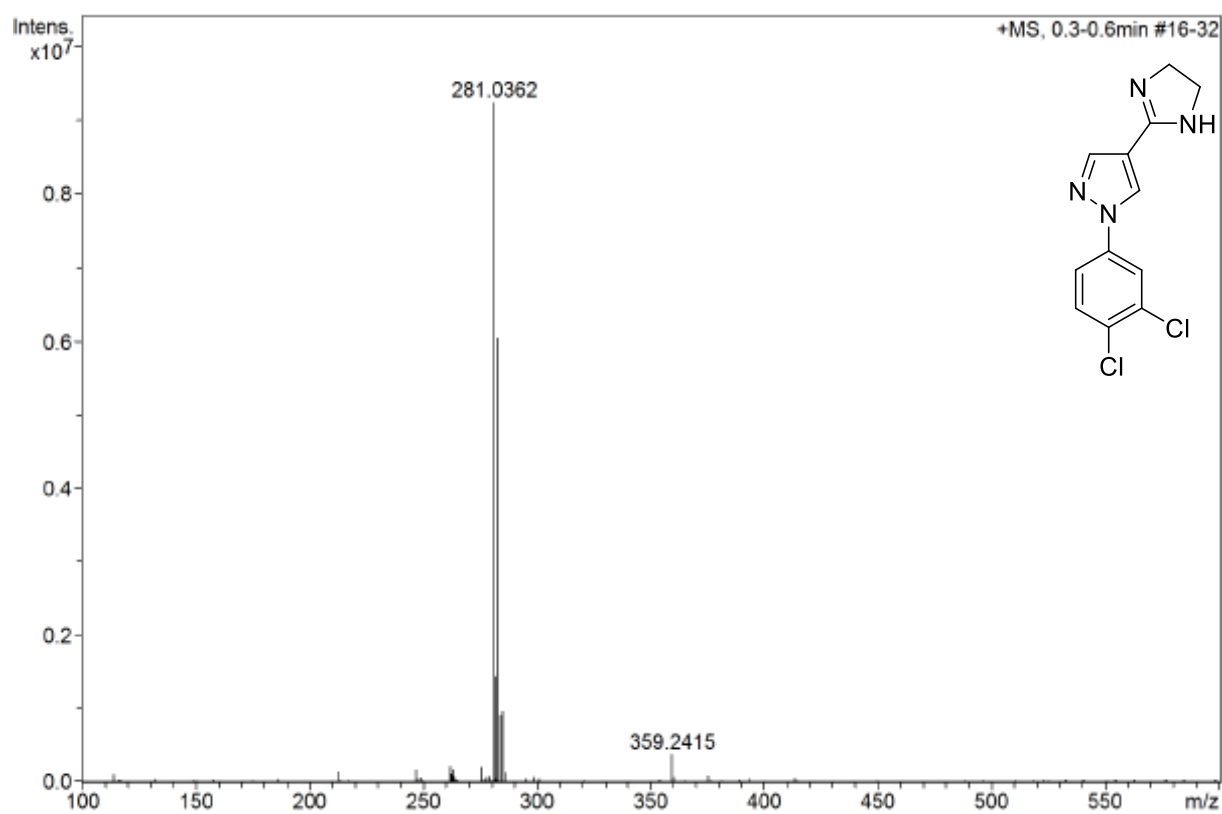

HRMS of compound **3f**

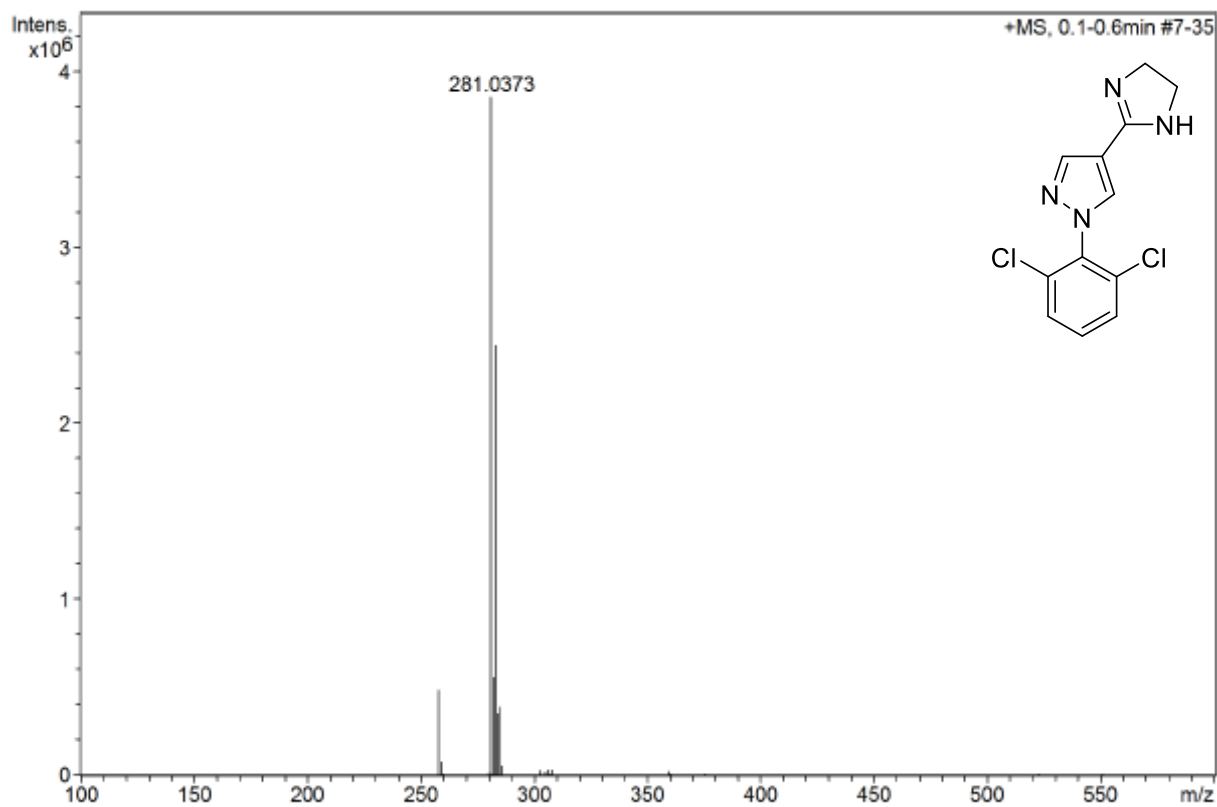

HRMS of compound **3g**

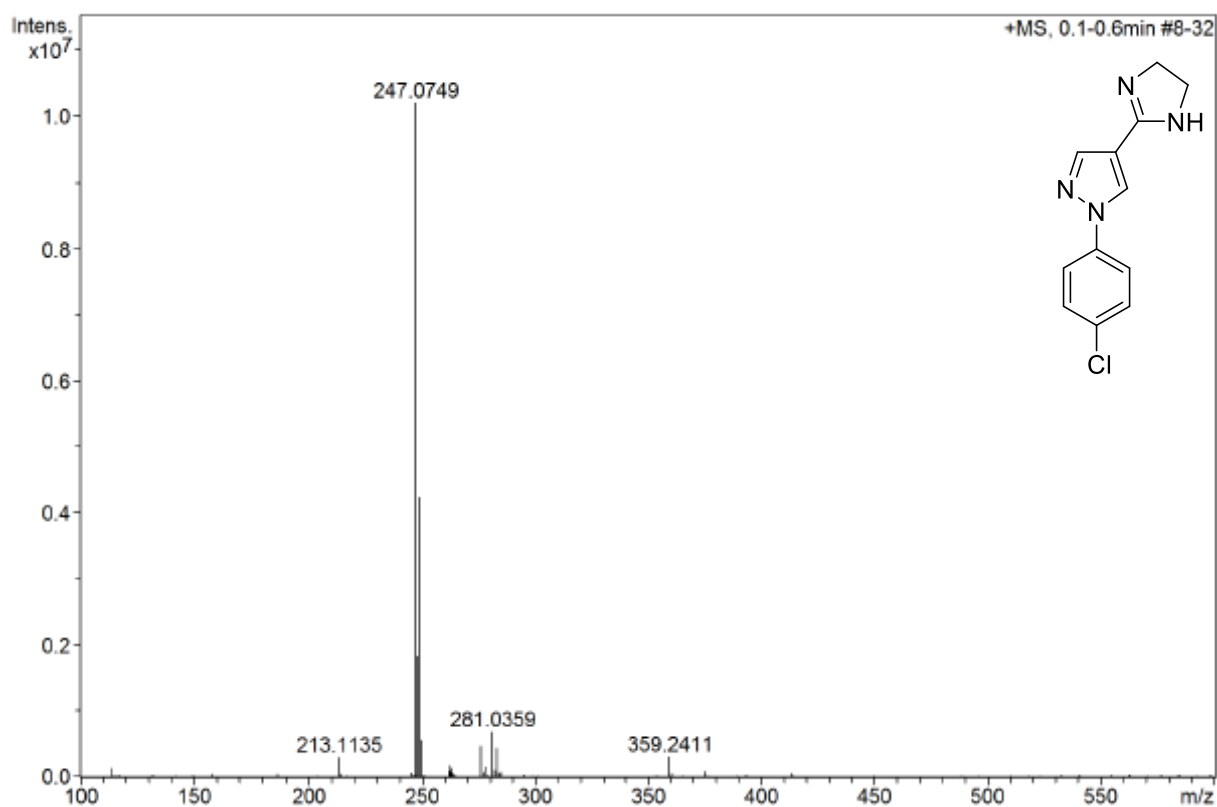

HRMS of compound **3h**

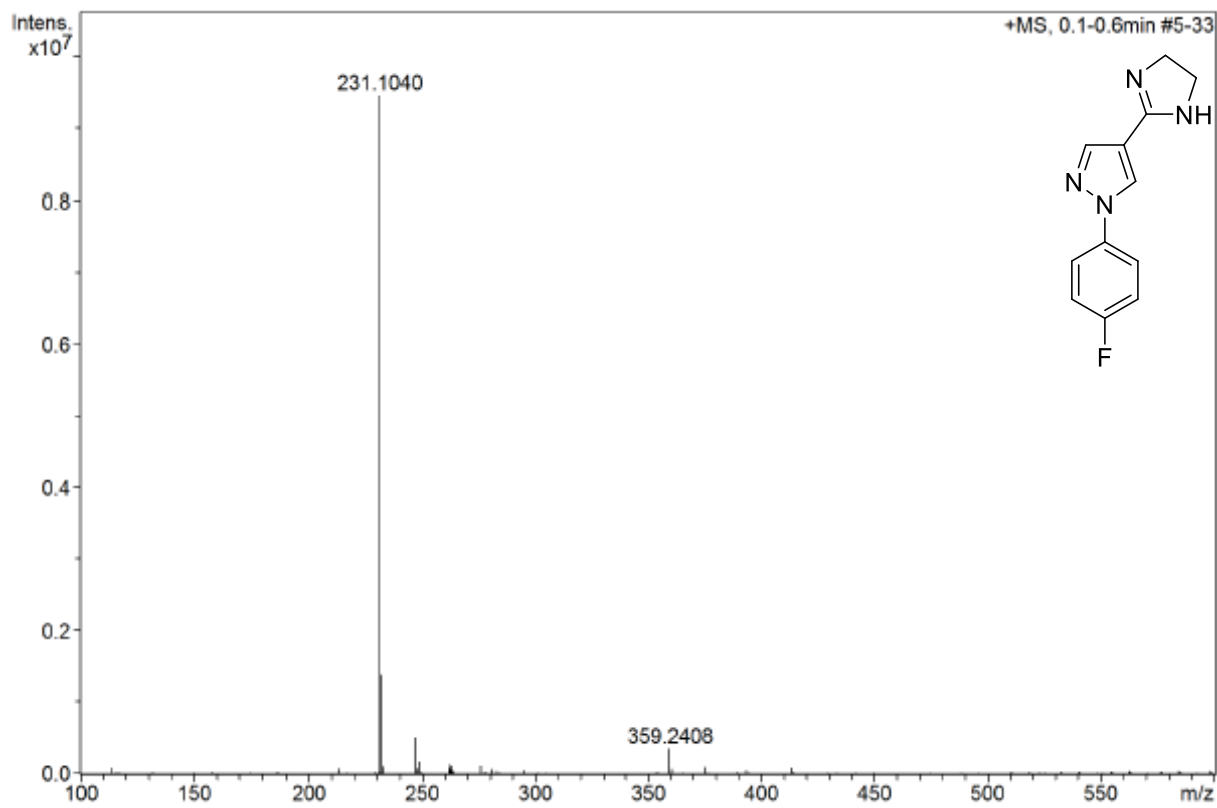

HRMS of compound **3i**

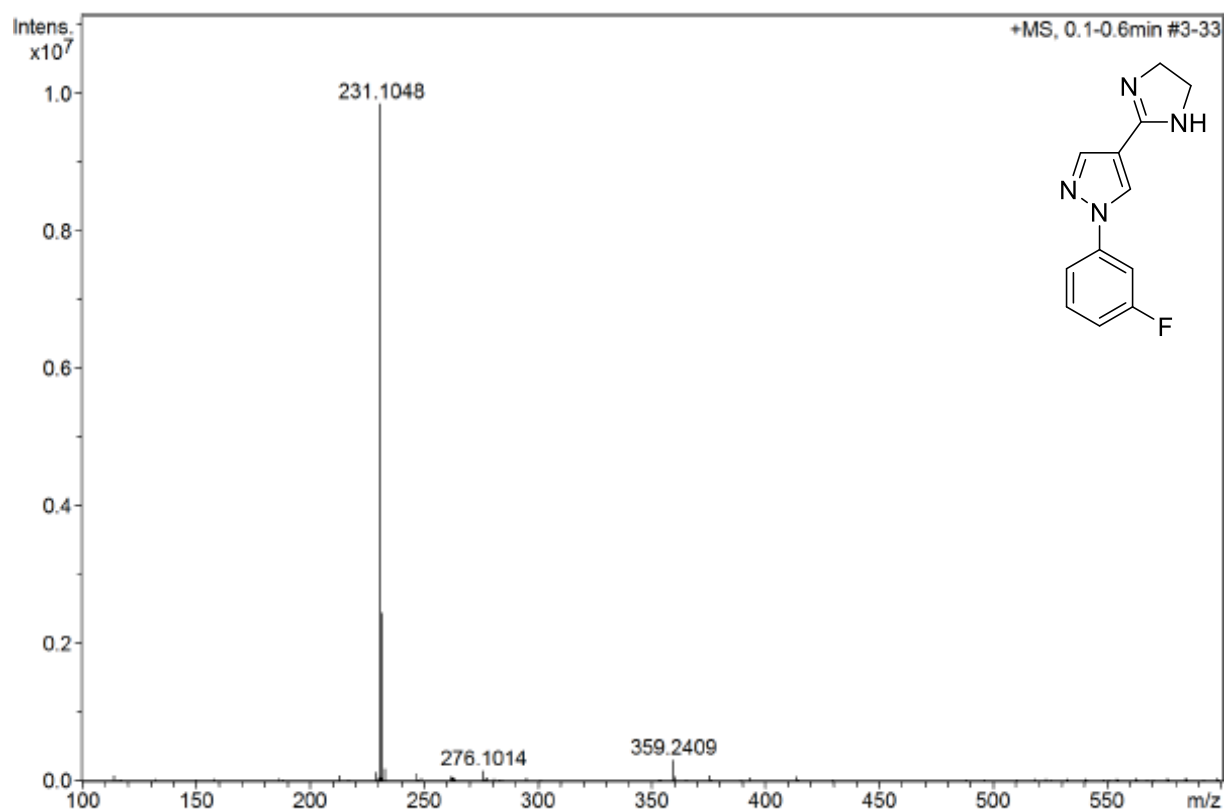

HRMS of compound **3j**

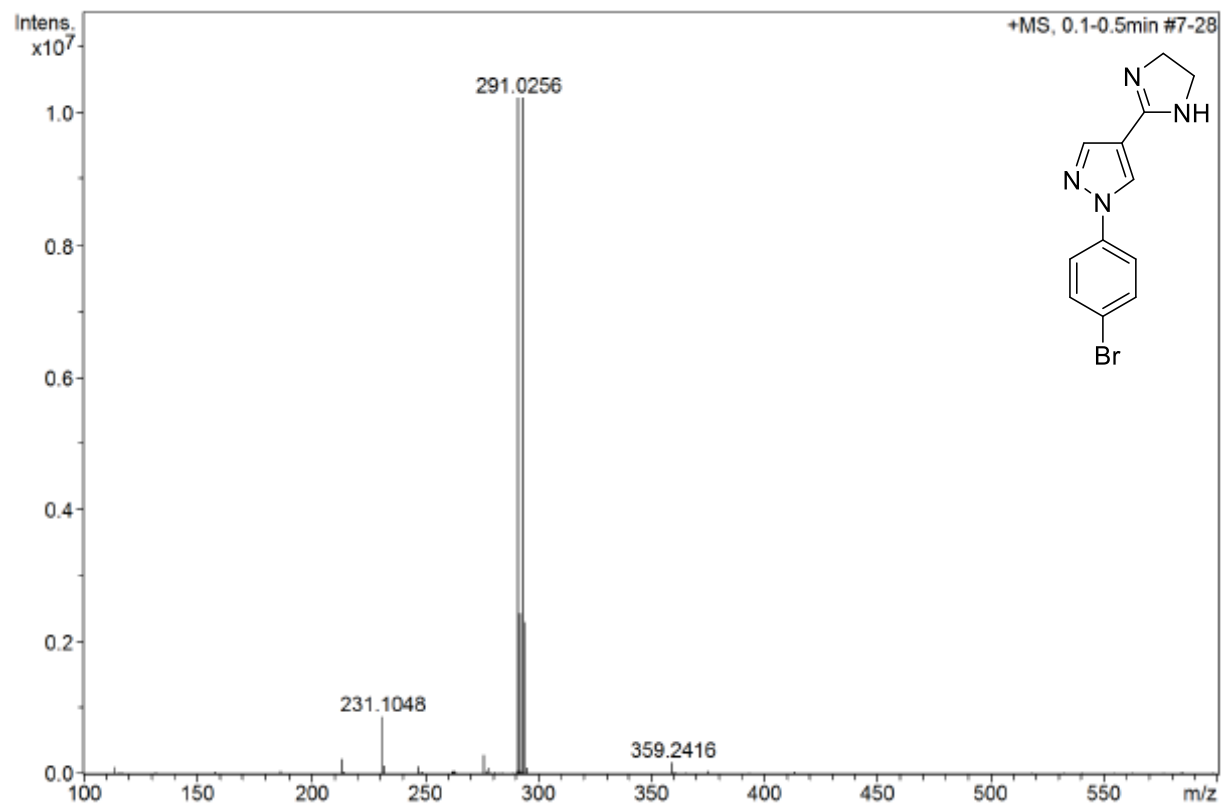

HRMS of compound **3k**

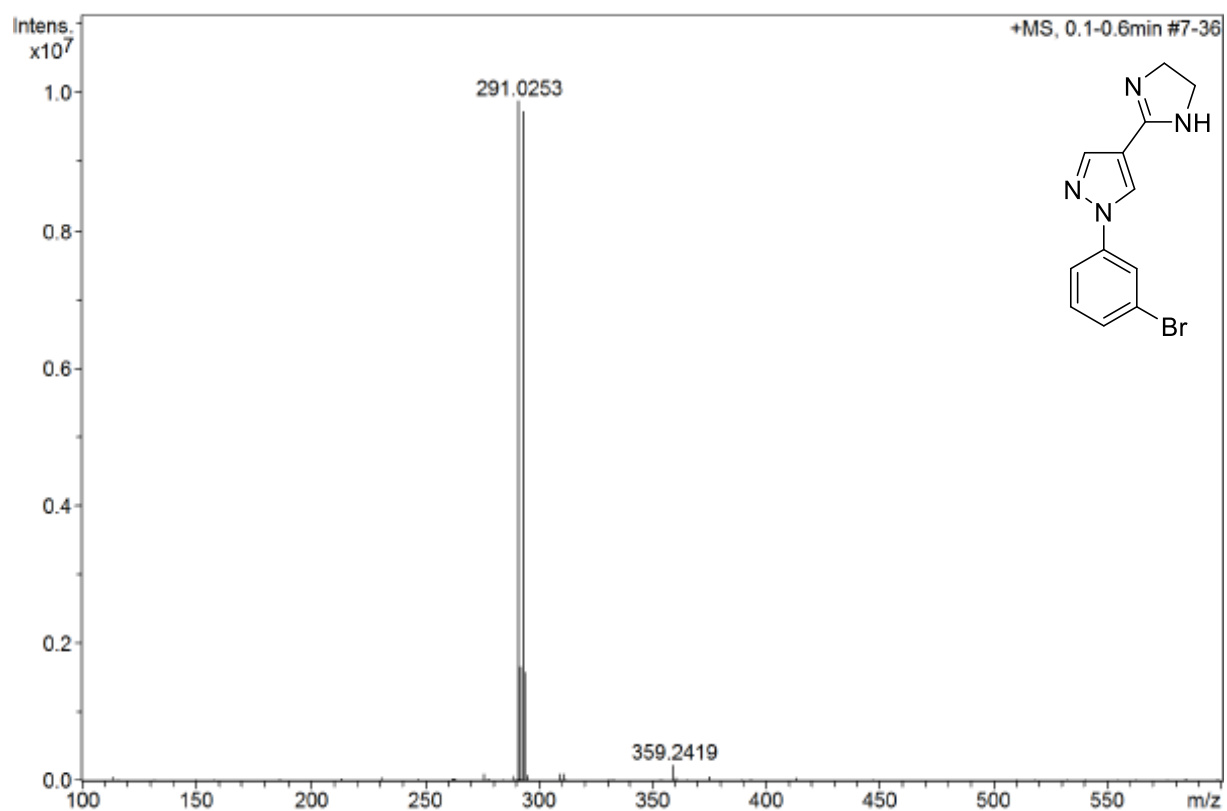

HRMS of compound **3l**

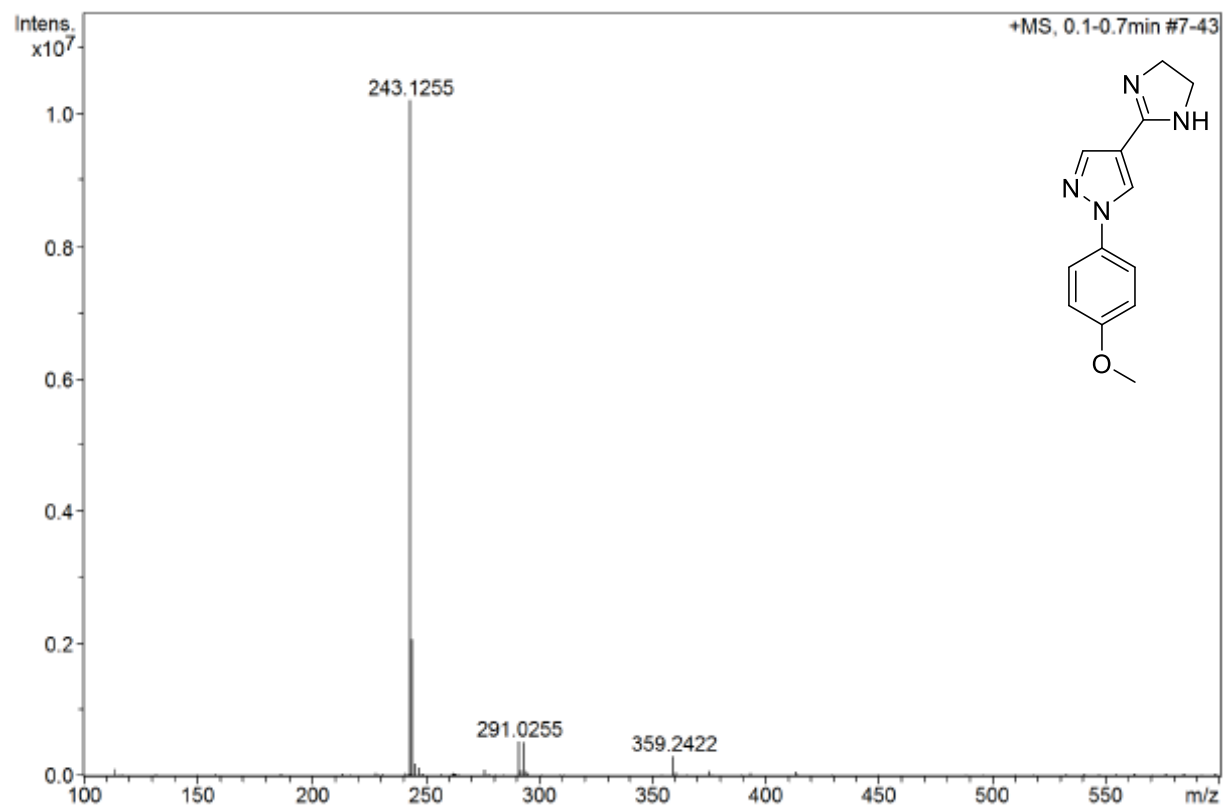

HRMS of compound **3m**

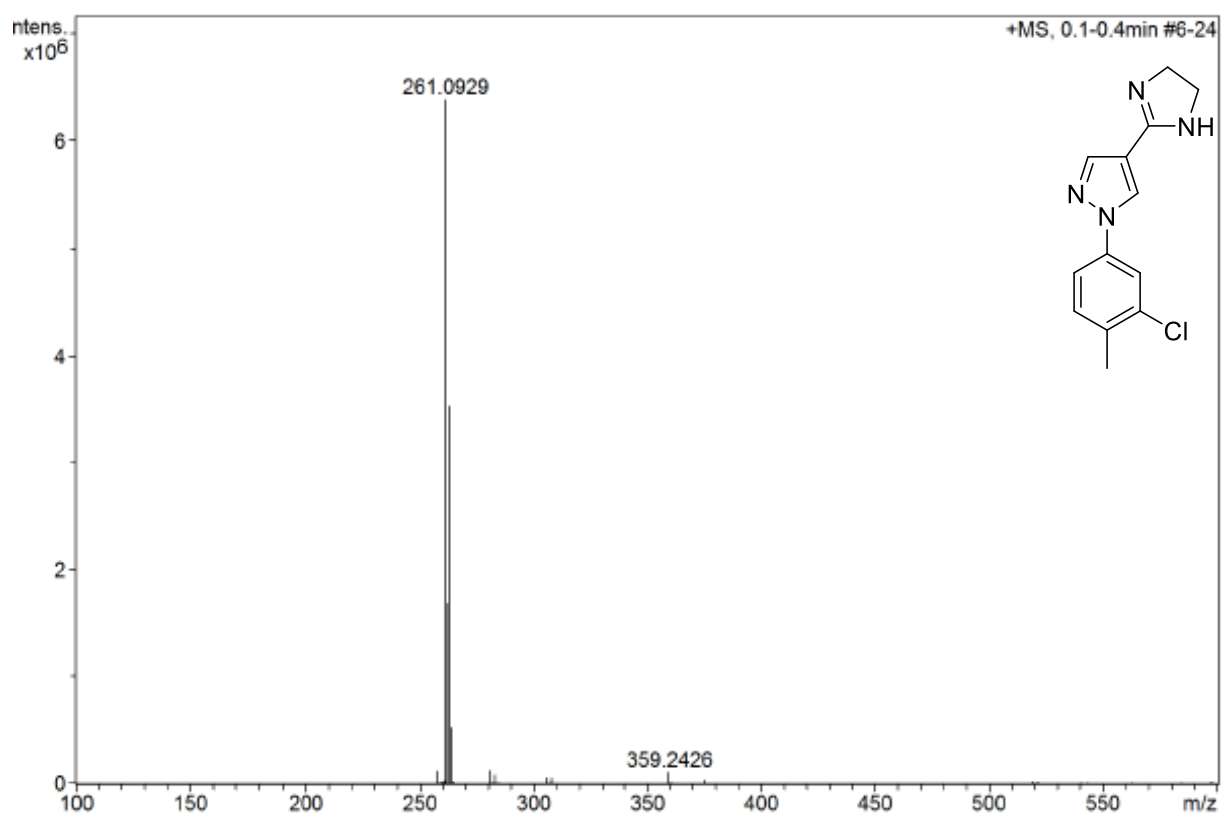

HRMS of compound **3n**

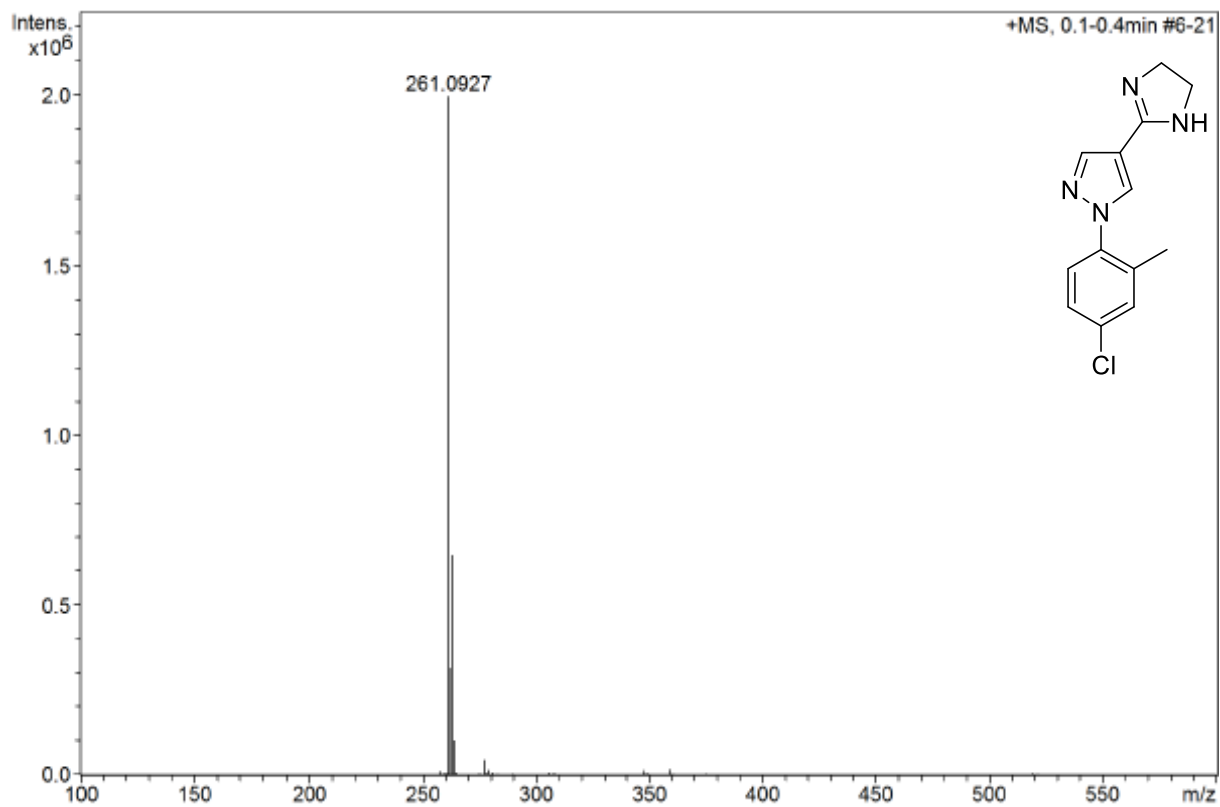

### HRMS of compound **4a**

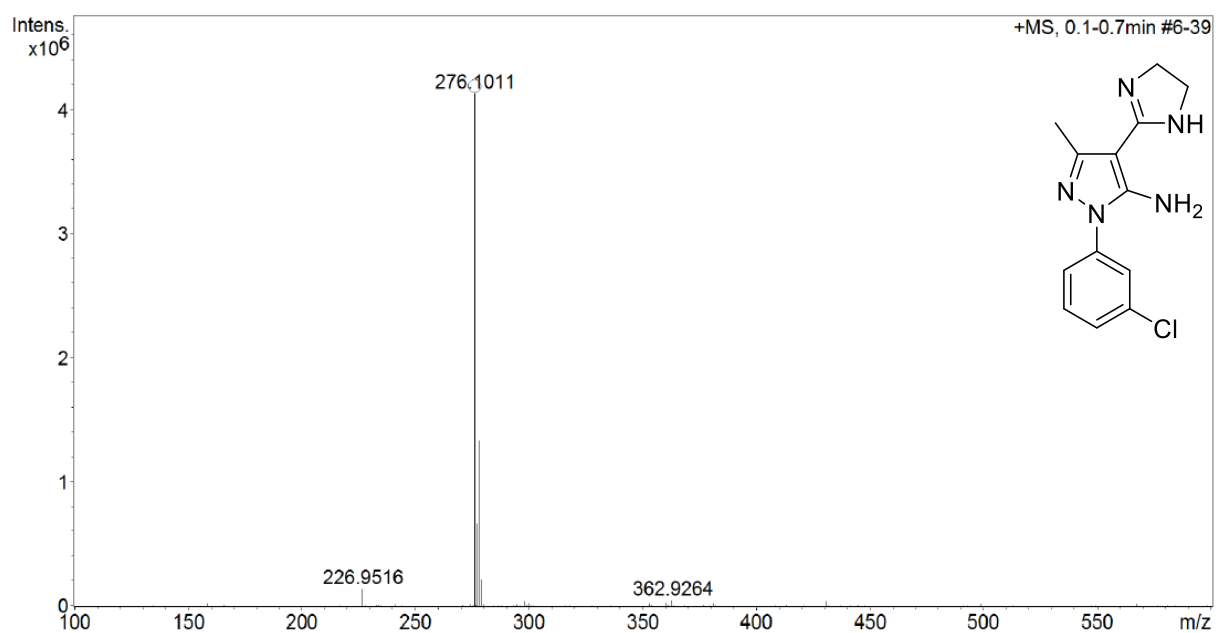

### HRMS of compound **4b**

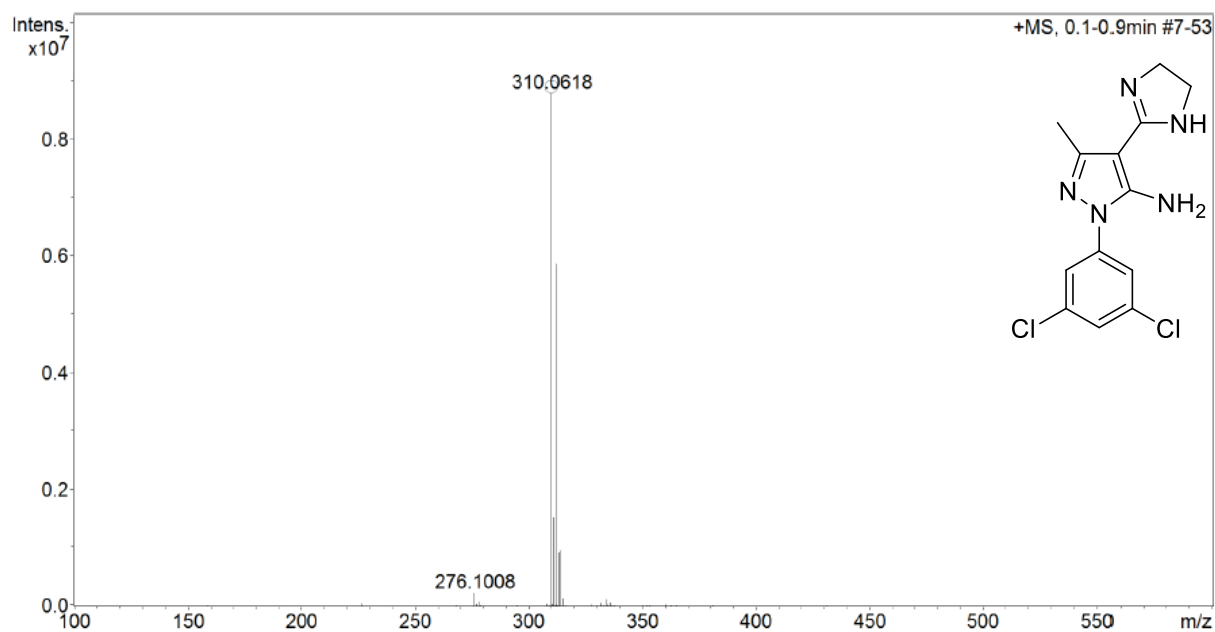



HRMS of compound **4c**

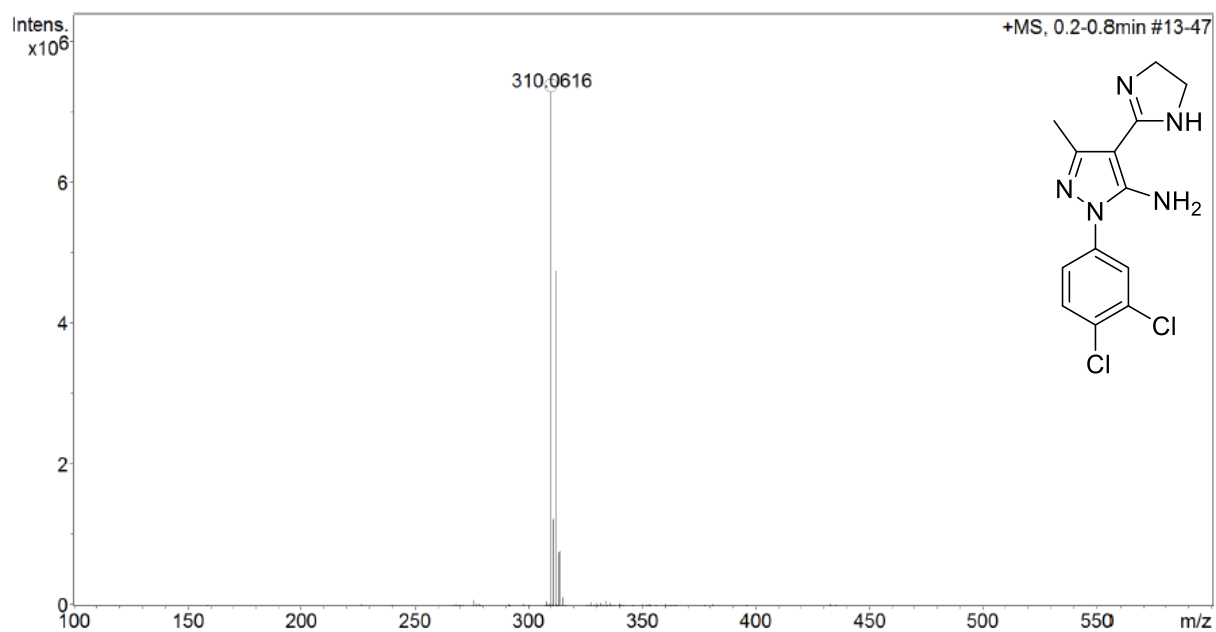

HRMS of compound **5a**

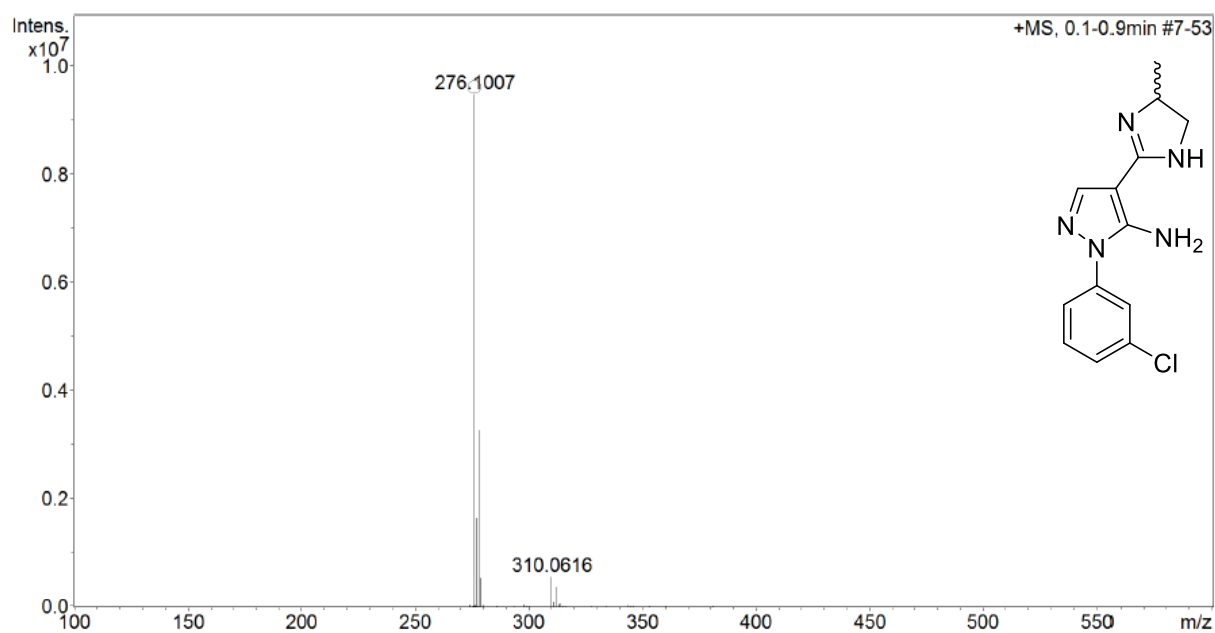

### HRMS of compound **5b**

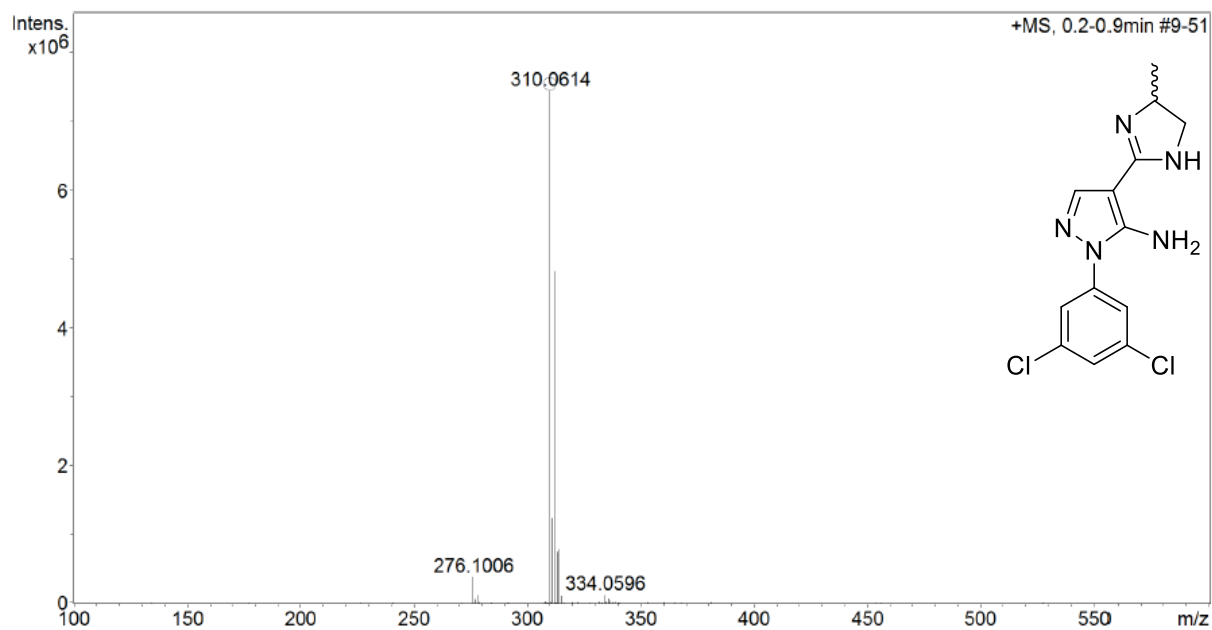

### HRMS of compound **5c**

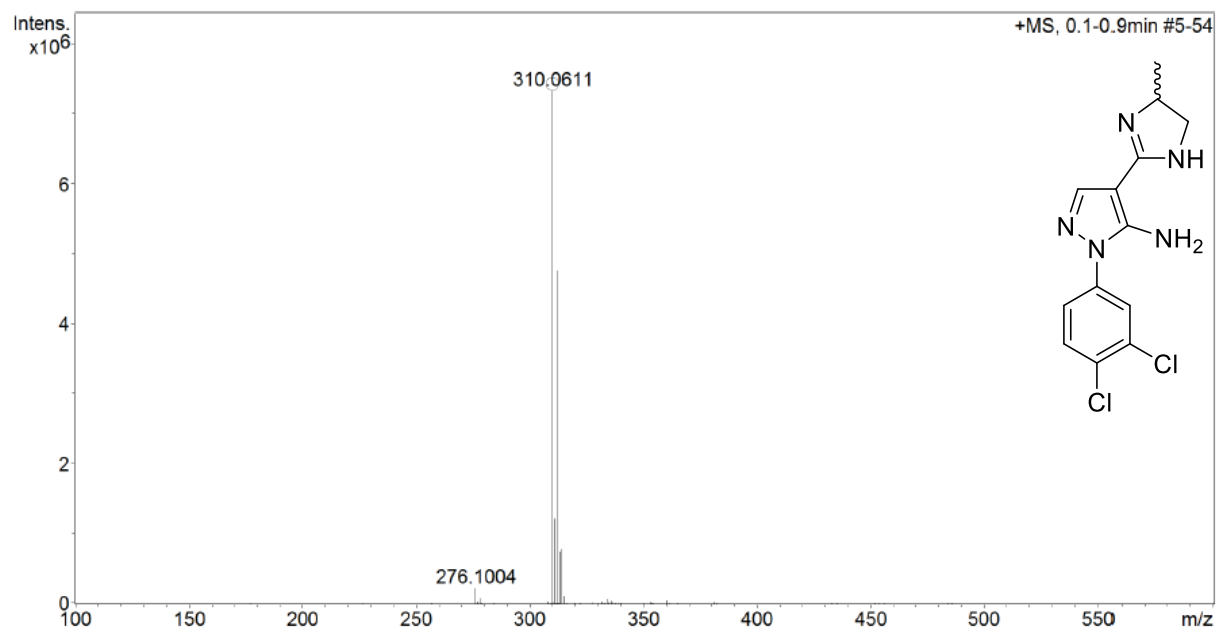

Supplement: s1 [file s1]
