# Supplementary material for: Structural Optimization and Biological Activity of Pyrazole Derivatives: Virtual Computational Analysis, Recovery Assay and 3D Culture Model as Potential Predictive Tools of Effectiveness against Trypanosoma cruzi
Source: MDPI journal article supplement (doi:10.3390/molecules26216742), 2021-11-08
Supplement: s1 [file s1]

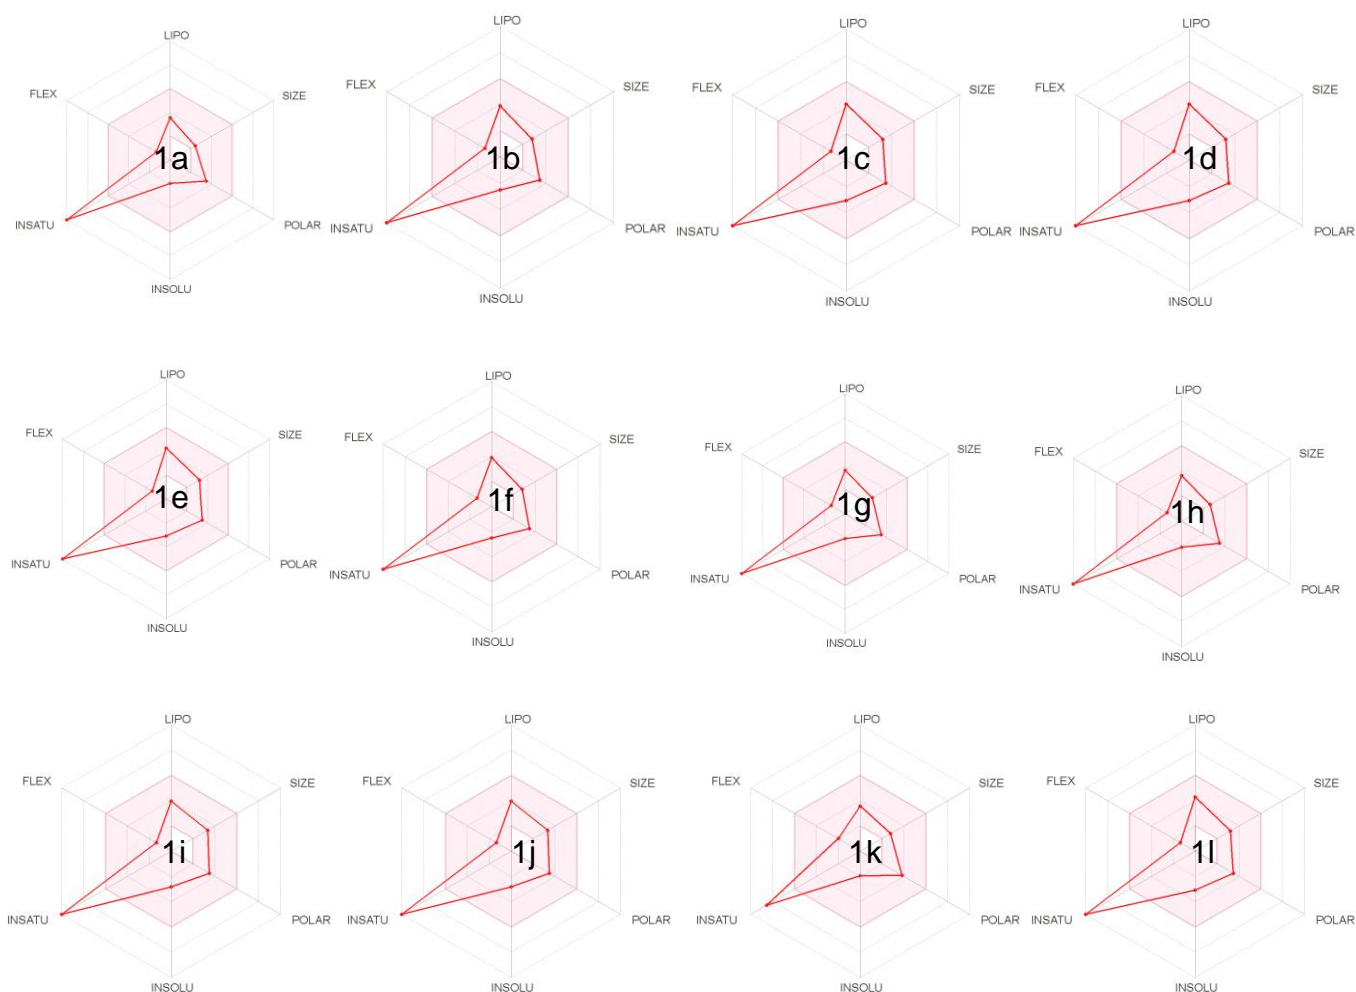

**Figure S1.** Bioavailability radar chart of pyrazole-carboxamide hybrids (series 1). LIPO (lipophilicity) = XLOGP3 between -0.7 and +5.0; SIZE (molecule size) = between 150 and 500 g/mol; POLAR (polarity) = TPSA between 20 and 130 Å<sup>2</sup>; INSOLU (insolubility)= LOG S <6; INSATU (saturation)= sp<sup>3</sup> carbon fraction ≥0.25; FLEX (flexibility) ≤9 rotatable groups.

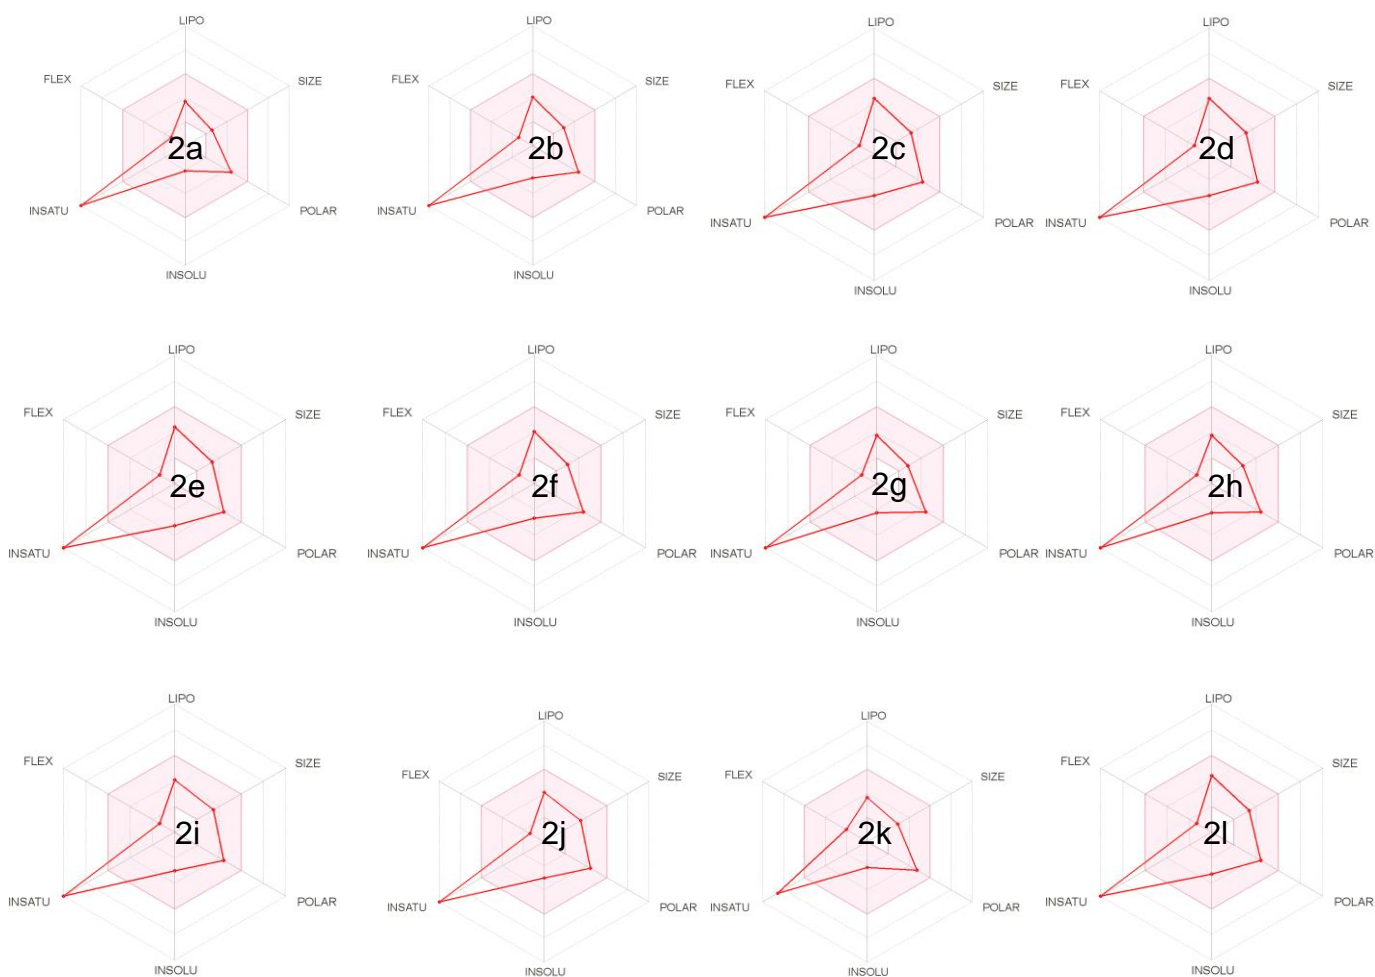

**Figure S2.** Bioavailability radar chart of pyrazole-carboxamide hybrids (series 2). LIPO (lipophilicity) = XLOGP3 between -0.7 and +5.0; SIZE (molecule size) = between 150 and 500 g/mol; POLAR (polarity) = TPSA between 20 and 130 Å<sup>2</sup>; INSOLU (insolubility)= LOG S <6; INSATU (saturation)= sp<sup>3</sup> carbon fraction ≥0.25; FLEX (flexibility) ≤9 rotatable groups.

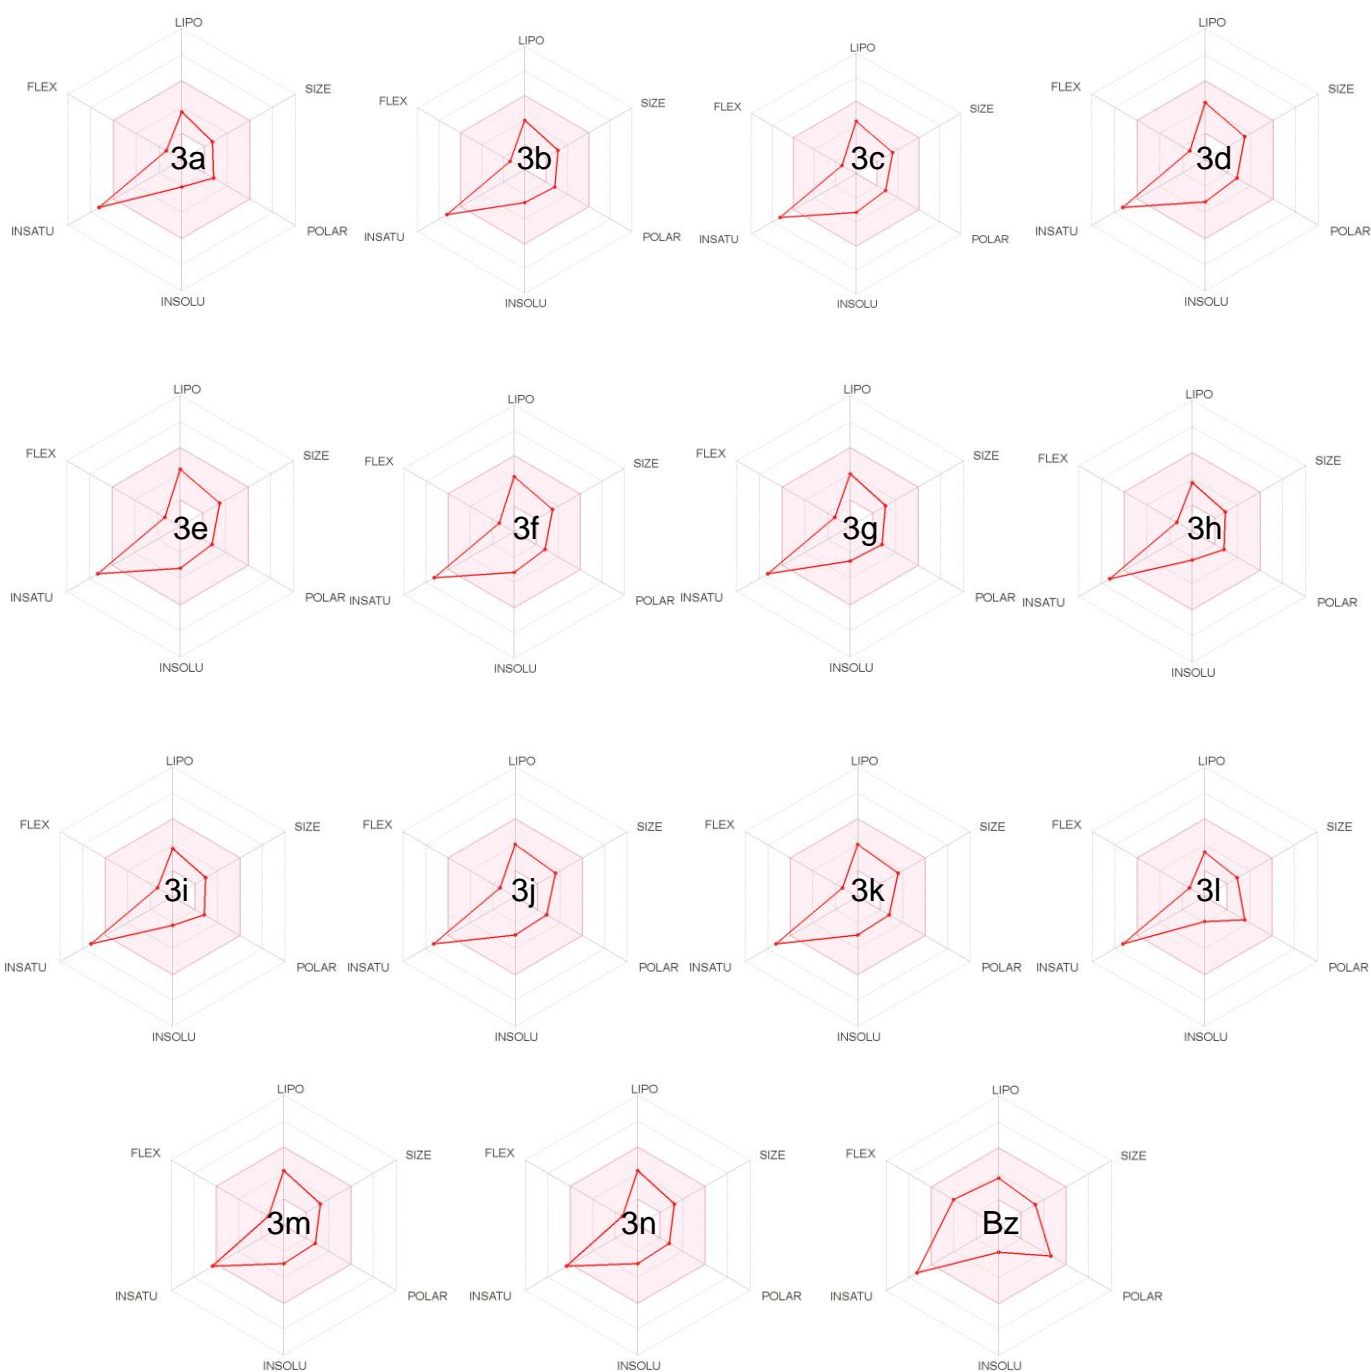

**Figure S3.** Bioavailability radar chart of pyrazol-imidazoline hybrids (series 3) and Bz. LIPO (lipophilicity) = XLOGP3 between -0.7 and +5.0; SIZE (molecule size) = between 150 and 500 g/mol; POLAR (polarity) = TPSA between 20 and 130 Å<sup>2</sup>; INSOLU (insolubility)= LOG S <6; INSATU (saturation)= sp<sup>3</sup> carbon fraction ≥0.25; FLEX (flexibility) ≤9 rotatable groups.

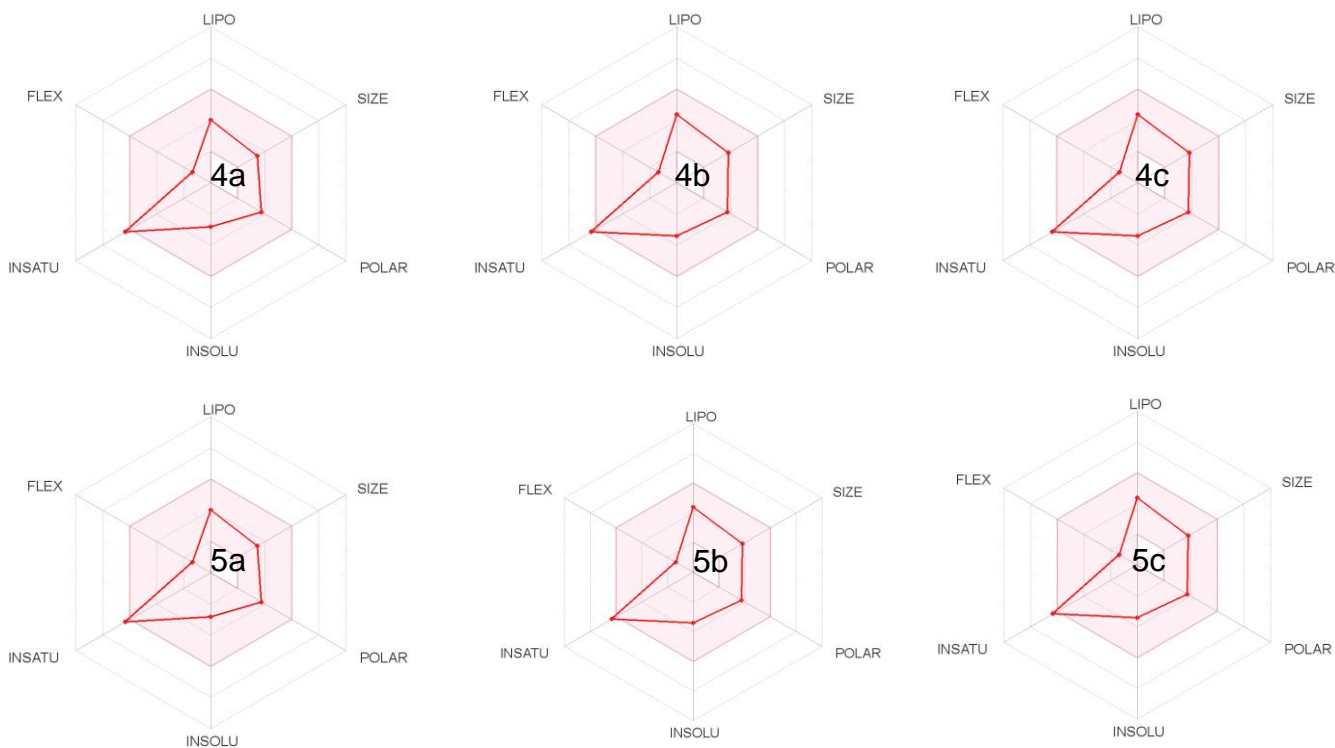

**Figure S4.** Bioavailability radar chart of pyrazole-imidazoline hybrids (series 4 and 5). LIPO (lipophilicity) = XLOGP3 between -0.7 and +5.0; SIZE (molecule size) = between 150 and 500 g/mol; POLAR (polarity) = TPSA between 20 and 130 Å<sup>2</sup>; INSOLU (insolubility)= LOG S <6; INSATU (saturation)= sp<sup>3</sup> carbon fraction ≥0.25; FLEX (flexibility) ≤9 rotatable groups.
